# Supplementary material for: Machine learning identified MDK score has prognostic value for idiopathic pulmonary fibrosis based on integrated bulk and single cell expression data
Source: Front Genet. 2023 Nov 24;14:1246983. doi: 10.3389/fgene.2023.1246983 (PMC10704369; doi:10.3389/fgene.2023.1246983)
Supplement: Supplementary file 2 [file Table3.XLSX]

## Sheet: Description
Table S3: Switch genes extracted from the pseudotime trace in the fibroblast and epithelial cells in IPF group and switch genes of epithelial cells from control group.
The following data sheets present the switch genes identified along the pseudotime trajectory from basal cells to AT2 cells in epithelial cells in both IPF and control groups or pseudotime trajectory from the lipofibroblasts to myofibroblasts in IPF patients.
geneID	Gene symbol
mu1	The μ symbol of the first gaussian distribution in switch genes.
mu2	The μ symbol of the second gaussian distribution in switch genes.
sigma1	The σ symbol of the first gaussian distribution in switch genes.
sigma2	The σ symbol of the second gaussian distribution in switch genes.
lambda1	The λ symbol of the first gaussian distribution in switch genes.
lambda2	The λ symbol of the second gaussian distribution in switch genes.
passBinary	Whether gene pass the binarize gene expression.
switch_at_time	The time when gene switches calculated by the model.
CI	Confidence interval of the switch genes.
pvalues	The p value of the switch genes.
pseudoR2s	McFadden’s Pseudo R2 to represent the quality of switch genes.
direction	The direction of the switche genes in the trajectory.
FDR	False discovery rate of the gene.
feature_type	The type of genes, including surface proteins, TFs and other genes
intersect_with_DEG(log2FC >0.58)	Whether this gene was also identified as differential expressed genes (adjusted p <0.05 and log2 fold change >0.58) of epithelial cells between IPF and control?
distinct switch genes (IPF vs Control)	Whether this gene was distinct switch gene in IPF group? TRUE means this gene was only found as switch gene in IPF group.
distinct switch genes (Control vs IPF)	Whether this gene was distinct switch gene in control group? TRUE means this gene was only found as switch gene in control group.

## Sheet: Fibroblast_IPF
	geneID	mu1	mu2	sigma1	sigma2	lambda1	lambda2	passBinary	switch_at_time	CI	pvalues	pseudoR2s	direction	FDR	feature_type
ENO1	ENO1	-0.00735143	1.84086	0.0917762	0.849424	0.241655	0.758345	TRUE	15.0671	1.94	2.30082e-83	0.170018	down	1.35474e-81	Surface proteins
LRRC8C	LRRC8C	-0.00130751	1.35841	0.100097	0.596842	0.873594	0.126406	TRUE	0.340895	0.61613	5.01446e-20	0.208692	down	2.79122e-19	Surface proteins
TGFBR3	TGFBR3	-0.00827841	1.44248	0.0970832	0.642303	0.514113	0.485887	TRUE	5.0152	1.73699	1.36797e-31	0.0478652	down	1.24533e-30	Surface proteins
F3	F3	-0.00633333	1.89346	0.0971837	1.10535	0.591075	0.408925	TRUE	2.69253	0.864073	2.34231e-68	0.136596	down	8.30548e-67	Surface proteins
ATP1A1	ATP1A1	-0.00297328	1.68457	0.0945516	0.742794	0.310275	0.689725	TRUE	12.902	1.77322	4.95901e-77	0.138139	down	2.393e-75	Surface proteins
MPZL1	MPZL1	-0.00403403	1.39337	0.094652	0.566196	0.446888	0.553112	TRUE	8.60674	1.84919	5.78426e-42	0.0647338	down	7.82181e-41	Surface proteins
SLC19A2	SLC19A2	-0.00440697	1.69839	0.0977986	0.917047	0.464595	0.535405	TRUE	6.64174	1.01409	3.67512e-95	0.179432	down	3.02397e-93	Surface proteins
PRRX1	PRRX1	-0.00339521	1.6029	0.0961463	0.716652	0.335184	0.664816	TRUE	15.8064	3.52888	1.43883e-25	0.0387749	down	1.03063e-24	TFs
PRRC2C	PRRC2C	-0.00814299	1.65324	0.0913155	0.73969	0.267569	0.732431	TRUE	18.2733	3.39575	1.40714e-34	0.0585609	down	1.44496e-33	Surface proteins
QSOX1	QSOX1	-0.00755081	1.40547	0.0952605	0.65641	0.434032	0.565968	TRUE	3.97659	1.92007	3.52578e-24	0.0356042	up	2.38697e-23	Surface proteins
LAMC1	LAMC1	-0.00493247	1.37139	0.0970801	0.546519	0.443668	0.556332	TRUE	9.54497	2.69783	7.45156e-23	0.0328032	down	4.68404e-22	Surface proteins
HMCN1	HMCN1	-0.000376887	1.39209	0.0970131	0.658433	0.577078	0.422922	TRUE	13.0741	3.24019	3.28633e-23	0.0338248	up	2.11128e-22	Surface proteins
CD55	CD55	-0.00292495	2.12738	0.0921778	1.22747	0.378847	0.621153	TRUE	10.0738	1.49482	3.88037e-76	0.129907	down	1.80466e-74	Surface proteins
CD34	CD34	0.0045136	1.6696	0.0962733	0.814466	0.4277	0.5723	TRUE	8.18852	1.22915	1.09702e-85	0.150875	down	6.90264e-84	Surface proteins
ATF3	ATF3	0.000303433	2.19221	0.0988884	1.16902	0.34573	0.65427	TRUE	11.4622	1.65339	2.58413e-74	0.12799	down	1.08398e-72	TFs
HNRNPU	HNRNPU	0.000234754	1.93547	0.0892127	0.934274	0.215189	0.784811	TRUE	17.0472	2.39149	3.36827e-65	0.133245	down	1.08088e-63	Surface proteins
OSR1	OSR1	-0.00362841	2.01211	0.0934167	1.20592	0.488057	0.511943	TRUE	5.99197	1.54617	6.29878e-43	0.0673831	down	8.7691e-42	TFs
FOSL2	FOSL2	-0.00399228	1.44166	0.0949142	0.622099	0.501576	0.498424	TRUE	5.87621	1.09985	5.15113e-75	0.132877	down	2.23378e-73	TFs
LTBP1	LTBP1	-1.30306e-05	1.60904	0.0960666	0.837588	0.407869	0.592131	TRUE	2.65028	1.83751	1.49819e-23	0.0349803	up	9.76181e-23	Surface proteins
CEBPZ	CEBPZ	-0.00386049	1.44748	0.0995118	0.57666	0.461018	0.538982	TRUE	7.41031	1.17016	8.54546e-84	0.148155	down	5.12568e-82	TFs
SLC8A1	SLC8A1	-0.00210552	1.16573	0.0997707	0.359447	0.884179	0.115821	TRUE	16.5945	4.27362	9.58744e-21	0.0908973	up	5.51858e-20	Surface proteins
REL	REL	0.00438367	1.45008	0.0955273	0.783421	0.594914	0.405086	TRUE	1.47737	1.12738	4.44754e-45	0.079212	down	6.68485e-44	TFs
CCT4	CCT4	-0.00180045	1.45109	0.0946982	0.582469	0.397088	0.602912	TRUE	10.6605	1.9034	1.40715e-50	0.080451	down	2.7202e-49	Surface proteins
RNF149	RNF149	-0.00277406	1.45322	0.0947312	0.626433	0.399846	0.600154	TRUE	9.94676	1.66405	1.66686e-60	0.0986518	down	4.5523e-59	Surface proteins
IL1R1	IL1R1	-0.00200485	1.86707	0.0919607	0.95879	0.303534	0.696466	TRUE	13.3225	1.91053	4.61618e-69	0.121546	down	1.70268e-67	Surface proteins
NR4A2	NR4A2	-0.00319607	1.91444	0.0920745	1.06003	0.524811	0.475189	TRUE	4.92351	0.96489	7.22485e-80	0.150114	down	3.92958e-78	TFs
SCN7A	SCN7A	-0.00294307	1.46447	0.094554	0.740654	0.681218	0.318782	TRUE	14.1977	1.97445	1.53283e-71	0.13086	up	5.96226e-70	Surface proteins
NRP2	NRP2	-0.00242472	1.23281	0.0977065	0.580759	0.876688	0.123312	TRUE	15.8203	3.53713	1.59507e-29	0.142647	up	1.34699e-28	Surface proteins
ACKR3	ACKR3	0.00204468	1.79713	0.0965727	0.931988	0.630287	0.369713	TRUE	2.23138	0.615467	1.32485e-79	0.217201	down	7.14527e-78	Surface proteins
SLC4A7	SLC4A7	-0.00334564	1.486	0.0924803	0.766303	0.612215	0.387785	TRUE	2.34884	0.729609	2.95454e-75	0.171878	down	1.31682e-73	Surface proteins
TGFBR2	TGFBR2	-0.000153872	1.50116	0.0967836	0.678592	0.390813	0.609187	TRUE	12.5141	3.13827	2.48097e-23	0.0339099	down	1.60351e-22	Surface proteins
CSRNP1	CSRNP1	0.000700377	1.51733	0.0961592	0.688781	0.508213	0.491787	TRUE	5.59021	1.00037	2.58369e-83	0.154716	down	1.50746e-81	TFs
LAMB2	LAMB2	4.95489e-05	1.36834	0.0974015	0.522798	0.489192	0.510808	TRUE	6.69714	1.92384	2.00456e-31	0.0470293	down	1.81713e-30	Surface proteins
CD47	CD47	-0.00234613	1.35239	0.0991342	0.510107	0.49186	0.50814	TRUE	6.63595	2.12506	4.41068e-26	0.0381616	down	3.22779e-25	Surface proteins
CCDC80	CCDC80	1.18534	4.25832	1.01824	0.895731	0.305799	0.694201	TRUE	11.9258	1.27057	1.45628e-151	0.477251	down	1.86927e-148	Surface proteins
ATP1B3	ATP1B3	-0.00250508	1.94023	0.0980416	0.988336	0.391046	0.608954	TRUE	9.14206	1.18339	6.52405e-106	0.198473	down	8.9088e-104	Surface proteins
PLSCR1	PLSCR1	-0.00387131	1.51464	0.0966764	0.73671	0.45839	0.54161	TRUE	7.35213	1.51496	2.57587e-52	0.0836903	down	5.35014e-51	TFs
CPZ	CPZ	-0.00385154	1.43087	0.0982357	0.612742	0.60792	0.39208	TRUE	1.71841	1.0739	9.26329e-49	0.0873017	down	1.62882e-47	Surface proteins
KLF3	KLF3	-0.000347977	1.55908	0.094754	0.846683	0.510365	0.489635	TRUE	4.97311	1.39138	7.79304e-46	0.0737068	down	1.21693e-44	TFs
EDNRA	EDNRA	-0.00244874	1.4113	0.099378	0.721943	0.812314	0.187686	TRUE	13.7222	2.01907	2.12421e-78	0.338529	up	1.09065e-76	Surface proteins
FAT1	FAT1	0.00316572	1.51981	0.0968848	0.828842	0.599065	0.400935	TRUE	0.172153	1.45505	6.09855e-30	0.0485778	down	5.21874e-29	Surface proteins
OSMR	OSMR	-0.00298579	1.45087	0.0972353	0.667183	0.499319	0.500681	TRUE	5.89686	1.25099	5.19785e-61	0.102298	down	1.45043e-59	Surface proteins
ITGA1	ITGA1	-0.00185705	1.22632	0.100788	0.473957	0.805077	0.194923	TRUE	16.513	3.35037	4.29278e-32	0.0870774	up	3.97562e-31	Surface proteins
NR2F1	NR2F1	-0.00276726	1.29172	0.0973767	0.59866	0.676518	0.323482	TRUE	16.105	2.79808	7.13355e-42	0.0701935	up	9.57806e-41	TFs
LOX	LOX	-0.0050384	1.41117	0.096678	0.667554	0.514819	0.485181	TRUE	4.31722	2.05967	4.57219e-22	0.0319982	down	2.78938e-21	Surface proteins
PRDM6	PRDM6	-0.00102665	1.13207	0.0948131	0.416601	0.88867	0.11133	TRUE	15.201	3.38122	3.00557e-30	0.156229	up	2.6032e-29	TFs
IRF1	IRF1	0.000737755	1.46291	0.0934638	0.804546	0.57084	0.42916	TRUE	1.34488	1.51687	1.50065e-29	0.0465882	down	1.26893e-28	TFs
MSX2	MSX2	-0.00294595	1.28448	0.0987585	0.683769	0.852815	0.147185	TRUE	0.327643	0.668409	3.79454e-24	0.199908	down	2.56621e-23	TFs
FGFR4	FGFR4	0.00293199	1.33528	0.0991026	0.624178	0.893264	0.106736	TRUE	14.9032	3.38261	2.6928e-36	0.456321	up	2.97973e-35	Surface proteins
HMGA1	HMGA1	-0.0029	1.6477	0.0965922	0.919974	0.685168	0.314832	TRUE	0.412772	0.664861	6.33529e-61	0.163506	down	1.76017e-59	TFs
SRSF3	SRSF3	-0.00374696	1.66801	0.0921401	0.708428	0.294548	0.705452	TRUE	14.5742	2.19641	2.86038e-59	0.103835	down	7.37266e-58	Surface proteins
COL12A1	COL12A1	-0.0029882	1.58513	0.0917684	0.936176	0.560994	0.439006	TRUE	2.79411	1.21839	3.58662e-45	0.0759357	down	5.41622e-44	Surface proteins
TPBG	TPBG	-0.00748029	1.33635	0.096217	0.575061	0.537745	0.462255	TRUE	4.01688	1.47702	1.23104e-37	0.0593084	down	1.42872e-36	Surface proteins
NT5E	NT5E	-0.00451058	1.32801	0.0991701	0.614056	0.631505	0.368495	TRUE	1.93119	0.718826	4.97408e-72	0.167427	down	1.9706e-70	Surface proteins
MOXD1	MOXD1	0.00402488	1.61241	0.0960699	0.778068	0.690073	0.309927	TRUE	13.0705	1.58705	1.41015e-101	0.205707	up	1.5604e-99	Surface proteins
TCF21	TCF21	6.50969e-05	1.90896	0.0984394	1.01817	0.551048	0.448952	TRUE	9.33599	1.56044	1.60053e-63	0.104283	up	4.84537e-62	TFs
THBS2	THBS2	-0.00108389	2.03117	0.0903202	1.04998	0.315731	0.684269	TRUE	12.2985	1.64262	4.23058e-84	0.152285	down	2.5615e-82	Surface proteins
ETV1	ETV1	-0.00085759	1.22828	0.103018	0.478903	0.79245	0.20755	TRUE	15.7293	2.85913	3.39628e-41	0.1083	up	4.44843e-40	TFs
MEOX2	MEOX2	-0.00217046	1.21528	0.10182	0.566975	0.880928	0.119072	TRUE	14.7041	2.93263	1.21445e-40	0.240383	up	1.56513e-39	TFs
GPNMB	GPNMB	-0.00542144	1.9213	0.0964221	0.836485	0.29417	0.70583	TRUE	13.6206	1.83127	1.10542e-78	0.145415	down	5.81524e-77	Surface proteins
CREB5	CREB5	-0.00494096	1.58749	0.0959736	0.804274	0.587195	0.412805	TRUE	2.9044	0.872957	2.28914e-69	0.137528	down	8.64219e-68	TFs
EGFR	EGFR	-0.00387002	1.35875	0.0984729	0.551187	0.556949	0.443051	TRUE	3.82253	1.15797	7.44143e-54	0.0920847	down	1.64121e-52	Surface proteins
SEMA3C	SEMA3C	-0.000483146	1.94101	0.0950973	1.18746	0.416495	0.583505	TRUE	8.76918	1.54049	1.43228e-60	0.0986276	down	3.92837e-59	Surface proteins
TFPI2	TFPI2	-0.000122447	2.28677	0.0966854	1.30473	0.64117	0.35883	TRUE	1.53372	0.734802	7.60655e-68	0.155848	down	2.6677e-66	Surface proteins
SGCE	SGCE	0.000456667	1.41004	0.0946472	0.558863	0.454344	0.545656	TRUE	8.24243	1.82034	2.01814e-41	0.0638262	down	2.65964e-40	Surface proteins
LAMB1	LAMB1	-0.00470535	1.41761	0.0964517	0.617966	0.564991	0.435009	TRUE	11.4904	2.79814	3.71085e-26	0.0383592	up	2.73122e-25	Surface proteins
ZNF800	ZNF800	-0.00320016	1.27103	0.0972982	0.461515	0.595668	0.404332	TRUE	2.74308	0.984778	1.46402e-59	0.110077	down	3.83513e-58	TFs
EGR3	EGR3	-0.0043315	1.46469	0.0984759	0.678879	0.617613	0.382387	TRUE	2.4628	0.68863	5.98906e-79	0.190435	down	3.17668e-77	TFs
EBF2	EBF2	-0.00328305	1.26482	0.0968239	0.454302	0.803605	0.196395	TRUE	0.690382	0.579992	1.90604e-37	0.217347	down	2.20017e-36	TFs
SCARA5	SCARA5	0.00479479	1.64637	0.0966735	0.742807	0.438189	0.561811	TRUE	8.09684	1.2793	1.40003e-78	0.135376	down	7.24628e-77	Surface proteins
FGFR1	FGFR1	-0.00969354	1.4981	0.0962747	0.622016	0.358853	0.641147	TRUE	13.2841	2.59977	2.05109e-36	0.0565708	down	2.27749e-35	Surface proteins
PLAT	PLAT	-0.00374005	1.52426	0.0936926	0.800997	0.584757	0.415243	TRUE	0.607435	1.59645	1.62919e-26	0.0414323	down	1.21724e-25	Surface proteins
SULF1	SULF1	-0.00282586	1.61201	0.095253	0.924786	0.526836	0.473164	TRUE	3.63005	1.71295	1.80291e-28	0.0430891	down	1.46284e-27	Surface proteins
ANGPT1	ANGPT1	-0.00275359	1.52142	0.0984056	0.719704	0.821035	0.178965	TRUE	13.7687	2.06329	1.40936e-75	0.336668	up	6.36991e-74	Surface proteins
MYC	MYC	0.000593612	2.85211	0.096859	1.24569	0.317835	0.682165	TRUE	10.5812	1.10173	1.70598e-159	0.481882	down	2.73725e-156	TFs
GLIS3	GLIS3	0.0004315	1.32819	0.0970724	0.626707	0.682719	0.317281	TRUE	0.345106	0.690064	7.91482e-61	0.155353	down	2.18954e-59	TFs
KLF9	KLF9	-0.00172673	1.88164	0.0943418	0.935582	0.267834	0.732166	TRUE	14.4089	1.95353	3.17929e-75	0.141247	down	1.40722e-73	TFs
CTSL	CTSL	0.556177	3.16763	0.644563	1.43529	0.314445	0.685555	TRUE	11.0063	1.1976	1.7056e-140	0.317943	down	9.9514e-138	Surface proteins
OGN	OGN	-0.0041908	1.86599	0.0940306	0.827869	0.310727	0.689273	TRUE	13.9885	2.14757	3.60848e-58	0.0997781	down	8.90741e-57	Surface proteins
ASPN	ASPN	0.0034019	2.09837	0.100184	1.34083	0.774703	0.225297	TRUE	17.6911	3.86912	3.83151e-26	0.0608223	up	2.8168e-25	Surface proteins
NR4A3	NR4A3	-0.0102718	2.01407	0.0926964	1.03611	0.466547	0.533453	TRUE	6.23933	0.75252	4.25191e-132	0.351504	down	1.51604e-129	TFs
KLF4	KLF4	0.00225735	2.26947	0.0968071	1.16929	0.327319	0.672681	TRUE	11.3209	1.37773	1.25353e-107	0.207577	down	1.82845e-105	TFs
TNC	TNC	-0.00193871	1.92658	0.0976938	1.25735	0.859751	0.140249	TRUE	14.5325	2.63509	1.8733e-49	0.254341	up	3.38671e-48	Surface proteins
TUBB4B	TUBB4B	-0.00383736	1.98789	0.0915011	0.917426	0.294264	0.705736	TRUE	12.1434	1.39306	1.27753e-119	0.25138	down	2.48459e-117	Surface proteins
DKK3	DKK3	0.0023884	1.76986	0.094615	0.920602	0.663221	0.336779	TRUE	11.6311	1.29905	1.25757e-129	0.281137	up	3.66866e-127	Surface proteins
RCN1	RCN1	-0.000698574	1.57402	0.0931582	0.64637	0.321462	0.678538	TRUE	16.9244	3.67761	4.06391e-26	0.0403828	down	2.98423e-25	Surface proteins
WT1	WT1	-0.00521036	1.4727	0.0970729	0.630204	0.65687	0.34313	TRUE	1.76762	0.57457	4.69156e-75	0.222657	down	2.04833e-73	TFs
CD44	CD44	-0.00450174	1.77444	0.0993347	0.859351	0.311138	0.688862	TRUE	14.4172	2.44627	1.95707e-46	0.0765674	down	3.12449e-45	Surface proteins
CD82	CD82	-0.00248206	1.52575	0.102816	0.738609	0.771542	0.228458	TRUE	13.2329	1.7207	1.01323e-99	0.349423	up	9.85292e-98	Surface proteins
SLC43A3	SLC43A3	-0.00260975	1.26043	0.0955272	0.480396	0.622514	0.377486	TRUE	0.032516	1.34395	2.89959e-33	0.0557725	down	2.83251e-32	Surface proteins
LRRN4CL	LRRN4CL	0.00119742	1.41859	0.0975493	0.619883	0.545007	0.454993	TRUE	4.2578	1.06204	4.0692e-64	0.11391	down	1.26165e-62	Surface proteins
SLC3A2	SLC3A2	0.00186537	1.4251	0.0996285	0.599285	0.416915	0.583085	TRUE	9.13406	1.49323	2.10357e-67	0.111865	down	7.21965e-66	Surface proteins
FOSL1	FOSL1	-0.00121102	1.81491	0.0954486	0.845149	0.509665	0.490335	TRUE	5.22016	0.676082	7.99118e-121	0.349325	down	1.60273e-118	TFs
PRSS23	PRSS23	-0.0033513	1.9674	0.0916364	1.0972	0.456306	0.543694	TRUE	7.42545	1.51542	9.23364e-53	0.0844745	down	1.943e-51	Surface proteins
ADAMTS15	ADAMTS15	-0.0017271	1.45114	0.0969103	0.643009	0.752193	0.247807	TRUE	0.534375	0.607669	2.41266e-48	0.192402	down	4.15132e-47	Surface proteins
ITGA8	ITGA8	-0.0005732	1.45423	0.0999835	0.673438	0.801687	0.198313	TRUE	13.5893	1.91507	1.12912e-85	0.347498	up	7.03564e-84	Surface proteins
CREM	CREM	-0.00461509	1.61664	0.0959376	0.845134	0.517538	0.482462	TRUE	5.1187	0.966941	7.95472e-82	0.153997	down	4.47837e-80	TFs
PLAU	PLAU	-0.000941975	2.13937	0.0944054	1.24389	0.524526	0.475474	TRUE	4.93363	0.881805	6.14179e-90	0.179834	down	4.47932e-88	Surface proteins
MYOF	MYOF	-0.000949363	1.27483	0.0959789	0.529057	0.585363	0.414637	TRUE	1.50619	1.45912	1.36237e-31	0.0503584	down	1.242e-30	Surface proteins
TNFRSF1A	TNFRSF1A	-0.00219214	1.84003	0.0935287	0.815943	0.257823	0.742177	TRUE	16.4623	2.53675	1.86469e-53	0.0970541	down	4.04311e-52	Surface proteins
CD4	CD4	-0.000990413	1.16323	0.100092	0.39809	0.84997	0.15003	TRUE	16.4502	3.66071	1.56548e-27	0.0965365	up	1.22528e-26	Surface proteins
MFAP5	MFAP5	0.00237188	2.98375	0.0956759	1.55967	0.553253	0.446747	TRUE	4.35592	0.692929	6.28416e-104	0.262434	down	7.33304e-102	Surface proteins
A2M	A2M	0.00235724	3.55441	0.0926208	1.94736	0.31135	0.68865	TRUE	0.681827	0.787797	1.49353e-59	0.132737	up	3.89653e-58	Surface proteins
YBX3	YBX3	-0.0101438	1.67388	0.0928396	0.72876	0.273044	0.726956	TRUE	14.1327	1.86477	1.02223e-80	0.153831	down	5.65574e-79	TFs
GPRC5A	GPRC5A	-0.00106852	2.29375	0.0969326	1.02974	0.393346	0.606654	TRUE	7.82675	0.83666	5.02783e-149	0.540426	down	4.60981e-146	Surface proteins
PLBD1	PLBD1	0.00111233	1.23948	0.0936761	0.42056	0.625525	0.374475	TRUE	0.756997	1.17794	9.51012e-41	0.0711212	down	1.23056e-39	Surface proteins
RERG	RERG	0.00180891	1.2484	0.0981779	0.453759	0.796029	0.203971	TRUE	15.639	2.87379	2.91849e-40	0.10698	up	3.70175e-39	Surface proteins
NR4A1	NR4A1	-0.000810105	2.8947	0.0889573	1.31974	0.226753	0.773247	TRUE	14.2858	1.62734	1.41052e-119	0.320241	down	2.66256e-117	TFs
PCBP2	PCBP2	0.68705	2.54208	0.647902	0.829581	0.289208	0.710792	TRUE	15.302	2.24598	2.38576e-61	0.111332	down	6.71571e-60	Surface proteins
ITGA5	ITGA5	-0.00374803	1.53038	0.0954398	0.76188	0.55871	0.44129	TRUE	3.9551	0.83157	1.35304e-83	0.172193	down	8.04054e-82	Surface proteins
TSPAN8	TSPAN8	0.00310702	1.54595	0.0966911	0.870206	0.812479	0.187521	TRUE	14.1346	2.20135	8.28412e-66	0.249558	up	2.67173e-64	Surface proteins
POSTN	POSTN	0.000257814	2.58814	0.0964621	1.73407	0.822127	0.177873	TRUE	15.9456	3.18436	1.55629e-34	0.108728	up	1.59557e-33	Surface proteins
ELF1	ELF1	-0.00321103	1.2772	0.0990223	0.48662	0.567883	0.432117	TRUE	1.61535	1.87201	1.52522e-21	0.0318976	down	9.1399e-21	TFs
HIF1A	HIF1A	-0.000768108	1.92942	0.0892314	0.990696	0.282496	0.717504	TRUE	15.4813	2.52041	7.58075e-49	0.0835854	down	1.33663e-47	TFs
SERPINA1	SERPINA1	-0.00146916	1.2335	0.0984857	0.586688	0.837765	0.162235	TRUE	17.8723	4.63155	4.32783e-19	0.0600876	up	2.28797e-18	Surface proteins
SERPINA3	SERPINA3	-0.000287698	1.52006	0.0987199	0.908857	0.828534	0.171466	TRUE	14.7813	2.68474	9.52938e-45	0.162622	up	1.42232e-43	Surface proteins
YY1	YY1	0.00057883	1.2535	0.0982355	0.464943	0.573537	0.426463	TRUE	1.25559	1.88275	5.17733e-21	0.0311079	down	3.01252e-20	TFs
THBS1	THBS1	0.00136262	3.45444	0.0916469	1.67886	0.265198	0.734802	TRUE	13.8465	1.67497	4.20417e-100	0.208734	down	4.28292e-98	Surface proteins
ISLR	ISLR	-0.0102125	1.80655	0.0937065	0.887072	0.293713	0.706287	TRUE	18.1635	3.87949	3.14053e-26	0.0414603	down	2.31944e-25	Surface proteins
MFGE8	MFGE8	-0.00639536	1.55367	0.0903085	0.698249	0.406496	0.593504	TRUE	11.3541	2.7807	4.25435e-26	0.038238	down	3.11694e-25	Surface proteins
NR2F2	NR2F2	-0.00277514	1.21768	0.099166	0.4604	0.749531	0.250469	TRUE	16.0381	2.88411	4.68075e-40	0.0846044	up	5.85595e-39	TFs
VASN	VASN	-0.00521204	1.70572	0.0903043	0.845661	0.419251	0.580749	TRUE	9.26158	1.78832	2.40846e-48	0.0760097	down	4.15132e-47	Surface proteins
RSL1D1	RSL1D1	-0.00592964	1.61721	0.0974409	0.672117	0.320217	0.679783	TRUE	12.6134	1.72181	4.00097e-79	0.141872	down	2.13985e-77	Surface proteins
CES1	CES1	0.00370897	1.72823	0.0991008	0.904867	0.633918	0.366082	TRUE	10.7241	1.20412	8.68398e-132	0.27978	up	2.93336e-129	Surface proteins
CDH11	CDH11	-0.000756971	1.5343	0.0974839	0.821259	0.513301	0.486699	TRUE	8.18275	1.52012	1.1583e-57	0.0932764	up	2.8159e-56	Surface proteins
SLC7A5	SLC7A5	-0.00181979	1.24205	0.0995194	0.491457	0.827109	0.172891	TRUE	0.204608	0.730536	3.23395e-32	0.179183	down	3.02118e-31	Surface proteins
ZNF207	ZNF207	-0.00765292	1.32893	0.0988014	0.503412	0.477096	0.522904	TRUE	7.628	2.50029	1.61069e-21	0.030684	down	9.62514e-21	TFs
PLXDC1	PLXDC1	-0.00614919	1.29037	0.0977004	0.541133	0.652605	0.347395	TRUE	0.0995745	0.998772	3.34039e-47	0.09135	down	5.49708e-46	Surface proteins
AOC3	AOC3	-0.00314225	1.25471	0.0964909	0.633525	0.817157	0.182843	TRUE	14.967	2.64742	1.59605e-46	0.152886	up	2.56729e-45	Surface proteins
TBX2	TBX2	-0.00105627	1.20513	0.103229	0.444449	0.88672	0.11328	TRUE	14.6909	2.91792	6.16465e-44	0.330659	up	8.85117e-43	TFs
EMILIN2	EMILIN2	0.00211573	1.30165	0.0969148	0.565541	0.759623	0.240377	TRUE	0.511974	0.610532	2.87346e-46	0.189379	down	4.56481e-45	Surface proteins
TGIF1	TGIF1	-0.00167793	1.46838	0.0978874	0.694523	0.558788	0.441212	TRUE	3.22288	1.26312	1.41177e-44	0.0738385	down	2.10226e-43	TFs
TUBB6	TUBB6	-0.00403765	1.64047	0.0936755	0.706796	0.362402	0.637598	TRUE	10.4039	1.33126	5.46966e-101	0.186915	down	5.85072e-99	Surface proteins
NOP56	NOP56	0.00153267	1.3135	0.0978076	0.480594	0.58382	0.41618	TRUE	3.13608	1.02942	8.80331e-59	0.106015	down	2.23319e-57	Surface proteins
PHF20	PHF20	-0.000382088	1.28227	0.100237	0.456203	0.610923	0.389077	TRUE	0.805124	1.33447	1.21477e-34	0.0574306	down	1.24942e-33	TFs
CEBPB	CEBPB	0.00158068	1.78457	0.0884664	0.843734	0.294976	0.705024	TRUE	14.5027	2.22594	3.90103e-57	0.0989306	down	9.3421e-56	TFs
TSHZ2	TSHZ2	-0.00237485	1.44775	0.0984895	0.593907	0.437197	0.562803	TRUE	8.91842	1.78857	2.18911e-46	0.0725033	down	3.48628e-45	TFs
PTBP1	PTBP1	0.000383369	1.28248	0.0983946	0.465382	0.54424	0.45576	TRUE	4.18819	1.37975	9.65418e-43	0.0687455	down	1.33536e-41	Surface proteins
DOT1L	DOT1L	-0.00386994	1.16764	0.0988952	0.419653	0.834072	0.165928	TRUE	0.065898	0.809879	3.18064e-31	0.161313	down	2.86302e-30	TFs
C3	C3	0.861189	4.44598	0.919416	1.10655	0.237342	0.762658	TRUE	13.8313	1.5891	6.93818e-128	0.460626	down	1.93605e-125	Surface proteins
ANGPTL4	ANGPTL4	0.00285571	2.27033	0.0949725	1.2646	0.452167	0.547833	TRUE	7.56332	1.32102	6.21678e-69	0.115835	down	2.2542e-67	Surface proteins
ICAM1	ICAM1	-0.00480936	1.73032	0.0948104	1.0601	0.541043	0.458957	TRUE	2.9937	1.50179	1.80134e-33	0.0524996	down	1.78411e-32	Surface proteins
JUND	JUND	-0.00647792	1.5576	0.0924943	0.685085	0.330722	0.669278	TRUE	14.4364	2.68924	2.38808e-38	0.0610362	down	2.83828e-37	TFs
PLAUR	PLAUR	0.00292553	2.09044	0.098319	1.0581	0.365539	0.634461	TRUE	9.43484	1.06649	4.14178e-136	0.292179	down	1.56364e-133	Surface proteins
PVRL2	PVRL2	-0.00221609	1.31467	0.100413	0.510639	0.546004	0.453996	TRUE	3.69509	1.57827	8.81318e-33	0.0506968	down	8.49294e-32	Surface proteins
FOSB	FOSB	-0.00664043	2.53783	0.0924601	1.27374	0.251571	0.748429	TRUE	16.0361	2.3244	7.8674e-62	0.116128	down	2.24413e-60	TFs
PTGIR	PTGIR	0.00341515	1.11996	0.099365	0.343613	0.887199	0.112801	TRUE	16.5829	4.11328	3.86187e-23	0.109797	up	2.46132e-22	Surface proteins
XBP1	XBP1	-0.00467155	1.85652	0.095687	0.831747	0.28817	0.71183	TRUE	13.448	1.74548	1.02921e-85	0.162326	down	6.54007e-84	TFs
MAFF	MAFF	0.00081554	1.69946	0.0923982	0.894165	0.462735	0.537265	TRUE	6.64564	0.947789	1.04372e-105	0.209938	down	1.39554e-103	TFs
ATF4	ATF4	-0.00275333	1.43692	0.0935435	0.595665	0.429559	0.570441	TRUE	9.37655	1.94639	1.22177e-41	0.0641748	down	1.61677e-40	TFs
XRCC6	XRCC6	-0.00441081	1.4042	0.0950054	0.534673	0.417652	0.582348	TRUE	11.0167	2.6465	1.10152e-27	0.0407948	down	8.6531e-27	Surface proteins
RUNX1	RUNX1	-0.00199955	1.53436	0.0962827	0.770572	0.461924	0.538076	TRUE	7.51816	2.16312	1.00008e-27	0.0407503	down	7.8658e-27	TFs
ERRFI1	ERRFI1	0.00322972	2.87677	0.0960402	1.36216	0.321656	0.678344	TRUE	10.3833	1.07891	5.89634e-160	0.467719	down	1.26142e-156	All genes
SPSB1	SPSB1	0.00130934	1.97641	0.0922617	1.02809	0.419864	0.580136	TRUE	7.77873	0.934667	6.60005e-130	0.281289	down	2.11796e-127	All genes
SLC25A33	SLC25A33	-0.0030726	1.28904	0.101448	0.458249	0.698766	0.301234	TRUE	0.0838016	0.727829	3.37888e-57	0.143656	down	8.12198e-56	All genes
SRM	SRM	-0.00321292	1.41044	0.0963478	0.581093	0.491546	0.508454	TRUE	6.28527	1.43887	2.23238e-50	0.0808977	down	4.27683e-49	All genes
PDPN	PDPN	-0.00404185	1.7513	0.0975775	0.801124	0.403583	0.596417	TRUE	9.31064	1.36127	1.26635e-82	0.143349	down	7.32204e-81	All genes
PLA2G2A	PLA2G2A	-0.00365098	4.00554	0.100381	2.00039	0.386515	0.613485	TRUE	8.96002	0.995282	6.04777e-143	0.323634	down	4.31274e-140	All genes
PNRC2	PNRC2	0.00093729	1.40851	0.0959137	0.572642	0.410257	0.589743	TRUE	11.1766	2.63496	2.14841e-28	0.0419972	down	1.7344e-27	All genes
RSRP1	RSRP1	-0.00327297	1.52385	0.0976627	0.630464	0.423043	0.576957	TRUE	10.7411	2.7336	2.77566e-25	0.0368181	down	1.96191e-24	All genes
ZNF593	ZNF593	0.00134744	1.43686	0.0976095	0.585902	0.48716	0.51284	TRUE	6.50856	1.23892	4.20052e-67	0.113726	down	1.41146e-65	All genes
YTHDF2	YTHDF2	0.00144393	1.27701	0.0972913	0.462517	0.56034	0.43966	TRUE	2.77625	1.62015	3.67405e-29	0.0447872	down	3.06633e-28	All genes
EIF3I	EIF3I	-0.00218534	1.35845	0.10058	0.509697	0.439125	0.560875	TRUE	10.0913	2.75972	3.38295e-23	0.0333819	down	2.16684e-22	All genes
MARCKSL1	MARCKSL1	-0.00152117	1.52707	0.0983995	0.703387	0.535769	0.464231	TRUE	4.18179	1.4157	5.59747e-41	0.0653963	down	7.30174e-40	All genes
SFPQ	SFPQ	0.00669165	1.79033	0.0942977	0.757533	0.255931	0.744069	TRUE	14.7134	1.89285	2.99928e-84	0.168854	down	1.83327e-82	All genes
GNL2	GNL2	-0.000607049	1.21427	0.101851	0.395847	0.661286	0.338714	TRUE	0.0753189	0.996101	2.94893e-47	0.0916853	down	4.86535e-46	All genes
UTP11L	UTP11L	-0.00635717	1.22294	0.098859	0.393775	0.638321	0.361679	TRUE	0.766601	1.05136	1.20302e-46	0.0859398	down	1.94482e-45	All genes
AKIRIN1	AKIRIN1	-0.00144401	1.31706	0.0981398	0.487429	0.592968	0.407032	TRUE	2.79575	0.97932	2.69849e-60	0.11172	down	7.30755e-59	All genes
NASP	NASP	-0.00250929	1.2565	0.0995963	0.466919	0.569191	0.430809	TRUE	1.65715	1.82028	1.39635e-22	0.0336886	down	8.70075e-22	All genes
MAGOH	MAGOH	-0.00269601	1.23213	0.0969053	0.434973	0.540124	0.459876	TRUE	4.25083	1.46703	6.17383e-39	0.0615012	down	7.49029e-38	All genes
SERBP1	SERBP1	-0.00570062	1.81532	0.0914677	0.754513	0.238243	0.761757	TRUE	16.4235	2.29031	6.4023e-67	0.132942	down	2.11804e-65	All genes
GNG12	GNG12	0.000852945	1.33893	0.0941933	0.608091	0.502259	0.497741	TRUE	5.28229	2.03406	1.28547e-24	0.0359997	down	8.88067e-24	All genes
LINC01140	LINC01140	0.00080265	1.13898	0.098379	0.423433	0.871471	0.128529	TRUE	17.5451	4.7497	3.84786e-18	0.0706978	up	1.95068e-17	All genes
LMO4	LMO4	-0.00642198	1.36866	0.0943345	0.602098	0.536235	0.463765	TRUE	10.028	2.69983	5.18229e-24	0.0346913	up	3.47907e-23	All genes
TMED5	TMED5	-0.00726339	1.4689	0.0928906	0.634799	0.443806	0.556194	TRUE	8.03508	1.36685	5.91334e-69	0.115404	down	2.15635e-67	All genes
DNTTIP2	DNTTIP2	0.00254364	1.33607	0.0988721	0.491788	0.57476	0.42524	TRUE	3.74304	0.866226	9.69441e-78	0.155063	down	4.80313e-76	All genes
GCLM	GCLM	-0.00695589	1.40765	0.0954311	0.662036	0.680733	0.319267	TRUE	0.601427	0.663835	3.02462e-63	0.165474	down	8.98703e-62	All genes
PLPPR4	PLPPR4	-0.00259276	1.27372	0.101487	0.607177	0.883963	0.116037	TRUE	15.2952	3.20444	9.49805e-36	0.198624	up	1.02279e-34	All genes
RAP1A	RAP1A	0.0008567	1.25174	0.0987068	0.433874	0.562149	0.437851	TRUE	2.7632	1.65086	2.89046e-28	0.0431896	down	2.31598e-27	All genes
SLC16A1	SLC16A1	-0.0026684	1.31825	0.0970607	0.554156	0.63516	0.36484	TRUE	1.28931	0.884444	8.77871e-58	0.116182	down	2.14227e-56	All genes
NGF	NGF	-0.00112662	1.28401	0.0965416	0.608361	0.833027	0.166973	TRUE	0.176859	0.760365	5.60657e-30	0.171691	down	4.80414e-29	All genes
RP11-14N7.2	RP11-14N7.2	0.00374912	1.50212	0.0965965	0.739589	0.564365	0.435635	TRUE	2.62765	1.34124	1.08918e-38	0.0629226	down	1.30905e-37	All genes
RBM8A	RBM8A	-0.00564262	1.46091	0.0909276	0.567545	0.364737	0.635263	TRUE	12.6865	2.34551	5.78897e-42	0.0661375	down	7.82181e-41	All genes
TXNIP	TXNIP	-0.00294397	1.67629	0.0948798	0.919256	0.540489	0.459511	TRUE	9.5378	1.82135	3.09529e-48	0.0758451	up	5.31165e-47	All genes
CDC42SE1	CDC42SE1	-0.00188539	1.2924	0.0989484	0.491488	0.618288	0.381712	TRUE	1.57455	1.02015	3.27974e-51	0.0942308	down	6.49672e-50	All genes
MLLT11	MLLT11	-0.00196341	1.53053	0.0981745	0.715478	0.663006	0.336994	TRUE	0.990052	0.703563	4.63752e-65	0.157987	down	1.48078e-63	All genes
ILF2	ILF2	0.005646	1.43802	0.0983505	0.573645	0.406227	0.593773	TRUE	10.1758	1.82458	6.79704e-52	0.0826415	down	1.38928e-50	All genes
TPM3	TPM3	-0.0045295	1.41638	0.0945015	0.610568	0.431071	0.568929	TRUE	10.2189	2.83271	2.18677e-22	0.0320877	down	1.34949e-21	All genes
CCT3	CCT3	0.000142048	1.41602	0.0949268	0.561774	0.452463	0.547537	TRUE	7.91442	1.41209	6.64482e-64	0.10544	down	2.0405e-62	All genes
CRABP2	CRABP2	0.000411131	1.97718	0.0887236	1.14153	0.428954	0.571046	TRUE	8.12257	1.32915	1.77335e-73	0.124584	down	7.29573e-72	All genes
IFI16	IFI16	-0.00361465	1.88011	0.0885277	0.925482	0.235313	0.764687	TRUE	16.3132	2.31598	2.26551e-64	0.12472	down	7.12748e-63	All genes
PEA15	PEA15	-0.000859595	1.50276	0.0939251	0.658258	0.429175	0.570825	TRUE	8.52586	1.38251	4.53283e-72	0.121393	down	1.80694e-70	All genes
PFDN2	PFDN2	-0.00918871	1.72933	0.0953558	0.760857	0.329553	0.670447	TRUE	11.6205	1.47246	3.26839e-97	0.181493	down	2.91341e-95	All genes
UAP1	UAP1	0.00490133	2.53696	0.0947016	1.16225	0.273753	0.726247	TRUE	12.0472	1.28144	2.24589e-150	0.44494	down	2.40235e-147	All genes
FMO3	FMO3	-0.00121474	1.2931	0.0982542	0.548027	0.874801	0.125199	TRUE	15.5265	3.37478	4.54824e-31	0.142723	up	4.0826e-30	All genes
CACYBP	CACYBP	-0.00196718	1.36775	0.0932848	0.748664	0.57249	0.42751	TRUE	0.686999	1.68273	1.52504e-24	0.0376951	down	1.05131e-23	All genes
ABL2	ABL2	-0.00453514	1.78032	0.0960788	0.913702	0.455514	0.544486	TRUE	6.90459	0.925625	3.77476e-114	0.234639	down	6.92183e-112	All genes
C1orf21	C1orf21	0.000839107	1.37362	0.0919062	0.574731	0.528813	0.471187	TRUE	4.77086	1.27288	8.56229e-52	0.0856624	down	1.73353e-50	All genes
IVNS1ABP	IVNS1ABP	-0.00176932	1.26702	0.100394	0.498148	0.636462	0.363538	TRUE	0.973908	0.958482	3.65676e-52	0.100619	down	7.54633e-51	All genes
RGS2	RGS2	0.005604	1.60666	0.0918497	0.976008	0.580232	0.419768	TRUE	0.760753	1.49081	1.60427e-29	0.047089	down	1.35299e-28	All genes
TIMM17A	TIMM17A	-0.00248383	1.21735	0.097429	0.40735	0.592139	0.407861	TRUE	1.55372	1.44453	3.72743e-32	0.051402	down	3.46705e-31	All genes
SNRPE	SNRPE	-0.00578452	1.28903	0.10081	0.464444	0.491969	0.508031	TRUE	6.59517	1.88819	3.79028e-32	0.0482742	down	3.51532e-31	All genes
CAPN2	CAPN2	-0.00652983	1.46791	0.093497	0.648041	0.407621	0.592379	TRUE	10.5535	2.28117	4.83427e-35	0.0530285	down	5.06966e-34	All genes
TOMM20	TOMM20	-0.00325127	1.50674	0.0923667	0.62279	0.295332	0.704668	TRUE	18.0448	3.71976	3.30946e-28	0.0451932	down	2.64181e-27	All genes
RHOB	RHOB	-0.00518231	2.22773	0.0913564	1.15571	0.258799	0.741201	TRUE	16.8186	2.71798	7.93429e-48	0.0849105	down	1.34006e-46	All genes
EMILIN1	EMILIN1	0.00363189	1.32217	0.0949282	0.601927	0.573046	0.426954	TRUE	11.4712	2.40619	6.09223e-35	0.0531109	up	6.3474e-34	All genes
WDR43	WDR43	-0.00373766	1.37822	0.100578	0.555791	0.550235	0.449765	TRUE	4.43917	0.827585	4.79855e-90	0.18764	down	3.53989e-88	All genes
LBH	LBH	-0.00335751	1.53723	0.09787	0.847026	0.582108	0.417892	TRUE	10.8542	1.73399	2.08927e-62	0.102926	up	6.06738e-61	All genes
CYP1B1	CYP1B1	-0.00326724	2.49103	0.0958458	1.29492	0.384706	0.615294	TRUE	9.47851	1.21923	3.85888e-105	0.196354	down	4.95325e-103	All genes
SRSF7	SRSF7	-0.00414662	1.92843	0.0945383	0.833326	0.229166	0.770834	TRUE	15.4897	1.95458	5.6538e-87	0.188503	down	3.74083e-85	All genes
EML4	EML4	-0.00247362	1.28912	0.0969706	0.505441	0.585322	0.414678	TRUE	1.28727	1.57777	9.3062e-28	0.0432511	down	7.32849e-27	All genes
PLEKHH2	PLEKHH2	-0.00158268	1.30834	0.0952213	0.613939	0.731031	0.268969	TRUE	14.1986	2.04029	4.71892e-69	0.151557	up	1.73063e-67	All genes
UGP2	UGP2	-0.000695221	1.57885	0.0966683	0.854411	0.449351	0.550649	TRUE	7.62453	1.66533	1.89038e-45	0.0710685	down	2.89557e-44	All genes
RAB1A	RAB1A	0.00353933	1.4107	0.0999319	0.566923	0.410449	0.589551	TRUE	11.2379	2.6635	5.38786e-28	0.0413471	down	4.26379e-27	All genes
PNO1	PNO1	0.000520762	1.29432	0.0980747	0.474339	0.639877	0.360123	TRUE	1.96316	0.713904	1.37178e-72	0.169707	down	5.53717e-71	All genes
PCBP1	PCBP1	-0.00593975	2.06449	0.0914954	0.933309	0.225049	0.774951	TRUE	17.4313	2.55575	1.96699e-58	0.115524	down	4.89307e-57	All genes
SNRPG	SNRPG	-0.00230153	1.47332	0.0949793	0.594499	0.37083	0.62917	TRUE	13.2904	2.85036	2.19411e-30	0.045996	down	1.91329e-29	All genes
CYP26B1	CYP26B1	-0.000769443	1.34091	0.0969347	0.615261	0.845484	0.154516	TRUE	0.157903	0.75168	4.43368e-27	0.174799	down	3.39969e-26	All genes
MTHFD2	MTHFD2	-0.00418034	1.4378	0.0953986	0.656744	0.615365	0.384635	TRUE	2.49791	0.718743	1.90976e-77	0.179216	down	9.35638e-76	All genes
MAT2A	MAT2A	1.58592e-05	2.28334	0.0927652	1.09116	0.276823	0.723177	TRUE	12.2946	1.3384	9.26542e-137	0.328311	down	3.76619e-134	All genes
SFTPB	SFTPB	-0.00195691	1.35064	0.0994899	0.701229	0.73404	0.26596	TRUE	16.3786	2.97476	6.12144e-39	0.0799429	up	7.4408e-38	All genes
LINC00152	LINC00152	-0.000359231	1.87496	0.0984231	1.25273	0.517488	0.482512	TRUE	4.77506	1.04773	9.53889e-70	0.125081	down	3.62252e-68	All genes
EIF5B	EIF5B	0.000974704	1.38787	0.0985821	0.543639	0.475293	0.524707	TRUE	7.13642	1.52744	3.35558e-50	0.0799092	down	6.37163e-49	All genes
FHL2	FHL2	0.000367471	1.98026	0.094775	1.07611	0.391454	0.608546	TRUE	11.0686	2.28607	6.01513e-37	0.056425	down	6.84487e-36	All genes
RANBP2	RANBP2	-0.000481945	1.52048	0.0940259	0.873661	0.50873	0.49127	TRUE	5.09311	1.15831	1.86634e-62	0.107236	down	5.46949e-61	All genes
MIR4435-2HG	MIR4435-2HG	-0.00198339	1.72539	0.0957435	1.07431	0.551872	0.448128	TRUE	2.90492	1.32774	3.36039e-40	0.0655254	down	4.23713e-39	All genes
SLC20A1	SLC20A1	-0.00306473	1.60807	0.0959768	0.833556	0.507338	0.492662	TRUE	5.40897	0.865679	7.79059e-99	0.203103	down	7.24638e-97	All genes
ACTR3	ACTR3	-0.00350757	1.42933	0.0942679	0.606205	0.444765	0.555235	TRUE	8.60518	1.92737	8.47405e-39	0.0592551	down	1.0223e-37	All genes
DDX18	DDX18	-0.00266935	1.40654	0.0971054	0.540448	0.449154	0.550846	TRUE	8.50381	1.75055	5.52278e-46	0.0718177	down	8.66631e-45	All genes
NIFK	NIFK	-0.00354468	1.4154	0.0933189	0.557549	0.488982	0.511018	TRUE	6.5173	1.22138	7.84609e-69	0.117347	down	2.8132e-67	All genes
BIN1	BIN1	-0.00425603	1.30971	0.0961671	0.513881	0.632973	0.367027	TRUE	1.09178	0.979789	1.75691e-51	0.097772	down	3.51272e-50	All genes
RND3	RND3	-0.000126348	1.53312	0.0912193	0.809852	0.488519	0.511481	TRUE	5.85475	1.81147	5.44735e-32	0.0482265	down	5.03037e-31	All genes
TNFAIP6	TNFAIP6	0.00109311	2.36801	0.0923726	1.40273	0.380312	0.619688	TRUE	10.8665	1.91723	4.35141e-51	0.0815006	down	8.59303e-50	All genes
PRPF40A	PRPF40A	-0.00365507	1.28587	0.0984733	0.503351	0.520059	0.479941	TRUE	4.70964	1.8624	3.4343e-27	0.0404558	down	2.65558e-26	All genes
TANC1	TANC1	0.000666085	1.11311	0.098296	0.327488	0.888232	0.111768	TRUE	16.1908	3.90982	1.18624e-24	0.118943	up	8.21283e-24	All genes
CHN1	CHN1	-0.00359306	1.20228	0.098659	0.59384	0.879877	0.120123	TRUE	14.6357	2.92098	1.30568e-40	0.239178	up	1.67932e-39	All genes
HNRNPA3	HNRNPA3	0.000633051	1.63418	0.0970208	0.701319	0.262749	0.737251	TRUE	18.2659	3.30487	1.56724e-36	0.0628193	down	1.75236e-35	All genes
ZC3H15	ZC3H15	-0.00164226	1.40943	0.100203	0.557578	0.416742	0.583258	TRUE	9.82768	1.8515	2.28752e-48	0.0761363	down	3.95723e-47	All genes
SLC40A1	SLC40A1	0.00295942	1.52753	0.0953367	0.815559	0.648273	0.351727	TRUE	12.2279	1.57151	8.493e-92	0.170734	up	6.56724e-90	All genes
NABP1	NABP1	-0.00323947	1.37702	0.101361	0.643579	0.632346	0.367654	TRUE	0.94633	0.95618	3.554e-52	0.100858	down	7.35793e-51	All genes
COQ10B	COQ10B	-0.00323329	1.31732	0.100443	0.548671	0.57202	0.42798	TRUE	3.06885	1.11241	1.14935e-52	0.0917015	down	2.41064e-51	All genes
HSPE1	HSPE1	-0.00707104	2.36065	0.0837122	1.34953	0.196483	0.803517	TRUE	16.1451	2.03633	1.53908e-86	0.200907	down	9.97757e-85	All genes
BZW1	BZW1	-0.010008	1.73802	0.0970351	0.736419	0.248653	0.751347	TRUE	16.76	2.50828	1.37807e-56	0.10629	down	3.23972e-55	All genes
NOP58	NOP58	0.00065855	1.51419	0.0946252	0.631961	0.401894	0.598106	TRUE	9.1467	1.24429	3.71438e-96	0.17415	down	3.1367e-94	All genes
ITM2C	ITM2C	0.00128186	1.41193	0.0966188	0.61919	0.545395	0.454605	TRUE	3.0272	1.77889	1.66707e-25	0.0382033	down	1.19013e-24	All genes
HRH1	HRH1	-0.000507832	1.31738	0.0995875	0.566101	0.739215	0.260785	TRUE	0.448741	0.611611	5.54776e-50	0.183334	down	1.03649e-48	All genes
SH3BP5	SH3BP5	-0.0108148	1.40254	0.0943647	0.588462	0.529342	0.470658	TRUE	4.98251	1.0611	2.45871e-70	0.125551	down	9.39284e-69	All genes
EIF1B	EIF1B	0.00015984	1.99248	0.0908903	1.00085	0.225962	0.774038	TRUE	17.162	2.52123	1.77088e-58	0.113801	down	4.43966e-57	All genes
CTNNB1	CTNNB1	0.00164511	1.46318	0.0919102	0.678221	0.433407	0.566593	TRUE	9.14698	2.17163	6.39659e-33	0.0492857	down	6.18273e-32	All genes
ABHD5	ABHD5	-0.00375233	1.41551	0.0958851	0.625058	0.616906	0.383094	TRUE	1.62658	0.970996	2.54717e-54	0.102542	down	5.65665e-53	All genes
IMPDH2	IMPDH2	-0.00472068	1.41918	0.0937379	0.585343	0.445351	0.554649	TRUE	8.82838	2.02728	3.54624e-36	0.0547707	down	3.89722e-35	All genes
SEMA3B	SEMA3B	-0.000810493	1.33505	0.0973029	0.579847	0.6111	0.3889	TRUE	0.775292	1.24539	5.71204e-38	0.0647064	down	6.66543e-37	All genes
GNL3	GNL3	-0.00280589	1.41903	0.0987574	0.575314	0.495104	0.504896	TRUE	6.17737	1.00861	1.41952e-89	0.167453	down	1.02365e-87	All genes
TKT	TKT	-0.00355626	1.26426	0.0988069	0.47504	0.548559	0.451441	TRUE	3.52247	1.54127	1.45744e-33	0.0522382	down	1.45021e-32	All genes
SELK	SELK	-0.00163716	1.82807	0.0897962	1.01061	0.28193	0.71807	TRUE	13.7209	1.91331	2.64293e-72	0.130478	down	1.06015e-70	All genes
FRMD4B	FRMD4B	0.000371453	1.15705	0.0955407	0.460818	0.839288	0.160712	TRUE	16.4311	3.65501	4.31828e-27	0.0888588	up	3.31913e-26	All genes
ROBO2	ROBO2	-0.00497146	1.48289	0.0961374	0.794477	0.832585	0.167415	TRUE	14.1325	2.25308	9.48869e-68	0.348257	up	3.3097e-66	All genes
PROS1	PROS1	0.000155954	1.34712	0.0966413	0.531809	0.504964	0.495036	TRUE	5.73465	1.85948	3.6549e-30	0.0451601	down	3.15709e-29	All genes
MTRNR2L12	MTRNR2L12	-0.00250974	1.92144	0.0964668	0.828443	0.575461	0.424539	TRUE	3.81101	0.627496	4.47294e-100	0.283342	down	4.48552e-98	All genes
COL8A1	COL8A1	-0.00301833	1.95466	0.0946492	1.151	0.54562	0.45438	TRUE	9.95648	2.02538	3.04859e-41	0.0635648	up	4.0094e-40	All genes
TFG	TFG	-0.00536902	1.34218	0.097287	0.546325	0.483923	0.516077	TRUE	6.79968	2.12911	1.93114e-26	0.0387266	down	1.43616e-25	All genes
TRMT10C	TRMT10C	-0.0018139	1.26791	0.0978028	0.440723	0.620764	0.379236	TRUE	1.52397	1.04909	2.25635e-49	0.089669	down	4.03377e-48	All genes
CBLB	CBLB	-0.00401402	1.62225	0.0968241	0.789721	0.424515	0.575485	TRUE	8.07636	1.13307	8.64933e-98	0.179794	down	7.81851e-96	All genes
NAA50	NAA50	-0.00148611	1.33071	0.0969758	0.536748	0.527472	0.472528	TRUE	4.84757	1.32013	2.87625e-49	0.0805123	down	5.12772e-48	All genes
MYLK	MYLK	0.00125086	1.41516	0.0974693	0.721759	0.694729	0.305271	TRUE	13.0781	1.60949	4.30811e-99	0.206945	up	4.12678e-97	All genes
RAB7A	RAB7A	-0.00732642	1.54708	0.0923569	0.67959	0.324142	0.675858	TRUE	15.7718	3.22638	2.16833e-30	0.0474397	down	1.89338e-29	All genes
MRPL3	MRPL3	0.000995239	1.24787	0.0980675	0.434856	0.59955	0.40045	TRUE	1.26008	1.39338	2.37545e-33	0.0541154	down	2.33113e-32	All genes
RBP1	RBP1	-0.0100805	1.34645	0.0991437	0.544187	0.531037	0.468963	TRUE	3.95623	1.98167	7.1323e-23	0.0334226	down	4.49216e-22	All genes
WWTR1	WWTR1	-0.00233344	1.40683	0.0964265	0.626293	0.54514	0.45486	TRUE	3.49197	1.489	2.16805e-35	0.0556216	down	2.31139e-34	All genes
TSC22D2	TSC22D2	-0.00216521	1.32589	0.0958655	0.584729	0.635817	0.364183	TRUE	0.390056	1.07353	1.50084e-44	0.0820092	down	2.22972e-43	All genes
DHX36	DHX36	-0.00171715	1.30752	0.0981905	0.462675	0.520226	0.479774	TRUE	4.93315	2.09194	1.10504e-22	0.0328854	down	6.90571e-22	All genes
TIPARP	TIPARP	-0.00564528	1.54981	0.0936942	0.808371	0.549867	0.450133	TRUE	4.12766	0.876182	7.80995e-81	0.160437	down	4.35863e-79	All genes
CCNL1	CCNL1	-0.00487725	1.69528	0.0931851	0.745525	0.252925	0.747075	TRUE	15.9	2.28103	1.70827e-63	0.119709	down	5.12322e-62	All genes
PTX3	PTX3	-0.000822981	2.93538	0.0982346	1.69192	0.719107	0.280893	TRUE	0.47833	0.63882	1.20024e-55	0.175125	down	2.73162e-54	All genes
LXN	LXN	-0.00354024	1.59402	0.0935569	0.791621	0.493731	0.506269	TRUE	5.97266	1.84517	2.39611e-31	0.047093	down	2.16901e-30	All genes
RPL22L1	RPL22L1	-0.00618491	1.6546	0.0911524	0.779532	0.343122	0.656878	TRUE	12.9687	2.24297	2.19192e-47	0.076449	down	3.65396e-46	All genes
EIF4G1	EIF4G1	-0.00158023	1.31778	0.0957825	0.515845	0.511523	0.488477	TRUE	5.58091	1.38512	1.7399e-49	0.0799543	down	3.15443e-48	All genes
MAGEF1	MAGEF1	-0.00296314	1.09246	0.093924	0.26146	0.846933	0.153067	TRUE	18.427	4.88609	3.85298e-18	0.0568509	up	1.95173e-17	All genes
TRA2B	TRA2B	-0.00396624	1.36812	0.0959322	0.52136	0.441643	0.558357	TRUE	9.56258	2.51004	3.29334e-26	0.0382256	down	2.4295e-25	All genes
ATP13A3	ATP13A3	-0.0118155	1.43101	0.0963564	0.662819	0.567705	0.432295	TRUE	3.80825	0.757348	1.86873e-89	0.199446	down	1.33261e-87	All genes
SPON2	SPON2	0.00101437	1.85627	0.0946942	0.945388	0.333782	0.666218	TRUE	15.2301	3.24674	1.66316e-28	0.0436802	down	1.35287e-27	All genes
SLBP	SLBP	0.000244548	1.27351	0.0985075	0.467601	0.559124	0.440876	TRUE	3.39113	1.36672	3.70734e-40	0.0647685	down	4.65631e-39	All genes
GRPEL1	GRPEL1	-0.00465695	1.31206	0.0962899	0.517892	0.603845	0.396155	TRUE	2.55858	0.898384	1.04982e-64	0.126231	down	3.33553e-63	All genes
HTRA3	HTRA3	-0.00266503	1.80391	0.094421	1.11524	0.517442	0.482558	TRUE	4.14894	1.66871	3.94249e-31	0.0474845	down	3.54382e-30	All genes
WDR1	WDR1	-0.00206822	1.40348	0.0971009	0.593577	0.495828	0.504172	TRUE	6.10933	1.28275	4.39544e-60	0.100027	down	1.17541e-58	All genes
C1QTNF7	C1QTNF7	-0.00211893	1.1934	0.101012	0.483979	0.849957	0.150043	TRUE	16.5778	3.81391	1.70887e-25	0.0894367	up	1.21726e-24	All genes
DHX15	DHX15	-0.00055954	1.28243	0.0981485	0.468358	0.56265	0.43735	TRUE	3.65902	1.15895	7.52737e-53	0.0903417	down	1.59441e-51	All genes
UGDH	UGDH	-0.00327014	2.49468	0.0905732	1.43382	0.310143	0.689857	TRUE	11.001	1.2008	1.83678e-139	0.313231	down	9.8237e-137	All genes
LIMCH1	LIMCH1	0.00739702	1.63548	0.0946873	0.856215	0.694744	0.305256	TRUE	13.1415	1.62197	2.53508e-98	0.204369	up	2.32431e-96	All genes
TMEM165	TMEM165	0.000655777	1.48366	0.0965499	0.609525	0.3762	0.6238	TRUE	12.9543	2.80413	2.60019e-30	0.0457304	down	2.25514e-29	All genes
HOPX	HOPX	-0.000355827	1.19049	0.0993997	0.563341	0.893008	0.106992	TRUE	17.8559	5.58884	9.8869e-14	0.0641859	up	3.94615e-13	All genes
CXCL2	CXCL2	0.00404202	2.80104	0.0917947	1.76388	0.615414	0.384586	TRUE	2.38067	0.739266	6.32695e-75	0.169106	down	2.70709e-73	All genes
PDLIM5	PDLIM5	-0.00149324	1.43436	0.0956255	0.69596	0.500568	0.499432	TRUE	5.26177	1.97212	6.12086e-26	0.0381981	down	4.45393e-25	All genes
EIF4E	EIF4E	-0.00121538	1.39974	0.0952197	0.661143	0.460523	0.539477	TRUE	7.14747	1.34404	2.83606e-63	0.104925	down	8.46597e-62	All genes
NPNT	NPNT	0.00292938	1.42079	0.0984146	0.69359	0.870421	0.129579	TRUE	14.6423	2.89598	5.01423e-47	0.453378	up	8.16785e-46	All genes
CCDC109B	CCDC109B	-0.00550257	1.27047	0.0984044	0.476703	0.645415	0.354585	TRUE	0.8358	0.930741	4.42724e-53	0.104614	down	9.43988e-52	All genes
CFI	CFI	-0.00470894	1.58222	0.0923662	0.710397	0.362489	0.637511	TRUE	11.651	1.91513	3.37021e-56	0.091737	down	7.78057e-55	All genes
PDE5A	PDE5A	-0.0020556	1.20231	0.0976747	0.446403	0.798923	0.201077	TRUE	15.7125	2.91146	1.24653e-39	0.107022	up	1.54445e-38	All genes
NDNF	NDNF	-0.00152286	1.25439	0.0969695	0.677191	0.756037	0.243963	TRUE	16.8198	3.34306	3.75383e-32	0.0716667	up	3.48655e-31	All genes
ARHGAP10	ARHGAP10	-0.0024165	1.28959	0.0972114	0.499169	0.609934	0.390066	TRUE	0.364514	1.43744	1.18065e-30	0.0497951	down	1.04516e-29	All genes
SFRP2	SFRP2	-0.00649678	4.1052	0.0971306	1.58213	0.204403	0.795597	TRUE	17.8003	2.44494	5.28296e-68	0.15344	down	1.86297e-66	All genes
NAF1	NAF1	-0.00231268	1.3106	0.0949371	0.68764	0.672724	0.327276	TRUE	0.0201685	0.781477	3.34744e-56	0.130462	down	7.75591e-55	All genes
MRPL36	MRPL36	-0.000966023	1.25423	0.0960589	0.440441	0.60197	0.39803	TRUE	1.07245	1.40331	1.08476e-32	0.0530295	down	1.03755e-31	All genes
CCT5	CCT5	-0.00594708	1.33372	0.100194	0.518751	0.511206	0.488794	TRUE	5.63368	1.40559	1.44262e-48	0.0781451	down	2.51551e-47	All genes
C1QTNF3	C1QTNF3	-0.00241007	1.64451	0.0943758	0.86947	0.628117	0.371883	TRUE	1.68417	0.786346	4.18648e-66	0.143149	down	1.3639e-64	All genes
BRIX1	BRIX1	-0.00489379	1.27466	0.0947945	0.449049	0.601769	0.398231	TRUE	2.42908	1.00689	3.61286e-56	0.102893	down	8.31087e-55	All genes
DAB2	DAB2	-0.00838845	1.53218	0.0921628	0.681346	0.376582	0.623418	TRUE	13.6672	3.30627	1.14567e-23	0.0347282	down	7.52601e-23	All genes
FST	FST	0.0041778	2.77583	0.0941368	1.6418	0.559944	0.440056	TRUE	4.02671	0.81833	7.42974e-86	0.179316	down	4.76841e-84	All genes
ZSWIM6	ZSWIM6	-0.00288477	1.23819	0.0967586	0.480024	0.721967	0.278033	TRUE	0.00341869	0.743077	1.51657e-51	0.142843	down	3.04166e-50	All genes
DIMT1	DIMT1	-0.0101572	1.23205	0.0982832	0.420272	0.618797	0.381203	TRUE	1.45869	1.08763	4.69424e-47	0.0840831	down	7.66606e-46	All genes
PIK3R1	PIK3R1	0.00129089	1.39346	0.0973069	0.681032	0.579859	0.420141	TRUE	12.5069	2.8026	5.61986e-29	0.0433028	up	4.63603e-28	All genes
MAP1B	MAP1B	0.000863668	1.42427	0.0942751	0.696534	0.567868	0.432132	TRUE	1.18531	1.75349	1.86287e-23	0.0354478	down	1.21257e-22	All genes
ENC1	ENC1	0.00108646	1.31284	0.0996681	0.710868	0.799549	0.200451	TRUE	16.8592	3.6143	2.84086e-28	0.0767412	up	2.27908e-27	All genes
ELL2	ELL2	-0.000587055	1.63243	0.0922094	0.889673	0.519421	0.480579	TRUE	4.97645	0.983261	2.179e-78	0.145773	down	1.1099e-76	All genes
CHD1	CHD1	0.00161645	1.73152	0.0951119	0.806122	0.410847	0.589153	TRUE	8.33352	1.0157	7.7273e-124	0.253383	down	1.83681e-121	All genes
2023-03-03	2023-03-03	-0.00440293	1.47222	0.0975676	0.645838	0.605263	0.394737	TRUE	3.01238	0.637524	3.07911e-88	0.23404	down	2.12492e-86	All genes
PDLIM4	PDLIM4	-0.00206505	1.72518	0.0997955	0.748711	0.405	0.595	TRUE	8.94895	1.17241	1.05701e-104	0.195536	down	1.30459e-102	All genes
AFF4	AFF4	-0.00310223	1.47112	0.0974906	0.631204	0.376304	0.623696	TRUE	12.7941	2.7564	7.84653e-31	0.0465587	down	7.00404e-30	All genes
HSPA4	HSPA4	0.00649601	1.31776	0.096491	0.618319	0.581212	0.418788	TRUE	1.97711	1.26101	3.01975e-40	0.0671816	down	3.82263e-39	All genes
PPP2CA	PPP2CA	-0.00212919	1.27642	0.0969396	0.48777	0.538848	0.461152	TRUE	4.09824	1.55603	8.11886e-35	0.054085	down	8.43153e-34	All genes
HNRNPA0	HNRNPA0	-0.0104268	1.84022	0.0947683	0.791301	0.227268	0.772732	TRUE	18.1669	2.84127	7.22067e-50	0.0954262	down	1.33567e-48	All genes
ETF1	ETF1	-0.00321554	1.52936	0.0947417	0.671175	0.452506	0.547494	TRUE	7.33289	1.04722	2.8989e-100	0.18913	down	3.00083e-98	All genes
HSPA9	HSPA9	0.000331892	1.51806	0.0947944	0.664908	0.420093	0.579907	TRUE	8.73336	1.34021	1.25657e-78	0.134929	down	6.55663e-77	All genes
CTNNA1	CTNNA1	-0.00480164	1.37126	0.0936574	0.530426	0.478762	0.521238	TRUE	7.45613	2.42557	2.42769e-22	0.0320096	down	1.49386e-21	All genes
TAF7	TAF7	-0.00305824	1.30921	0.0982947	0.488863	0.574377	0.425623	TRUE	2.08506	1.5669	2.49602e-29	0.0455679	down	2.08859e-28	All genes
SCGB3A2	SCGB3A2	-0.00206242	1.28593	0.0941092	0.906505	0.730445	0.269555	TRUE	15.7017	2.74144	3.59934e-43	0.0933353	up	5.06592e-42	All genes
CSNK1A1	CSNK1A1	-0.00275576	1.60489	0.0945017	0.680501	0.288326	0.711674	TRUE	17.3424	3.28885	6.95806e-34	0.0557298	down	7.03257e-33	All genes
G3BP1	G3BP1	-0.010555	1.45593	0.093584	0.60221	0.428198	0.571802	TRUE	9.14649	1.76877	1.06489e-48	0.0766394	down	1.86734e-47	All genes
CLINT1	CLINT1	-0.00498836	1.24611	0.0988806	0.440122	0.606878	0.393122	TRUE	0.0241538	1.62155	1.75922e-25	0.0399144	down	1.25174e-24	All genes
NPM1	NPM1	0.86269	3.0242	0.739018	1.01479	0.235088	0.764912	TRUE	18.1586	2.51995	4.64032e-66	0.151368	down	1.50412e-64	All genes
DUSP1	DUSP1	1.03967	3.99708	0.853464	1.1522	0.230089	0.769911	TRUE	17.3098	2.28736	1.15645e-75	0.178575	down	5.26389e-74	All genes
NOP16	NOP16	0.00304528	1.57232	0.0952089	0.675974	0.501059	0.498941	TRUE	5.50318	0.720175	1.50856e-121	0.318974	down	3.12321e-119	All genes
CLTB	CLTB	-0.00469173	1.46571	0.0953326	0.635826	0.362459	0.637541	TRUE	12.6448	2.36794	5.53148e-41	0.0643307	down	7.23036e-40	All genes
PRELID1	PRELID1	-0.00175402	1.45943	0.0928506	0.592482	0.387764	0.612236	TRUE	11.8879	2.41604	2.86445e-36	0.0555605	down	3.15335e-35	All genes
NHP2	NHP2	-0.00578773	1.334	0.0960263	0.506122	0.459314	0.540686	TRUE	8.742	2.6272	4.55963e-22	0.0315303	down	2.78437e-21	All genes
HNRNPAB	HNRNPAB	-0.00196947	1.74791	0.0929613	0.731748	0.361961	0.638039	TRUE	10.3444	1.27539	1.8621e-109	0.208763	down	2.84547e-107	All genes
HNRNPH1	HNRNPH1	-0.00281449	1.37101	0.0968885	0.55257	0.483895	0.516105	TRUE	6.7699	1.52444	3.35631e-48	0.0764661	down	5.74421e-47	All genes
GFPT2	GFPT2	-0.00581885	2.2534	0.0963007	1.04301	0.324146	0.675854	TRUE	10.2388	1.06328	3.391e-160	0.466257	down	1.08817e-156	All genes
MGAT1	MGAT1	0.000562788	1.31613	0.099244	0.491928	0.520036	0.479964	TRUE	5.12029	1.63584	2.07367e-35	0.0544856	down	2.21813e-34	All genes
TUBB2A	TUBB2A	0.00525432	1.84082	0.0947387	0.947761	0.451444	0.548556	TRUE	7.14164	0.998514	2.65288e-105	0.204398	down	3.47473e-103	All genes
TUBB2B	TUBB2B	-0.00506925	1.55532	0.0950553	0.839316	0.779512	0.220488	TRUE	0.0267076	0.73093	6.10748e-39	0.158277	down	7.43792e-38	All genes
IER3	IER3	-0.00297368	2.26896	0.0921797	1.36775	0.383126	0.616874	TRUE	11.1065	2.19396	3.22303e-40	0.0621182	down	4.07193e-39	All genes
HSPA1A	HSPA1A	0.474666	3.19685	0.599794	1.79377	0.330224	0.669776	TRUE	12.5012	2.412	6.83832e-39	0.060485	down	8.26522e-38	All genes
HSPA1B	HSPA1B	0.00401974	2.53543	0.0922952	1.63002	0.331536	0.668464	TRUE	13.5623	2.45487	4.43241e-42	0.0671264	down	6.01421e-41	All genes
BRD2	BRD2	-0.00293476	1.56003	0.0945258	0.723737	0.413281	0.586719	TRUE	9.86564	1.9877	2.52723e-42	0.0654337	down	3.45101e-41	All genes
KCTD20	KCTD20	0.000894223	1.32734	0.0955815	0.564388	0.606125	0.393875	TRUE	1.93519	1.0139	3.4294e-53	0.0976463	down	7.38586e-52	All genes
CDKN1A	CDKN1A	0.00245372	2.98335	0.100509	1.40349	0.285486	0.714514	TRUE	12.0471	1.29674	8.44465e-142	0.349533	down	5.41977e-139	All genes
MTCH1	MTCH1	-0.0025209	1.46903	0.095413	0.592015	0.368088	0.631912	TRUE	13.6335	2.95676	2.78241e-29	0.044242	down	2.3252e-28	All genes
PIM1	PIM1	-0.00141632	1.9694	0.0968869	1.04153	0.500097	0.499903	TRUE	5.68849	0.883495	1.57567e-100	0.204766	down	1.65781e-98	All genes
MDFI	MDFI	0.000357473	1.13669	0.098835	0.403853	0.886787	0.113213	TRUE	16.0839	3.95938	2.02632e-23	0.110667	up	1.31762e-22	All genes
POLR1C	POLR1C	-0.0003451	1.23482	0.0979115	0.407097	0.666328	0.333672	TRUE	0.543293	0.841655	2.65647e-56	0.119973	down	6.19972e-55	All genes
VEGFA	VEGFA	-0.00368219	1.61619	0.0946395	0.810968	0.5037	0.4963	TRUE	5.49724	0.822644	1.42549e-106	0.230889	down	2.03307e-104	All genes
ELOVL5	ELOVL5	-0.00354655	1.41298	0.0927651	0.642545	0.468854	0.531146	TRUE	6.92822	1.28852	2.97295e-66	0.111234	down	9.7349e-65	All genes
BMP5	BMP5	-0.00246261	1.46103	0.100887	0.770378	0.847898	0.152102	TRUE	14.5418	2.89667	1.07227e-47	0.545014	up	1.80625e-46	All genes
PTP4A1	PTP4A1	-0.00201875	1.56321	0.0943028	0.791312	0.424528	0.575472	TRUE	8.1653	1.21486	2.93137e-87	0.154478	down	1.95975e-85	All genes
FAM46A	FAM46A	-0.00744424	1.6573	0.09548	0.911239	0.552972	0.447028	TRUE	3.21126	1.25836	8.86468e-45	0.0742747	down	1.32619e-43	All genes
SYNCRIP	SYNCRIP	-0.00508151	1.43928	0.092472	0.594512	0.429388	0.570612	TRUE	8.89289	1.58248	1.92465e-58	0.0945738	down	4.80637e-57	All genes
PNRC1	PNRC1	0.599053	2.87289	0.621739	1.17778	0.166376	0.833624	TRUE	17.6198	2.48957	1.65415e-63	0.133518	down	4.98421e-62	All genes
UBE2J1	UBE2J1	-0.000853177	1.27964	0.0979043	0.449075	0.568681	0.431319	TRUE	2.73528	1.47656	1.10915e-33	0.0531255	down	1.10708e-32	All genes
AMD1	AMD1	0.000433414	1.63995	0.0963512	0.69301	0.459786	0.540214	TRUE	7.08391	0.958882	2.68545e-111	0.223146	down	4.53558e-109	All genes
RPF2	RPF2	-0.00104971	1.21382	0.0971221	0.415072	0.641471	0.358529	TRUE	0.844914	0.988174	4.26758e-50	0.0952751	down	8.03206e-49	All genes
HDAC2	HDAC2	0.000843883	1.29099	0.0964509	0.463104	0.54898	0.45102	TRUE	3.02434	1.9094	1.13037e-22	0.0333536	down	7.05714e-22	All genes
GJA1	GJA1	0.00165181	1.47661	0.094256	0.750511	0.552003	0.447997	TRUE	3.80756	1.0278	1.48348e-63	0.114597	down	4.5123e-62	All genes
SMPDL3A	SMPDL3A	-0.000424194	1.24497	0.0967923	0.522976	0.772266	0.227734	TRUE	17.4935	3.65734	8.74142e-29	0.0652476	up	7.17422e-28	All genes
SGK1	SGK1	-0.00224833	2.24245	0.094909	1.37072	0.513583	0.486417	TRUE	5.22358	0.905502	9.637e-91	0.178915	down	7.27651e-89	All genes
AKAP12	AKAP12	0.00143216	1.91896	0.0887096	0.989752	0.309876	0.690124	TRUE	13.1506	1.91959	6.02028e-67	0.116357	down	2.00198e-65	All genes
SNX9	SNX9	-0.00103705	1.40852	0.0917611	0.607242	0.462614	0.537386	TRUE	7.76455	1.87516	4.35013e-37	0.0564197	down	4.97667e-36	All genes
WTAP	WTAP	0.00214739	1.49443	0.0920164	0.7522	0.440841	0.559159	TRUE	8.14147	1.68849	4.00007e-47	0.073914	down	6.56584e-46	All genes
TCP1	TCP1	-0.0048527	1.49126	0.0925529	0.687979	0.458006	0.541994	TRUE	7.27212	1.2148	5.86961e-77	0.133212	down	2.81128e-75	All genes
SMOC2	SMOC2	-0.00413656	1.47332	0.0983046	0.693238	0.645684	0.354316	TRUE	0.761307	0.891267	7.81867e-55	0.11137	down	1.74237e-53	All genes
BZW2	BZW2	-0.00216197	1.27066	0.0980135	0.478054	0.632902	0.367098	TRUE	1.15343	0.974239	4.90412e-52	0.0989977	down	1.00558e-50	All genes
FAM126A	FAM126A	-0.00120473	1.29063	0.0967587	0.481653	0.608552	0.391448	TRUE	1.21058	1.26466	4.19193e-38	0.0640955	down	4.93648e-37	All genes
CYCS	CYCS	-0.00222282	1.9278	0.0923663	0.957874	0.345337	0.654663	TRUE	10.8164	1.3671	1.72174e-101	0.189264	down	1.87291e-99	All genes
INMT	INMT	-0.000202752	1.17709	0.0984453	0.534214	0.836197	0.163803	TRUE	16.3099	3.58686	6.51506e-28	0.092747	up	5.14947e-27	All genes
MRPL32	MRPL32	3.92584e-05	1.27429	0.0955623	0.48279	0.556479	0.443521	TRUE	3.83265	1.22096	7.68876e-50	0.0835048	down	1.41394e-48	All genes
STK17A	STK17A	0.000929526	1.47792	0.0996703	0.661781	0.545076	0.454924	TRUE	4.29107	1.0639	3.22199e-64	0.11401	down	1.00382e-62	All genes
SNHG15	SNHG15	0.00353206	1.33604	0.0973023	0.545499	0.550925	0.449075	TRUE	4.31235	0.918461	2.40424e-78	0.150882	down	1.21499e-76	All genes
CCT6A	CCT6A	0.000416534	1.45526	0.0962571	0.584296	0.443668	0.556332	TRUE	8.73815	1.79326	3.56187e-45	0.0703622	down	5.39153e-44	All genes
RABGEF1	RABGEF1	-0.00496028	1.38349	0.0994092	0.634866	0.632223	0.367777	TRUE	2.14644	0.651523	1.938e-77	0.197955	down	9.42278e-76	All genes
SBDS	SBDS	-0.00430781	1.5824	0.0995275	0.647928	0.309414	0.690586	TRUE	18.4832	4.2298	9.02057e-23	0.0351357	down	5.6482e-22	All genes
EIF4H	EIF4H	0.000361482	1.36883	0.0972725	0.519591	0.463333	0.536667	TRUE	8.18334	2.1285	1.02899e-30	0.045628	down	9.12161e-30	All genes
YWHAG	YWHAG	-0.00353834	1.61516	0.0926961	0.766845	0.411909	0.588091	TRUE	8.47165	1.13171	4.84581e-104	0.194706	down	5.75933e-102	All genes
GNAI1	GNAI1	0.00256391	1.18132	0.100701	0.422077	0.835581	0.164419	TRUE	15.1884	2.88307	1.2709e-39	0.135052	up	1.5716e-38	All genes
STEAP2	STEAP2	-0.00524911	1.53198	0.0948173	0.708797	0.410128	0.589872	TRUE	11.2203	2.90922	1.2772e-23	0.0341732	down	8.36437e-23	All genes
GNG11	GNG11	-0.00608927	1.54638	0.0923731	0.724181	0.409026	0.590974	TRUE	9.94509	1.97863	4.26497e-43	0.0668028	down	5.97655e-42	All genes
PDK4	PDK4	0.00261804	1.62295	0.0985544	1.03583	0.620502	0.379498	TRUE	16.4655	3.81888	2.69928e-23	0.0350687	up	1.74285e-22	All genes
GNB2	GNB2	-0.00193899	1.55491	0.0969408	0.652896	0.34343	0.65657	TRUE	15.8884	3.63152	2.28433e-24	0.0366999	down	1.55801e-23	All genes
SERPINE1	SERPINE1	-0.00170752	2.5103	0.0923866	1.40142	0.478017	0.521983	TRUE	6.73857	1.55243	1.75535e-46	0.0733458	down	2.80944e-45	All genes
DNAJC2	DNAJC2	-0.00240061	1.33866	0.0988852	0.494448	0.598871	0.401129	TRUE	2.86759	0.900076	7.0533e-67	0.130049	down	2.32144e-65	All genes
NAMPT	NAMPT	-0.00110032	2.24436	0.0933928	1.07769	0.27054	0.72946	TRUE	12.6593	1.40079	7.58154e-130	0.303476	down	2.31706e-127	All genes
PNPLA8	PNPLA8	0.00386517	1.34621	0.0991775	0.579788	0.541192	0.458808	TRUE	4.3594	1.12371	8.04994e-60	0.103649	down	2.1349e-58	All genes
DNAJB9	DNAJB9	-0.00222657	1.33946	0.0941812	0.603562	0.58659	0.41341	TRUE	0.903371	1.55858	8.50218e-28	0.0436303	down	6.71181e-27	All genes
IFRD1	IFRD1	-0.00625858	1.34693	0.0936489	0.57872	0.560048	0.439952	TRUE	1.81746	1.89645	2.63555e-21	0.031416	down	1.55755e-20	All genes
CAPZA2	CAPZA2	0.0016208	1.40301	0.0968548	0.552283	0.41548	0.58452	TRUE	11.3339	2.90518	5.82057e-24	0.0347427	down	3.89129e-23	All genes
AC090498.1	AC090498.1	0.947864	4.11589	0.814307	1.46688	0.485404	0.514596	TRUE	6.29323	0.881139	5.48353e-111	0.232365	up	9.02393e-109	All genes
RHEB	RHEB	-0.00622385	1.59434	0.0976576	0.657607	0.311322	0.688678	TRUE	15.7178	2.892	1.17692e-37	0.0611409	down	1.36838e-36	All genes
INSIG1	INSIG1	-0.00492781	1.62143	0.0939168	1.01852	0.641817	0.358183	TRUE	0.689133	0.842915	5.88776e-57	0.120551	down	1.39954e-55	All genes
DNAJB6	DNAJB6	-0.00784814	1.40693	0.0952208	0.618044	0.46009	0.53991	TRUE	7.62509	1.69484	5.29674e-44	0.0684943	down	7.65642e-43	All genes
ESYT2	ESYT2	0.00152486	1.24955	0.100291	0.456637	0.614559	0.385441	TRUE	1.90865	0.972451	1.2558e-55	0.104445	down	2.84797e-54	All genes
EGFL6	EGFL6	-0.00423283	1.53026	0.100348	0.916499	0.868017	0.131983	TRUE	14.8296	2.92411	4.76286e-40	0.200115	up	5.94709e-39	All genes
SYAP1	SYAP1	-0.00383052	1.29065	0.0988994	0.565468	0.606924	0.393076	TRUE	0.363706	1.38615	2.94401e-32	0.0531024	down	2.75432e-31	All genes
EIF1AX	EIF1AX	0.00061052	1.59969	0.0918117	0.664854	0.311786	0.688214	TRUE	14.8728	2.53122	2.07379e-45	0.0752636	down	3.16894e-44	All genes
SMS	SMS	-0.00649652	1.37491	0.0978053	0.677832	0.553477	0.446523	TRUE	1.78766	1.88211	1.5475e-21	0.0318247	down	9.26479e-21	All genes
SRPX	SRPX	-0.00309701	1.79321	0.093483	0.910764	0.372076	0.627924	TRUE	13.6526	3.35417	5.42214e-23	0.0336002	down	3.43867e-22	All genes
DDX3X	DDX3X	-0.00373023	1.63476	0.096393	0.721049	0.355272	0.644728	TRUE	11.5279	1.72139	6.5034e-69	0.116817	down	2.34488e-67	All genes
MAOB	MAOB	0.00313185	1.15876	0.0987952	0.408194	0.87965	0.12035	TRUE	14.3908	2.73642	1.71383e-45	0.268537	up	2.64407e-44	All genes
RGN	RGN	-0.00194133	1.14803	0.0991081	0.426431	0.850516	0.149484	TRUE	16.5479	3.74361	1.53015e-26	0.0938288	up	1.15129e-25	All genes
SLC38A5	SLC38A5	-0.00342821	1.20577	0.0983747	0.400194	0.848196	0.151804	TRUE	15.7138	3.17904	1.09118e-34	0.125698	up	1.12411e-33	All genes
TSPYL2	TSPYL2	-0.0011719	1.26816	0.0935914	0.493639	0.616478	0.383522	TRUE	0.133461	1.40777	2.52548e-31	0.0514793	down	2.28289e-30	All genes
ITM2A	ITM2A	-0.00338974	1.59473	0.098935	0.740474	0.541014	0.458986	TRUE	4.55056	0.92697	5.39532e-80	0.153511	down	2.95958e-78	All genes
RPL36A	RPL36A	0.000101568	1.54138	0.0968435	0.746904	0.366736	0.633264	TRUE	13.1137	2.88661	4.08129e-29	0.0437473	down	3.38858e-28	All genes
MORF4L2	MORF4L2	-0.00324564	1.61621	0.0919958	0.72023	0.332533	0.667467	TRUE	14.7714	2.86016	4.76477e-35	0.0552175	down	5.00495e-34	All genes
ACSL4	ACSL4	-0.00308411	2.27902	0.0931467	1.23655	0.390937	0.609063	TRUE	8.48209	0.963347	2.4683e-139	0.312012	down	1.21858e-136	All genes
CHRDL1	CHRDL1	-0.000870514	1.83756	0.0931641	0.863436	0.314292	0.685708	TRUE	14.0492	2.28873	3.15469e-51	0.085527	down	6.26835e-50	All genes
LONRF3	LONRF3	-0.000394922	1.18312	0.0997494	0.389858	0.885274	0.114726	TRUE	0.115286	0.863368	6.08589e-21	0.175722	down	3.5252e-20	All genes
UBE2A	UBE2A	0.0016933	1.30596	0.0944011	0.475524	0.558229	0.441771	TRUE	3.04035	1.59092	1.2286e-30	0.0472753	down	1.08611e-29	All genes
GPC3	GPC3	0.000447701	1.59984	0.0952782	0.870998	0.626954	0.373046	TRUE	15.1679	3.0864	2.58359e-31	0.0486912	up	2.33214e-30	All genes
EMD	EMD	-0.00333419	1.45838	0.0940536	0.606823	0.378387	0.621613	TRUE	11.7243	2.173	6.07424e-44	0.0690374	down	8.74091e-43	All genes
PDGFRL	PDGFRL	-0.00101762	1.79275	0.0951877	0.827397	0.420908	0.579092	TRUE	8.18454	1.07093	4.96977e-110	0.211865	down	7.97399e-108	All genes
CSGALNACT1	CSGALNACT1	-0.00149764	1.14915	0.100385	0.413172	0.89241	0.10759	TRUE	17.5027	4.97015	4.75181e-17	0.0802344	up	2.25905e-16	All genes
SFTPC	SFTPC	-0.00274523	3.21784	0.100578	1.41055	0.672654	0.327346	TRUE	13.5346	1.93235	3.72623e-69	0.122486	up	1.3904e-67	All genes
PPP2R2A	PPP2R2A	-0.000865575	1.24945	0.10099	0.427533	0.624389	0.375611	TRUE	0.134714	1.34748	2.92747e-33	0.0555893	down	2.85539e-32	All genes
SFRP1	SFRP1	0.00159412	1.84658	0.0963791	0.91884	0.55921	0.44079	TRUE	4.09475	0.690282	5.15892e-100	0.250155	down	5.09384e-98	All genes
CYP7B1	CYP7B1	-0.00264845	1.20561	0.101347	0.585858	0.824727	0.175273	TRUE	17.5537	4.22839	4.29851e-22	0.0654676	up	2.62741e-21	All genes
TCEB1	TCEB1	0.0012873	1.80359	0.0894128	0.912237	0.305023	0.694977	TRUE	12.8974	1.77607	1.0226e-76	0.137394	down	4.82578e-75	All genes
TMEM70	TMEM70	0.000772253	1.38325	0.0965515	0.638499	0.557976	0.442024	TRUE	3.19294	1.26628	2.75558e-44	0.0732986	down	4.04699e-43	All genes
RUNX1T1	RUNX1T1	-0.00410383	1.18366	0.0978065	0.413701	0.803173	0.196827	TRUE	16.5784	3.33528	1.16044e-32	0.0873387	up	1.10665e-31	All genes
GEM	GEM	0.000230459	2.44026	0.093317	1.35937	0.346232	0.653768	TRUE	15.5162	3.72051	1.77469e-22	0.0332806	down	1.10048e-21	All genes
SDC2	SDC2	-0.000308603	1.51198	0.0975463	0.791474	0.506213	0.493787	TRUE	4.88874	1.76001	1.69597e-30	0.046033	down	1.48698e-29	All genes
DCAF13	DCAF13	0.00146265	1.27179	0.0982661	0.45995	0.626377	0.373623	TRUE	1.94651	0.841765	1.98533e-64	0.132118	down	6.27678e-63	All genes
EIF3H	EIF3H	-0.00294978	1.48298	0.092163	0.641184	0.372051	0.627949	TRUE	13.8971	3.32685	6.47236e-24	0.0352067	down	4.31356e-23	All genes
ENPP2	ENPP2	0.000746581	1.22239	0.100581	0.501276	0.823491	0.176509	TRUE	15.3406	2.85928	7.81031e-41	0.13128	up	1.01471e-39	All genes
HAS2	HAS2	0.00133406	1.88654	0.0989294	1.09151	0.626563	0.373437	TRUE	0.88939	0.982349	1.45296e-50	0.0963742	down	2.80034e-49	All genes
TRIB1	TRIB1	-0.00177138	1.45708	0.0953645	0.674887	0.628302	0.371698	TRUE	1.96	0.74147	5.62048e-71	0.160474	down	2.16001e-69	All genes
PVT1	PVT1	-0.0019457	1.1734	0.0968865	0.382572	0.798259	0.201741	TRUE	0.0989384	0.747227	2.20476e-37	0.158964	down	2.53587e-36	All genes
NDRG1	NDRG1	0.00128714	1.30856	0.10138	0.549582	0.610065	0.389935	TRUE	2.10755	0.916168	1.94718e-60	0.117079	down	5.29535e-59	All genes
ARC	ARC	-0.0017329	2.20422	0.0983253	1.41831	0.719883	0.280117	TRUE	0.938304	0.508643	4.04323e-55	0.232829	down	9.13714e-54	All genes
PUF60	PUF60	-0.00209995	1.24452	0.097289	0.407795	0.583286	0.416714	TRUE	1.48233	1.65471	4.89178e-26	0.0399416	down	3.57172e-25	All genes
PUM3	PUM3	-0.00437302	1.25639	0.0977947	0.443952	0.624546	0.375454	TRUE	0.273087	1.30185	5.26436e-35	0.0591523	down	5.50272e-34	All genes
IL33	IL33	-0.00272813	1.35098	0.0971951	0.601325	0.607354	0.392646	TRUE	0.174317	1.43507	1.55821e-30	0.0497874	down	1.36994e-29	All genes
LURAP1L	LURAP1L	-0.0021885	1.23101	0.0961327	0.41939	0.876405	0.123595	TRUE	15.0356	3.05367	6.58012e-37	0.177168	up	7.47455e-36	All genes
PLIN2	PLIN2	-0.000801606	1.92888	0.0944857	1.19658	0.475189	0.524811	TRUE	6.29917	1.02391	4.30953e-89	0.165442	down	3.00637e-87	All genes
DNAJA1	DNAJA1	-0.00255571	2.34432	0.0897713	1.19002	0.219005	0.780995	TRUE	15.1799	1.84533	1.31205e-96	0.221542	down	1.13793e-94	All genes
B4GALT1	B4GALT1	-0.00868531	1.59112	0.0951063	0.769877	0.418317	0.581683	TRUE	8.93359	1.5328	1.88461e-62	0.102212	down	5.49792e-61	All genes
BAG1	BAG1	-0.0021578	1.3709	0.098152	0.530708	0.510091	0.489909	TRUE	5.745	1.37081	2.40124e-51	0.0833249	down	4.78608e-50	All genes
UBAP1	UBAP1	-0.00283965	1.22161	0.0944855	0.412957	0.621254	0.378746	TRUE	1.01941	1.16708	7.34357e-42	0.0729937	down	9.83946e-41	All genes
TOMM5	TOMM5	5.46167e-05	1.57784	0.0972569	0.646376	0.332648	0.667352	TRUE	13.0182	2.01427	1.6343e-59	0.100366	down	4.24652e-58	All genes
MAMDC2	MAMDC2	-0.00118963	1.37316	0.0977163	0.748467	0.716412	0.283588	TRUE	14.6956	2.19116	3.12488e-62	0.128604	up	9.03401e-61	All genes
ZFAND5	ZFAND5	-0.00241105	1.88412	0.0935422	1.00994	0.252577	0.747423	TRUE	16.4337	2.57009	8.28317e-52	0.0929929	down	1.68232e-50	All genes
COL15A1	COL15A1	-0.000794248	1.39067	0.0981905	0.680331	0.799641	0.200359	TRUE	14.2414	2.2319	1.11114e-61	0.195475	up	3.15545e-60	All genes
RAD23B	RAD23B	-0.00600626	1.29458	0.0995686	0.500465	0.552387	0.447613	TRUE	3.11101	1.66496	1.29778e-28	0.0436102	down	1.05834e-27	All genes
CTNNAL1	CTNNAL1	-0.00562585	1.38096	0.0931805	0.590127	0.542226	0.457774	TRUE	4.17256	1.25729	2.04962e-49	0.0819441	down	3.69508e-48	All genes
UGCG	UGCG	-0.00380189	1.47104	0.0928391	0.65568	0.520615	0.479385	TRUE	5.04025	1.31006	5.43853e-51	0.0836128	down	1.06742e-49	All genes
RGS3	RGS3	0.00146365	1.22141	0.0987986	0.574463	0.880552	0.119448	TRUE	16.5956	4.02444	2.11869e-24	0.11585	up	1.45275e-23	All genes
GSN	GSN	0.855046	3.63702	0.791045	1.13089	0.244791	0.755209	TRUE	14.6983	1.79232	2.41914e-96	0.209462	down	2.07014e-94	All genes
STOM	STOM	0.0012502	1.60511	0.0903583	0.75762	0.359543	0.640457	TRUE	12.2734	2.22978	2.20909e-44	0.0702181	down	3.2593e-43	All genes
ARPC5L	ARPC5L	-0.00505331	1.38618	0.0974254	0.597592	0.523498	0.476502	TRUE	5.11786	1.01697	3.46789e-76	0.139222	down	1.62459e-74	All genes
SET	SET	-0.00276318	1.38262	0.0989214	0.53837	0.443485	0.556515	TRUE	8.9643	2.01803	4.62738e-37	0.0562748	down	5.28443e-36	All genes
SURF4	SURF4	-0.000681859	1.35753	0.0990838	0.511977	0.47101	0.52899	TRUE	7.93685	2.3812	2.66336e-24	0.0351382	down	1.81267e-23	All genes
LSP1	LSP1	-0.00190169	1.65939	0.0974021	0.730626	0.52798	0.47202	TRUE	5.0323	0.781679	1.18169e-104	0.234838	down	1.43096e-102	All genes
IGF2	IGF2	-0.000465399	2.34105	0.101084	1.07173	0.452699	0.547301	TRUE	6.47969	0.732286	3.78771e-139	0.437449	down	1.73639e-136	All genes
IPO7	IPO7	0.000801299	1.40114	0.0973086	0.596374	0.523428	0.476572	TRUE	5.03751	1.23741	6.78954e-56	0.0934984	down	1.55626e-54	All genes
ADM	ADM	-0.00160203	1.93639	0.0941528	1.14794	0.59596	0.40404	TRUE	1.10898	1.24828	1.49715e-38	0.0652767	down	1.79602e-37	All genes
EIF3M	EIF3M	-0.00806647	1.49371	0.0910248	0.613344	0.376142	0.623858	TRUE	11.1403	1.80783	2.07248e-59	0.0973863	down	5.36337e-58	All genes
HIPK3	HIPK3	-0.00208394	1.2769	0.0975661	0.492483	0.632466	0.367534	TRUE	0.130395	1.21856	6.75719e-38	0.0660769	down	7.87072e-37	All genes
PAMR1	PAMR1	-0.00259525	1.40563	0.0988897	0.581662	0.586755	0.413245	TRUE	2.93547	0.975599	1.71132e-61	0.114078	down	4.83844e-60	All genes
STIP1	STIP1	-0.00595032	1.29138	0.096673	0.543966	0.639324	0.360676	TRUE	1.13577	0.87871	2.59355e-57	0.11619	down	6.25767e-56	All genes
SF1	SF1	0.00301952	1.64362	0.0922389	0.650011	0.2869	0.7131	TRUE	15.6508	2.46035	2.40975e-52	0.091688	down	5.02135e-51	All genes
CDC42EP2	CDC42EP2	-0.00367281	1.46592	0.0979503	0.663332	0.569098	0.430902	TRUE	3.71988	0.880903	4.51122e-76	0.149972	down	2.06807e-74	All genes
CD248	CD248	-0.00673232	2.25224	0.0889867	1.11211	0.257808	0.742192	TRUE	16.5861	2.59293	1.18422e-51	0.0931723	down	2.38255e-50	All genes
RBM4	RBM4	-0.00139367	1.24638	0.0984064	0.411306	0.577159	0.422841	TRUE	1.67281	1.72383	1.19305e-24	0.0373342	down	8.25105e-24	All genes
CLCF1	CLCF1	-0.00620308	1.4448	0.096744	0.766091	0.705489	0.294511	TRUE	0.59423	0.610289	3.72406e-58	0.184182	down	9.15748e-57	All genes
COA4	COA4	0.000330997	1.2276	0.0972235	0.41606	0.590029	0.409971	TRUE	0.576834	1.80047	4.99579e-22	0.0331829	down	3.03627e-21	All genes
CHORDC1	CHORDC1	-0.00506167	1.31431	0.0980257	0.653325	0.633945	0.366055	TRUE	0.476037	1.00665	6.19112e-48	0.0911723	down	1.05118e-46	All genes
TAF1D	TAF1D	0.000239091	1.45237	0.0944847	0.606357	0.415029	0.584971	TRUE	9.53141	1.66152	1.28592e-57	0.093059	down	3.11434e-56	All genes
CEP126	CEP126	-0.00154278	1.08794	0.101162	0.305459	0.890272	0.109728	TRUE	16.0577	3.97836	3.17745e-23	0.112702	up	2.04542e-22	All genes
NNMT	NNMT	0.84491	3.3542	0.773283	1.1808	0.233602	0.766398	TRUE	17.7693	2.3719	1.23718e-73	0.180782	down	5.12273e-72	All genes
REXO2	REXO2	0.000205227	1.65807	0.0924771	0.722645	0.295326	0.704674	TRUE	17.7969	3.65056	1.2085e-28	0.0458192	down	9.88044e-28	All genes
TAGLN	TAGLN	-0.00220502	2.04789	0.0970282	1.30552	0.572098	0.427902	TRUE	11.8022	2.45537	8.19581e-35	0.0530081	up	8.49769e-34	All genes
FXYD6	FXYD6	-0.00178994	1.18023	0.100966	0.413987	0.842845	0.157155	TRUE	16.9692	3.93536	1.08789e-24	0.0812038	up	7.54001e-24	All genes
PHLDB1	PHLDB1	-0.00359141	1.37689	0.0991208	0.541174	0.530766	0.469234	TRUE	4.74412	1.29937	5.8338e-50	0.0820421	down	1.08526e-48	All genes
H2AFX	H2AFX	-0.00212082	1.27964	0.0994269	0.512063	0.654277	0.345723	TRUE	0.282278	0.963764	2.20963e-49	0.0970082	down	3.97238e-48	All genes
USP2	USP2	-0.00315148	1.23503	0.097409	0.460399	0.871544	0.128456	TRUE	0.143552	0.826007	1.09958e-23	0.174964	down	7.24548e-23	All genes
OAF	OAF	-0.00349851	1.41395	0.0985507	0.609043	0.550849	0.449151	TRUE	3.94081	1.17071	1.10029e-53	0.0913992	down	2.41013e-52	All genes
GTPBP4	GTPBP4	-0.00128551	1.24246	0.0993417	0.45141	0.625805	0.374195	TRUE	1.83711	0.886013	8.54712e-61	0.120722	down	2.35431e-59	All genes
AKR1C1	AKR1C1	0.00201351	1.67598	0.0921319	0.974126	0.472107	0.527893	TRUE	6.57564	1.98228	2.1956e-29	0.0436378	down	1.8396e-28	All genes
SFTA1P	SFTA1P	-0.00431595	1.27612	0.0998249	0.530426	0.882654	0.117346	TRUE	14.753	2.91717	9.24774e-42	0.250073	up	1.23137e-40	All genes
PLXDC2	PLXDC2	-0.00318979	1.52406	0.0964043	0.724586	0.463556	0.536444	TRUE	5.62259	1.93499	8.54142e-28	0.0412041	up	6.7345e-27	All genes
MAP3K8	MAP3K8	-0.00126973	1.49764	0.0928376	0.750776	0.530726	0.469274	TRUE	4.34272	1.31747	9.16725e-47	0.0763506	down	1.4895e-45	All genes
KIF5B	KIF5B	-0.0053382	1.45416	0.0910972	0.62633	0.422102	0.577898	TRUE	10.5216	2.68815	1.67437e-25	0.0371511	down	1.19401e-24	All genes
HNRNPF	HNRNPF	-0.00251208	1.7679	0.0978492	0.751927	0.279908	0.720092	TRUE	13.9374	1.82974	3.6646e-82	0.156303	down	2.08136e-80	All genes
C10orf10	C10orf10	0.00115844	1.83761	0.0974288	1.09935	0.783968	0.216032	TRUE	15.0198	2.53721	1.56295e-49	0.135198	up	2.84165e-48	All genes
GDF10	GDF10	0.00485701	1.29122	0.0993606	0.733421	0.873551	0.126449	TRUE	14.3792	2.74172	1.76661e-45	0.273435	up	2.71897e-44	All genes
UBE2D1	UBE2D1	0.00147751	1.25452	0.0952907	0.458614	0.616607	0.383393	TRUE	0.605289	1.312	3.95404e-35	0.0588091	down	4.17386e-34	All genes
TFAM	TFAM	0.00222928	1.23361	0.0991749	0.408682	0.620674	0.379326	TRUE	1.01616	1.19018	7.97978e-41	0.0705856	down	1.03463e-39	All genes
JMJD1C	JMJD1C	3.26427e-05	1.50644	0.0885559	0.780407	0.377346	0.622654	TRUE	11.8879	2.56804	3.47238e-32	0.0485427	down	3.2345e-31	All genes
HNRNPH3	HNRNPH3	-0.00284206	1.48393	0.0968681	0.629245	0.399525	0.600475	TRUE	10.2373	1.83149	6.84449e-52	0.0826601	down	1.39454e-50	All genes
DDX21	DDX21	0.000619505	2.08009	0.0946796	0.843916	0.312332	0.687668	TRUE	11.1956	1.19392	3.58879e-147	0.356245	down	2.8791e-144	All genes
SAR1A	SAR1A	-0.00299971	1.30559	0.101163	0.493556	0.557778	0.442222	TRUE	2.27485	1.93045	3.23447e-21	0.0311149	down	1.89925e-20	All genes
PPA1	PPA1	-0.00771581	1.58567	0.0978324	0.693094	0.313636	0.686364	TRUE	15.488	2.89266	8.58273e-37	0.0591998	down	9.69788e-36	All genes
VCL	VCL	-0.00545318	1.44201	0.0957737	0.682659	0.472166	0.527834	TRUE	7.11765	2.34826	6.99565e-23	0.0329032	down	4.41042e-22	All genes
SFTPA2	SFTPA2	-0.00108896	1.30943	0.0975437	0.560322	0.812975	0.187025	TRUE	17.0562	3.74027	4.35094e-27	0.0759819	up	3.34023e-26	All genes
SFTPA1	SFTPA1	-0.0016124	1.45122	0.101263	0.738468	0.765972	0.234028	TRUE	16.6542	3.25182	7.35854e-34	0.0786784	up	7.41399e-33	All genes
ADIRF	ADIRF	0.000122537	2.19998	0.0877681	1.14784	0.298143	0.701857	TRUE	14.9659	2.49412	2.76308e-47	0.0792306	down	4.57048e-46	All genes
CH25H	CH25H	-0.000491245	1.34806	0.0992043	0.754618	0.891196	0.108804	TRUE	17.5528	5.16356	8.10964e-16	0.0759355	up	3.61442e-15	All genes
NOLC1	NOLC1	-0.00201826	1.53228	0.0968931	0.664681	0.466188	0.533812	TRUE	6.94541	1.0178	4.68462e-99	0.188098	down	4.42145e-97	All genes
ADD3	ADD3	0.000111689	1.53561	0.0976294	0.639836	0.335226	0.664774	TRUE	16.431	3.71938	1.93189e-24	0.0370807	down	1.32608e-23	All genes
DUSP5	DUSP5	-0.00270816	1.29426	0.0988136	0.607602	0.763816	0.236184	TRUE	0.0498417	0.760719	9.51472e-43	0.151315	down	1.31891e-41	All genes
ABLIM1	ABLIM1	-0.00225586	1.37974	0.0976295	0.595714	0.644431	0.355569	TRUE	0.545965	0.96641	3.84665e-50	0.0974519	down	7.28254e-49	All genes
EIF3A	EIF3A	-0.00413196	1.52426	0.0952764	0.659961	0.39149	0.60851	TRUE	10.3489	1.73164	8.83963e-59	0.0955686	down	2.23357e-57	All genes
BAG3	BAG3	-0.00555634	1.94581	0.0922868	1.22347	0.418033	0.581967	TRUE	7.81846	1.01596	7.4414e-114	0.225017	down	1.32664e-111	All genes
BCCIP	BCCIP	2.88475e-06	1.28447	0.0988659	0.47738	0.565534	0.434466	TRUE	3.6848	1.10455	9.17578e-57	0.0989935	down	2.16508e-55	All genes
CCND2	CCND2	-0.00428848	1.43635	0.0952388	0.65543	0.445658	0.554342	TRUE	8.39035	1.87247	5.78399e-40	0.0612804	down	7.19411e-39	All genes
MLF2	MLF2	-0.00278279	1.46906	0.0949104	0.581715	0.394438	0.605562	TRUE	12.1356	2.69833	5.23748e-30	0.0449283	down	4.49988e-29	All genes
SLC2A3	SLC2A3	-0.00569183	1.84706	0.0969748	0.948648	0.356097	0.643903	TRUE	11.4553	1.80273	4.23487e-62	0.102984	down	1.21881e-60	All genes
GABARAPL1	GABARAPL1	-0.00436459	1.45641	0.100064	0.676611	0.463991	0.536009	TRUE	7.28796	1.53014	5.67943e-51	0.0812411	down	1.1113e-49	All genes
STRAP	STRAP	-0.000348501	1.49375	0.0913737	0.604303	0.383132	0.616868	TRUE	10.4523	1.58221	2.27185e-71	0.12041	down	8.78357e-70	All genes
MGST1	MGST1	0.000613084	2.04044	0.0891402	0.868737	0.26176	0.73824	TRUE	15.523	2.18326	4.78632e-67	0.126812	down	1.59993e-65	All genes
TUBA1C	TUBA1C	-0.00107864	2.01313	0.0982258	0.931153	0.363995	0.636005	TRUE	9.86161	1.16527	2.64207e-122	0.24472	down	5.84718e-120	All genes
LARP4	LARP4	0.000450875	1.26168	0.0999056	0.497405	0.59948	0.40052	TRUE	2.15113	1.0682	6.55317e-51	0.0908794	down	1.27837e-49	All genes
ATG101	ATG101	-0.00915202	1.23104	0.0989046	0.436279	0.636491	0.363509	TRUE	0.460175	1.11279	6.18842e-43	0.0774803	down	8.63419e-42	All genes
IGFBP6	IGFBP6	-0.000979769	3.14705	0.0902709	1.61091	0.197765	0.802235	TRUE	16.0812	1.99049	1.17714e-91	0.225871	down	8.99391e-90	All genes
PA2G4	PA2G4	-0.00876832	1.60673	0.092426	0.689333	0.322738	0.677262	TRUE	12.7409	1.81712	1.37113e-71	0.125298	down	5.36581e-70	All genes
RPL41	RPL41	2.5447	4.86623	1.34277	0.58077	0.671798	0.328202	TRUE	2.69712	0.67134	1.47448e-82	0.204766	down	8.44928e-81	All genes
SRGAP1	SRGAP1	-0.0015359	1.35148	0.0966804	0.567915	0.556436	0.443564	TRUE	3.28428	1.37164	1.50644e-39	0.0637239	down	1.85218e-38	All genes
RAP1B	RAP1B	-0.00643149	1.48897	0.0960782	0.680419	0.350161	0.649839	TRUE	15.0112	3.50877	5.23974e-24	0.0357232	down	3.51396e-23	All genes
CCT2	CCT2	-0.00106128	1.55593	0.0939246	0.679271	0.367121	0.632879	TRUE	10.8423	1.57789	1.61263e-75	0.129471	down	7.23765e-74	All genes
GLIPR1	GLIPR1	-0.00197484	1.36784	0.0969805	0.602395	0.558157	0.441843	TRUE	1.7546	1.88203	1.67395e-21	0.0317776	down	9.9846e-21	All genes
PHLDA1	PHLDA1	0.000573669	2.17039	0.0867034	1.28209	0.368146	0.631854	TRUE	10.9642	1.81087	5.9513e-58	0.0944286	down	1.45784e-56	All genes
NUDT4	NUDT4	0.00118966	1.4515	0.0942738	0.726009	0.493631	0.506369	TRUE	5.77538	1.61145	5.63155e-39	0.0604288	down	6.87135e-38	All genes
UBE2N	UBE2N	-0.00346238	1.42935	0.096016	0.56639	0.443002	0.556998	TRUE	8.46888	1.57692	8.72152e-56	0.0896628	down	1.99198e-54	All genes
METAP2	METAP2	-0.00451129	1.34743	0.0964372	0.549935	0.483246	0.516754	TRUE	6.75709	1.48458	1.84737e-50	0.0806499	down	3.54983e-49	All genes
SNRPF	SNRPF	-0.0059971	1.30714	0.098666	0.492867	0.535443	0.464557	TRUE	3.9639	1.81982	1.86175e-26	0.0394686	down	1.38616e-25	All genes
IGF1	IGF1	-0.00331871	2.51374	0.0915011	1.33828	0.27039	0.72961	TRUE	16.131	2.59425	3.40969e-49	0.0860143	down	6.06189e-48	All genes
TXNRD1	TXNRD1	-0.00235965	1.46905	0.0954756	0.76097	0.503693	0.496307	TRUE	5.39453	1.23719	2.26476e-58	0.0978674	down	5.61205e-57	All genes
ATP2A2	ATP2A2	-0.00830286	1.23957	0.099787	0.450024	0.614452	0.385548	TRUE	0.987155	1.24394	1.83262e-38	0.0653431	down	2.19027e-37	All genes
HSPB8	HSPB8	0.00221521	1.6441	0.0943518	0.897627	0.479329	0.520671	TRUE	6.33043	1.69322	5.62997e-38	0.0583854	down	6.59364e-37	All genes
CLIP1	CLIP1	3.58616e-05	1.32862	0.0956176	0.546792	0.576315	0.423685	TRUE	2.3962	1.31938	6.363e-39	0.0637329	down	7.70523e-38	All genes
TNFRSF19	TNFRSF19	-0.00101433	1.17228	0.0985717	0.588981	0.859951	0.140049	TRUE	15.5213	3.22846	7.18995e-34	0.144808	up	7.25552e-33	All genes
POLR1D	POLR1D	-0.00199913	1.30224	0.0975966	0.491642	0.501574	0.498426	TRUE	5.96532	2.19899	6.42673e-23	0.0330937	down	4.05972e-22	All genes
POMP	POMP	-0.00711237	1.59315	0.0874249	0.671148	0.300655	0.699345	TRUE	15.8871	2.82425	3.41333e-40	0.066404	down	4.29544e-39	All genes
MEDAG	MEDAG	0.00125513	2.48568	0.0950749	1.10635	0.327699	0.672301	TRUE	10.1793	1.05761	2.55845e-160	0.485683	down	1.08817e-156	All genes
HSPH1	HSPH1	-0.00584705	2.22906	0.0946039	1.45695	0.37313	0.62687	TRUE	9.35555	1.17066	8.60168e-112	0.214052	down	1.49204e-109	All genes
DCLK1	DCLK1	-0.00181514	1.40465	0.0975868	0.6797	0.581058	0.418942	TRUE	2.66822	1.04465	5.83298e-55	0.0986806	down	1.30895e-53	All genes
SPG20	SPG20	-0.00160847	1.29806	0.0967304	0.462188	0.545447	0.454553	TRUE	3.7961	1.61408	7.09182e-32	0.0490073	down	6.53955e-31	All genes
UFM1	UFM1	-0.00254601	1.34069	0.097561	0.52663	0.500529	0.499471	TRUE	6.06876	1.87367	8.18467e-31	0.0461605	down	7.29573e-30	All genes
ITGBL1	ITGBL1	0.00304218	1.64227	0.0973678	0.998773	0.833123	0.166877	TRUE	14.9496	2.74127	3.67881e-44	0.16496	up	5.37827e-43	All genes
HNRNPC	HNRNPC	1.41081e-05	1.56794	0.0958989	0.651584	0.283828	0.716172	TRUE	18.2553	3.63557	4.48088e-30	0.0491285	down	3.86017e-29	All genes
SPTSSA	SPTSSA	-3.76434e-05	1.68157	0.0926589	0.769105	0.30658	0.69342	TRUE	14.5111	2.36559	2.71347e-50	0.0845115	down	5.16767e-49	All genes
BAZ1A	BAZ1A	0.0038389	1.48633	0.097841	0.641172	0.582483	0.417517	TRUE	3.591	0.691401	1.58839e-92	0.226218	down	1.25855e-90	All genes
PNN	PNN	-0.00533094	1.33819	0.0967725	0.505895	0.471916	0.528084	TRUE	7.79932	2.12631	1.67519e-29	0.0436509	down	1.40909e-28	All genes
MAP4K5	MAP4K5	-0.0102714	1.30548	0.0959285	0.493176	0.550857	0.449143	TRUE	3.16917	1.73851	8.99103e-27	0.0403447	down	6.81281e-26	All genes
PSMC6	PSMC6	-0.00292411	1.24407	0.094476	0.42365	0.596818	0.403182	TRUE	0.63372	1.63819	1.59627e-25	0.0395482	down	1.14213e-24	All genes
GNPNAT1	GNPNAT1	0.00635434	1.54396	0.095663	0.833003	0.605074	0.394926	TRUE	2.55816	0.723602	9.72899e-78	0.178757	down	4.80313e-76	All genes
FERMT2	FERMT2	-0.0044568	1.52448	0.0972436	0.672563	0.383082	0.616918	TRUE	11.5334	2.21194	1.61601e-41	0.0645994	down	2.13406e-40	All genes
MAPK1IP1L	MAPK1IP1L	-0.000992607	1.33158	0.0990033	0.50064	0.521613	0.478387	TRUE	5.23546	1.38001	7.49835e-48	0.0772424	down	1.26977e-46	All genes
EIF2S1	EIF2S1	-5.7222e-05	1.29726	0.0969016	0.48176	0.563759	0.436241	TRUE	3.94998	0.984433	1.89207e-68	0.126241	down	6.74627e-67	All genes
ZFP36L1	ZFP36L1	2.13937	4.28221	1.13963	0.932568	0.568965	0.431035	TRUE	4.23517	0.800315	1.71405e-90	0.193354	down	1.27916e-88	All genes
RBM25	RBM25	0.00212946	1.58763	0.0896738	0.631487	0.299541	0.700459	TRUE	16.1842	2.88574	1.32616e-39	0.0656721	down	1.63678e-38	All genes
LTBP2	LTBP2	0.00046698	1.70521	0.0960447	0.930838	0.657175	0.342825	TRUE	11.5703	1.31102	1.91462e-125	0.264868	up	5.12002e-123	All genes
AHSA1	AHSA1	-0.0016706	1.28644	0.0955835	0.563617	0.588878	0.411122	TRUE	2.03295	1.15444	1.31526e-45	0.0787748	down	2.03897e-44	All genes
SLIRP	SLIRP	-0.00166518	1.3752	0.0962815	0.53176	0.44418	0.55582	TRUE	9.09509	2.18496	2.3593e-32	0.0483366	down	2.21698e-31	All genes
IFI27	IFI27	-0.00394447	2.25922	0.0941092	1.28079	0.508959	0.491041	TRUE	5.44018	0.958788	1.139e-86	0.164871	down	7.45927e-85	All genes
BDKRB1	BDKRB1	-0.00298015	1.97204	0.0964612	1.06822	0.658733	0.341267	TRUE	1.84946	0.493777	9.48197e-74	0.272217	down	3.95164e-72	All genes
PAPOLA	PAPOLA	-0.00789577	1.34463	0.0969409	0.511341	0.469752	0.530248	TRUE	8.04195	2.52854	5.24274e-22	0.0314459	down	3.18334e-21	All genes
MEG3	MEG3	-0.00358366	1.89233	0.0969489	0.951636	0.307265	0.692735	TRUE	13.5575	2.06369	3.15191e-60	0.103058	down	8.49955e-59	All genes
CRIP1	CRIP1	0.000987364	2.12518	0.0938132	1.26554	0.313807	0.686193	TRUE	15.3395	3.04531	1.06016e-32	0.0513596	down	1.01554e-31	All genes
UBE3A	UBE3A	-0.004094	1.28563	0.0998098	0.498146	0.525573	0.474427	TRUE	4.79277	1.53678	4.47064e-38	0.0594687	down	5.25505e-37	All genes
EIF3J	EIF3J	0.00145839	1.34053	0.0983729	0.544029	0.543461	0.456539	TRUE	4.56905	0.998507	1.14541e-72	0.133438	down	4.65269e-71	All genes
BLOC1S6	BLOC1S6	-0.00432283	1.29107	0.0993803	0.502367	0.605778	0.394222	TRUE	1.23625	1.26407	3.46837e-38	0.0642227	down	4.10701e-37	All genes
COPS2	COPS2	0.00276202	1.32127	0.0979221	0.495977	0.512179	0.487821	TRUE	5.33623	2.04411	1.5662e-24	0.0358465	down	1.07737e-23	All genes
RSL24D1	RSL24D1	-0.00523402	1.49727	0.0970884	0.606792	0.371705	0.628295	TRUE	11.9786	2.13888	1.10927e-46	0.0741922	down	1.7978e-45	All genes
GTF2A2	GTF2A2	-0.00722615	1.34191	0.0986575	0.494044	0.42281	0.57719	TRUE	11.3137	3.04295	6.57207e-22	0.0314173	down	3.9792e-21	All genes
CTSH	CTSH	-0.00280185	1.38686	0.0969254	0.60547	0.53764	0.46236	TRUE	4.42066	1.21099	8.08133e-54	0.0905185	down	1.77623e-52	All genes
MESDC1	MESDC1	0.00183671	1.28121	0.0997855	0.504743	0.686962	0.313038	TRUE	0.268407	0.732065	3.25265e-59	0.14357	down	8.3502e-58	All genes
IL16	IL16	-0.00264125	1.10821	0.0977352	0.275805	0.874938	0.125062	TRUE	16.9864	4.40286	5.50216e-20	0.0791551	up	3.06004e-19	All genes
ALDH1A3	ALDH1A3	-0.00186873	2.33201	0.0978253	1.2429	0.381528	0.618472	TRUE	9.14687	1.10146	9.00574e-122	0.243308	down	1.92663e-119	All genes
VIMP	VIMP	-0.00437774	1.5871	0.0967622	0.653362	0.308416	0.691584	TRUE	15.219	2.61456	5.00264e-44	0.0730604	down	7.26402e-43	All genes
TMEM204	TMEM204	0.00081688	1.17424	0.100746	0.377043	0.882002	0.117998	TRUE	16.7548	4.26876	3.09207e-21	0.0920849	up	1.8173e-20	All genes
SLC9A3R2	SLC9A3R2	-0.00146028	1.15946	0.0999312	0.38495	0.895109	0.104891	TRUE	15.8625	3.82798	3.42091e-25	0.132122	up	2.40739e-24	All genes
RNPS1	RNPS1	-0.00349589	1.38324	0.0977001	0.544913	0.466521	0.533479	TRUE	7.58196	1.57929	7.32051e-50	0.0790506	down	1.35009e-48	All genes
SRRM2	SRRM2	-0.00136009	1.48087	0.0938715	0.597223	0.317703	0.682297	TRUE	15.4513	2.88331	6.70381e-37	0.0593645	down	7.6016e-36	All genes
TNFRSF12A	TNFRSF12A	-0.00531248	2.45421	0.093535	1.13191	0.331923	0.668077	TRUE	10.9545	1.25447	4.73868e-125	0.257917	down	1.21651e-122	All genes
C16orf89	C16orf89	0.000285155	1.41012	0.0976363	0.605029	0.578832	0.421168	TRUE	0.676126	1.84881	3.41505e-21	0.0316515	down	1.99797e-20	All genes
GSPT1	GSPT1	-0.00288849	1.31514	0.0999048	0.478787	0.578471	0.421529	TRUE	3.3705	0.992377	3.2108e-63	0.116067	down	9.49628e-62	All genes
C16orf45	C16orf45	0.000135516	1.50569	0.100108	0.664761	0.569036	0.430964	TRUE	3.70673	0.888957	3.63382e-75	0.147278	down	1.59739e-73	All genes
ARL6IP1	ARL6IP1	-0.0067319	1.48367	0.0988059	0.61674	0.382189	0.617811	TRUE	13.0727	2.99944	6.46326e-27	0.0400041	down	4.92651e-26	All genes
RBBP6	RBBP6	-0.00471811	1.41718	0.0933092	0.624517	0.446471	0.553529	TRUE	8.55344	1.98207	1.37988e-36	0.0554758	down	1.54826e-35	All genes
MVP	MVP	0.00234307	1.26946	0.0998381	0.451496	0.56564	0.43436	TRUE	2.10899	1.80754	2.14412e-23	0.0349231	down	1.3914e-22	All genes
DNAJA2	DNAJA2	-0.00227668	1.31382	0.0955877	0.46261	0.525926	0.474074	TRUE	5.19117	1.41411	1.04324e-45	0.0732203	down	1.62513e-44	All genes
MT2A	MT2A	2.67799	7.17796	1.73686	1.18273	0.44711	0.55289	TRUE	8.18433	1.00055	4.71497e-124	0.255191	down	1.16387e-121	All genes
MT1E	MT1E	0.588099	3.03164	0.691113	1.68967	0.476759	0.523241	TRUE	3.37091	1.19727	6.22284e-49	0.0826279	down	1.10023e-47	All genes
MT1M	MT1M	0.00340603	2.82888	0.0955388	1.76347	0.39777	0.60223	TRUE	10.0551	1.78223	1.46189e-53	0.0856621	down	3.19129e-52	All genes
MT1A	MT1A	0.00108364	3.06046	0.0973958	1.74869	0.447642	0.552358	TRUE	7.37581	1.01394	1.6204e-106	0.206269	down	2.26082e-104	All genes
PSMD7	PSMD7	-0.00330442	1.30392	0.093483	0.45775	0.517581	0.482419	TRUE	5.14822	2.09964	5.44512e-23	0.0333481	down	3.44983e-22	All genes
COTL1	COTL1	-0.00284285	1.4305	0.0950707	0.645362	0.532095	0.467905	TRUE	4.695	1.15552	1.0401e-59	0.102389	down	2.74707e-58	All genes
CRISPLD2	CRISPLD2	-0.0019981	1.87816	0.0942173	0.914455	0.303372	0.696628	TRUE	15.0294	2.5528	2.34176e-45	0.075423	down	3.56993e-44	All genes
MAP1LC3B	MAP1LC3B	-0.00382783	1.61378	0.0940792	0.733688	0.308359	0.691641	TRUE	15.9931	3.06659	2.3503e-34	0.0550724	down	2.39053e-33	All genes
TUBB3	TUBB3	0.00192248	1.59814	0.09819	0.92067	0.670192	0.329808	TRUE	0.709682	0.668198	5.50826e-64	0.165362	down	1.69962e-62	All genes
YWHAE	YWHAE	-0.000913119	1.69991	0.0911835	0.691329	0.244538	0.755462	TRUE	17.6592	2.787	2.22373e-49	0.0917555	down	3.98657e-48	All genes
MIR22HG	MIR22HG	-0.00635073	1.49427	0.0986857	0.641667	0.516578	0.483422	TRUE	5.35889	1.05311	9.03104e-75	0.134487	down	3.81324e-73	All genes
C1QBP	C1QBP	1.14645e-05	1.42903	0.0960493	0.59002	0.410999	0.589001	TRUE	9.8639	1.80832	7.23443e-51	0.0806654	down	1.40699e-49	All genes
EIF5A	EIF5A	-0.00371782	1.94036	0.0933561	0.926453	0.28038	0.71962	TRUE	13.311	1.67901	5.79415e-92	0.178178	down	4.53498e-90	All genes
EIF4A1	EIF4A1	-0.000441104	1.46097	0.098515	0.601848	0.444111	0.555889	TRUE	7.73306	1.11265	5.85649e-96	0.176275	down	4.88142e-94	All genes
KDM6B	KDM6B	-0.00115135	1.79067	0.0964058	0.90174	0.472305	0.527695	TRUE	6.26712	0.807439	1.77083e-123	0.287851	down	4.059e-121	All genes
MYH10	MYH10	0.00230199	1.35303	0.0960586	0.668429	0.593756	0.406244	TRUE	12.2001	2.28899	9.0259e-42	0.0654398	up	1.20433e-40	All genes
PEMT	PEMT	-0.000136408	1.10488	0.0984934	0.311868	0.83024	0.16976	TRUE	18.0348	4.55507	9.51292e-20	0.0562692	up	5.22722e-19	All genes
MAP2K3	MAP2K3	-0.000637327	1.38165	0.095457	0.683588	0.62964	0.37036	TRUE	0.464961	1.04346	3.86716e-46	0.0860584	down	6.11316e-45	All genes
NUFIP2	NUFIP2	-0.000520281	1.37018	0.0981518	0.572611	0.54609	0.45391	TRUE	4.14719	1.20558	1.48201e-52	0.0884906	down	3.09823e-51	All genes
PSMD11	PSMD11	-0.00570694	1.26988	0.0990361	0.435384	0.576831	0.423169	TRUE	2.29339	1.50177	9.17029e-32	0.0499287	down	8.41988e-31	All genes
IGFBP4	IGFBP4	1.53405	4.22723	1.05022	1.07121	0.223177	0.776823	TRUE	17.7473	2.5027	1.07726e-63	0.135649	down	3.29232e-62	All genes
VAT1	VAT1	-0.00278477	1.49518	0.0964899	0.681517	0.452193	0.547807	TRUE	7.87724	1.56128	8.29479e-53	0.0843329	down	1.75118e-51	All genes
ARL4D	ARL4D	-0.00518018	1.58402	0.0967762	0.896808	0.530511	0.469489	TRUE	4.01411	1.31735	3.45313e-45	0.0737423	down	5.23928e-44	All genes
KPNB1	KPNB1	-0.00327121	1.31349	0.0970479	0.494986	0.500913	0.499087	TRUE	6.04188	1.87915	1.44388e-30	0.0457515	down	1.27292e-29	All genes
SGCA	SGCA	-0.00267789	1.25497	0.099955	0.441828	0.883141	0.116859	TRUE	15.3078	3.2917	1.44381e-32	0.16279	up	1.36874e-31	All genes
LRRC59	LRRC59	0.00390608	1.41922	0.0953087	0.599506	0.467332	0.532668	TRUE	7.09353	1.19974	9.73645e-77	0.133116	down	4.62878e-75	All genes
TOB1	TOB1	-0.000295556	1.37425	0.0966426	0.700745	0.616965	0.383035	TRUE	0.709329	1.1028	5.20368e-44	0.0792874	down	7.53888e-43	All genes
SPAG9	SPAG9	-0.00398202	1.43409	0.0892083	0.63474	0.454441	0.545559	TRUE	8.20617	2.00504	2.01431e-34	0.0518329	down	2.0553e-33	All genes
NME1	NME1	-0.00299502	1.33215	0.0973874	0.526692	0.557214	0.442786	TRUE	3.78414	1.21295	4.43849e-50	0.0841096	down	8.3293e-49	All genes
SRSF1	SRSF1	-0.00765984	1.33886	0.100561	0.516441	0.49186	0.50814	TRUE	6.47404	1.5432	1.54272e-45	0.0717972	down	2.38582e-44	All genes
PTRH2	PTRH2	0.00373105	1.30743	0.0996798	0.47845	0.585086	0.414914	TRUE	3.25089	0.92684	1.04803e-67	0.129173	down	3.63581e-66	All genes
VMP1	VMP1	-0.00818394	1.55733	0.0974057	0.729848	0.338688	0.661312	TRUE	16.5133	4.05812	8.0597e-21	0.0307706	down	4.64754e-20	All genes
CCDC47	CCDC47	-0.00432334	1.4122	0.0970705	0.563773	0.397786	0.602214	TRUE	11.6756	2.56071	1.21781e-31	0.0475524	down	1.11338e-30	All genes
DDX5	DDX5	1.47693	3.30176	0.919282	0.832744	0.317323	0.682677	TRUE	12.7345	1.53075	6.03036e-105	0.210591	down	7.5888e-103	All genes
SRSF2	SRSF2	0.00176169	1.7915	0.101178	0.782916	0.273855	0.726145	TRUE	14.4407	1.96041	6.29286e-75	0.140678	down	2.70709e-73	All genes
SOCS3	SOCS3	-0.00158373	2.32642	0.0918228	1.14482	0.265986	0.734014	TRUE	13.2893	1.55981	1.67988e-109	0.232718	down	2.62963e-107	All genes
EIF4A3	EIF4A3	-0.00278705	1.91201	0.0915001	1.08248	0.368211	0.631789	TRUE	9.66276	1.21796	2.32599e-108	0.204815	down	3.47168e-106	All genes
BAIAP2	BAIAP2	-0.00264122	1.3197	0.0994609	0.534594	0.639511	0.360489	TRUE	0.532048	1.01977	1.80683e-47	0.0894834	down	3.02774e-46	All genes
ARHGDIA	ARHGDIA	0.00108023	1.37227	0.0979951	0.556491	0.445718	0.554282	TRUE	9.0447	2.31974	9.67216e-29	0.0423498	down	7.92796e-28	All genes
CSNK1D	CSNK1D	0.00318774	1.2324	0.10037	0.411021	0.605866	0.394134	TRUE	1.16612	1.33557	3.01591e-35	0.0581219	down	3.19936e-34	All genes
METRNL	METRNL	0.000354666	1.23022	0.0984988	0.43466	0.743937	0.256063	TRUE	0.323987	0.682933	2.57116e-50	0.16539	down	4.91123e-49	All genes
CHMP1B	CHMP1B	0.000434187	1.65283	0.0947744	0.992584	0.595284	0.404716	TRUE	1.70073	1.05082	5.55554e-50	0.0904485	down	1.03649e-48	All genes
SNRPD1	SNRPD1	-0.00432255	1.45177	0.0982862	0.585668	0.425023	0.574977	TRUE	8.91255	1.50828	3.06313e-64	0.105677	down	9.58985e-63	All genes
TXNL1	TXNL1	-0.00262706	1.33886	0.0968885	0.494827	0.481786	0.518214	TRUE	7.22946	2.07009	3.9368e-29	0.0431034	down	3.27709e-28	All genes
FKBP1A	FKBP1A	-0.00102635	2.18691	0.0905943	0.982157	0.200297	0.799703	TRUE	17.4904	2.3883	3.26403e-69	0.153187	down	1.22506e-67	All genes
SNRPB	SNRPB	-0.00414362	1.52284	0.0924671	0.639015	0.386271	0.613729	TRUE	10.2118	1.52107	7.04502e-75	0.127401	down	2.99437e-73	All genes
CPXM1	CPXM1	-0.00255876	1.62221	0.0922705	0.770583	0.444851	0.555149	TRUE	7.52393	1.10395	2.66875e-94	0.172867	down	2.16811e-92	All genes
ESF1	ESF1	-0.00730689	1.23803	0.0983167	0.438031	0.62226	0.37774	TRUE	0.353871	1.31044	8.22658e-35	0.0585744	down	8.51584e-34	All genes
NAA20	NAA20	-0.00631942	1.24218	0.0963186	0.421436	0.558895	0.441105	TRUE	3.34253	1.47371	1.64127e-35	0.0559823	down	1.75855e-34	All genes
NXT1	NXT1	-0.00218707	1.42842	0.0942499	0.570005	0.490981	0.509019	TRUE	6.29773	1.022	2.4765e-89	0.166078	down	1.74661e-87	All genes
MAPRE1	MAPRE1	0.00200926	1.30315	0.100142	0.47739	0.604141	0.395859	TRUE	2.46175	0.953826	5.22574e-60	0.113119	down	1.39165e-58	All genes
CHMP4B	CHMP4B	-0.00856173	1.3513	0.0940443	0.519547	0.461168	0.538832	TRUE	8.63723	2.67534	4.14001e-21	0.0300027	down	2.41112e-20	All genes
EIF2S2	EIF2S2	-0.00229251	1.31155	0.101333	0.487733	0.516609	0.483391	TRUE	4.93769	2.12708	4.83495e-22	0.0318339	down	2.94409e-21	All genes
TGM2	TGM2	-6.83911e-05	1.65076	0.0976127	0.907972	0.647542	0.352458	TRUE	12.7492	1.76735	4.37891e-76	0.135392	up	2.02186e-74	All genes
TOP1	TOP1	0.000544478	1.65914	0.0936331	0.753771	0.336979	0.663021	TRUE	11.5133	1.55094	1.28795e-85	0.15309	down	7.94813e-84	All genes
WISP2	WISP2	-0.00331344	1.99947	0.0977469	0.972855	0.490954	0.509046	TRUE	6.22191	1.16252	7.09368e-72	0.124648	down	2.79308e-70	All genes
DDX27	DDX27	-0.000879474	1.34362	0.0965423	0.61042	0.60182	0.39818	TRUE	2.48937	0.852628	1.22881e-67	0.136581	down	4.24006e-66	All genes
PTGIS	PTGIS	-0.00170239	1.87195	0.0936013	0.912665	0.390571	0.609429	TRUE	9.2402	1.20961	5.14476e-103	0.190978	down	5.89626e-101	All genes
ADRM1	ADRM1	-0.00702506	1.30727	0.097448	0.475016	0.523513	0.476487	TRUE	5.0771	1.56641	5.70578e-38	0.0590732	down	6.66543e-37	All genes
FSTL3	FSTL3	0.000474248	1.46333	0.095404	0.687639	0.518273	0.481727	TRUE	4.79179	1.42157	2.28012e-43	0.0692418	down	3.23756e-42	All genes
MIDN	MIDN	-0.00310569	1.34451	0.095712	0.553632	0.558813	0.441187	TRUE	3.77535	1.11861	2.56144e-56	0.0976811	down	5.99975e-55	All genes
LSM7	LSM7	-0.00466179	1.38884	0.0934129	0.533108	0.417289	0.582711	TRUE	11.2751	2.84181	7.80424e-25	0.0361564	down	5.46212e-24	All genes
HNRNPM	HNRNPM	-0.00430883	1.34538	0.0968737	0.523769	0.476462	0.523538	TRUE	7.24518	1.85328	9.84659e-36	0.0542089	down	1.05855e-34	All genes
DNAJB1	DNAJB1	0.00150687	2.60942	0.0921222	1.60636	0.247552	0.752448	TRUE	13.994	1.71288	7.44799e-97	0.199995	down	6.54811e-95	All genes
COMP	COMP	-0.00151988	1.98408	0.103267	1.26129	0.885356	0.114644	TRUE	14.5116	2.94808	7.22645e-40	0.258562	up	8.97087e-39	All genes
PDCD5	PDCD5	0.00165782	1.41872	0.093148	0.565651	0.391185	0.608815	TRUE	12.3089	2.76896	4.62746e-29	0.0433845	down	3.83214e-28	All genes
UBA2	UBA2	-0.000294511	1.27575	0.0968493	0.450209	0.555803	0.444197	TRUE	3.83967	1.2896	6.93075e-46	0.0754076	down	1.08492e-44	All genes
FXYD5	FXYD5	-0.00686279	1.45268	0.0938254	0.631388	0.441765	0.558235	TRUE	8.32855	1.54428	5.10462e-57	0.0920102	down	1.2179e-55	All genes
SPINT2	SPINT2	-0.00173116	1.2878	0.0972521	0.496303	0.890103	0.109897	TRUE	15.0133	3.05425	2.62424e-40	0.270079	up	3.33512e-39	All genes
PPP1R14A	PPP1R14A	0.00155555	1.67057	0.0984985	0.830605	0.785423	0.214577	TRUE	13.2138	1.77215	2.98278e-94	0.355827	up	2.39294e-92	All genes
FBL	FBL	-0.0032995	1.3894	0.0957769	0.559671	0.493772	0.506228	TRUE	6.30363	1.21847	3.45372e-67	0.11433	down	1.1728e-65	All genes
SERTAD1	SERTAD1	0.00112789	1.8343	0.089987	0.813708	0.327135	0.672865	TRUE	11.5957	1.44042	1.16542e-101	0.1929	down	1.31223e-99	All genes
PPP1R15A	PPP1R15A	-0.00176659	1.95915	0.0904396	0.90952	0.251869	0.748131	TRUE	17.6379	2.94288	7.58118e-44	0.0780423	down	1.08607e-42	All genes
PRMT1	PRMT1	-0.0072239	1.36096	0.0978943	0.521413	0.462264	0.537736	TRUE	8.23567	2.27517	2.71824e-27	0.0399866	down	2.11463e-26	All genes
NAPSA	NAPSA	-0.00293721	1.23599	0.0977066	0.489197	0.879719	0.120281	TRUE	18.2307	5.33465	1.8284e-15	0.0630868	up	7.99364e-15	All genes
HAS1	HAS1	0.00156451	2.7181	0.094192	1.38424	0.45268	0.54732	TRUE	6.30926	0.71011	9.38906e-137	0.477136	down	3.76619e-134	All genes
MYADM	MYADM	-0.00698749	1.96003	0.0906451	0.964543	0.261008	0.738992	TRUE	18.3131	3.37197	3.31724e-35	0.0599907	down	3.50742e-34	All genes
ERVK3-1	ERVK3-1	-0.000533881	1.22669	0.0986111	0.418255	0.643914	0.356086	TRUE	0.425184	1.0612	3.36205e-45	0.0836474	down	5.11318e-44	All genes
RPS4Y1	RPS4Y1	-0.00632658	2.1246	0.0936656	0.936049	0.323948	0.676052	TRUE	13.2679	2.00278	4.95489e-62	0.106151	down	1.41967e-60	All genes
DDX3Y	DDX3Y	-0.00225562	1.43059	0.0951417	0.62903	0.589219	0.410781	TRUE	3.19186	0.80449	7.33867e-78	0.163654	down	3.67966e-76	All genes
RANBP1	RANBP1	0.00310715	1.29262	0.096794	0.485544	0.494843	0.505157	TRUE	6.41219	2.16195	1.04043e-24	0.035947	down	7.21889e-24	All genes
PITPNB	PITPNB	-0.00486265	1.30485	0.102384	0.466178	0.568642	0.431358	TRUE	3.66594	1.06455	1.26907e-59	0.105698	down	3.33807e-58	All genes
HMOX1	HMOX1	0.00229522	2.20531	0.0970371	1.44365	0.705754	0.294246	TRUE	0.65202	0.602398	1.27648e-58	0.190141	down	3.21272e-57	All genes
SNU13	SNU13	-0.0030246	1.7029	0.0947735	0.709687	0.285129	0.714871	TRUE	15.4829	2.42166	3.54693e-53	0.0930505	down	7.61345e-52	All genes
ARFGAP3	ARFGAP3	0.00208064	1.31529	0.0962248	0.483452	0.601321	0.398679	TRUE	0.402914	1.59958	2.90622e-26	0.0411137	down	2.14903e-25	All genes
PIM3	PIM3	0.00332129	1.58932	0.0967535	0.773638	0.528893	0.471107	TRUE	4.889	0.896573	1.5987e-87	0.172689	down	1.08005e-85	All genes
TYMP	TYMP	-0.00131627	1.3376	0.0954295	0.568967	0.581619	0.418381	TRUE	0.678884	1.77792	1.55744e-22	0.0340431	down	9.68571e-22	All genes
CH507-9B2.3	CH507-9B2.3	-0.00151559	1.11016	0.101972	0.265818	0.89168	0.10832	TRUE	15.9764	3.92812	1.23436e-23	0.114847	up	8.09209e-23	All genes
NRIP1	NRIP1	-0.00408089	1.52089	0.0962398	0.84347	0.565918	0.434082	TRUE	3.34382	0.939527	2.22212e-67	0.12751	down	7.58594e-66	All genes
BTG3	BTG3	-0.00549427	1.65558	0.0978889	0.736685	0.382407	0.617593	TRUE	9.90875	1.37576	6.08017e-88	0.155328	down	4.15133e-86	All genes
ADAMTS1	ADAMTS1	0.00259212	1.99602	0.0933988	1.09474	0.404994	0.595006	TRUE	9.51172	1.67978	2.89077e-56	0.0905256	down	6.7221e-55	All genes
CCT8	CCT8	-0.00341499	1.3382	0.0974811	0.520105	0.455718	0.544282	TRUE	8.37794	2.05406	1.52487e-33	0.0503403	down	1.51495e-32	All genes

## Sheet: Epithelial_IPF
	geneID	mu1	mu2	sigma1	sigma2	lambda1	lambda2	passBinary	switch_at_time	CI	pvalues	pseudoR2s	direction	FDR	feature_type	intersect_with_DEG(log2FC >0.58)	distinct switch genes (IPF vs Control)
HES4	HES4	-0.00268019	1.43037	0.0970538	0.690661	0.569695	0.430305	TRUE	23.3158	3.12255	8.85843e-134	0.0300044	down	4.0695e-133	TFs	FALSE	FALSE
TP73	TP73	-0.00140669	1.30133	0.0977726	0.489153	0.603642	0.396358	TRUE	35.1567	2.22657	0	0.189379	up	0	TFs	FALSE	FALSE
ECE1	ECE1	-0.000461782	1.22268	0.0991642	0.477317	0.830203	0.169797	TRUE	20.7524	1.68996	0	0.183054	down	0	Surface proteins	FALSE	FALSE
PTPRF	PTPRF	-0.00580481	1.61501	0.0939582	0.691737	0.298317	0.701683	TRUE	19.9551	1.94136	8.73695e-298	0.0741788	up	8.27882e-297	Surface proteins	FALSE	FALSE
CCDC17	CCDC17	0.000613235	2.10566	0.0957977	0.876275	0.296719	0.703281	TRUE	26.6991	1.21435	0	0.53097	up	0	TFs	FALSE	FALSE
TSPAN1	TSPAN1	2.01801	4.23273	1.22801	0.915486	0.375991	0.624009	TRUE	25.6372	1.2737	0	0.26491	up	0	Surface proteins	TRUE	FALSE
F3	F3	-0.00112958	1.3594	0.0970359	0.827464	0.794465	0.205535	TRUE	19.2138	2.07744	2.10888e-241	0.0989779	down	1.61437e-240	Surface proteins	FALSE	FALSE
F11R	F11R	-0.00155891	1.46843	0.09471	0.602948	0.371484	0.628516	TRUE	22.2483	2.71046	3.72581e-170	0.038975	up	2.12072e-169	Surface proteins	FALSE	FALSE
LAMC2	LAMC2	-0.00142988	1.34785	0.0980892	0.525516	0.532011	0.467989	TRUE	32.9801	2.10484	0	0.121151	up	0	Surface proteins	FALSE	FALSE
CD46	CD46	-0.00474548	1.60706	0.0955176	0.666633	0.267021	0.732979	TRUE	14.8517	2.26875	1.91482e-188	0.0473202	up	1.18487e-187	Surface proteins	FALSE	TRUE
IRF6	IRF6	-0.00263491	1.30815	0.097458	0.499034	0.534202	0.465798	TRUE	33.9519	3.30822	3.01119e-170	0.0401038	up	1.71516e-169	TFs	FALSE	TRUE
EPAS1	EPAS1	-0.00137726	1.31849	0.0980046	0.670179	0.802594	0.197406	TRUE	21.1953	1.58612	0	0.190998	down	0	TFs	FALSE	FALSE
EFEMP1	EFEMP1	-0.00155671	1.41204	0.0975289	0.578086	0.468899	0.531101	TRUE	29.6169	3.00087	1.38131e-178	0.0408986	up	8.20548e-178	Surface proteins	FALSE	TRUE
PROM2	PROM2	-0.000587383	1.26792	0.0988136	0.539085	0.888843	0.111157	TRUE	20.6838	1.52389	0	0.399749	down	0	Surface proteins	FALSE	TRUE
TMEM131	TMEM131	-0.00174854	1.27959	0.0976374	0.474403	0.579631	0.420369	TRUE	35.6336	2.76369	7.90121e-261	0.069219	up	6.47963e-260	Surface proteins	FALSE	TRUE
IL1R1	IL1R1	-0.00025916	1.21796	0.0985011	0.518369	0.825653	0.174347	TRUE	18.4731	2.28092	5.59254e-195	0.0892915	down	3.55762e-194	Surface proteins	FALSE	FALSE
DNER	DNER	-0.00235538	1.25413	0.0986169	0.450973	0.686009	0.313991	TRUE	37.2818	2.71254	1.34547e-301	0.177186	up	1.2914e-300	Surface proteins	FALSE	FALSE
GPC1	GPC1	0.000253452	1.14746	0.0998148	0.397238	0.884359	0.115641	TRUE	18.1872	2.64327	9.43041e-141	0.0957078	down	4.5204e-140	Surface proteins	FALSE	TRUE
IL5RA	IL5RA	-0.00224276	1.26783	0.0970218	0.450593	0.632313	0.367687	TRUE	35.9191	2.36999	0	0.183093	up	0	Surface proteins	FALSE	FALSE
BHLHE40	BHLHE40	-0.000225523	1.45348	0.0968729	0.826137	0.688768	0.311232	TRUE	19.5239	1.83898	0	0.0850399	down	0	TFs	FALSE	FALSE
CRTAP	CRTAP	-0.000697911	1.17017	0.0995678	0.416789	0.864808	0.135192	TRUE	19.366	2.22185	3.42194e-204	0.122158	down	2.28914e-203	Surface proteins	FALSE	FALSE
LZTFL1	LZTFL1	-0.00371008	1.47494	0.0958807	0.599138	0.448363	0.551637	TRUE	30.1457	1.64807	0	0.1957	up	0	Surface proteins	FALSE	FALSE
PLXNB1	PLXNB1	-0.0037679	1.33462	0.0964184	0.510019	0.504206	0.495794	TRUE	31.7383	2.52853	1.20477e-271	0.0665897	up	1.02934e-270	Surface proteins	FALSE	FALSE
GLT8D1	GLT8D1	0.00047794	1.34316	0.0975736	0.511825	0.509338	0.490662	TRUE	32.0016	2.13505	0	0.104706	up	0	Surface proteins	FALSE	FALSE
TMF1	TMF1	-0.00182838	1.53984	0.0959288	0.662365	0.358712	0.641288	TRUE	25.0534	1.77317	0	0.108149	up	0	TFs	FALSE	FALSE
ST3GAL6	ST3GAL6	-0.0026332	1.44724	0.0977385	0.596389	0.618281	0.381719	TRUE	35.5678	2.32258	0	0.196609	up	0	Surface proteins	FALSE	FALSE
CCDC80	CCDC80	-0.00102391	1.58224	0.0953119	0.784418	0.507493	0.492507	TRUE	32.7408	3.06531	1.63997e-190	0.0449125	up	1.0241e-189	Surface proteins	FALSE	FALSE
SLC15A2	SLC15A2	-0.000894186	1.18257	0.0990484	0.441545	0.850212	0.149788	TRUE	20.0705	1.92236	6.81163e-273	0.153199	down	5.85657e-272	Surface proteins	FALSE	FALSE
ATP1B3	ATP1B3	-0.00151199	1.17979	0.0979092	0.581752	0.808175	0.191825	TRUE	17.9918	2.37892	3.88915e-180	0.0757506	down	2.32552e-179	Surface proteins	FALSE	TRUE
SOX2	SOX2	-0.00144197	1.52464	0.0955367	0.654552	0.372988	0.627012	TRUE	23.3325	2.48237	2.42356e-209	0.0485244	up	1.64689e-208	TFs	FALSE	TRUE
CD38	CD38	-0.00261856	1.30833	0.0970008	0.506037	0.592569	0.407431	TRUE	35.6264	2.45694	0	0.100373	up	0	Surface proteins	FALSE	FALSE
PROM1	PROM1	-0.00335904	1.70927	0.0955209	0.747983	0.372114	0.627886	TRUE	25.9985	1.71173	0	0.122977	up	0	Surface proteins	FALSE	TRUE
GPBP1	GPBP1	-0.00369952	1.36306	0.0965022	0.523489	0.438812	0.561188	TRUE	26.986	3.03088	3.9118e-160	0.0361522	up	2.10208e-159	TFs	FALSE	TRUE
FAM174A	FAM174A	-0.00199804	2.15345	0.0957356	0.887517	0.202216	0.797784	TRUE	20.0307	1.07659	0	0.299356	up	0	Surface proteins	FALSE	FALSE
ZNF474	ZNF474	-0.0012828	1.25197	0.098351	0.436842	0.654672	0.345328	TRUE	36.4326	2.50934	0	0.187478	up	0	TFs	FALSE	FALSE
P4HA2	P4HA2	-0.00210153	1.34959	0.0985589	0.510707	0.524309	0.475691	TRUE	32.6191	2.05825	0	0.124852	up	0	Surface proteins	FALSE	FALSE
SLC22A4	SLC22A4	-0.00138487	1.53894	0.0973658	0.639667	0.475281	0.524719	TRUE	31.7108	1.72052	0	0.273489	up	0	Surface proteins	FALSE	FALSE
RNF130	RNF130	-0.00306367	1.61362	0.0934546	0.699988	0.338539	0.661461	TRUE	23.3313	1.86364	0	0.090187	up	0	Surface proteins	FALSE	TRUE
SLC22A23	SLC22A23	-0.0031989	1.2904	0.0975148	0.483504	0.582602	0.417398	TRUE	35.3058	2.49579	0	0.0910646	up	0	Surface proteins	FALSE	FALSE
TUBB	TUBB	-0.000343886	1.2567	0.0976643	0.593583	0.663527	0.336473	TRUE	15.505	2.7213	5.15984e-137	0.0324968	down	2.41938e-136	Surface proteins	FALSE	TRUE
ENPP4	ENPP4	-0.00144556	1.27713	0.0984125	0.455795	0.596423	0.403577	TRUE	35.8163	2.53748	0	0.0916671	up	0	Surface proteins	FALSE	FALSE
MARCKS	MARCKS	-0.00151947	1.54926	0.0935872	0.697619	0.361377	0.638623	TRUE	23.942	2.14094	2.8655e-285	0.068008	up	2.60349e-284	Surface proteins	FALSE	TRUE
LRP11	LRP11	-0.00468245	1.56704	0.094623	0.678651	0.399388	0.600612	TRUE	28.3714	1.53186	0	0.198024	up	0	Surface proteins	FALSE	FALSE
SUN1	SUN1	-0.0036893	1.43323	0.0965691	0.590525	0.419841	0.580159	TRUE	27.4155	2.15683	0	0.0770058	up	0	Surface proteins	FALSE	FALSE
AHR	AHR	-0.00189433	1.24308	0.0983093	0.490945	0.683063	0.316937	TRUE	16.6526	2.36287	1.05647e-184	0.044925	down	6.43011e-184	TFs	FALSE	FALSE
ITGB8	ITGB8	-0.00102479	1.27387	0.0977802	0.471535	0.584134	0.415866	TRUE	37.4485	3.67397	6.47592e-155	0.0377624	up	3.38855e-154	Surface proteins	FALSE	FALSE
IGFBP3	IGFBP3	-0.00162553	1.68946	0.0980828	1.06163	0.873343	0.126657	TRUE	21.0325	1.56956	0	0.319377	down	0	Surface proteins	FALSE	TRUE
ZNF273	ZNF273	0.000325746	1.2675	0.0976906	0.451701	0.633014	0.366986	TRUE	36.3869	2.4156	0	0.139009	up	0	TFs	FALSE	FALSE
SEMA3C	SEMA3C	-0.000484232	1.28086	0.0985561	0.463043	0.592042	0.407958	TRUE	35.8386	2.62148	1.21403e-293	0.0824618	up	1.13849e-292	Surface proteins	FALSE	FALSE
STEAP4	STEAP4	-0.00115336	1.54155	0.0983685	0.84674	0.78679	0.21321	TRUE	22.1568	1.37796	0	0.257203	down	0	Surface proteins	FALSE	FALSE
ZKSCAN1	ZKSCAN1	-0.00622421	1.53685	0.0955868	0.683504	0.391259	0.608741	TRUE	26.1655	2.03705	0	0.0828195	up	0	TFs	FALSE	FALSE
MET	MET	-0.00111211	1.26745	0.099006	0.543755	0.724466	0.275534	TRUE	19.533	1.86677	0	0.0897894	down	0	Surface proteins	FALSE	FALSE
UBA1	UBA1	-0.00212071	1.33662	0.0986282	0.507702	0.462271	0.537729	TRUE	28.6834	3.26552	2.89159e-146	0.032907	up	1.43752e-145	Surface proteins	FALSE	FALSE
TIMP1	TIMP1	-0.00146818	1.62032	0.0934362	0.888409	0.47459	0.52541	TRUE	30.9461	2.31057	0	0.0789931	down	0	Surface proteins	TRUE	FALSE
WDR13	WDR13	-0.00149984	1.47729	0.0969607	0.600861	0.40163	0.59837	TRUE	27.338	1.76066	0	0.123785	up	0	Surface proteins	FALSE	FALSE
TSPAN6	TSPAN6	-0.00556965	1.80493	0.095737	0.763479	0.242045	0.757955	TRUE	18.0226	1.61393	0	0.106418	up	0	Surface proteins	FALSE	FALSE
ATP6AP1	ATP6AP1	-0.00252496	1.52862	0.0944799	0.614234	0.348016	0.651984	TRUE	22.7076	2.07362	3.20758e-290	0.06986	up	2.95372e-289	Surface proteins	FALSE	FALSE
SLC7A2	SLC7A2	8.97311e-05	1.32137	0.0980125	0.527629	0.649198	0.350802	TRUE	37.2886	2.56796	0	0.123797	up	0	Surface proteins	FALSE	FALSE
ASPH	ASPH	-0.000754309	1.2459	0.0981802	0.507362	0.668421	0.331579	TRUE	18.1921	2.30755	9.37746e-203	0.0489356	down	6.22218e-202	Surface proteins	FALSE	TRUE
RFX3	RFX3	-0.00105476	1.68057	0.0944375	0.703721	0.37351	0.62649	TRUE	28.3572	1.37333	0	0.314837	up	0	TFs	FALSE	FALSE
CTSL	CTSL	-0.00179605	1.26623	0.0974364	0.444566	0.59179	0.40821	TRUE	36.0455	2.74554	1.5673e-268	0.0731491	up	1.31569e-267	Surface proteins	FALSE	FALSE
AKNA	AKNA	-0.00188016	1.2838	0.0972686	0.472599	0.606765	0.393235	TRUE	35.3147	2.24106	0	0.170734	up	0	TFs	FALSE	FALSE
LRRC8A	LRRC8A	9.66727e-05	1.17085	0.0991673	0.494416	0.884247	0.115753	TRUE	19.7812	2.15858	4.27931e-211	0.156197	down	2.93726e-210	Surface proteins	FALSE	TRUE
TUBB4B	TUBB4B	0.883896	4.27514	0.852599	1.26203	0.285375	0.714625	TRUE	25.7965	1.13613	0	0.475359	up	0	Surface proteins	FALSE	TRUE
CD151	CD151	-0.0014639	1.39479	0.0952549	0.712759	0.542571	0.457429	TRUE	27.5885	2.06652	0	0.0856151	down	0	Surface proteins	FALSE	FALSE
TEAD1	TEAD1	-0.00237464	1.36098	0.0963269	0.543369	0.522491	0.477509	TRUE	32.7054	2.3332	0	0.0869093	up	0	TFs	FALSE	FALSE
CD59	CD59	1.55184	3.53517	0.996135	0.837656	0.332748	0.667252	TRUE	22.224	1.24509	0	0.222525	up	0	Surface proteins	FALSE	FALSE
CD44	CD44	-0.00111494	1.35443	0.0986244	0.686206	0.889461	0.110539	TRUE	20.5652	1.5859	0	0.358852	down	0	Surface proteins	FALSE	TRUE
CD82	CD82	-0.00334814	1.27917	0.0968938	0.570525	0.67956	0.32044	TRUE	19.9807	1.85149	0	0.0823104	down	0	Surface proteins	FALSE	FALSE
BSCL2	BSCL2	-0.00234674	1.69283	0.0953231	0.717359	0.343588	0.656412	TRUE	25.8646	1.4186	0	0.196795	up	0	Surface proteins	FALSE	FALSE
PRSS23	PRSS23	0.000293252	1.88164	0.0971478	1.24303	0.779301	0.220699	TRUE	22.0001	1.42123	0	0.229995	down	0	Surface proteins	FALSE	FALSE
CTSC	CTSC	-0.00211268	1.62166	0.0970771	0.978957	0.712565	0.287435	TRUE	23.5264	1.23899	0	0.271333	down	0	Surface proteins	FALSE	FALSE
DYNC2H1	DYNC2H1	0.000363595	2.0741	0.093922	0.835968	0.271824	0.728176	TRUE	24.7269	1.08146	0	0.44467	up	0	Surface proteins	FALSE	FALSE
MPZL2	MPZL2	-0.000990962	1.25597	0.0988082	0.530608	0.697008	0.302992	TRUE	18.4283	2.00573	1.1177e-264	0.0681437	down	9.26837e-264	Surface proteins	FALSE	TRUE
SORL1	SORL1	0.000230687	1.14274	0.0998461	0.339229	0.867482	0.132518	TRUE	16.2889	2.98762	3.81855e-108	0.0612587	down	1.46569e-107	Surface proteins	FALSE	FALSE
ZNF487	ZNF487	-0.000468013	1.42365	0.0957918	0.5951	0.506768	0.493232	TRUE	32.3892	1.82491	0	0.210836	up	0	TFs	FALSE	FALSE
ARID5B	ARID5B	0.000477097	1.19747	0.0988618	0.424717	0.771059	0.228941	TRUE	14.8676	2.7377	3.20624e-129	0.0421342	down	1.42717e-128	TFs	FALSE	TRUE
FGFR2	FGFR2	-0.000184605	1.1427	0.0992366	0.342885	0.863796	0.136204	TRUE	18.6553	2.32039	2.78063e-183	0.105973	down	1.68114e-182	Surface proteins	FALSE	FALSE
CD4	CD4	-0.000869399	1.34527	0.0997689	0.539843	0.665619	0.334381	TRUE	36.8717	2.59484	0	0.178789	up	0	Surface proteins	FALSE	FALSE
GPRC5A	GPRC5A	-0.000973283	1.53678	0.0972324	0.865741	0.738523	0.261477	TRUE	22.5851	1.36325	0	0.220287	down	0	Surface proteins	FALSE	FALSE
EMP1	EMP1	-0.0024601	1.26147	0.0984762	0.743871	0.888408	0.111592	TRUE	20.8163	1.76286	7.31259e-297	0.28095	down	6.92112e-296	Surface proteins	FALSE	TRUE
NR4A1	NR4A1	-0.000399065	1.72263	0.0984406	1.07262	0.779123	0.220877	TRUE	19.0357	2.09795	1.25964e-238	0.0887482	down	9.53543e-238	TFs	TRUE	FALSE
TSPAN8	TSPAN8	1.36713e-05	2.04771	0.0982095	1.10191	0.773376	0.226624	TRUE	23.1143	1.15699	0	0.405616	down	0	Surface proteins	FALSE	FALSE
ELK3	ELK3	-0.00240724	1.39082	0.0968699	0.547728	0.508736	0.491264	TRUE	32.0952	1.96232	0	0.137349	up	0	TFs	FALSE	FALSE
ZNF664	ZNF664	-0.00638063	1.44984	0.0959549	0.616052	0.417697	0.582303	TRUE	27.8678	1.9389	0	0.100897	up	0	TFs	FALSE	FALSE
FOXA1	FOXA1	-0.00352238	1.4086	0.0958265	0.591079	0.445312	0.554688	TRUE	28.3618	2.62983	1.69699e-222	0.0516879	up	1.20636e-221	TFs	FALSE	TRUE
SIX1	SIX1	-0.00211503	1.32808	0.0970704	0.498824	0.512245	0.487755	TRUE	32.4295	3.40092	5.6435e-153	0.0351397	up	2.93046e-152	TFs	FALSE	TRUE
FOS	FOS	-0.0026474	2.77091	0.0957112	1.5109	0.39244	0.60756	TRUE	37.2024	3.63544	5.75253e-157	0.0381962	down	3.03727e-156	TFs	FALSE	TRUE
FOXN3	FOXN3	-0.000284466	1.17747	0.0986712	0.405462	0.784454	0.215546	TRUE	15.8031	2.64425	6.21353e-141	0.0490623	down	2.98191e-140	TFs	FALSE	FALSE
CASC4	CASC4	-0.00244948	1.36879	0.0962999	0.523814	0.453071	0.546929	TRUE	28.782	2.44458	2.42431e-261	0.061868	up	1.99413e-260	Surface proteins	FALSE	FALSE
SPPL2A	SPPL2A	-0.000268628	1.27751	0.0972014	0.455794	0.536478	0.463522	TRUE	34.1176	3.52582	1.36015e-150	0.0350285	up	6.9479e-150	Surface proteins	FALSE	FALSE
IDH2	IDH2	-0.00285519	1.36937	0.0971578	0.577061	0.483208	0.516792	TRUE	30.79	2.96698	3.37045e-190	0.0440899	up	2.10151e-189	Surface proteins	FALSE	TRUE
IGF1R	IGF1R	-0.00258888	1.26716	0.0969707	0.461482	0.587925	0.412075	TRUE	35.9935	2.77599	6.7814e-262	0.0705033	up	5.58935e-261	Surface proteins	FALSE	FALSE
MSLN	MSLN	7.75381e-06	2.13849	0.0978184	1.16718	0.851275	0.148725	TRUE	21.4451	1.40095	0	0.349284	down	0	Surface proteins	FALSE	TRUE
GLYR1	GLYR1	-0.00311473	1.26303	0.0984167	0.465315	0.583144	0.416856	TRUE	36.1765	2.97946	1.2377e-227	0.0588899	up	8.9465e-227	TFs	FALSE	FALSE
ZNF688	ZNF688	-0.00154433	1.26856	0.0978393	0.462541	0.628916	0.371084	TRUE	36.9618	2.59224	0	0.101547	up	0	TFs	FALSE	FALSE
IRX3	IRX3	-0.00158941	1.61291	0.0925914	0.705564	0.328228	0.671772	TRUE	18.9209	2.5887	6.42348e-167	0.0390779	up	3.58381e-166	TFs	FALSE	TRUE
CES1	CES1	-0.00245396	1.77181	0.0961419	0.812484	0.416174	0.583826	TRUE	29.0248	1.58558	0	0.191207	up	0	Surface proteins	FALSE	FALSE
CDH1	CDH1	-0.00140082	1.411	0.0963747	0.562599	0.417415	0.582585	TRUE	25.0906	3.16763	7.7356e-138	0.030852	up	3.66074e-137	Surface proteins	FALSE	TRUE
CHST6	CHST6	-0.00141328	1.31238	0.0978941	0.526437	0.621717	0.378283	TRUE	36.3363	2.42873	0	0.125415	up	0	Surface proteins	FALSE	TRUE
TMEM231	TMEM231	-0.000250625	2.06885	0.0959684	0.837352	0.28399	0.71601	TRUE	25.7802	1.13361	0	0.502974	up	0	Surface proteins	FALSE	FALSE
GALNS	GALNS	-0.00260111	1.29081	0.0984211	0.489185	0.591999	0.408001	TRUE	34.9313	2.18215	0	0.167223	up	0	Surface proteins	FALSE	FALSE
SERPINF1	SERPINF1	-0.00220535	1.56433	0.0933249	0.887578	0.452533	0.547467	TRUE	31.9679	2.99886	7.04188e-194	0.0454552	down	4.46916e-193	Surface proteins	TRUE	TRUE
CXCL16	CXCL16	-0.00110752	1.17341	0.0980766	0.413383	0.761225	0.238775	TRUE	15.6834	2.59008	1.27053e-147	0.0463571	down	6.3667e-147	Surface proteins	FALSE	TRUE
GRN	GRN	-0.000741967	1.25247	0.0973226	0.541608	0.7103	0.2897	TRUE	20.1611	1.75472	0	0.0998605	down	0	Surface proteins	FALSE	FALSE
VEZF1	VEZF1	-0.00222511	1.31491	0.0959891	0.501836	0.520972	0.479028	TRUE	32.9886	3.19851	2.4011e-176	0.0412981	up	1.41095e-175	TFs	FALSE	FALSE
CLTC	CLTC	-0.00143688	1.49537	0.0946216	0.615353	0.351784	0.648216	TRUE	20.5276	2.67417	4.14534e-165	0.038118	up	2.29553e-164	Surface proteins	FALSE	TRUE
BPTF	BPTF	-0.00133093	1.37933	0.0971589	0.56218	0.461708	0.538292	TRUE	28.9249	3.21722	7.05363e-152	0.0342773	up	3.63496e-151	TFs	FALSE	TRUE
ABCA5	ABCA5	-0.000798682	1.42232	0.0960517	0.618304	0.473082	0.526918	TRUE	30.4795	2.23564	0	0.0832201	up	0	Surface proteins	FALSE	FALSE
FOXJ1	FOXJ1	-0.00255137	2.33331	0.0963766	0.942083	0.266206	0.733794	TRUE	24.9659	1.0785	0	0.530345	up	0	TFs	FALSE	FALSE
SAFB	SAFB	-0.00130822	1.23908	0.0973181	0.424138	0.587047	0.412953	TRUE	37.0911	3.45608	2.52771e-173	0.042895	up	1.47054e-172	TFs	FALSE	TRUE
RFX2	RFX2	-0.00131845	1.61186	0.0955268	0.692691	0.389901	0.610099	TRUE	28.6008	1.43614	0	0.262808	up	0	TFs	FALSE	FALSE
C3	C3	-0.0019996	1.9671	0.0984361	1.09556	0.818898	0.181102	TRUE	21.9962	1.27236	0	0.371365	down	0	Surface proteins	FALSE	FALSE
PIN1	PIN1	-0.00053836	1.50416	0.0955536	0.601941	0.349876	0.650124	TRUE	23.1425	2.01914	0	0.0751129	up	0	TFs	FALSE	FALSE
SLC44A2	SLC44A2	-0.000258993	1.1738	0.0988337	0.389615	0.743786	0.256214	TRUE	15.1052	2.61554	1.23542e-143	0.0416395	down	6.0316e-143	Surface proteins	FALSE	FALSE
ZNF440	ZNF440	-0.0031952	1.26965	0.099991	0.469348	0.60954	0.39046	TRUE	35.6729	2.31251	0	0.139765	up	0	TFs	FALSE	FALSE
ADGRE5	ADGRE5	-0.00264312	1.30489	0.0972499	0.484209	0.593468	0.406532	TRUE	35.5357	2.4303	0	0.103218	up	0	Surface proteins	FALSE	FALSE
CEACAM6	CEACAM6	-0.0012165	2.10113	0.0958569	1.40918	0.64838	0.35162	TRUE	24.3925	1.40218	0	0.184258	down	0	Surface proteins	FALSE	FALSE
BCAM	BCAM	-0.00228533	1.36256	0.0950892	0.773514	0.725859	0.274141	TRUE	19.4011	1.90175	1.30961e-296	0.0894129	down	1.23379e-295	Surface proteins	FALSE	FALSE
FOSB	FOSB	-0.00240759	1.67401	0.0969968	0.958391	0.742526	0.257474	TRUE	18.6582	2.07468	3.66093e-245	0.0767723	down	2.85875e-244	TFs	FALSE	FALSE
SLC1A5	SLC1A5	-0.000761752	1.2089	0.0992589	0.483959	0.869966	0.130034	TRUE	20.1247	1.92284	1.98572e-264	0.177441	down	1.64497e-263	Surface proteins	FALSE	FALSE
ZSCAN18	ZSCAN18	-0.000796835	1.28141	0.0981978	0.471101	0.565196	0.434804	TRUE	34.4689	2.39361	0	0.0947627	up	0	TFs	FALSE	FALSE
A4GALT	A4GALT	-0.0001759	1.13953	0.0986333	0.385086	0.863879	0.136121	TRUE	16.501	2.92879	2.97031e-113	0.0633975	down	1.1766e-112	Surface proteins	FALSE	TRUE
CELSR1	CELSR1	-0.00613678	1.41191	0.095684	0.592683	0.43736	0.56264	TRUE	27.8836	2.56795	2.0406e-229	0.0533658	up	1.49084e-228	Surface proteins	FALSE	FALSE
TTLL10	TTLL10	-0.00140203	1.43576	0.0987989	0.581268	0.525715	0.474285	TRUE	33.1452	1.92488	0	0.256642	up	0	All genes	FALSE	FALSE
ANKRD65	ANKRD65	-0.00232655	1.35124	0.096814	0.507007	0.472418	0.527582	TRUE	29.4695	3.21517	6.9599e-155	0.0350626	up	3.63947e-154	All genes	FALSE	FALSE
CFAP74	CFAP74	-0.00085207	1.32019	0.0977194	0.499666	0.575891	0.424109	TRUE	34.3843	2.11747	0	0.22212	up	0	All genes	FALSE	FALSE
MORN1	MORN1	-0.00223834	1.25516	0.098607	0.442565	0.635524	0.364476	TRUE	36.2887	2.39826	0	0.152034	up	0	All genes	FALSE	FALSE
CLSTN1	CLSTN1	-0.00190972	1.39969	0.0957584	0.553633	0.41268	0.58732	TRUE	25.5917	2.70174	1.31104e-191	0.0438234	up	8.24374e-191	All genes	FALSE	FALSE
AGTRAP	AGTRAP	-0.00181918	1.39835	0.0963734	0.537848	0.461781	0.538219	TRUE	29.8331	1.99673	0	0.105901	up	0	All genes	FALSE	FALSE
C1orf158	C1orf158	-0.00318805	1.39636	0.0982175	0.536553	0.523848	0.476152	TRUE	33.0372	1.90823	0	0.258574	up	0	All genes	FALSE	FALSE
FHAD1	FHAD1	-0.000196428	1.67593	0.0963128	0.699326	0.397565	0.602435	TRUE	29.7997	1.49596	0	0.367546	up	0	All genes	FALSE	FALSE
CROCC	CROCC	-0.00226131	1.43607	0.0959982	0.597758	0.521246	0.478754	TRUE	32.8048	1.87937	0	0.202645	up	0	All genes	FALSE	FALSE
AKR7A2	AKR7A2	-0.00181292	1.59799	0.0967375	0.678316	0.334969	0.665031	TRUE	23.0926	1.84739	0	0.0911688	up	0	All genes	FALSE	FALSE
MINOS1	MINOS1	-0.00417153	1.79924	0.0924176	0.790754	0.259883	0.740117	TRUE	16.7114	1.96837	4.79787e-259	0.0667168	up	3.89166e-258	All genes	FALSE	FALSE
UBXN10	UBXN10	-0.000474798	1.62577	0.0961562	0.674496	0.404919	0.595081	TRUE	29.7831	1.49335	0	0.333535	up	0	All genes	FALSE	FALSE
TCEA3	TCEA3	-0.00130495	1.23679	0.0983822	0.497142	0.789619	0.210381	TRUE	20.0053	1.88247	2.43333e-300	0.115845	down	2.32461e-299	All genes	FALSE	FALSE
GALE	GALE	8.45542e-05	1.13785	0.100174	0.353164	0.867704	0.132296	TRUE	16.75	2.84807	1.82251e-119	0.0684349	down	7.55647e-119	All genes	FALSE	FALSE
RCAN3	RCAN3	-0.000805729	1.29533	0.0959931	0.495151	0.56946	0.43054	TRUE	34.4809	2.2561	0	0.116671	up	0	All genes	FALSE	FALSE
UBXN11	UBXN11	-0.00454921	1.84678	0.0975788	0.738677	0.304345	0.695655	TRUE	25.9087	1.16877	0	0.390223	up	0	All genes	FALSE	FALSE
SFN	SFN	-0.00096606	1.44994	0.0971697	0.959177	0.818088	0.181912	TRUE	21.1123	1.60288	0	0.208057	down	0	All genes	FALSE	FALSE
NUDC	NUDC	-0.00311891	2.35334	0.0938208	0.992005	0.16569	0.83431	TRUE	17.7297	1.09541	0	0.273649	up	0	All genes	FALSE	FALSE
SYTL1	SYTL1	-0.00382012	1.47425	0.0958083	0.598399	0.380456	0.619544	TRUE	22.504	2.8248	2.31426e-158	0.036033	up	1.23065e-157	All genes	FALSE	FALSE
CD164L2	CD164L2	-0.00205893	1.99387	0.0942907	0.853247	0.318456	0.681544	TRUE	27.0122	1.23076	0	0.426423	up	0	All genes	TRUE	FALSE
IFI6	IFI6	-0.00116408	1.49808	0.0944068	0.811097	0.51731	0.48269	TRUE	33.9592	3.29206	5.56363e-172	0.0405669	up	3.20931e-171	All genes	FALSE	FALSE
TRNAU1AP	TRNAU1AP	-0.00179701	1.26603	0.0971445	0.452164	0.571342	0.428658	TRUE	35.3859	2.87247	1.26081e-238	0.0612257	up	9.53545e-238	All genes	FALSE	FALSE
DCDC2B	DCDC2B	-0.00290736	1.6802	0.096456	0.696518	0.409496	0.590504	TRUE	30.3618	1.56738	0	0.380661	up	0	All genes	FALSE	FALSE
MARCKSL1	MARCKSL1	0.000159914	1.39482	0.0990825	0.688721	0.83349	0.16651	TRUE	21.5443	1.43872	0	0.289783	down	0	All genes	FALSE	FALSE
TEKT2	TEKT2	-0.00160097	1.78444	0.092697	0.777588	0.358107	0.641893	TRUE	28.6615	1.37826	0	0.405499	up	0	All genes	FALSE	FALSE
OSCP1	OSCP1	-0.00268973	1.8047	0.0941598	0.749601	0.336232	0.663768	TRUE	27.2602	1.26583	0	0.366906	up	0	All genes	FALSE	FALSE
MEAF6	MEAF6	-0.00503152	1.64881	0.0950875	0.687075	0.288343	0.711657	TRUE	20.4118	1.73892	0	0.0956338	up	0	All genes	FALSE	FALSE
DNALI1	DNALI1	-0.00348396	2.33254	0.094235	0.94333	0.239375	0.760625	TRUE	23.3881	1.00376	0	0.502219	up	0	All genes	TRUE	FALSE
MYCBP	MYCBP	-0.00305747	1.97931	0.0954442	0.850464	0.254852	0.745148	TRUE	22.1307	1.211	0	0.237943	up	0	All genes	FALSE	FALSE
MACF1	MACF1	-0.00186127	1.37272	0.0953591	0.54864	0.445609	0.554391	TRUE	27.9997	2.78626	7.74759e-196	0.0449381	up	4.93622e-195	All genes	FALSE	FALSE
ZMYND12	ZMYND12	-0.000845157	1.32033	0.0970545	0.483677	0.591675	0.408325	TRUE	34.7776	2.16307	0	0.194837	up	0	All genes	FALSE	FALSE
CCDC30	CCDC30	-0.00183384	1.51037	0.0967213	0.605932	0.445357	0.554643	TRUE	30.6991	1.60227	0	0.277772	up	0	All genes	FALSE	FALSE
FAM183A	FAM183A	5.07419e-05	3.67037	0.099347	1.10884	0.209784	0.790216	TRUE	21.496	1.06513	0	0.753892	up	0	All genes	TRUE	FALSE
EBNA1BP2	EBNA1BP2	-0.00311812	1.29513	0.0973131	0.465647	0.553055	0.446945	TRUE	34.9573	3.30637	2.27511e-176	0.042272	up	1.33787e-175	All genes	FALSE	FALSE
CFAP57	CFAP57	-0.000630391	1.47978	0.0980846	0.589789	0.473469	0.526531	TRUE	31.7542	1.72788	0	0.290701	up	0	All genes	FALSE	FALSE
CCDC24	CCDC24	-0.00349574	1.36568	0.0966021	0.531603	0.481281	0.518719	TRUE	31.0342	1.83959	0	0.149271	up	0	All genes	FALSE	FALSE
C1orf228	C1orf228	-0.00303554	1.27747	0.0988616	0.454745	0.643097	0.356903	TRUE	36.1323	2.43913	0	0.18993	up	0	All genes	FALSE	FALSE
TCTEX1D4	TCTEX1D4	-0.00113104	1.60268	0.0960963	0.705225	0.4667	0.5333	TRUE	31.7342	1.72699	0	0.29891	up	0	All genes	FALSE	FALSE
PDZK1IP1	PDZK1IP1	-0.00158074	1.31115	0.0975611	0.749186	0.807921	0.192079	TRUE	20.7721	1.68442	0	0.171621	down	0	All genes	FALSE	FALSE
SPATA6	SPATA6	-0.00143303	1.46621	0.0964934	0.600981	0.45598	0.54402	TRUE	30.5315	1.65891	0	0.204992	up	0	All genes	FALSE	FALSE
AGBL4	AGBL4	0.00130291	1.22199	0.0982986	0.407869	0.673865	0.326135	TRUE	37.0671	2.6097	0	0.170252	up	0	All genes	FALSE	FALSE
HSPB11	HSPB11	-0.00329776	2.00311	0.0930691	0.877104	0.217536	0.782464	TRUE	19.5195	1.25592	0	0.197719	up	0	All genes	FALSE	FALSE
LDLRAD1	LDLRAD1	-0.00528077	2.17622	0.0954953	0.902013	0.297262	0.702738	TRUE	26.7518	1.22089	0	0.535335	up	0	All genes	FALSE	FALSE
SSBP3	SSBP3	-0.000852854	1.30451	0.0979584	0.510201	0.554444	0.445556	TRUE	34.3815	2.60675	3.62759e-281	0.0734857	up	3.22417e-280	All genes	FALSE	FALSE
C1orf168	C1orf168	-0.00268055	1.34932	0.0971799	0.552584	0.574365	0.425635	TRUE	35.0154	2.43112	0	0.0959794	up	0	All genes	FALSE	FALSE
C1orf87	C1orf87	-0.00428546	1.47845	0.0962614	0.591046	0.496285	0.503715	TRUE	32.3258	1.80404	0	0.271571	up	0	All genes	FALSE	FALSE
TCTEX1D1	TCTEX1D1	-0.00187339	1.53877	0.0966789	0.622265	0.423787	0.576213	TRUE	30.3129	1.55181	0	0.317352	up	0	All genes	FALSE	FALSE
WDR78	WDR78	-0.00391244	1.84262	0.0961224	0.760187	0.337181	0.662819	TRUE	27.9107	1.30813	0	0.438766	up	0	All genes	FALSE	FALSE
C1orf141	C1orf141	-0.000570215	1.35173	0.0985918	0.546785	0.636073	0.363927	TRUE	35.9896	2.43636	0	0.20036	up	0	All genes	FALSE	FALSE
GNG12	GNG12	-0.000919746	1.28395	0.0985622	0.463593	0.580247	0.419753	TRUE	35.7969	2.87053	1.58308e-242	0.0632237	up	1.21757e-241	All genes	FALSE	TRUE
WLS	WLS	-0.00399844	1.43048	0.0962287	0.573672	0.427966	0.572034	TRUE	27.821	2.13928	0	0.0799696	up	0	All genes	FALSE	FALSE
ERICH3	ERICH3	-0.00196813	2.10494	0.0954823	0.857295	0.298411	0.701589	TRUE	26.7877	1.22522	0	0.537611	up	0	All genes	FALSE	FALSE
TTLL7	TTLL7	-0.00113314	1.25458	0.0984064	0.442618	0.657598	0.342402	TRUE	36.9299	2.51794	0	0.15189	up	0	All genes	FALSE	FALSE
WDR63	WDR63	-0.00319804	1.44397	0.0965245	0.575597	0.499966	0.500034	TRUE	32.4535	1.82366	0	0.274025	up	0	All genes	FALSE	FALSE
DDAH1	DDAH1	-0.00156255	1.27378	0.0976542	0.462336	0.572435	0.427565	TRUE	35.1175	2.65538	4.29451e-278	0.0741348	up	3.77178e-277	All genes	FALSE	FALSE
ODF2L	ODF2L	-0.00292785	1.80884	0.0956343	0.782671	0.240083	0.759917	TRUE	20.4243	1.32081	0	0.179679	up	0	All genes	FALSE	TRUE
EVI5	EVI5	-0.00184235	1.25668	0.0986539	0.444985	0.598739	0.401261	TRUE	37.1223	3.12219	1.00603e-213	0.0557622	up	6.95789e-213	All genes	FALSE	TRUE
GCLM	GCLM	-0.00274052	1.36586	0.0967041	0.534525	0.504187	0.495813	TRUE	31.8083	2.18985	0	0.0960904	up	0	All genes	FALSE	FALSE
PALMD	PALMD	-0.00114873	1.36794	0.0981928	0.539084	0.534879	0.465121	TRUE	33.13	2.13538	0	0.117596	up	0	All genes	FALSE	FALSE
SLC35A3	SLC35A3	-0.00211224	1.27779	0.0993296	0.452639	0.551647	0.448353	TRUE	34.6996	3.13811	2.29221e-194	0.0471241	up	1.45589e-193	All genes	FALSE	TRUE
C1orf194	C1orf194	-0.00239039	3.42438	0.0981773	1.10726	0.219281	0.780719	TRUE	22.3134	1.01002	0	0.716841	up	0	All genes	TRUE	FALSE
PSMA5	PSMA5	-0.00283724	1.42397	0.0947465	0.563132	0.407974	0.592026	TRUE	24.4536	3.02778	1.82973e-147	0.0331816	up	9.1576e-147	All genes	FALSE	TRUE
DRAM2	DRAM2	-0.00311577	1.43571	0.0955276	0.590586	0.47117	0.52883	TRUE	30.4782	1.95809	0	0.117084	up	0	All genes	FALSE	FALSE
PIFO	PIFO	-0.00575092	3.25954	0.096336	1.10335	0.215289	0.784711	TRUE	22.0999	0.995988	0	0.699789	up	0	All genes	TRUE	FALSE
RHOC	RHOC	-0.00154848	1.34389	0.0972007	0.640106	0.656879	0.343121	TRUE	22.7109	1.63046	0	0.119065	down	0	All genes	FALSE	FALSE
PHTF1	PHTF1	-0.00298066	1.32289	0.0967143	0.500037	0.563365	0.436635	TRUE	34.0054	2.06048	0	0.166694	up	0	All genes	FALSE	FALSE
HIPK1	HIPK1	-0.0033293	1.71759	0.0961458	0.737396	0.32607	0.67393	TRUE	25.6616	1.31288	0	0.241659	up	0	All genes	FALSE	FALSE
RP4-666F24.3	RP4-666F24.3	7.99996e-06	1.57466	0.095136	0.67101	0.454693	0.545307	TRUE	31.4316	1.68869	0	0.312236	up	0	All genes	FALSE	FALSE
FAM46C	FAM46C	-0.000585097	1.19072	0.0977147	0.481819	0.841594	0.158406	TRUE	14.5568	3.21376	5.59759e-92	0.0438792	down	1.89951e-91	All genes	FALSE	FALSE
SPAG17	SPAG17	-0.000455567	2.00279	0.0956547	0.814448	0.310776	0.689224	TRUE	27.1546	1.24875	0	0.502346	up	0	All genes	FALSE	FALSE
PDE4DIP	PDE4DIP	-0.00407503	1.41529	0.0976017	0.582874	0.464525	0.535475	TRUE	30.128	2.01201	0	0.106009	up	0	All genes	FALSE	FALSE
CTSS	CTSS	-0.0018739	2.0464	0.0937686	0.86369	0.228299	0.771701	TRUE	21.4106	1.10791	0	0.291672	up	0	All genes	FALSE	FALSE
PSMD4	PSMD4	-0.00149773	1.35002	0.0966144	0.514485	0.455053	0.544947	TRUE	28.1444	3.20423	3.8376e-149	0.0335602	up	1.94935e-148	All genes	FALSE	FALSE
RIIAD1	RIIAD1	-0.00151283	1.75867	0.0962113	0.736492	0.394743	0.605257	TRUE	29.753	1.4918	0	0.374871	up	0	All genes	FALSE	FALSE
S100A9	S100A9	0.000947722	1.52459	0.0976849	1.01204	0.889199	0.110801	TRUE	20.5358	1.75312	1.01584e-291	0.279701	down	9.46105e-291	All genes	FALSE	TRUE
S100A2	S100A2	2.39042e-05	2.65306	0.097661	2.00017	0.784868	0.215132	TRUE	22.5213	1.30403	0	0.296985	down	0	All genes	TRUE	TRUE
S100A16	S100A16	0.000723303	1.55816	0.0974435	0.883721	0.790446	0.209554	TRUE	22.6301	1.16546	0	0.433334	down	0	All genes	FALSE	FALSE
S100A14	S100A14	-0.000686924	1.64166	0.0974321	0.97094	0.771696	0.228304	TRUE	23.1741	1.17046	0	0.404758	down	0	All genes	TRUE	FALSE
C1orf189	C1orf189	-0.00318336	1.84068	0.0959642	0.865395	0.49161	0.50839	TRUE	32.3895	1.81539	0	0.277762	up	0	All genes	FALSE	FALSE
MTX1	MTX1	-0.00101975	1.27094	0.0979079	0.450909	0.53781	0.46219	TRUE	34.1459	3.45026	1.89492e-157	0.0368183	up	1.00244e-156	All genes	FALSE	TRUE
HDGF	HDGF	-0.00448823	1.42168	0.0960025	0.580198	0.420533	0.579467	TRUE	26.8471	2.442	2.1144e-244	0.0570723	up	1.6448e-243	All genes	FALSE	FALSE
LRRC71	LRRC71	-0.00103507	1.4408	0.0969273	0.573659	0.488549	0.511451	TRUE	32.2161	1.79298	0	0.287609	up	0	All genes	FALSE	FALSE
DUSP23	DUSP23	-0.0027732	1.47329	0.0934148	0.877772	0.544826	0.455174	TRUE	27.0443	2.06894	0	0.083191	down	0	All genes	FALSE	FALSE
CFAP45	CFAP45	-0.00576763	1.70759	0.0972407	0.710762	0.370702	0.629298	TRUE	29.0709	1.42081	0	0.403273	up	0	All genes	FALSE	FALSE
KLHDC9	KLHDC9	-0.0023939	1.35873	0.0975863	0.531296	0.54275	0.45725	TRUE	33.3664	1.9667	0	0.180899	up	0	All genes	FALSE	FALSE
UFC1	UFC1	0.737843	3.14053	0.717393	1.00395	0.254078	0.745922	TRUE	20.5053	1.06513	0	0.313706	up	0	All genes	TRUE	TRUE
PPOX	PPOX	-0.000250998	1.36943	0.0954408	0.548353	0.539616	0.460384	TRUE	33.2793	1.99553	0	0.158884	up	0	All genes	FALSE	FALSE
SDHC	SDHC	-0.00236995	1.59805	0.0931826	0.644298	0.299455	0.700545	TRUE	16.9318	2.37778	3.89747e-184	0.0445965	up	2.37041e-183	All genes	FALSE	TRUE
CFAP126	CFAP126	-0.00271735	2.16727	0.0974379	0.840529	0.296909	0.703091	TRUE	26.6177	1.20975	0	0.539848	up	0	All genes	FALSE	FALSE
CCDC190	CCDC190	-0.00117219	1.45058	0.0966547	0.622022	0.642176	0.357824	TRUE	36.263	2.46998	0	0.189101	up	0	All genes	FALSE	FALSE
NME7	NME7	-0.00233252	1.45434	0.0978938	0.583915	0.464993	0.535007	TRUE	30.7898	1.69045	0	0.198752	up	0	All genes	FALSE	FALSE
CCDC181	CCDC181	-0.000537266	1.39786	0.0974514	0.576071	0.574449	0.425551	TRUE	34.4041	2.11381	0	0.215111	up	0	All genes	FALSE	FALSE
KIFAP3	KIFAP3	-0.000973287	1.33525	0.0973676	0.507615	0.526569	0.473431	TRUE	32.7167	2.08323	0	0.121379	up	0	All genes	FALSE	FALSE
FMO2	FMO2	-0.000749953	1.5669	0.0973421	0.901391	0.749867	0.250133	TRUE	22.4044	1.36933	0	0.2256	down	0	All genes	FALSE	FALSE
RABGAP1L	RABGAP1L	-0.00101046	1.29321	0.0983049	0.473782	0.542291	0.457709	TRUE	34.4836	3.45797	1.55793e-158	0.037235	up	8.30083e-158	All genes	FALSE	FALSE
CACYBP	CACYBP	-0.00238187	1.35027	0.0968393	0.533024	0.498967	0.501033	TRUE	31.662	3.54555	3.42872e-137	0.0310772	up	1.61045e-136	All genes	FALSE	TRUE
SOAT1	SOAT1	-0.000332765	1.25188	0.0981212	0.437358	0.608211	0.391789	TRUE	36.6135	2.71888	4.00841e-280	0.0799465	up	3.55877e-279	All genes	FALSE	FALSE
ARPC5	ARPC5	-0.00220285	1.21806	0.0979071	0.4663	0.677635	0.322365	TRUE	14.7634	2.73667	8.88059e-133	0.0316369	down	4.05007e-132	All genes	FALSE	TRUE
APOBEC4	APOBEC4	-0.00181257	1.41884	0.0996387	0.579507	0.558416	0.441584	TRUE	34.0559	2.09443	0	0.256436	up	0	All genes	FALSE	FALSE
PHLDA3	PHLDA3	-0.00073439	1.14985	0.0993118	0.399285	0.863914	0.136086	TRUE	16.7214	2.90305	3.2635e-116	0.0649772	down	1.31831e-115	All genes	FALSE	TRUE
RNPEP	RNPEP	-0.00131832	1.28546	0.0978379	0.471387	0.54534	0.45466	TRUE	34.2927	3.05479	2.01137e-202	0.0490973	up	1.33243e-201	All genes	FALSE	TRUE
ADIPOR1	ADIPOR1	-0.00254363	1.47172	0.0962674	0.596118	0.372371	0.627629	TRUE	21.3434	2.95433	7.91043e-140	0.0317028	up	3.78071e-139	All genes	FALSE	TRUE
CYB5R1	CYB5R1	-0.0027199	1.37596	0.0958616	0.536709	0.469088	0.530912	TRUE	29.5593	2.79442	1.64919e-205	0.0476399	up	1.10869e-204	All genes	FALSE	FALSE
SERTAD4-AS1	SERTAD4-AS1	-0.00375787	1.32009	0.0954408	0.522817	0.540737	0.459263	TRUE	33.9145	2.75731	3.30815e-246	0.0615278	up	2.5907e-245	All genes	FALSE	FALSE
RP11-122M14.1	RP11-122M14.1	-0.00108506	1.2291	0.0983717	0.422832	0.66201	0.33799	TRUE	36.6868	2.54742	0	0.17976	up	0	All genes	FALSE	FALSE
SMYD2	SMYD2	-0.00364651	1.50364	0.09671	0.632565	0.439727	0.560273	TRUE	29.8529	1.63899	0	0.190665	up	0	All genes	FALSE	FALSE
SPATA17	SPATA17	-0.00233766	1.55438	0.0961872	0.632789	0.435959	0.564041	TRUE	30.767	1.60461	0	0.321511	up	0	All genes	FALSE	FALSE
IARS2	IARS2	-0.00215394	1.29795	0.0985205	0.480194	0.541872	0.458128	TRUE	34.3187	3.24805	6.70444e-179	0.0426031	up	3.99139e-178	All genes	FALSE	FALSE
SUSD4	SUSD4	-0.00110383	1.10704	0.0995826	0.292293	0.884043	0.115957	TRUE	16.6213	3.09735	2.21679e-101	0.0654907	down	8.06537e-101	All genes	FALSE	FALSE
CAPN8	CAPN8	0.000117741	1.23023	0.0995468	0.473513	0.892348	0.107652	TRUE	20.9362	1.7314	0	0.286968	down	0	All genes	FALSE	FALSE
ENAH	ENAH	-0.00209214	1.52085	0.0940025	0.66171	0.381639	0.618361	TRUE	25.8571	1.9272	0	0.0926252	up	0	All genes	FALSE	FALSE
PYCR2	PYCR2	-0.00160061	1.30048	0.096605	0.48206	0.562766	0.437234	TRUE	34.5275	2.52589	7.02172e-302	0.0811612	up	6.76338e-301	All genes	FALSE	FALSE
C1orf101	C1orf101	-0.00298442	1.2705	0.0978044	0.485614	0.730576	0.269424	TRUE	37.5639	3.06662	1.65864e-239	0.174055	up	1.25792e-238	All genes	FALSE	TRUE
EFCAB2	EFCAB2	-0.00350617	1.52448	0.0948789	0.641072	0.410176	0.589824	TRUE	29.0727	1.50684	0	0.233381	up	0	All genes	FALSE	FALSE
SCCPDH	SCCPDH	-0.00509794	1.42233	0.096557	0.570898	0.446043	0.553957	TRUE	29.0317	2.06365	0	0.092757	up	0	All genes	FALSE	FALSE
ADI1	ADI1	-0.00263009	1.31102	0.0961989	0.545254	0.580276	0.419724	TRUE	23.5565	2.89491	2.71147e-156	0.0353875	down	1.42793e-155	All genes	FALSE	FALSE
C2orf50	C2orf50	-0.00329368	1.22754	0.0991531	0.403426	0.671869	0.328131	TRUE	36.9873	2.59515	0	0.171858	up	0	All genes	FALSE	TRUE
WDR35	WDR35	-0.00245033	1.26835	0.0985576	0.44651	0.603306	0.396694	TRUE	35.4043	2.27872	0	0.139124	up	0	All genes	FALSE	FALSE
SDC1	SDC1	-0.000582441	1.44344	0.0975838	0.776548	0.787045	0.212955	TRUE	22.657	1.25558	0	0.338188	down	0	All genes	FALSE	FALSE
PUM2	PUM2	-0.00169724	1.28094	0.0973362	0.475358	0.541257	0.458743	TRUE	34.7688	3.79533	9.59381e-133	0.0306468	up	4.3729e-132	All genes	FALSE	TRUE
TP53I3	TP53I3	-0.00210109	1.14858	0.099762	0.376851	0.844874	0.155126	TRUE	17.3142	2.61646	5.57392e-145	0.0713504	down	2.73769e-144	All genes	FALSE	TRUE
DRC1	DRC1	-0.00213988	1.72976	0.0962761	0.720147	0.362124	0.637876	TRUE	28.8114	1.39421	0	0.409522	up	0	All genes	FALSE	FALSE
MAPRE3	MAPRE3	-0.00377955	1.49095	0.0957301	0.605522	0.425526	0.574474	TRUE	29.6676	1.54026	0	0.240063	up	0	All genes	FALSE	FALSE
IFT172	IFT172	-0.00452445	1.60656	0.0957009	0.679136	0.362226	0.637774	TRUE	27.166	1.38987	0	0.236722	up	0	All genes	FALSE	FALSE
RBKS	RBKS	-0.00285567	1.21972	0.0983319	0.411303	0.657549	0.342451	TRUE	37.4753	2.59951	0	0.12154	up	0	All genes	FALSE	FALSE
PPP1CB	PPP1CB	-0.00333619	1.55817	0.0939286	0.661915	0.315802	0.684198	TRUE	19.8217	2.20516	3.51088e-233	0.0561834	up	2.58583e-232	All genes	FALSE	TRUE
FAM179A	FAM179A	-0.00116847	1.51532	0.0955718	0.639238	0.461464	0.538536	TRUE	31.462	1.68929	0	0.292292	up	0	All genes	FALSE	FALSE
LBH	LBH	-0.00380941	1.40172	0.0968404	0.646956	0.528361	0.471639	TRUE	33.8639	2.99286	6.6495e-208	0.0503181	up	4.49984e-207	All genes	FALSE	TRUE
CAPN13	CAPN13	-0.000254621	1.32718	0.0986106	0.750419	0.826139	0.173861	TRUE	19.825	1.92393	1.19158e-273	0.13721	down	1.03102e-272	All genes	FALSE	TRUE
SRD5A2	SRD5A2	-0.000636906	1.33491	0.0979372	0.519221	0.654184	0.345816	TRUE	36.3477	2.55468	0	0.203884	up	0	All genes	FALSE	FALSE
DPY30	DPY30	-0.00422962	2.00298	0.093324	0.887355	0.209716	0.790284	TRUE	18.3256	1.33805	0	0.165131	up	0	All genes	FALSE	FALSE
CDC42EP3	CDC42EP3	-0.00334019	1.38584	0.0963159	0.582775	0.51782	0.48218	TRUE	32.6175	2.37847	0	0.0820532	up	0	All genes	FALSE	FALSE
MORN2	MORN2	-0.000441095	3.07225	0.0941833	1.19205	0.179133	0.820867	TRUE	19.8962	0.952692	0	0.502197	up	0	All genes	TRUE	FALSE
DYNC2LI1	DYNC2LI1	-0.00325613	1.48654	0.0962321	0.613785	0.421813	0.578187	TRUE	29.0022	1.61502	0	0.179463	up	0	All genes	FALSE	FALSE
C2orf73	C2orf73	-0.000883075	1.42847	0.0973047	0.576705	0.525161	0.474839	TRUE	33.1052	1.91682	0	0.253837	up	0	All genes	FALSE	FALSE
SPTBN1	SPTBN1	-0.00275438	1.70818	0.0940816	0.737394	0.280758	0.719242	TRUE	21.8541	1.46913	0	0.146705	up	0	All genes	FALSE	FALSE
CFAP36	CFAP36	-0.000800114	1.60312	0.0949361	0.713972	0.375822	0.624178	TRUE	27.0621	1.54704	0	0.169999	up	0	All genes	FALSE	FALSE
PPP4R3B	PPP4R3B	-0.00438126	1.41309	0.0953394	0.575042	0.429119	0.570881	TRUE	28.3689	1.96069	0	0.101037	up	0	All genes	FALSE	FALSE
KIAA1841	KIAA1841	-0.00182465	1.35341	0.0967566	0.520124	0.528613	0.471387	TRUE	32.8284	2.02618	0	0.135872	up	0	All genes	FALSE	FALSE
XPO1	XPO1	-0.0026939	1.25498	0.0982268	0.43818	0.569475	0.430525	TRUE	36.5279	3.72872	8.29703e-146	0.0347141	up	4.10231e-145	All genes	FALSE	TRUE
FAM161A	FAM161A	-0.000922463	1.26445	0.0990311	0.459229	0.651745	0.348255	TRUE	37.0603	2.52541	0	0.134855	up	0	All genes	FALSE	FALSE
GFPT1	GFPT1	-0.00125842	1.32464	0.0969765	0.504367	0.518143	0.481857	TRUE	32.6301	2.88144	4.57686e-215	0.0514482	up	3.17619e-214	All genes	FALSE	TRUE
CCT7	CCT7	-0.00391488	1.42839	0.0948526	0.569402	0.401967	0.598033	TRUE	24.5474	2.78076	9.24692e-175	0.0397704	up	5.41814e-174	All genes	FALSE	TRUE
ALMS1	ALMS1	-0.00359834	1.32061	0.0981021	0.503686	0.590845	0.409155	TRUE	35.0548	2.23599	0	0.139068	up	0	All genes	FALSE	FALSE
MOB1A	MOB1A	-0.00334581	1.32789	0.0971668	0.498848	0.494775	0.505225	TRUE	31.1389	3.39076	2.30595e-147	0.033476	up	1.15269e-146	All genes	FALSE	TRUE
C2orf81	C2orf81	-0.00101672	1.27791	0.0979752	0.453091	0.628169	0.371831	TRUE	35.8438	2.3431	0	0.177224	up	0	All genes	FALSE	FALSE
WDR54	WDR54	-0.000915317	2.31847	0.095193	0.896046	0.251615	0.748385	TRUE	24.0681	1.02783	0	0.53228	up	0	All genes	FALSE	FALSE
WBP1	WBP1	-0.000609393	1.33405	0.0972992	0.489632	0.481534	0.518466	TRUE	30.2379	2.83784	5.13757e-204	0.0474482	up	3.43121e-203	All genes	FALSE	FALSE
DNAH6	DNAH6	-0.00349025	1.76954	0.0982777	0.722711	0.361349	0.638651	TRUE	28.5964	1.37138	0	0.400694	up	0	All genes	FALSE	FALSE
CAPG	CAPG	-0.000896839	1.20172	0.0981994	0.495498	0.79772	0.20228	TRUE	17.4266	2.41417	1.78932e-173	0.0666705	down	1.04171e-172	All genes	FALSE	FALSE
SFTPB	SFTPB	-0.00103641	2.66074	0.0957866	2.28987	0.644333	0.355667	TRUE	22.2234	1.8217	0	0.0912572	down	0	All genes	TRUE	TRUE
TEKT4	TEKT4	-0.00245165	1.4205	0.0970117	0.573532	0.521835	0.478165	TRUE	33.0634	1.91393	0	0.261176	up	0	All genes	FALSE	FALSE
VWA3B	VWA3B	-0.00553984	1.69478	0.0964447	0.722166	0.389401	0.610599	TRUE	29.599	1.47422	0	0.373861	up	0	All genes	FALSE	FALSE
KIAA1211L	KIAA1211L	-0.0033914	1.44543	0.0969824	0.603993	0.495822	0.504178	TRUE	31.8868	1.79888	0	0.190635	up	0	All genes	FALSE	FALSE
TSGA10	TSGA10	-0.00370053	1.46387	0.0962358	0.596167	0.451273	0.548727	TRUE	30.5534	1.62408	0	0.230114	up	0	All genes	FALSE	FALSE
TBC1D8	TBC1D8	-0.00527767	1.40132	0.0960363	0.561282	0.470338	0.529662	TRUE	30.4624	1.93252	0	0.121272	up	0	All genes	FALSE	FALSE
FHL2	FHL2	-0.00156942	1.35786	0.0976622	0.697671	0.867059	0.132941	TRUE	21.0065	1.40276	0	0.420138	down	0	All genes	FALSE	TRUE
C2orf40	C2orf40	-0.000906636	3.0096	0.0974594	1.24065	0.290812	0.709188	TRUE	26.1554	1.16522	0	0.527401	up	0	All genes	FALSE	FALSE
GCC2	GCC2	-0.000581798	1.71547	0.0933719	0.738746	0.267779	0.732221	TRUE	20.9637	1.47855	0	0.140213	up	0	All genes	FALSE	FALSE
LIMS1	LIMS1	-0.00192283	1.38557	0.0973966	0.567088	0.499504	0.500496	TRUE	31.6648	2.58778	1.8589e-258	0.0627693	up	1.50331e-257	All genes	FALSE	FALSE
MALL	MALL	-0.000495189	1.22444	0.0979908	0.5244	0.818342	0.181658	TRUE	19.3003	2.0853	2.04174e-237	0.105959	down	1.53704e-236	All genes	FALSE	FALSE
NPHP1	NPHP1	-0.00319839	1.58131	0.0958534	0.649082	0.410859	0.589141	TRUE	29.5904	1.48862	0	0.291271	up	0	All genes	FALSE	FALSE
CHCHD5	CHCHD5	-0.00176699	1.54378	0.0954125	0.641015	0.334341	0.665659	TRUE	21.3335	2.18207	1.26427e-250	0.0599688	up	1.00257e-249	All genes	FALSE	FALSE
RABL2A	RABL2A	-0.00250767	1.62549	0.0952643	0.695969	0.408223	0.591777	TRUE	29.5526	1.48725	0	0.287971	up	0	All genes	FALSE	FALSE
STEAP3	STEAP3	-0.00218916	1.2836	0.0980403	0.476258	0.571912	0.428088	TRUE	37.0987	3.93225	1.73721e-133	0.0316149	up	7.94487e-133	All genes	FALSE	FALSE
CFAP221	CFAP221	-0.00269447	1.84027	0.0953517	0.744636	0.3399	0.6601	TRUE	27.9958	1.31641	0	0.439604	up	0	All genes	FALSE	FALSE
CCDC74B	CCDC74B	-0.00257333	1.53818	0.0963436	0.638771	0.462114	0.537886	TRUE	31.4989	1.69515	0	0.299932	up	0	All genes	FALSE	FALSE
CCDC74A	CCDC74A	-0.00185165	1.75839	0.0964353	0.763831	0.383133	0.616867	TRUE	29.3907	1.45155	0	0.375215	up	0	All genes	FALSE	FALSE
MAP3K19	MAP3K19	-0.00310503	1.48958	0.0962343	0.607386	0.477172	0.522828	TRUE	31.9828	1.76334	0	0.301174	up	0	All genes	FALSE	FALSE
HNMT	HNMT	-0.000723654	1.31267	0.0951326	0.607433	0.703306	0.296694	TRUE	20.1076	1.76484	0	0.0971657	down	0	All genes	FALSE	FALSE
GALNT3	GALNT3	-0.0019286	1.32248	0.0979614	0.499195	0.509295	0.490705	TRUE	32.1089	2.884	8.41983e-211	0.0499928	up	5.7744e-210	All genes	FALSE	TRUE
TTC21B	TTC21B	-0.00040944	1.29445	0.0972839	0.481512	0.593089	0.406911	TRUE	35.024	2.21051	0	0.150547	up	0	All genes	FALSE	FALSE
CCDC173	CCDC173	-0.000947794	1.76924	0.0954822	0.773496	0.370634	0.629366	TRUE	28.951	1.40603	0	0.379775	up	0	All genes	FALSE	FALSE
SSB	SSB	-0.00450803	1.80641	0.0938044	0.813476	0.250364	0.749636	TRUE	17.2677	1.81877	1.44599e-304	0.080261	up	1.40773e-303	All genes	FALSE	TRUE
AC007405.6	AC007405.6	-0.00250448	1.40537	0.0979079	0.567219	0.558134	0.441866	TRUE	33.9266	2.03482	0	0.221706	up	0	All genes	FALSE	FALSE
CIR1	CIR1	-0.00479597	1.50756	0.096167	0.64234	0.376081	0.623919	TRUE	25.0796	2.02596	0	0.080117	up	0	All genes	FALSE	FALSE
TTC30B	TTC30B	-0.00289919	1.28022	0.0974025	0.486775	0.629743	0.370257	TRUE	36.235	2.38839	0	0.148438	up	0	All genes	FALSE	FALSE
OSBPL6	OSBPL6	-0.00249611	1.60179	0.0963928	0.69324	0.451304	0.548696	TRUE	30.9939	1.63503	0	0.274958	up	0	All genes	FALSE	FALSE
CERKL	CERKL	-0.00182928	1.23591	0.0985283	0.423821	0.663778	0.336222	TRUE	36.8684	2.54303	0	0.166586	up	0	All genes	FALSE	FALSE
DNAJC10	DNAJC10	-0.000841413	1.43927	0.0961845	0.570169	0.415784	0.584216	TRUE	27.5778	1.93027	0	0.10038	up	0	All genes	FALSE	FALSE
MFSD6	MFSD6	-0.00155181	1.34314	0.0969706	0.519206	0.523356	0.476644	TRUE	32.6717	2.34909	0	0.0851276	up	0	All genes	FALSE	FALSE
DNAH7	DNAH7	-0.00120288	1.74432	0.0959896	0.710465	0.360105	0.639895	TRUE	28.558	1.36756	0	0.39988	up	0	All genes	FALSE	FALSE
STK17B	STK17B	-0.00021625	1.12537	0.0996004	0.322476	0.857649	0.142351	TRUE	15.5089	3.15696	6.39154e-97	0.0503984	down	2.25318e-96	All genes	FALSE	FALSE
AC013264.2	AC013264.2	-0.000925272	2.17992	0.0954485	0.867711	0.298505	0.701495	TRUE	26.5496	1.19691	0	0.517433	up	0	All genes	FALSE	FALSE
SPATS2L	SPATS2L	-0.00491828	1.54178	0.0952053	0.67708	0.359484	0.640516	TRUE	21.8918	2.60526	1.44166e-181	0.0418913	up	8.65205e-181	All genes	FALSE	FALSE
CFLAR	CFLAR	-0.00344308	1.4632	0.0954871	0.613334	0.383864	0.616136	TRUE	23.9423	2.53421	2.57595e-205	0.0473949	up	1.73029e-204	All genes	FALSE	FALSE
ALS2CR12	ALS2CR12	-0.000210864	1.26171	0.0992885	0.443637	0.652745	0.347255	TRUE	36.3608	2.50223	0	0.190693	up	0	All genes	FALSE	FALSE
KIAA2012	KIAA2012	-0.00248669	1.36807	0.0984915	0.536299	0.595084	0.404916	TRUE	34.9132	2.28664	0	0.252022	up	0	All genes	FALSE	FALSE
ICA1L	ICA1L	-0.000973134	1.24564	0.0984603	0.444005	0.664514	0.335486	TRUE	37.2997	2.57555	0	0.142605	up	0	All genes	FALSE	FALSE
ABI2	ABI2	-0.00320604	1.3336	0.0976386	0.524274	0.518402	0.481598	TRUE	32.4939	2.28944	0	0.0899532	up	0	All genes	FALSE	FALSE
MDH1B	MDH1B	-0.00210931	1.40428	0.0970033	0.545669	0.513686	0.486314	TRUE	32.7628	1.86542	0	0.259638	up	0	All genes	FALSE	FALSE
IDH1	IDH1	-0.000792157	1.21269	0.0981005	0.482923	0.757828	0.242172	TRUE	18.6276	2.06602	1.44768e-245	0.0794128	down	1.13155e-244	All genes	FALSE	FALSE
SPAG16	SPAG16	-0.00617377	2.06402	0.0932194	0.905437	0.227395	0.772605	TRUE	21.6279	1.0937	0	0.305756	up	0	All genes	FALSE	FALSE
IGFBP5	IGFBP5	-0.00218242	2.08026	0.0940684	0.956174	0.298839	0.701161	TRUE	25.423	1.18603	0	0.330832	up	0	All genes	TRUE	FALSE
CATIP	CATIP	-0.0026381	1.29257	0.0985037	0.469243	0.623106	0.376894	TRUE	35.6574	2.32133	0	0.18668	up	0	All genes	FALSE	FALSE
CFAP65	CFAP65	-0.00356341	1.53083	0.0985594	0.631646	0.443945	0.556055	TRUE	30.9585	1.62703	0	0.307536	up	0	All genes	FALSE	FALSE
TUBA4B	TUBA4B	-0.00249794	1.80779	0.0963014	0.731821	0.345136	0.654864	TRUE	28.1769	1.33328	0	0.433646	up	0	All genes	FALSE	FALSE
AC009502.4	AC009502.4	-0.0021855	1.32807	0.0979946	0.506233	0.635599	0.364401	TRUE	35.9806	2.41143	0	0.193263	up	0	All genes	FALSE	FALSE
DAW1	DAW1	-0.00428313	1.49406	0.0963222	0.614562	0.492843	0.507157	TRUE	32.3357	1.80928	0	0.283144	up	0	All genes	FALSE	FALSE
FBXO36	FBXO36	-0.000954192	1.28194	0.0976536	0.471479	0.604921	0.395079	TRUE	35.2788	2.23523	0	0.170866	up	0	All genes	FALSE	FALSE
IQCA1	IQCA1	-0.00125822	1.43796	0.0968908	0.601815	0.486887	0.513113	TRUE	31.5111	1.80329	0	0.172839	up	0	All genes	FALSE	FALSE
TRAF3IP1	TRAF3IP1	-0.00140784	1.43524	0.0960004	0.600176	0.497821	0.502179	TRUE	31.9689	1.80701	0	0.190334	up	0	All genes	FALSE	FALSE
ANKMY1	ANKMY1	-0.00107628	1.33076	0.0977418	0.512704	0.544225	0.455775	TRUE	33.4145	1.97698	0	0.177188	up	0	All genes	FALSE	FALSE
PPP1R7	PPP1R7	-0.00420502	1.46739	0.0959321	0.609815	0.397116	0.602884	TRUE	26.1021	2.1149	0	0.0759444	up	0	All genes	FALSE	FALSE
SRGAP3-AS2	SRGAP3-AS2	-0.00360245	2.11312	0.0962289	0.904866	0.347186	0.652814	TRUE	28.518	1.37408	0	0.455107	up	0	All genes	TRUE	FALSE
FGD5-AS1	FGD5-AS1	-0.00281851	1.2615	0.0979107	0.447413	0.57184	0.42816	TRUE	36.003	3.26943	5.16347e-187	0.0460341	up	3.17107e-186	All genes	FALSE	FALSE
EFHB	EFHB	-0.00356987	1.45218	0.0958871	0.610327	0.525221	0.474779	TRUE	33.1137	1.91359	0	0.243466	up	0	All genes	FALSE	FALSE
NEK10	NEK10	-0.00163551	1.46329	0.0958778	0.595669	0.480287	0.519713	TRUE	31.8375	1.73687	0	0.268769	up	0	All genes	FALSE	FALSE
AZI2	AZI2	-0.00134815	1.2607	0.0951119	0.440373	0.576943	0.423057	TRUE	36.6039	3.50573	1.29485e-165	0.0402848	up	7.18499e-165	All genes	FALSE	TRUE
CMTM7	CMTM7	-0.000241139	1.24815	0.0971915	0.534902	0.705442	0.294558	TRUE	18.5766	1.99817	5.83994e-267	0.0711289	down	4.87736e-266	All genes	FALSE	TRUE
CMTM6	CMTM6	-0.00518744	1.59911	0.094828	0.657541	0.288138	0.711862	TRUE	16.4374	2.32177	1.4447e-189	0.0464286	up	8.99412e-189	All genes	FALSE	FALSE
PDCD6IP	PDCD6IP	-0.00418314	1.43043	0.09535	0.57693	0.401697	0.598303	TRUE	25.2651	2.49038	2.1532e-222	0.0515078	up	1.52933e-221	All genes	FALSE	FALSE
DLEC1	DLEC1	-0.00312311	1.54499	0.0966563	0.640139	0.452386	0.547614	TRUE	31.1365	1.64856	0	0.294727	up	0	All genes	FALSE	FALSE
TTC21A	TTC21A	-0.00185402	1.40219	0.0963845	0.549789	0.521034	0.478966	TRUE	32.93	1.8874	0	0.249388	up	0	All genes	FALSE	FALSE
ULK4	ULK4	-0.000648685	1.34217	0.0971104	0.51097	0.564708	0.435292	TRUE	34.0523	2.05128	0	0.181775	up	0	All genes	FALSE	FALSE
TRAK1	TRAK1	-0.00289598	1.28744	0.0979287	0.483821	0.567506	0.432494	TRUE	36.2537	3.53274	3.82017e-161	0.0388051	up	2.0733e-160	All genes	FALSE	TRUE
KIF9	KIF9	-0.00502492	2.33831	0.0946147	0.955145	0.228691	0.771309	TRUE	22.4799	0.998198	0	0.442247	up	0	All genes	TRUE	FALSE
DHX30	DHX30	-0.00216318	1.26697	0.0974381	0.445247	0.561671	0.438329	TRUE	35.9733	3.69778	1.42818e-145	0.0344066	up	7.04858e-145	All genes	FALSE	TRUE
PRKAR2A	PRKAR2A	-0.00252741	1.34294	0.0965069	0.535353	0.514219	0.485781	TRUE	32.4493	2.71388	2.51573e-241	0.0586006	up	1.92222e-240	All genes	FALSE	FALSE
P4HTM	P4HTM	8.45103e-05	1.86416	0.0955829	0.779861	0.263769	0.736231	TRUE	22.9646	1.18057	0	0.266564	up	0	All genes	FALSE	FALSE
DALRD3	DALRD3	-0.00347078	1.50946	0.0960325	0.624272	0.411988	0.588012	TRUE	28.7909	1.55655	0	0.197631	up	0	All genes	FALSE	FALSE
CDHR4	CDHR4	-0.00142247	1.75675	0.0949742	0.701094	0.37084	0.62916	TRUE	29.1211	1.43027	0	0.420013	up	0	All genes	FALSE	FALSE
IFRD2	IFRD2	-0.000753777	1.08243	0.09979	0.261342	0.87939	0.12061	TRUE	15.8113	3.27495	3.78454e-90	0.0552235	down	1.26845e-89	All genes	FALSE	FALSE
TUSC2	TUSC2	-0.0029598	1.41098	0.0970199	0.558202	0.417022	0.582978	TRUE	26.9638	2.21075	5.24522e-299	0.0713904	up	4.99918e-298	All genes	FALSE	FALSE
ZMYND10	ZMYND10	-0.000736993	2.76978	0.0966116	0.9557	0.229513	0.770487	TRUE	23.1532	1.03077	0	0.714182	up	0	All genes	TRUE	FALSE
DNAH1	DNAH1	-0.000494882	1.28355	0.0987975	0.461106	0.619858	0.380142	TRUE	35.6179	2.30428	0	0.181136	up	0	All genes	FALSE	FALSE
PBRM1	PBRM1	-0.00150483	1.26338	0.099061	0.460622	0.580537	0.419463	TRUE	37.4344	3.81541	1.93319e-143	0.0345	up	9.41995e-143	All genes	FALSE	TRUE
CCDC66	CCDC66	-0.00130617	1.2829	0.0995333	0.466047	0.585775	0.414225	TRUE	35.1519	2.37099	0	0.106971	up	0	All genes	FALSE	FALSE
DNAH12	DNAH12	-0.00100862	2.77987	0.0974422	0.970296	0.232657	0.767343	TRUE	23.4413	1.06118	0	0.733514	up	0	All genes	FALSE	FALSE
FAM3D	FAM3D	-0.00250721	1.51609	0.0989003	0.862621	0.866087	0.133913	TRUE	20.9421	1.57821	0	0.290203	down	0	All genes	FALSE	FALSE
SNTN	SNTN	-0.00136094	3.52357	0.0995335	1.17087	0.217575	0.782425	TRUE	22.182	1.05198	0	0.759229	up	0	All genes	TRUE	FALSE
LRIG1	LRIG1	-0.00119766	1.3626	0.0954107	0.560148	0.494059	0.505941	TRUE	31.3537	2.88589	4.71184e-205	0.0481171	up	3.1572e-204	All genes	FALSE	TRUE
ARL6	ARL6	-0.000103419	1.21376	0.0987306	0.390852	0.673435	0.326565	TRUE	37.5136	2.61615	0	0.141275	up	0	All genes	FALSE	FALSE
TMEM45A	TMEM45A	-0.000885837	2.06657	0.0986312	1.11842	0.797844	0.202156	TRUE	22.5624	1.1562	0	0.456283	down	0	All genes	FALSE	FALSE
CEP97	CEP97	-0.00199114	1.23937	0.0988852	0.428153	0.663193	0.336807	TRUE	37.3168	2.57268	0	0.138068	up	0	All genes	FALSE	TRUE
IFT57	IFT57	-0.00282384	2.43367	0.0921396	1.02129	0.164148	0.835852	TRUE	18.4773	1.01656	0	0.349531	up	0	All genes	FALSE	FALSE
DZIP3	DZIP3	-0.0011606	1.84391	0.0953906	0.787327	0.335576	0.664424	TRUE	27.579	1.28011	0	0.399163	up	0	All genes	FALSE	FALSE
CFAP44	CFAP44	-0.00132179	1.5782	0.0968512	0.68643	0.459446	0.540554	TRUE	31.0404	1.65413	0	0.246352	up	0	All genes	FALSE	FALSE
CCDC191	CCDC191	-0.00182555	1.4701	0.0973542	0.60254	0.464337	0.535663	TRUE	31.0697	1.66728	0	0.233791	up	0	All genes	FALSE	FALSE
MAATS1	MAATS1	-0.000554294	1.54015	0.0969908	0.627196	0.439783	0.560217	TRUE	30.9496	1.62816	0	0.326319	up	0	All genes	FALSE	FALSE
CFAP100	CFAP100	-0.00308324	1.50817	0.0963021	0.629986	0.456981	0.543019	TRUE	31.3129	1.67046	0	0.295422	up	0	All genes	FALSE	FALSE
CHCHD6	CHCHD6	8.34466e-05	1.27498	0.0991087	0.454943	0.574116	0.425884	TRUE	34.6881	2.33968	0	0.105039	up	0	All genes	FALSE	FALSE
RUVBL1	RUVBL1	-0.00268031	1.66839	0.0950876	0.69849	0.362686	0.637314	TRUE	27.2151	1.38091	0	0.243528	up	0	All genes	FALSE	FALSE
EFCAB12	EFCAB12	-0.00220233	1.29814	0.09854	0.468725	0.593741	0.406259	TRUE	34.8264	2.18745	0	0.209084	up	0	All genes	FALSE	FALSE
NEK11	NEK11	-0.00341086	1.48034	0.097496	0.598247	0.445676	0.554324	TRUE	30.5025	1.5986	0	0.251278	up	0	All genes	FALSE	FALSE
DZIP1L	DZIP1L	-0.00440688	1.36344	0.0985134	0.540913	0.548631	0.451369	TRUE	33.7042	2.00472	0	0.233641	up	0	All genes	FALSE	FALSE
NME9	NME9	-0.00210386	1.34045	0.0976575	0.504507	0.572434	0.427566	TRUE	34.292	2.11216	0	0.232348	up	0	All genes	FALSE	FALSE
FAIM	FAIM	0.000178493	1.45661	0.0978033	0.623154	0.46249	0.53751	TRUE	30.1641	1.952	0	0.115153	up	0	All genes	FALSE	FALSE
TM4SF1	TM4SF1	-0.00205265	1.62172	0.0950328	1.05212	0.674959	0.325041	TRUE	21.6589	1.5375	0	0.131144	down	0	All genes	FALSE	FALSE
ANKUB1	ANKUB1	-0.00353436	1.66608	0.0951712	0.713193	0.411494	0.588506	TRUE	29.6082	1.49207	0	0.28806	up	0	All genes	FALSE	FALSE
PFN2	PFN2	-0.00323422	1.82774	0.0948896	0.776314	0.267205	0.732795	TRUE	21.8111	1.34438	0	0.180791	up	0	All genes	FALSE	FALSE
ERICH6-AS1	ERICH6-AS1	-0.00259475	1.31703	0.0974003	0.490143	0.611418	0.388582	TRUE	35.352	2.26236	0	0.188287	up	0	All genes	FALSE	FALSE
LEKR1	LEKR1	-0.000734785	1.25615	0.0977629	0.441088	0.633338	0.366662	TRUE	36.109	2.37576	0	0.163911	up	0	All genes	FALSE	FALSE
MLF1	MLF1	-0.0039475	2.03704	0.0946887	0.840714	0.28645	0.71355	TRUE	24.9958	1.13011	0	0.376319	up	0	All genes	FALSE	FALSE
LXN	LXN	-0.00214591	1.60137	0.0948333	0.752328	0.407421	0.592579	TRUE	28.0918	1.75134	0	0.131713	up	0	All genes	FALSE	FALSE
IFT80	IFT80	-0.0019431	1.25692	0.0992265	0.440758	0.608969	0.391031	TRUE	35.781	2.36437	0	0.12344	up	0	All genes	FALSE	FALSE
ZBBX	ZBBX	-0.00406845	1.72438	0.0964222	0.697221	0.361727	0.638273	TRUE	28.6705	1.37933	0	0.407034	up	0	All genes	FALSE	FALSE
WDR49	WDR49	-0.00220483	1.40707	0.0962099	0.563143	0.499545	0.500455	TRUE	32.1255	1.78891	0	0.219024	up	0	All genes	FALSE	FALSE
LRRC34	LRRC34	-0.00229495	1.49384	0.0979327	0.603232	0.485549	0.514451	TRUE	32.1697	1.78775	0	0.292172	up	0	All genes	FALSE	FALSE
TMEM212	TMEM212	-0.00283416	1.38279	0.0980527	0.539744	0.563704	0.436296	TRUE	34.1447	2.11137	0	0.255066	up	0	All genes	FALSE	FALSE
TNFSF10	TNFSF10	-0.00147426	1.51223	0.0961945	0.848501	0.655335	0.344665	TRUE	23.8172	1.41604	0	0.174275	down	0	All genes	FALSE	FALSE
NDUFB5	NDUFB5	-0.00339509	1.57525	0.0957203	0.653924	0.323113	0.676887	TRUE	18.4837	2.52462	1.13947e-172	0.040741	up	6.6102e-172	All genes	FALSE	TRUE
CCDC39	CCDC39	-0.0014126	1.68094	0.0954008	0.707119	0.399083	0.600917	TRUE	29.8234	1.4979	0	0.361581	up	0	All genes	FALSE	FALSE
B3GNT5	B3GNT5	-0.000989676	1.3709	0.0965168	0.559636	0.52658	0.47342	TRUE	32.8456	2.06024	0	0.128179	up	0	All genes	FALSE	FALSE
KLHL6	KLHL6	-0.000763197	1.25719	0.0982037	0.463482	0.726821	0.273179	TRUE	37.5063	3.06293	4.85863e-240	0.177671	up	3.69165e-239	All genes	FALSE	TRUE
ST6GAL1	ST6GAL1	-0.00211195	1.28637	0.0973363	0.63658	0.720696	0.279304	TRUE	15.8871	2.44189	2.54478e-167	0.0467543	down	1.42271e-166	All genes	FALSE	FALSE
PPP1R2	PPP1R2	-0.00233639	1.30545	0.0972384	0.498122	0.50645	0.49355	TRUE	32.1276	3.47282	3.16741e-145	0.0331389	up	1.55946e-144	All genes	FALSE	TRUE
TCTEX1D2	TCTEX1D2	-0.00415118	1.96333	0.0942237	0.866003	0.302061	0.697939	TRUE	25.5312	1.18812	0	0.334073	up	0	All genes	FALSE	FALSE
IQCG	IQCG	-0.00198185	1.84982	0.0966639	0.792078	0.329093	0.670907	TRUE	27.4142	1.26457	0	0.412946	up	0	All genes	FALSE	FALSE
C4orf48	C4orf48	-0.00538146	1.85896	0.0943946	0.787174	0.261236	0.738764	TRUE	19.9566	1.53384	0	0.125119	up	0	All genes	TRUE	FALSE
WFS1	WFS1	-0.00160144	1.26842	0.0979199	0.459883	0.652996	0.347004	TRUE	37.503	2.61419	0	0.114936	up	0	All genes	FALSE	TRUE
S100P	S100P	-0.000269971	1.75437	0.0959613	1.17007	0.678192	0.321808	TRUE	19.6655	1.81046	0	0.0857307	down	0	All genes	FALSE	FALSE
KIAA0232	KIAA0232	-0.00142347	1.25107	0.0970978	0.444587	0.616938	0.383062	TRUE	37.2675	2.8518	1.2815e-259	0.0736283	up	1.0436e-258	All genes	FALSE	FALSE
CCDC96	CCDC96	-0.00143093	1.35958	0.0980584	0.552475	0.619933	0.380067	TRUE	35.596	2.34395	0	0.202848	up	0	All genes	FALSE	FALSE
CC2D2A	CC2D2A	-0.00415654	1.6678	0.0956706	0.715783	0.393326	0.606674	TRUE	29.2154	1.4434	0	0.315525	up	0	All genes	FALSE	FALSE
LAP3	LAP3	-0.00239629	1.28679	0.0966054	0.482444	0.565632	0.434368	TRUE	35.7562	3.29685	2.60988e-182	0.0444727	up	1.56862e-181	All genes	FALSE	TRUE
ANAPC4	ANAPC4	-0.00327493	1.33168	0.0979983	0.524031	0.581275	0.418725	TRUE	34.9227	2.27652	0	0.12171	up	0	All genes	FALSE	FALSE
DTHD1	DTHD1	-0.00342974	1.80134	0.0953038	0.75254	0.359892	0.640108	TRUE	28.7241	1.38572	0	0.413535	up	0	All genes	FALSE	FALSE
WDR19	WDR19	-0.00171732	1.33208	0.0972968	0.503863	0.561654	0.438346	TRUE	33.9435	2.03079	0	0.19566	up	0	All genes	FALSE	FALSE
UGDH	UGDH	-0.00436785	1.34608	0.0971164	0.536741	0.527388	0.472612	TRUE	32.9586	2.4192	0	0.0804698	up	0	All genes	FALSE	FALSE
SMIM14	SMIM14	-0.0026046	1.66182	0.0944983	0.703666	0.262725	0.737275	TRUE	14.6103	2.25663	6.40286e-189	0.0476715	up	3.97104e-188	All genes	FALSE	TRUE
NSUN7	NSUN7	-0.00348564	1.39224	0.0961643	0.542821	0.493512	0.506488	TRUE	31.6291	1.81143	0	0.173432	up	0	All genes	FALSE	FALSE
SLAIN2	SLAIN2	-0.00391307	1.63991	0.0955257	0.757098	0.404327	0.595673	TRUE	28.4022	1.59815	0	0.174034	up	0	All genes	FALSE	FALSE
SPATA18	SPATA18	-0.00247261	1.98233	0.09416	0.83603	0.288852	0.711148	TRUE	25.6104	1.1343	0	0.431164	up	0	All genes	TRUE	FALSE
CHIC2	CHIC2	-0.000139185	1.23827	0.0988953	0.420029	0.58606	0.41394	TRUE	36.5379	3.18106	1.74939e-201	0.0509546	up	1.15234e-200	All genes	FALSE	FALSE
HOPX	HOPX	-0.000792047	1.40939	0.0963073	0.845002	0.757669	0.242331	TRUE	20.4063	1.78221	0	0.120623	down	0	All genes	TRUE	FALSE
IGFBP7	IGFBP7	-0.00140488	3.18268	0.0962554	1.14937	0.168728	0.831272	TRUE	19.1543	0.964758	0	0.480729	up	0	All genes	TRUE	FALSE
SLC4A4	SLC4A4	-0.000994314	1.3509	0.0989946	0.6221	0.858699	0.141301	TRUE	21.4193	1.47927	0	0.323971	down	0	All genes	FALSE	TRUE
CXCL6	CXCL6	-0.000556038	1.70339	0.0991311	1.03472	0.88459	0.11541	TRUE	20.8468	1.51037	0	0.419494	down	0	All genes	FALSE	TRUE
CXCL1	CXCL1	0.000338787	2.49874	0.0989999	1.47441	0.841512	0.158488	TRUE	21.7574	1.27197	0	0.454585	down	0	All genes	FALSE	FALSE
G3BP2	G3BP2	-0.00230956	1.26585	0.0984757	0.450698	0.561813	0.438187	TRUE	36.1877	3.82621	7.2074e-137	0.0321704	up	3.37557e-136	All genes	FALSE	TRUE
FAM47E	FAM47E	-0.000166144	1.24091	0.0987939	0.436279	0.673189	0.326811	TRUE	37.3645	2.612	0	0.152007	up	0	All genes	FALSE	FALSE
SHROOM3	SHROOM3	-0.00315368	1.49538	0.0948067	0.628004	0.412852	0.587148	TRUE	28.0716	1.75445	0	0.130925	up	0	All genes	FALSE	FALSE
C4orf22	C4orf22	-0.00216421	1.48179	0.096267	0.602419	0.470707	0.529293	TRUE	31.6698	1.71581	0	0.285804	up	0	All genes	FALSE	FALSE
PLAC8	PLAC8	-0.00421121	2.0182	0.0924806	0.898473	0.232932	0.767068	TRUE	19.785	1.345	0	0.168888	up	0	All genes	FALSE	FALSE
MRPS18C	MRPS18C	-0.00060838	1.3505	0.0960936	0.519963	0.477936	0.522064	TRUE	29.8429	3.42517	2.63998e-138	0.0311022	up	1.2515e-137	All genes	FALSE	TRUE
CDS1	CDS1	-0.00461111	1.9677	0.0945692	0.827696	0.280651	0.719349	TRUE	24.6873	1.12546	0	0.364	up	0	All genes	FALSE	FALSE
MAPK10	MAPK10	0.000774728	1.30679	0.0974866	0.494128	0.560719	0.439281	TRUE	33.9828	2.10467	0	0.143991	up	0	All genes	FALSE	FALSE
FAM13A	FAM13A	-0.00119651	1.36517	0.0965452	0.526979	0.464011	0.535989	TRUE	29.4502	2.47814	1.79453e-260	0.0619074	up	1.46724e-259	All genes	FALSE	FALSE
ADH1C	ADH1C	-0.00054286	1.25449	0.0981745	0.607718	0.861743	0.138257	TRUE	17.6734	2.70993	1.76799e-135	0.0787432	down	8.21441e-135	All genes	FALSE	FALSE
PAPSS1	PAPSS1	-0.00204363	1.4008	0.0957196	0.555355	0.420066	0.579934	TRUE	26.1478	2.73288	6.27193e-191	0.0436396	up	3.9226e-190	All genes	FALSE	TRUE
SGMS2	SGMS2	-0.00247838	1.27448	0.0961884	0.490355	0.567853	0.432147	TRUE	35.7945	3.16498	2.15652e-198	0.0492154	up	1.39465e-197	All genes	FALSE	FALSE
CFI	CFI	-0.00167039	1.20081	0.0989825	0.440669	0.870596	0.129404	TRUE	20.4325	1.83528	1.37915e-290	0.197335	down	1.27431e-289	All genes	FALSE	TRUE
SNHG8	SNHG8	-0.00281733	1.47417	0.0942536	0.714466	0.430494	0.569506	TRUE	34.504	3.74894	7.18371e-135	0.0311159	down	3.33011e-134	All genes	FALSE	TRUE
PRSS12	PRSS12	-0.00348334	1.35718	0.0979479	0.529473	0.505494	0.494506	TRUE	31.9273	1.98695	0	0.129011	up	0	All genes	FALSE	FALSE
INTU	INTU	-0.000764936	1.22913	0.097438	0.417338	0.647934	0.352066	TRUE	37.4122	2.61585	0	0.109483	up	0	All genes	FALSE	FALSE
TTC29	TTC29	-0.00233736	1.6252	0.0965955	0.691456	0.424915	0.575085	TRUE	30.8085	1.61929	0	0.361378	up	0	All genes	FALSE	FALSE
LRBA	LRBA	-0.00324117	1.32489	0.0973514	0.502802	0.502218	0.497782	TRUE	31.6354	2.47329	4.38907e-283	0.0697955	up	3.95694e-282	All genes	FALSE	FALSE
TMEM154	TMEM154	-0.00314429	1.32212	0.0977127	0.503484	0.574298	0.425702	TRUE	34.6214	2.25897	0	0.118869	up	0	All genes	FALSE	FALSE
TRIM2	TRIM2	-0.00454257	1.40209	0.0969418	0.579991	0.442765	0.557235	TRUE	27.3963	3.22697	1.93404e-143	0.0321648	up	9.41995e-143	All genes	FALSE	TRUE
MAP9	MAP9	-0.00319312	1.65264	0.0951988	0.717576	0.372692	0.627308	TRUE	27.613	1.41973	0	0.23293	up	0	All genes	FALSE	FALSE
LINC01207	LINC01207	-0.00153507	1.15584	0.0995519	0.39161	0.882922	0.117078	TRUE	17.5057	2.80236	6.52778e-124	0.0820218	down	2.79743e-123	All genes	FALSE	FALSE
NEK1	NEK1	-0.00368729	1.40011	0.0970155	0.567459	0.512763	0.487237	TRUE	32.3512	1.89771	0	0.163354	up	0	All genes	FALSE	FALSE
CLCN3	CLCN3	-0.002209	1.26369	0.0990968	0.444958	0.587472	0.412528	TRUE	36.4751	3.07398	1.04886e-215	0.0554224	up	7.30358e-215	All genes	FALSE	TRUE
HMGB2	HMGB2	-0.00435386	1.48225	0.096313	0.623066	0.444764	0.555236	TRUE	29.5761	1.79719	0	0.137805	up	0	All genes	FALSE	FALSE
SPATA4	SPATA4	-0.00192205	1.33692	0.0967803	0.495599	0.583072	0.416928	TRUE	34.5599	2.18113	0	0.240823	up	0	All genes	FALSE	FALSE
SLC25A4	SLC25A4	-0.00149492	1.49599	0.095071	0.634008	0.410187	0.589813	TRUE	27.164	2.04669	0	0.0857544	up	0	All genes	FALSE	FALSE
ANKRD37	ANKRD37	-0.00308116	1.64229	0.0945534	0.727882	0.371495	0.628505	TRUE	26.55	1.60762	0	0.148212	up	0	All genes	FALSE	FALSE
C4orf47	C4orf47	-0.00382667	1.7531	0.0953624	0.71925	0.351176	0.648824	TRUE	28.1062	1.32572	0	0.392754	up	0	All genes	FALSE	FALSE
SORBS2	SORBS2	-0.00279811	1.32639	0.0982594	0.516465	0.521932	0.478068	TRUE	32.9225	2.83953	7.66029e-224	0.0540717	up	5.46456e-223	All genes	FALSE	FALSE
PDCD6	PDCD6	-0.00368114	1.61825	0.0958714	0.682035	0.27613	0.72387	TRUE	14.6194	2.41955	2.771e-166	0.0410213	up	1.54074e-165	All genes	FALSE	TRUE
TRIP13	TRIP13	-0.001941	1.56756	0.0974269	0.65563	0.525083	0.474917	TRUE	33.0665	1.90646	0	0.24391	up	0	All genes	FALSE	FALSE
C5orf49	C5orf49	0.000323277	2.99933	0.0986357	1.02823	0.223939	0.776061	TRUE	22.6791	0.99066	0	0.674067	up	0	All genes	TRUE	FALSE
SNHG18	SNHG18	0.000182123	1.16098	0.100088	0.380393	0.80277	0.19723	TRUE	15.8843	2.67339	1.00375e-136	0.051978	down	4.69835e-136	All genes	FALSE	FALSE
CCT5	CCT5	-7.84946e-05	1.38046	0.0961361	0.547841	0.442576	0.557424	TRUE	27.3719	3.06874	2.70326e-158	0.0357208	up	1.43658e-157	All genes	FALSE	FALSE
2023-03-06	2023-03-06	-0.00173095	1.36758	0.0977888	0.531987	0.460938	0.539062	TRUE	29.4065	2.37237	6.49716e-284	0.0682178	up	5.87044e-283	All genes	FALSE	FALSE
ROPN1L	ROPN1L	-0.0033861	2.4806	0.0963424	0.978915	0.271817	0.728183	TRUE	25.618	1.14143	0	0.597709	up	0	All genes	TRUE	FALSE
DNAH5	DNAH5	-0.00257561	2.30562	0.0937331	0.981292	0.244994	0.755006	TRUE	23.4437	1.02925	0	0.439624	up	0	All genes	FALSE	FALSE
BASP1	BASP1	-0.00262391	1.61368	0.0950793	0.782998	0.500396	0.499604	TRUE	32.3578	1.82271	0	0.209332	up	0	All genes	FALSE	FALSE
RAI14	RAI14	-0.00128129	1.20588	0.099051	0.45424	0.774326	0.225674	TRUE	19.443	1.95489	2.56422e-277	0.0975008	down	2.24006e-276	All genes	FALSE	FALSE
SPEF2	SPEF2	-0.000826082	1.88232	0.0971088	0.768204	0.327975	0.672025	TRUE	27.5449	1.275	0	0.447695	up	0	All genes	FALSE	FALSE
CAPSL	CAPSL	-0.00460826	2.63099	0.0954863	0.998781	0.258207	0.741793	TRUE	24.9214	1.10047	0	0.635946	up	0	All genes	FALSE	FALSE
C5orf42	C5orf42	-0.0028589	1.3296	0.09729	0.503995	0.523097	0.476903	TRUE	32.6519	2.36965	0	0.0830652	up	0	All genes	FALSE	FALSE
C6	C6	-0.00285314	1.66119	0.0972188	0.69167	0.435377	0.564623	TRUE	30.7618	1.60419	0	0.323512	up	0	All genes	FALSE	FALSE
PLK2	PLK2	-0.000614678	1.41493	0.0971621	0.759865	0.825522	0.174478	TRUE	21.716	1.50508	0	0.253865	down	0	All genes	FALSE	FALSE
KIF2A	KIF2A	-0.0017993	1.36186	0.096617	0.541742	0.482085	0.517915	TRUE	30.5895	2.58894	1.88979e-248	0.0592643	up	1.48422e-247	All genes	FALSE	FALSE
CCDC125	CCDC125	-0.000237014	1.26505	0.0984214	0.448089	0.625099	0.374901	TRUE	36.9607	2.63694	1.86099e-303	0.0939223	up	1.80315e-302	All genes	FALSE	FALSE
MAP1B	MAP1B	-0.00154893	1.45875	0.0968264	0.617421	0.536813	0.463187	TRUE	33.4049	1.95374	0	0.228845	up	0	All genes	FALSE	FALSE
CTD-2015H6.3	CTD-2015H6.3	-0.00103128	1.27248	0.0983273	0.472208	0.599816	0.400184	TRUE	36.2853	2.67429	1.91868e-286	0.0812956	up	1.74909e-285	All genes	FALSE	FALSE
MSH3	MSH3	-0.0013921	1.4009	0.098413	0.578879	0.542676	0.457324	TRUE	33.4963	2.14583	0	0.121356	up	0	All genes	FALSE	FALSE
FAM81B	FAM81B	-0.00158465	2.01452	0.0948569	0.873721	0.341176	0.658824	TRUE	28.0304	1.31817	0	0.424462	up	0	All genes	FALSE	FALSE
PAM	PAM	-0.00149584	1.30026	0.0982844	0.62437	0.790456	0.209544	TRUE	21.3035	1.57927	0	0.182077	down	0	All genes	FALSE	FALSE
TMEM232	TMEM232	-0.00244515	1.56495	0.0962963	0.647137	0.453619	0.546381	TRUE	31.2475	1.66302	0	0.305085	up	0	All genes	FALSE	FALSE
CTD-2544H17.1	CTD-2544H17.1	0.000133204	1.34834	0.0982093	0.535039	0.615144	0.384856	TRUE	35.3832	2.3583	0	0.228651	up	0	All genes	FALSE	FALSE
PDLIM4	PDLIM4	-0.00326348	1.79331	0.0938452	0.781264	0.284194	0.715806	TRUE	20.8622	1.64414	0	0.109798	up	0	All genes	TRUE	FALSE
KIF3A	KIF3A	-0.00245936	1.43879	0.0962455	0.587337	0.482909	0.517091	TRUE	31.4509	1.75046	0	0.19605	up	0	All genes	FALSE	FALSE
C5orf15	C5orf15	-0.00119993	1.45997	0.094271	0.581497	0.409462	0.590538	TRUE	27.3048	1.89594	0	0.103237	up	0	All genes	FALSE	FALSE
NME5	NME5	-0.00328306	1.94852	0.0966237	0.812291	0.326038	0.673962	TRUE	27.0517	1.23955	0	0.398686	up	0	All genes	FALSE	FALSE
PAIP2	PAIP2	-0.00226394	1.56723	0.0961711	0.64782	0.337439	0.662561	TRUE	22.1821	2.05223	1.7269e-290	0.0702367	up	1.59382e-289	All genes	FALSE	FALSE
TMEM173	TMEM173	-0.00195476	1.55254	0.0958376	0.658983	0.35493	0.64507	TRUE	25.1605	1.67406	0	0.124311	up	0	All genes	FALSE	FALSE
CYSTM1	CYSTM1	-0.00561589	2.77196	0.0945192	1.13848	0.1252	0.8748	TRUE	15.5483	1.08217	0	0.300309	up	0	All genes	FALSE	FALSE
EIF4EBP3	EIF4EBP3	-0.00172004	1.33216	0.0975389	0.529454	0.575019	0.424981	TRUE	37.1596	3.76101	2.5088e-146	0.035165	up	1.24798e-145	All genes	FALSE	TRUE
IK	IK	-0.00705018	2.39934	0.0938901	1.03378	0.16305	0.83695	TRUE	18.3612	1.02666	0	0.33707	up	0	All genes	FALSE	FALSE
ZMAT2	ZMAT2	-0.00400693	1.34465	0.0977322	0.522133	0.482656	0.517344	TRUE	30.3865	3.14212	2.98823e-167	0.038235	up	1.66948e-166	All genes	FALSE	TRUE
CCDC69	CCDC69	-0.00376584	1.28885	0.097037	0.474582	0.58767	0.41233	TRUE	35.4176	2.47255	0	0.0952873	up	0	All genes	FALSE	FALSE
FABP6	FABP6	-0.00197769	1.64527	0.095214	0.795027	0.513083	0.486917	TRUE	32.7265	1.869	0	0.20415	up	0	All genes	FALSE	FALSE
CCNG1	CCNG1	0.000714863	1.12568	0.100401	0.304566	0.865738	0.134262	TRUE	14.8468	3.29959	7.93429e-87	0.0476385	down	2.57888e-86	All genes	FALSE	FALSE
PRR7	PRR7	-0.000376118	1.28721	0.0984944	0.460285	0.619946	0.380054	TRUE	35.8249	2.32257	0	0.151732	up	0	All genes	FALSE	FALSE
C5orf45	C5orf45	-0.00277419	1.28279	0.0984831	0.465493	0.586708	0.413292	TRUE	34.858	2.20857	0	0.14068	up	0	All genes	FALSE	FALSE
SCGB3A1	SCGB3A1	1.38421	8.74373	1.08973	2.72692	0.799003	0.200997	TRUE	19.8532	0.9869	0	0.394848	down	0	All genes	TRUE	FALSE
SERPINB6	SERPINB6	-0.00491316	1.67276	0.095714	0.714883	0.270315	0.729685	TRUE	18.9856	1.77575	0	0.0879286	up	0	All genes	FALSE	FALSE
ECI2	ECI2	-0.00244165	1.36678	0.0971865	0.58156	0.569568	0.430432	TRUE	35.6259	2.89253	2.9164e-237	0.0611681	up	2.19347e-236	All genes	FALSE	FALSE
DSP	DSP	-0.00625243	1.54753	0.0938763	0.675183	0.351274	0.648726	TRUE	20.2841	2.78263	9.2766e-152	0.0348422	up	4.77751e-151	All genes	FALSE	FALSE
TMEM14B	TMEM14B	-0.00454746	1.83834	0.09249	0.791303	0.212865	0.787135	TRUE	14.9288	1.71339	0	0.0882233	up	0	All genes	FALSE	TRUE
STMND1	STMND1	-0.00252114	1.51666	0.0963261	0.647842	0.476395	0.523605	TRUE	31.8212	1.73504	0	0.277496	up	0	All genes	FALSE	FALSE
RP4-625H18.2	RP4-625H18.2	-0.000908735	1.27644	0.0993869	0.458857	0.638331	0.361669	TRUE	36.1473	2.40298	0	0.175525	up	0	All genes	FALSE	FALSE
FAM65B	FAM65B	-0.00382082	1.54202	0.0955145	0.644912	0.459672	0.540328	TRUE	31.2747	1.66583	0	0.283808	up	0	All genes	FALSE	FALSE
HIST1H1C	HIST1H1C	-0.00194093	1.6875	0.0949414	0.850493	0.419484	0.580516	TRUE	27.7046	2.29951	4.69378e-284	0.0675572	up	4.24572e-283	All genes	FALSE	FALSE
PPP1R10	PPP1R10	-0.000665037	1.29402	0.0975788	0.495693	0.563832	0.436168	TRUE	36.1761	3.60074	1.21493e-154	0.0369618	up	6.34906e-154	All genes	FALSE	TRUE
IER3	IER3	-0.00054276	1.37054	0.0980204	0.800193	0.821984	0.178016	TRUE	19.4074	2.05803	7.49604e-241	0.115461	down	5.71687e-240	All genes	FALSE	FALSE
SFTA2	SFTA2	-0.0026604	1.29304	0.098171	0.778904	0.852884	0.147116	TRUE	15.4323	3.21854	1.88818e-92	0.0507212	down	6.42344e-92	All genes	TRUE	TRUE
BAG6	BAG6	-0.00441621	1.29581	0.0981725	0.473753	0.507099	0.492901	TRUE	31.9724	3.13949	7.81813e-177	0.0410522	up	4.61405e-176	All genes	FALSE	TRUE
SLC44A4	SLC44A4	-0.00262652	2.35647	0.0939354	0.964595	0.136879	0.863121	TRUE	15.2284	1.15661	0	0.236497	up	0	All genes	TRUE	FALSE
NELFE	NELFE	-0.00333386	1.55082	0.093994	0.648992	0.364766	0.635234	TRUE	25.7175	1.67098	0	0.128407	up	0	All genes	FALSE	FALSE
PSMB9	PSMB9	-0.000286235	1.2868	0.0968426	0.515458	0.568689	0.431311	TRUE	36.9376	3.81211	2.38424e-141	0.0336835	up	1.14826e-140	All genes	FALSE	TRUE
PFDN6	PFDN6	-0.00386543	1.34639	0.0987324	0.524875	0.476339	0.523661	TRUE	30.1164	2.80973	2.98024e-207	0.0482395	up	2.01179e-206	All genes	FALSE	FALSE
NUDT3	NUDT3	0.000431132	1.25109	0.0982573	0.453332	0.597418	0.402582	TRUE	37.5478	3.35119	1.6757e-187	0.0477102	up	1.03299e-186	All genes	FALSE	TRUE
C6orf132	C6orf132	-0.00208604	1.25254	0.0981806	0.459678	0.604183	0.395817	TRUE	37.4557	3.14219	2.02523e-213	0.0562084	up	1.39832e-212	All genes	FALSE	FALSE
DNPH1	DNPH1	-0.00521652	2.1503	0.0933574	0.876733	0.179426	0.820574	TRUE	17.9595	1.14385	0	0.242928	up	0	All genes	FALSE	FALSE
LRRC73	LRRC73	-0.0017564	1.24709	0.0988978	0.434048	0.67865	0.32135	TRUE	37.1734	2.65075	0	0.172446	up	0	All genes	FALSE	FALSE
RSPH9	RSPH9	-0.00234746	2.17705	0.0960728	0.869577	0.298362	0.701638	TRUE	26.7343	1.21966	0	0.536587	up	0	All genes	FALSE	FALSE
ENPP5	ENPP5	-0.0017129	1.37746	0.0971477	0.540683	0.529362	0.470638	TRUE	32.872	1.99397	0	0.145839	up	0	All genes	FALSE	FALSE
ANKRD66	ANKRD66	-0.00264842	1.82157	0.095274	0.767037	0.363416	0.636584	TRUE	28.8717	1.4017	0	0.415508	up	0	All genes	FALSE	FALSE
EFHC1	EFHC1	-0.00271475	2.42209	0.0939343	0.896687	0.229003	0.770997	TRUE	22.85	0.975336	0	0.560512	up	0	All genes	FALSE	FALSE
GSTA4	GSTA4	-0.000517816	1.14142	0.0994268	0.443975	0.887193	0.112807	TRUE	18.6943	2.61414	4.14396e-146	0.103996	down	2.05762e-145	All genes	TRUE	TRUE
GCLC	GCLC	-0.002343	1.36861	0.0965928	0.580923	0.590477	0.409523	TRUE	35.683	2.47231	0	0.098867	up	0	All genes	FALSE	FALSE
COL21A1	COL21A1	-0.00243335	1.22587	0.0978797	0.412679	0.669039	0.330961	TRUE	37.5413	2.61061	0	0.134228	up	0	All genes	FALSE	FALSE
FILIP1	FILIP1	-0.00146116	1.34536	0.0984525	0.52931	0.625453	0.374547	TRUE	35.8799	2.34426	0	0.17333	up	0	All genes	FALSE	FALSE
PHIP	PHIP	-0.00471212	1.58309	0.0941656	0.673228	0.324091	0.675909	TRUE	21.3127	2.05079	6.34191e-282	0.0684773	up	5.68614e-281	All genes	FALSE	FALSE
LCA5	LCA5	-0.00389855	1.40202	0.0966363	0.559017	0.497232	0.502768	TRUE	31.7208	1.86491	0	0.156568	up	0	All genes	FALSE	FALSE
CFAP206	CFAP206	-0.000334964	1.28489	0.0964496	0.473473	0.64345	0.35655	TRUE	36.1623	2.45819	0	0.193311	up	0	All genes	FALSE	FALSE
LYRM2	LYRM2	-0.00186379	1.32012	0.0979739	0.497864	0.523804	0.476196	TRUE	33.1215	3.12144	4.41802e-186	0.0439188	up	2.70716e-185	All genes	FALSE	FALSE
CD24	CD24	-0.00469919	3.00278	0.0944054	1.26635	0.140991	0.859009	TRUE	15.6971	1.13221	0	0.250824	up	0	All genes	TRUE	FALSE
ARMC2	ARMC2	-0.00239315	1.33648	0.0989345	0.492972	0.552159	0.447841	TRUE	33.6652	1.99075	0	0.217649	up	0	All genes	FALSE	FALSE
SESN1	SESN1	-0.00201675	1.30092	0.098	0.486306	0.571619	0.428381	TRUE	35.308	2.77698	3.53281e-255	0.0665771	up	2.82902e-254	All genes	FALSE	FALSE
PPIL6	PPIL6	-0.00291659	1.99541	0.0943884	0.832872	0.303734	0.696266	TRUE	26.5817	1.19411	0	0.468164	up	0	All genes	FALSE	FALSE
SMPD2	SMPD2	-0.000955814	1.35973	0.0976505	0.52477	0.51947	0.48053	TRUE	32.568	1.88745	0	0.17713	up	0	All genes	FALSE	FALSE
AK9	AK9	-0.00291341	1.47567	0.0968632	0.615432	0.462547	0.537453	TRUE	31.0465	1.66199	0	0.237182	up	0	All genes	FALSE	FALSE
FAM229B	FAM229B	-0.00195385	2.44472	0.0980298	0.986208	0.237838	0.762162	TRUE	23.2681	0.999484	0	0.501524	up	0	All genes	TRUE	FALSE
NT5DC1	NT5DC1	-0.00200627	1.2999	0.0972391	0.483622	0.541197	0.458803	TRUE	34.0474	3.01826	1.13072e-205	0.0498286	up	7.6077e-205	All genes	FALSE	FALSE
RSPH4A	RSPH4A	-0.00187179	1.83242	0.0946414	0.769115	0.363979	0.636021	TRUE	29.0819	1.43077	0	0.435638	up	0	All genes	FALSE	FALSE
ARHGAP18	ARHGAP18	-0.00430036	2.10981	0.0955501	0.916565	0.281081	0.718919	TRUE	24.9497	1.12027	0	0.388102	up	0	All genes	FALSE	FALSE
CTGF	CTGF	2.95817e-05	2.22679	0.0946789	1.17724	0.422324	0.577676	TRUE	29.28	1.62509	0	0.181722	up	0	All genes	FALSE	FALSE
STX7	STX7	-0.00278651	1.24569	0.0977123	0.432352	0.588736	0.411264	TRUE	36.3555	2.98097	7.40679e-229	0.0596011	up	5.38244e-228	All genes	FALSE	FALSE
VNN3	VNN3	-0.00276474	1.38983	0.0970751	0.647051	0.647935	0.352065	TRUE	36.8995	2.51424	0	0.153187	up	0	All genes	FALSE	FALSE
SGK1	SGK1	-0.00138733	1.24548	0.0981303	0.559987	0.840082	0.159918	TRUE	18.0136	2.42312	1.30516e-169	0.0848781	down	7.40313e-169	All genes	FALSE	FALSE
BCLAF1	BCLAF1	-0.00536503	1.49609	0.0958098	0.625022	0.34702	0.65298	TRUE	19.5582	2.8165	6.44531e-145	0.033308	up	3.16188e-144	All genes	FALSE	TRUE
IL20RA	IL20RA	-0.00278235	1.30671	0.0967778	0.492346	0.52137	0.47863	TRUE	32.702	2.57718	1.30538e-270	0.0673583	up	1.10836e-269	All genes	FALSE	FALSE
ARFGEF3	ARFGEF3	-0.00318851	1.44474	0.0959656	0.602557	0.417735	0.582265	TRUE	25.3042	3.12517	1.55264e-142	0.0319597	up	7.52192e-142	All genes	FALSE	TRUE
CCDC28A	CCDC28A	-0.00279501	1.42224	0.0969164	0.579682	0.463431	0.536569	TRUE	29.7418	2.27801	0	0.0762697	up	0	All genes	FALSE	FALSE
ECT2L	ECT2L	-0.00298046	1.54912	0.0964574	0.642302	0.471333	0.528667	TRUE	31.9163	1.75918	0	0.315732	up	0	All genes	FALSE	FALSE
ABRACL	ABRACL	-0.00268466	1.22699	0.0978722	0.487963	0.71154	0.28846	TRUE	16.4487	2.32196	3.9305e-188	0.0496959	down	2.42663e-187	All genes	FALSE	FALSE
UTRN	UTRN	-0.0029122	1.2946	0.0970391	0.473919	0.538842	0.461158	TRUE	34.5919	3.80745	3.93853e-131	0.03019	up	1.7744e-130	All genes	FALSE	TRUE
ADGB	ADGB	-0.0039666	1.45734	0.0964637	0.587965	0.492136	0.507864	TRUE	32.2402	1.79257	0	0.275014	up	0	All genes	FALSE	FALSE
PPP1R14C	PPP1R14C	-0.00295154	1.42568	0.0962464	0.608244	0.480452	0.519548	TRUE	30.9463	2.01331	0	0.112724	up	0	All genes	FALSE	FALSE
CCDC170	CCDC170	-0.00158687	2.61184	0.0967648	1.01385	0.249785	0.750215	TRUE	24.6119	1.08883	0	0.660148	up	0	All genes	TRUE	FALSE
SYNE1	SYNE1	-0.00135796	1.79824	0.0952634	0.745495	0.337518	0.662482	TRUE	27.2714	1.26822	0	0.363375	up	0	All genes	FALSE	FALSE
GTF2H5	GTF2H5	-0.00498036	1.57277	0.0939836	0.64663	0.316634	0.683366	TRUE	20.4236	2.06748	5.42118e-269	0.0655812	up	4.56026e-268	All genes	FALSE	FALSE
SYTL3	SYTL3	-0.0012999	1.25272	0.0982061	0.445854	0.646236	0.353764	TRUE	37.1771	2.55784	0	0.119428	up	0	All genes	FALSE	FALSE
RSPH3	RSPH3	-0.00251839	1.44578	0.0946833	0.594613	0.461293	0.538707	TRUE	30.5437	1.71912	0	0.177268	up	0	All genes	FALSE	FALSE
TCP1	TCP1	-0.0031944	1.3664	0.0984062	0.532082	0.463181	0.536819	TRUE	28.9066	3.11344	5.35283e-162	0.0367262	up	2.91674e-161	All genes	FALSE	FALSE
PACRG	PACRG	-0.00124035	1.67591	0.0948943	0.679539	0.399564	0.600436	TRUE	29.7744	1.49255	0	0.36308	up	0	All genes	FALSE	FALSE
C6orf118	C6orf118	-0.00079879	1.84545	0.095147	0.762108	0.335843	0.664157	TRUE	27.9738	1.31629	0	0.451532	up	0	All genes	FALSE	FALSE
MLLT4	MLLT4	-0.00200671	1.66334	0.0968349	0.721355	0.298771	0.701229	TRUE	23.4423	1.4077	0	0.173575	up	0	All genes	FALSE	FALSE
IQCE	IQCE	-0.000231302	1.28683	0.0975554	0.477326	0.615007	0.384993	TRUE	35.6681	2.29677	0	0.157207	up	0	All genes	FALSE	FALSE
EIF2AK1	EIF2AK1	-0.00262586	1.30556	0.0983277	0.488706	0.515166	0.484834	TRUE	32.7384	3.55188	1.06424e-141	0.0323958	up	5.13449e-141	All genes	FALSE	TRUE
RPA3	RPA3	-0.00103903	1.93659	0.0926163	0.845538	0.259134	0.740866	TRUE	21.8547	1.28601	0	0.201865	up	0	All genes	FALSE	FALSE
DNAH11	DNAH11	-0.00299957	1.65193	0.0950339	0.680702	0.390126	0.609874	TRUE	29.0592	1.42743	0	0.320786	up	0	All genes	FALSE	FALSE
OSBPL3	OSBPL3	-0.00104359	1.27509	0.0983804	0.462808	0.597184	0.402816	TRUE	35.9625	2.58489	4.94047e-304	0.0876157	up	4.7983e-303	All genes	FALSE	FALSE
HIBADH	HIBADH	-0.0012419	1.29723	0.0963981	0.481011	0.543967	0.456033	TRUE	34.2912	3.10185	3.20214e-196	0.0473539	up	2.04496e-195	All genes	FALSE	TRUE
PRR15	PRR15	-0.0040352	1.37052	0.0979701	0.57215	0.552706	0.447294	TRUE	34.4874	2.6781	6.39265e-267	0.0689327	up	5.33352e-266	All genes	FALSE	FALSE
2023-09-07	2023-09-07	-0.00449042	1.50597	0.0944301	0.611958	0.343551	0.656449	TRUE	19.1973	2.76783	3.64857e-148	0.0342124	up	1.8362e-147	All genes	FALSE	FALSE
POLD2	POLD2	-0.00252122	1.44232	0.0959174	0.58445	0.427861	0.572139	TRUE	28.3127	1.92646	0	0.105117	up	0	All genes	FALSE	FALSE
H2AFV	H2AFV	-0.00190681	1.50936	0.0939698	0.638883	0.330953	0.669047	TRUE	19.3094	2.5456	1.70591e-174	0.0408923	up	9.97412e-174	All genes	FALSE	TRUE
C7orf57	C7orf57	-0.00302881	1.63289	0.0972671	0.658923	0.410095	0.589905	TRUE	30.1163	1.53073	0	0.354815	up	0	All genes	FALSE	FALSE
ABCA13	ABCA13	-0.00130022	1.48584	0.0968254	0.678076	0.530368	0.469632	TRUE	33.2126	2.16954	0	0.112712	up	0	All genes	FALSE	FALSE
GBAS	GBAS	-0.0027956	1.40106	0.096703	0.542316	0.428486	0.571514	TRUE	26.7477	2.69341	1.36514e-200	0.0460291	up	8.92038e-200	All genes	FALSE	FALSE
FKBP6	FKBP6	-0.00195104	1.44143	0.0973027	0.646019	0.661674	0.338326	TRUE	36.8247	2.59673	0	0.18201	up	0	All genes	FALSE	FALSE
WBSCR22	WBSCR22	-0.00316113	1.45418	0.0956547	0.591599	0.379721	0.620279	TRUE	23.3767	2.56685	1.98696e-196	0.0452764	up	1.2739e-195	All genes	FALSE	FALSE
CLDN3	CLDN3	-0.00219536	2.29696	0.0908212	1.04649	0.18699	0.81301	TRUE	16.3777	1.3751	0	0.150002	up	0	All genes	FALSE	TRUE
WBSCR27	WBSCR27	-0.0030957	1.80063	0.0951967	0.874766	0.413893	0.586107	TRUE	29.1743	1.56582	0	0.203968	up	0	All genes	TRUE	FALSE
CTB-51J22.1	CTB-51J22.1	-0.00273555	1.53642	0.0973726	0.619904	0.467085	0.532915	TRUE	31.6857	1.72247	0	0.307136	up	0	All genes	FALSE	FALSE
STYXL1	STYXL1	-0.00283647	1.42057	0.0961519	0.571501	0.453776	0.546224	TRUE	29.6453	1.92294	0	0.115241	up	0	All genes	FALSE	FALSE
CCDC146	CCDC146	0.00148806	2.3743	0.0956076	0.983454	0.239108	0.760892	TRUE	23.4786	1.00326	0	0.520168	up	0	All genes	TRUE	FALSE
TP53TG1	TP53TG1	-0.00573548	1.50663	0.0947103	0.630032	0.370633	0.629367	TRUE	24.042	2.20208	5.09916e-271	0.0642133	up	4.33402e-270	All genes	FALSE	FALSE
SRI	SRI	1.22206	3.15576	0.866544	0.855907	0.302882	0.697118	TRUE	21.0476	1.31248	0	0.186235	up	0	All genes	TRUE	TRUE
CFAP69	CFAP69	-0.00214561	1.39336	0.0979379	0.535022	0.511729	0.488271	TRUE	32.4961	1.82943	0	0.22316	up	0	All genes	FALSE	FALSE
AKAP9	AKAP9	-0.00196058	2.40586	0.0923025	0.997113	0.135115	0.864885	TRUE	15.4199	1.13436	0	0.250752	up	0	All genes	FALSE	FALSE
PDK4	PDK4	-0.00263423	1.47368	0.0949154	0.800861	0.571661	0.428339	TRUE	35.766	2.64491	2.23152e-287	0.0796313	up	2.0434e-286	All genes	FALSE	TRUE
BAIAP2L1	BAIAP2L1	-0.00234404	1.32795	0.0972565	0.521171	0.519231	0.480769	TRUE	32.6178	2.52079	2.78332e-282	0.0707673	up	2.50101e-281	All genes	FALSE	FALSE
BUD31	BUD31	-0.00590447	1.48645	0.0947728	0.595835	0.359221	0.640779	TRUE	22.5648	2.31647	3.59416e-233	0.0548259	up	2.64479e-232	All genes	FALSE	FALSE
TRIP6	TRIP6	-0.000557459	1.15529	0.100349	0.367553	0.83409	0.16591	TRUE	17.4168	2.50487	3.1981e-158	0.0728764	down	1.69845e-157	All genes	FALSE	FALSE
MUC12	MUC12	-0.00238251	1.35564	0.0973268	0.612473	0.699917	0.300083	TRUE	37.5721	2.85801	1.44892e-274	0.172037	up	1.25768e-273	All genes	FALSE	TRUE
RP11-395B7.4	RP11-395B7.4	-0.0034251	1.80211	0.0959754	0.801976	0.471917	0.528083	TRUE	31.8902	1.75054	0	0.30333	up	0	All genes	TRUE	FALSE
TRIM56	TRIM56	-0.00203151	1.37124	0.0963879	0.567464	0.517208	0.482792	TRUE	32.5912	2.52217	1.08777e-281	0.0705508	up	9.74222e-281	All genes	FALSE	FALSE
IFT22	IFT22	-0.00555655	2.03946	0.0949439	0.867778	0.262717	0.737283	TRUE	23.4398	1.1236	0	0.318695	up	0	All genes	FALSE	FALSE
LRWD1	LRWD1	-0.00247743	1.45342	0.0969793	0.588277	0.490086	0.509914	TRUE	31.9466	1.75619	0	0.239973	up	0	All genes	FALSE	FALSE
EFCAB10	EFCAB10	0.000570918	1.75807	0.0961807	0.745116	0.37999	0.62001	TRUE	29.4343	1.45995	0	0.397391	up	0	All genes	FALSE	FALSE
CDHR3	CDHR3	0.00163733	2.40279	0.0961132	0.91779	0.259883	0.740117	TRUE	25.1312	1.12225	0	0.643114	up	0	All genes	FALSE	FALSE
CAV2	CAV2	-0.00206007	1.22103	0.098777	0.541539	0.827059	0.172941	TRUE	20.3108	1.80539	0	0.155782	down	0	All genes	FALSE	FALSE
CAV1	CAV1	0.000954534	1.26093	0.098267	0.718745	0.872885	0.127115	TRUE	15.6106	3.27324	2.09872e-88	0.0559206	down	6.93461e-88	All genes	TRUE	TRUE
TSPAN12	TSPAN12	-0.000600263	1.13576	0.0986246	0.33102	0.884573	0.115427	TRUE	19.5129	2.23097	5.91969e-198	0.139768	down	3.8223e-197	All genes	FALSE	FALSE
IQUB	IQUB	-0.00188202	1.3618	0.0973259	0.520781	0.559422	0.440578	TRUE	33.9306	2.03892	0	0.226736	up	0	All genes	FALSE	FALSE
LRRC4	LRRC4	-0.00117719	1.2917	0.0981578	0.498689	0.634823	0.365177	TRUE	37.3396	2.65238	1.21964e-304	0.0985771	up	1.18878e-303	All genes	FALSE	FALSE
UBE2H	UBE2H	-0.00498235	1.43759	0.0969133	0.60432	0.449547	0.550453	TRUE	28.8327	2.43009	5.85922e-265	0.0628449	up	4.86858e-264	All genes	FALSE	FALSE
CEP41	CEP41	-0.00336391	1.24384	0.0986958	0.438248	0.649843	0.350157	TRUE	36.9633	2.50913	0	0.135402	up	0	All genes	FALSE	FALSE
TTC26	TTC26	-0.00266673	1.3247	0.0964717	0.49625	0.572731	0.427269	TRUE	34.2584	2.07907	0	0.200688	up	0	All genes	FALSE	FALSE
PIP	PIP	-0.00214202	1.90353	0.0944812	1.16655	0.556138	0.443862	TRUE	34.8071	2.44316	0	0.0921503	up	0	All genes	FALSE	FALSE
PDIA4	PDIA4	-0.00170284	1.52152	0.0941963	0.620794	0.325559	0.674441	TRUE	19.2728	2.41595	1.54689e-192	0.0456139	up	9.75676e-192	All genes	FALSE	FALSE
LRRC61	LRRC61	-0.00202572	1.34717	0.0975699	0.548045	0.578009	0.421991	TRUE	34.746	2.21192	0	0.13479	up	0	All genes	FALSE	FALSE
DNAJB6	DNAJB6	-0.00371729	1.45543	0.0961348	0.573442	0.376649	0.623351	TRUE	23.5388	2.41243	6.72669e-223	0.0519094	up	4.78603e-222	All genes	FALSE	FALSE
PTPRN2	PTPRN2	-0.00323427	1.39768	0.0983956	0.553472	0.51531	0.48469	TRUE	32.3831	1.91326	0	0.158551	up	0	All genes	FALSE	FALSE
WDR60	WDR60	-0.00318867	1.46727	0.0972004	0.604256	0.444976	0.555024	TRUE	29.977	1.65764	0	0.186279	up	0	All genes	FALSE	FALSE
SYAP1	SYAP1	-0.00195486	1.42813	0.0942278	0.594799	0.430808	0.569192	TRUE	27.8429	2.30894	3.62377e-283	0.0673582	up	3.2706e-282	All genes	FALSE	FALSE
APOO	APOO	-0.00409268	1.39931	0.0965502	0.571919	0.48695	0.51305	TRUE	31.1768	2.00979	0	0.115552	up	0	All genes	FALSE	FALSE
DMD	DMD	-0.00212374	1.29029	0.097307	0.484819	0.590343	0.409657	TRUE	35.4893	2.45223	0	0.0990907	up	0	All genes	FALSE	FALSE
CFAP47	CFAP47	-0.00098844	1.42272	0.0966509	0.564622	0.506443	0.493557	TRUE	32.6226	1.84738	0	0.268706	up	0	All genes	FALSE	FALSE
RPGR	RPGR	-0.00372225	1.38681	0.0971395	0.550972	0.525875	0.474125	TRUE	32.9085	1.88901	0	0.206416	up	0	All genes	FALSE	FALSE
MID1IP1	MID1IP1	-0.00233815	1.29583	0.0984256	0.500556	0.591175	0.408825	TRUE	36.0582	2.70309	1.35891e-277	0.0767293	up	1.19095e-276	All genes	TRUE	FALSE
EFHC2	EFHC2	-0.00113718	1.27323	0.0983798	0.452793	0.627958	0.372042	TRUE	35.9284	2.34563	0	0.167059	up	0	All genes	FALSE	FALSE
RBM3	RBM3	-0.00343587	1.32034	0.0970385	0.594695	0.557433	0.442567	TRUE	25.7567	2.64213	2.36638e-201	0.0462226	down	1.5575e-200	All genes	TRUE	FALSE
PCSK1N	PCSK1N	-0.00287735	1.72934	0.094275	0.828257	0.440361	0.559639	TRUE	29.3026	1.92705	0	0.111856	up	0	All genes	TRUE	FALSE
SLC35A2	SLC35A2	-0.00149344	1.2519	0.0984754	0.431561	0.604093	0.395907	TRUE	36.0784	2.54686	0	0.093734	up	0	All genes	FALSE	FALSE
RIBC1	RIBC1	-0.00109733	1.36406	0.0972455	0.535821	0.557818	0.442182	TRUE	33.9187	2.03668	0	0.226479	up	0	All genes	FALSE	FALSE
HSD17B10	HSD17B10	-0.000610268	1.1557	0.0988158	0.359717	0.764453	0.235547	TRUE	15.2238	2.66853	7.79575e-138	0.0433705	down	3.68707e-137	All genes	FALSE	TRUE
FAM104B	FAM104B	-0.00263891	1.47289	0.0950893	0.616049	0.456096	0.543904	TRUE	30.1803	1.76108	0	0.155502	up	0	All genes	FALSE	FALSE
YIPF6	YIPF6	-0.00237655	1.24777	0.0974664	0.418077	0.574374	0.425626	TRUE	36.8829	3.82403	3.30025e-140	0.0333477	up	1.5801e-139	All genes	FALSE	TRUE
MAGT1	MAGT1	0.00107391	1.1114	0.0995133	0.300293	0.869611	0.130389	TRUE	15.6691	3.16408	6.35606e-96	0.0545675	down	2.21864e-95	All genes	FALSE	FALSE
NGFRAP1	NGFRAP1	-0.00253203	1.37874	0.0965152	0.638439	0.670399	0.329601	TRUE	21.902	1.64519	0	0.113353	down	0	All genes	FALSE	FALSE
MORF4L2	MORF4L2	-0.00204686	1.86082	0.0958463	0.778819	0.216535	0.783465	TRUE	18.2294	1.38099	0	0.152939	up	0	All genes	FALSE	FALSE
PIH1D3	PIH1D3	-0.00191257	1.59469	0.0966974	0.66171	0.456652	0.543348	TRUE	31.5174	1.70495	0	0.326351	up	0	All genes	FALSE	FALSE
TSC22D3	TSC22D3	-0.00347269	1.34762	0.0964886	0.667797	0.609212	0.390788	TRUE	21.0735	2.63763	1.41886e-172	0.0398468	down	8.21349e-172	All genes	FALSE	TRUE
PSMD10	PSMD10	-0.00217981	1.2966	0.0973137	0.470968	0.543764	0.456236	TRUE	33.7446	2.61695	2.01262e-272	0.0694119	up	1.72861e-271	All genes	FALSE	FALSE
PLS3	PLS3	0.000578038	1.14592	0.0984796	0.372044	0.871861	0.128139	TRUE	17.4345	2.73244	9.09711e-131	0.078477	down	4.08495e-130	All genes	FALSE	TRUE
PGRMC1	PGRMC1	-0.00453024	1.66259	0.0941291	0.722377	0.275106	0.724894	TRUE	15.3925	2.32506	4.15973e-183	0.0453309	up	2.51307e-182	All genes	FALSE	TRUE
AKAP14	AKAP14	-0.00413636	1.80054	0.0963421	0.766629	0.395313	0.604687	TRUE	29.8096	1.49843	0	0.375419	up	0	All genes	FALSE	FALSE
IDS	IDS	-0.00466535	1.42223	0.0957191	0.591597	0.447929	0.552071	TRUE	28.8355	2.32667	3.81609e-289	0.0693427	up	3.50617e-288	All genes	FALSE	FALSE
HMGB3	HMGB3	-0.00345462	1.47331	0.0953105	0.772727	0.584389	0.415611	TRUE	21.9016	2.99785	2.28424e-138	0.0312655	down	1.08349e-137	All genes	FALSE	TRUE
CETN2	CETN2	-0.00323346	3.11135	0.0988272	1.1419	0.185596	0.814404	TRUE	20.2393	0.949488	0	0.529753	up	0	All genes	TRUE	FALSE
CH17-340M24.3	CH17-340M24.3	-0.00325503	1.89947	0.0938471	0.839105	0.318238	0.681762	TRUE	25.8268	1.25138	0	0.287218	up	0	All genes	FALSE	FALSE
GDI1	GDI1	-0.00274757	1.31551	0.0972993	0.485466	0.519232	0.480768	TRUE	32.4029	2.3314	0	0.0851145	up	0	All genes	FALSE	FALSE
TUSC3	TUSC3	-0.00222996	2.03634	0.0922482	0.872716	0.228111	0.771889	TRUE	20.5875	1.20529	0	0.226087	up	0	All genes	FALSE	FALSE
PCM1	PCM1	-0.00400464	2.02221	0.093615	0.868325	0.204262	0.795738	TRUE	19.559	1.15651	0	0.243454	up	0	All genes	FALSE	FALSE
INTS10	INTS10	-0.00353265	1.28521	0.0971576	0.472718	0.526438	0.473562	TRUE	33.3358	3.35109	1.83553e-162	0.0378248	up	1.00151e-161	All genes	FALSE	FALSE
SARAF	SARAF	1.28617	3.23729	0.901112	0.82304	0.333674	0.666326	TRUE	25.6153	1.35555	0	0.219195	up	0	All genes	FALSE	FALSE
LEPROTL1	LEPROTL1	-0.00214334	1.24583	0.0960256	0.422043	0.576022	0.423978	TRUE	36.6832	3.5938	6.61219e-158	0.038147	up	3.50476e-157	All genes	FALSE	TRUE
PPP2CB	PPP2CB	-0.00132629	1.34714	0.0961354	0.535908	0.501103	0.498897	TRUE	31.6973	2.66342	4.58716e-244	0.05878	up	3.55821e-243	All genes	FALSE	FALSE
RAB11FIP1	RAB11FIP1	-0.000424594	1.60763	0.0928887	0.728299	0.315085	0.684915	TRUE	20.1289	2.19743	3.27226e-237	0.0570795	up	2.45886e-236	All genes	FALSE	TRUE
WHSC1L1	WHSC1L1	-0.00239675	1.36543	0.0957191	0.538045	0.443723	0.556277	TRUE	27.2433	3.22101	3.11778e-143	0.0321113	up	1.51674e-142	All genes	FALSE	FALSE
C8orf4	C8orf4	-0.000184359	1.47695	0.0996989	0.881543	0.884327	0.115673	TRUE	20.6738	1.66403	0	0.303067	down	0	All genes	FALSE	TRUE
VDAC3	VDAC3	-0.000119286	1.5689	0.0958638	0.652813	0.357128	0.642872	TRUE	24.7869	1.77138	0	0.107133	up	0	All genes	FALSE	FALSE
SMIM19	SMIM19	-0.00283599	1.60025	0.0945937	0.694579	0.326731	0.673269	TRUE	22.8503	1.79804	0	0.095992	up	0	All genes	FALSE	FALSE
EFCAB1	EFCAB1	-0.00183899	2.56223	0.0961073	0.980088	0.245857	0.754143	TRUE	24.3775	1.07912	0	0.674077	up	0	All genes	TRUE	FALSE
RB1CC1	RB1CC1	-0.00488989	1.56848	0.0940388	0.70227	0.357423	0.642577	TRUE	25.0147	1.78882	0	0.105801	up	0	All genes	FALSE	FALSE
RP11-53M11.3	RP11-53M11.3	-0.00382995	1.3019	0.0982921	0.487637	0.647734	0.352266	TRUE	36.4723	2.46116	0	0.169994	up	0	All genes	FALSE	FALSE
RP1	RP1	-0.00230734	1.41225	0.0971551	0.597502	0.537987	0.462013	TRUE	33.3985	1.95115	0	0.210968	up	0	All genes	FALSE	FALSE
TMEM68	TMEM68	-0.000237245	1.30043	0.0968508	0.466872	0.562524	0.437476	TRUE	34.2251	2.32836	0	0.100778	up	0	All genes	FALSE	FALSE
PPP1R42	PPP1R42	-0.00110632	1.50043	0.097163	0.611203	0.479752	0.520248	TRUE	31.9761	1.75957	0	0.292876	up	0	All genes	FALSE	FALSE
CSPP1	CSPP1	-0.00288718	1.60605	0.0951401	0.679439	0.395386	0.604614	TRUE	28.8391	1.44563	0	0.269485	up	0	All genes	FALSE	FALSE
C8orf34	C8orf34	-0.00322034	1.32075	0.0978692	0.489419	0.596867	0.403133	TRUE	34.9085	2.20698	0	0.211136	up	0	All genes	FALSE	FALSE
ZC2HC1A	ZC2HC1A	-0.00273028	1.44217	0.0968671	0.604075	0.465315	0.534685	TRUE	30.6873	1.74559	0	0.17115	up	0	All genes	FALSE	FALSE
TPD52	TPD52	-7.09843e-05	1.15115	0.0981354	0.364977	0.799902	0.200098	TRUE	16.5372	2.51925	1.41831e-155	0.0584751	down	7.44042e-155	All genes	FALSE	FALSE
FABP5	FABP5	-0.00105037	1.55442	0.097892	1.06388	0.817966	0.182034	TRUE	21.2132	1.59416	0	0.211937	down	0	All genes	TRUE	FALSE
OTUD6B-AS1	OTUD6B-AS1	-0.00395387	1.3138	0.0962006	0.502238	0.511765	0.488235	TRUE	32.433	3.29123	2.19244e-163	0.0377684	up	1.20591e-162	All genes	FALSE	TRUE
TMEM67	TMEM67	-0.00324387	1.51839	0.0975049	0.60374	0.425318	0.574682	TRUE	30.0379	1.53204	0	0.286967	up	0	All genes	FALSE	FALSE
TP53INP1	TP53INP1	-0.00285828	1.27337	0.0978834	0.462544	0.595193	0.404807	TRUE	36.5772	2.93151	7.77415e-239	0.0634882	up	5.89047e-238	All genes	FALSE	TRUE
LAPTM4B	LAPTM4B	-0.000889185	1.12421	0.0985651	0.343697	0.88436	0.11564	TRUE	18.4039	2.51437	7.58828e-154	0.105002	down	3.95287e-153	All genes	FALSE	TRUE
RGS22	RGS22	-0.00318365	1.66299	0.0950508	0.712041	0.418473	0.581527	TRUE	30.4701	1.57238	0	0.349428	up	0	All genes	FALSE	FALSE
SPAG1	SPAG1	-0.00231344	1.5996	0.094945	0.682242	0.384715	0.615285	TRUE	27.9025	1.46887	0	0.215122	up	0	All genes	FALSE	FALSE
AZIN1	AZIN1	-0.002778	1.83525	0.0952324	0.79954	0.274707	0.725293	TRUE	23.1268	1.24723	0	0.232091	up	0	All genes	FALSE	FALSE
EIF3H	EIF3H	-0.00228896	1.34702	0.0956306	0.622676	0.528738	0.471262	TRUE	27.0299	3.17854	5.4246e-146	0.0327643	down	2.6886e-145	All genes	FALSE	FALSE
MED30	MED30	-0.00160011	1.24978	0.0969721	0.447662	0.576657	0.423343	TRUE	35.8937	3.01849	2.15136e-219	0.0557945	up	1.51355e-218	All genes	FALSE	FALSE
SQLE	SQLE	-0.00218932	1.43433	0.0952765	0.629787	0.479436	0.520564	TRUE	31.044	1.97852	0	0.119411	up	0	All genes	FALSE	FALSE
LRRC6	LRRC6	-0.00152905	1.54669	0.0957109	0.662545	0.452876	0.547124	TRUE	31.0034	1.63732	0	0.271097	up	0	All genes	FALSE	FALSE
LYNX1	LYNX1	-4.69517e-05	1.38256	0.098406	0.970592	0.871066	0.128934	TRUE	17.7068	2.75414	6.23536e-129	0.0844593	down	2.77097e-128	All genes	FALSE	TRUE
LY6E	LY6E	-0.00516626	1.89757	0.0926212	1.12859	0.333276	0.666724	TRUE	37.5702	2.82016	5.20129e-269	0.0793521	down	4.37981e-268	All genes	TRUE	TRUE
RHPN1	RHPN1	-0.00273161	1.28826	0.0990298	0.471958	0.580883	0.419117	TRUE	34.5876	2.15082	0	0.153642	up	0	All genes	FALSE	FALSE
MAPK15	MAPK15	-0.00416775	1.76293	0.0964714	0.733606	0.35394	0.64606	TRUE	28.2611	1.33967	0	0.392111	up	0	All genes	FALSE	FALSE
FAM83H-AS1	FAM83H-AS1	-0.00283322	1.26841	0.098937	0.478496	0.631174	0.368826	TRUE	36.4526	2.42884	0	0.135151	up	0	All genes	FALSE	FALSE
PPP1R16A	PPP1R16A	-0.00143668	1.39843	0.0956657	0.568805	0.429871	0.570129	TRUE	28.1582	2.08532	0	0.0862751	up	0	All genes	FALSE	FALSE
ARHGAP39	ARHGAP39	0.00148695	1.22962	0.098333	0.426766	0.672012	0.327988	TRUE	37.5492	2.62021	0	0.139669	up	0	All genes	FALSE	TRUE
SMARCA2	SMARCA2	-0.00200397	1.27512	0.0972964	0.470208	0.562015	0.437985	TRUE	36.4247	3.93537	2.34705e-130	0.0305326	up	1.05218e-129	All genes	FALSE	TRUE
IL33	IL33	-0.00173089	1.45467	0.0990916	0.862855	0.864356	0.135644	TRUE	18.5328	2.41682	1.9581e-168	0.104728	down	1.10226e-167	All genes	FALSE	TRUE
MPDZ	MPDZ	-0.00163472	1.30223	0.0973678	0.489167	0.605195	0.394805	TRUE	35.4883	2.28362	0	0.142466	up	0	All genes	FALSE	FALSE
PSIP1	PSIP1	-0.00256171	1.34097	0.0965418	0.532226	0.520531	0.479469	TRUE	32.7975	2.63478	1.50761e-259	0.0641884	up	1.22529e-258	All genes	FALSE	FALSE
RRAGA	RRAGA	-0.00332993	1.5051	0.0969685	0.627662	0.372302	0.627698	TRUE	24.5879	2.07593	0	0.0744847	up	0	All genes	FALSE	FALSE
FOCAD	FOCAD	-0.000297344	1.23974	0.0976371	0.437302	0.64141	0.35859	TRUE	37.1177	2.56428	0	0.113387	up	0	All genes	FALSE	FALSE
HACD4	HACD4	-0.002304	1.62532	0.0955675	0.717706	0.386296	0.613704	TRUE	28.1893	1.45952	0	0.228522	up	0	All genes	FALSE	FALSE
IFT74	IFT74	-0.0011502	1.32781	0.0975894	0.519124	0.559954	0.440046	TRUE	34.0558	2.15572	0	0.130621	up	0	All genes	FALSE	FALSE
C9orf72	C9orf72	-0.0020431	1.30777	0.0962225	0.485181	0.577483	0.422517	TRUE	34.4585	2.12467	0	0.16038	up	0	All genes	FALSE	FALSE
DNAJA1	DNAJA1	-0.00376459	1.65493	0.0945402	0.734824	0.288882	0.711118	TRUE	19.1015	1.98259	9.49153e-278	0.0693132	up	8.32727e-277	All genes	FALSE	FALSE
CHMP5	CHMP5	-0.00528387	1.68265	0.0953919	0.699943	0.267815	0.732185	TRUE	16.6684	2.03795	7.68244e-243	0.061797	up	5.91983e-242	All genes	FALSE	FALSE
C9orf24	C9orf24	-0.00168404	4.02188	0.0999757	1.18453	0.208624	0.791376	TRUE	21.4574	1.02679	0	0.722831	up	0	All genes	TRUE	FALSE
DNAI1	DNAI1	-0.00450751	1.58635	0.0952134	0.644516	0.407898	0.592102	TRUE	30.0467	1.52253	0	0.354017	up	0	All genes	FALSE	FALSE
FAM166B	FAM166B	-0.00405774	2.09233	0.096541	0.814111	0.299504	0.700496	TRUE	26.7609	1.22349	0	0.539863	up	0	All genes	FALSE	FALSE
SPAG8	SPAG8	-0.00157898	1.6873	0.0959045	0.676547	0.379126	0.620874	TRUE	29.3086	1.44597	0	0.398212	up	0	All genes	FALSE	FALSE
RP11-144A16.8	RP11-144A16.8	-0.00357972	1.67721	0.0968024	0.732023	0.459008	0.540992	TRUE	31.7328	1.73938	0	0.333913	up	0	All genes	FALSE	FALSE
FAM27C	FAM27C	-0.00165501	1.31916	0.0980022	0.506523	0.604709	0.395291	TRUE	35.2668	2.23421	0	0.173864	up	0	All genes	FALSE	FALSE
RP11-395E19.6	RP11-395E19.6	-0.00418653	1.39493	0.0978165	0.583428	0.599712	0.400288	TRUE	35.0846	2.2666	0	0.221931	up	0	All genes	FALSE	FALSE
C9orf135	C9orf135	-0.00350927	2.12142	0.095958	0.844314	0.305771	0.694229	TRUE	26.7471	1.20998	0	0.495766	up	0	All genes	FALSE	FALSE
PRUNE2	PRUNE2	-0.00296665	1.33558	0.0981444	0.541525	0.6515	0.3485	TRUE	36.4164	2.5232	0	0.192007	up	0	All genes	FALSE	TRUE
GNA14	GNA14	-0.00170852	1.23163	0.0992252	0.419141	0.663025	0.336975	TRUE	37.536	2.60625	0	0.126613	up	0	All genes	FALSE	TRUE
KIF27	KIF27	-0.000455517	1.229	0.0981424	0.415519	0.659093	0.340907	TRUE	37.3059	2.56699	0	0.131554	up	0	All genes	FALSE	FALSE
ISCA1	ISCA1	-0.00125733	1.27862	0.0978667	0.459955	0.553858	0.446142	TRUE	34.5138	2.85112	7.22963e-235	0.0588244	up	5.36346e-234	All genes	FALSE	TRUE
NINJ1	NINJ1	-0.00162478	1.22647	0.0988097	0.502872	0.822416	0.177584	TRUE	20.9176	1.65161	0	0.18657	down	0	All genes	FALSE	FALSE
FAM120A	FAM120A	-0.0024588	1.44378	0.0958286	0.604355	0.410838	0.589162	TRUE	25.2761	2.85251	2.29227e-170	0.0386485	up	1.30658e-169	All genes	FALSE	TRUE
CCDC180	CCDC180	-0.00499982	1.41182	0.0981406	0.570428	0.526742	0.473258	TRUE	33.1836	1.93036	0	0.255118	up	0	All genes	FALSE	FALSE
FSD1L	FSD1L	-0.00288442	1.27794	0.097233	0.448983	0.621966	0.378034	TRUE	35.5756	2.31986	0	0.194879	up	0	All genes	FALSE	FALSE
CTNNAL1	CTNNAL1	-0.00185034	1.29639	0.0992777	0.497388	0.625943	0.374057	TRUE	36.6617	2.51016	0	0.111959	up	0	All genes	FALSE	FALSE
EPB41L4B	EPB41L4B	-0.00325128	1.30979	0.0977941	0.523391	0.605391	0.394609	TRUE	35.8579	2.38814	0	0.119112	up	0	All genes	FALSE	TRUE
PTBP3	PTBP3	-0.00218295	1.35823	0.0971811	0.535916	0.474501	0.525499	TRUE	29.8339	3.09419	2.98686e-169	0.0386287	up	1.69186e-168	All genes	FALSE	TRUE
CNTRL	CNTRL	-0.0021089	1.51651	0.0959249	0.63859	0.45152	0.54848	TRUE	30.6287	1.62936	0	0.231166	up	0	All genes	FALSE	FALSE
STOM	STOM	-0.00392131	1.75398	0.0926326	0.79082	0.272366	0.727634	TRUE	14.9059	2.37883	5.15413e-173	0.0427665	up	2.99424e-172	All genes	FALSE	TRUE
MORN5	MORN5	0.000247073	2.49445	0.0971297	0.930276	0.271261	0.728739	TRUE	25.4832	1.13148	0	0.601856	up	0	All genes	TRUE	FALSE
STRBP	STRBP	-0.00142027	1.31466	0.0993018	0.507693	0.574439	0.425561	TRUE	34.8381	2.37765	0	0.101264	up	0	All genes	FALSE	FALSE
WDR38	WDR38	-1.8236e-05	2.14657	0.0955598	0.97072	0.313448	0.686552	TRUE	27.261	1.25247	0	0.474555	up	0	All genes	FALSE	FALSE
GAPVD1	GAPVD1	-0.00382546	1.32069	0.0963816	0.510448	0.540129	0.459871	TRUE	33.8457	2.78655	2.38034e-240	0.0596861	up	1.81199e-239	All genes	FALSE	FALSE
CFAP157	CFAP157	-0.00302006	2.52169	0.0967132	0.904115	0.246066	0.753934	TRUE	24.2267	1.06521	0	0.669365	up	0	All genes	FALSE	FALSE
TTC16	TTC16	-0.00087843	1.23912	0.0997071	0.425067	0.687725	0.312275	TRUE	37.3819	2.71199	3.35449e-302	0.172	up	3.23871e-301	All genes	FALSE	FALSE
AK1	AK1	-0.00242517	1.55957	0.0942713	0.773676	0.390705	0.609295	TRUE	25.9481	2.2668	3.20045e-274	0.0647646	up	2.77214e-273	All genes	TRUE	FALSE
COQ4	COQ4	-0.00346758	1.94828	0.0933225	0.820867	0.201471	0.798529	TRUE	18.8309	1.21535	0	0.210914	up	0	All genes	FALSE	FALSE
ODF2	ODF2	-0.00178489	1.30592	0.0959162	0.488788	0.56225	0.43775	TRUE	34.0522	2.13345	0	0.136827	up	0	All genes	FALSE	FALSE
SPTAN1	SPTAN1	-0.00285919	1.33249	0.0968842	0.504585	0.48507	0.51493	TRUE	30.55	2.82757	9.45667e-208	0.0485098	up	6.39421e-207	All genes	FALSE	FALSE
WDR34	WDR34	-0.00505826	1.71394	0.0948698	0.732512	0.295409	0.704591	TRUE	22.5113	1.49541	0	0.144282	up	0	All genes	FALSE	FALSE
ENDOG	ENDOG	-0.0022473	1.77206	0.0957449	0.763275	0.358835	0.641165	TRUE	27.7602	1.33422	0	0.310321	up	0	All genes	FALSE	FALSE
PHYHD1	PHYHD1	-0.000368405	1.15485	0.100361	0.351891	0.802694	0.197306	TRUE	15.2858	2.78575	8.31019e-125	0.0469587	down	3.59141e-124	All genes	FALSE	FALSE
ASS1	ASS1	-0.000814766	1.62132	0.0975413	0.895332	0.769062	0.230938	TRUE	23.1036	1.18531	0	0.374792	down	0	All genes	FALSE	FALSE
CFAP77	CFAP77	-0.00139831	1.69208	0.0967631	0.700703	0.411962	0.588038	TRUE	30.2685	1.5503	0	0.361938	up	0	All genes	FALSE	FALSE
AK8	AK8	-0.0012272	1.32963	0.0983095	0.496697	0.571978	0.428022	TRUE	34.2773	2.11009	0	0.233031	up	0	All genes	FALSE	FALSE
C9orf9	C9orf9	-0.00129386	2.01673	0.0927902	0.858842	0.304212	0.695788	TRUE	26.1178	1.17576	0	0.401778	up	0	All genes	FALSE	FALSE
SURF2	SURF2	-0.00164513	1.28807	0.0975255	0.472504	0.545127	0.454873	TRUE	34.0235	2.79805	7.47899e-240	0.0597429	up	5.67736e-239	All genes	FALSE	FALSE
C9orf116	C9orf116	0.00175631	3.05943	0.0982278	1.09922	0.224403	0.775597	TRUE	22.7014	0.977979	0	0.637077	up	0	All genes	TRUE	FALSE
UBAC1	UBAC1	-0.00441693	1.60607	0.0931296	0.704248	0.372389	0.627611	TRUE	27.1977	1.4861	0	0.192648	up	0	All genes	FALSE	FALSE
WI2-1959D15.1	WI2-1959D15.1	-0.00205379	1.28253	0.099451	0.492406	0.665979	0.334021	TRUE	36.792	2.59867	0	0.184383	up	0	All genes	FALSE	FALSE
NPDC1	NPDC1	-0.00141986	1.3215	0.0985223	0.589205	0.859579	0.140421	TRUE	21.1253	1.45685	0	0.328722	down	0	All genes	FALSE	FALSE
IFITM2	IFITM2	-0.00334377	1.72509	0.0942611	0.917419	0.457989	0.542011	TRUE	31.9523	2.71749	1.8627e-236	0.0568618	down	1.39455e-235	All genes	FALSE	TRUE
IFITM1	IFITM1	-0.00132217	1.74508	0.0967939	1.09065	0.660682	0.339318	TRUE	23.967	1.34621	0	0.199585	down	0	All genes	FALSE	FALSE
SIGIRR	SIGIRR	-0.000426034	1.36781	0.0967589	0.521077	0.434114	0.565886	TRUE	27.7753	2.31396	2.99679e-281	0.0668294	up	2.66642e-280	All genes	FALSE	FALSE
PNPLA2	PNPLA2	-0.00127898	1.26811	0.0976102	0.518231	0.599491	0.400509	TRUE	21.3918	2.99777	3.84507e-136	0.0308003	down	1.79364e-135	All genes	FALSE	TRUE
CRACR2B	CRACR2B	-0.0020919	1.25805	0.0981309	0.519362	0.703241	0.296759	TRUE	18.5944	1.99642	3.72127e-268	0.0704774	down	3.12067e-267	All genes	FALSE	FALSE
MUC5B	MUC5B	-0.000260667	3.1146	0.0994293	1.66004	0.843313	0.156687	TRUE	21.7626	1.31368	0	0.396215	down	0	All genes	FALSE	FALSE
SYT8	SYT8	-0.00249499	2.15594	0.0930145	1.08285	0.363073	0.636927	TRUE	21.6777	2.77606	1.93178e-159	0.036444	up	1.03535e-158	All genes	TRUE	FALSE
PHLDA2	PHLDA2	-0.00158875	1.36906	0.0989227	0.823663	0.856685	0.143315	TRUE	20.9582	1.61343	0	0.260374	down	0	All genes	FALSE	FALSE
CARS	CARS	-0.0032022	1.575	0.0942451	0.737817	0.451564	0.548436	TRUE	30.1072	1.80597	0	0.142755	up	0	All genes	FALSE	FALSE
CNGA4	CNGA4	0.000111407	1.20492	0.0997046	0.38802	0.723525	0.276475	TRUE	37.4866	2.99499	1.87026e-250	0.178077	up	1.48026e-249	All genes	FALSE	TRUE
STK33	STK33	-0.00321816	1.90791	0.0962866	0.791218	0.305005	0.694995	TRUE	26.2954	1.17917	0	0.425354	up	0	All genes	FALSE	FALSE
C11orf16	C11orf16	-0.00186577	1.39646	0.0981338	0.530254	0.510708	0.489292	TRUE	32.571	1.83476	0	0.248164	up	0	All genes	FALSE	FALSE
ZBED5-AS1	ZBED5-AS1	-0.0017161	1.38747	0.0966429	0.544416	0.512563	0.487437	TRUE	32.2683	1.92124	0	0.15255	up	0	All genes	FALSE	FALSE
SAA1	SAA1	-0.000400561	2.48803	0.0974577	1.76494	0.680885	0.319115	TRUE	14.5974	2.5736	3.18618e-148	0.0359318	down	1.60448e-147	All genes	FALSE	FALSE
LDHA	LDHA	-0.00084033	1.44901	0.0949492	0.817927	0.611508	0.388492	TRUE	24.8659	1.64832	0	0.127137	down	0	All genes	FALSE	FALSE
TSG101	TSG101	-0.00273796	1.32119	0.0968612	0.492137	0.487979	0.512021	TRUE	30.6624	3.17438	2.04496e-165	0.0378352	up	1.13396e-164	All genes	FALSE	TRUE
RP11-428C19.4	RP11-428C19.4	-0.00243597	1.28464	0.0975866	0.467729	0.653649	0.346351	TRUE	36.5901	2.4948	0	0.172324	up	0	All genes	FALSE	FALSE
MUC15	MUC15	-0.00410649	1.47126	0.0965404	0.594528	0.451389	0.548611	TRUE	29.8821	1.75222	0	0.152915	up	0	All genes	FALSE	FALSE
CCDC34	CCDC34	-0.00244607	1.32256	0.0989726	0.532386	0.587479	0.412521	TRUE	35.0909	2.2632	0	0.130426	up	0	All genes	FALSE	FALSE
DCDC1	DCDC1	0.000422925	1.31011	0.0967839	0.470022	0.607577	0.392423	TRUE	35.2197	2.23929	0	0.190132	up	0	All genes	FALSE	FALSE
HIPK3	HIPK3	-0.00214714	1.30255	0.0968365	0.494554	0.519622	0.480378	TRUE	32.5452	2.43304	9.11247e-303	0.0769953	up	8.80836e-302	All genes	FALSE	FALSE
CAT	CAT	-0.00292716	1.48029	0.0961345	0.616401	0.412539	0.587461	TRUE	27.0677	2.11355	0	0.0793429	up	0	All genes	FALSE	FALSE
TRIM44	TRIM44	0.000729525	1.27194	0.0992712	0.460633	0.572286	0.427714	TRUE	37.0577	3.92261	5.74147e-134	0.0317284	up	2.64353e-133	All genes	FALSE	TRUE
C11orf74	C11orf74	-0.00240122	1.62597	0.0953865	0.699841	0.403789	0.596211	TRUE	29.0406	1.4802	0	0.251376	up	0	All genes	FALSE	FALSE
MDK	MDK	-0.00257308	1.74415	0.0949528	1.08508	0.599796	0.400204	TRUE	26.7143	1.43175	0	0.205679	down	0	All genes	TRUE	FALSE
C11orf49	C11orf49	-0.0035352	1.40494	0.0966365	0.537883	0.455695	0.544305	TRUE	29.8156	1.82592	0	0.13454	up	0	All genes	FALSE	FALSE
CELF1	CELF1	-0.00444127	1.4133	0.0959657	0.599251	0.439118	0.560882	TRUE	28.2584	2.42491	1.19114e-260	0.0615201	up	9.74873e-260	All genes	FALSE	FALSE
AGBL2	AGBL2	-0.00321116	1.42878	0.096347	0.594305	0.507784	0.492216	TRUE	32.6793	1.85335	0	0.261424	up	0	All genes	FALSE	FALSE
TNKS1BP1	TNKS1BP1	-0.000646127	1.12352	0.0992388	0.330547	0.844307	0.155693	TRUE	17.5448	2.57822	3.35597e-150	0.0734446	down	1.71215e-149	All genes	FALSE	FALSE
MS4A8	MS4A8	0.00085568	2.60067	0.0927411	1.01458	0.174427	0.825573	TRUE	19.188	0.984567	0	0.3974	up	0	All genes	TRUE	FALSE
TMEM138	TMEM138	0.000595768	1.24433	0.0983338	0.428035	0.616788	0.383212	TRUE	37.0708	2.78992	6.13788e-270	0.0773915	up	5.20064e-269	All genes	FALSE	FALSE
PPP1R32	PPP1R32	-0.00130002	1.68894	0.0970377	0.764832	0.447031	0.552969	TRUE	31.1569	1.65142	0	0.304227	up	0	All genes	FALSE	FALSE
LRRC10B	LRRC10B	-0.00320643	1.5232	0.0957308	0.668002	0.490166	0.509834	TRUE	32.4214	1.82703	0	0.293443	up	0	All genes	FALSE	FALSE
SCGB2A1	SCGB2A1	-0.00296896	1.68618	0.0953454	0.848425	0.490055	0.509945	TRUE	32.2287	1.79178	0	0.235367	up	0	All genes	FALSE	FALSE
SCGB1A1	SCGB1A1	1.1989	7.84141	1.00306	3.18248	0.809353	0.190647	TRUE	18.3937	1.0153	0	0.351482	down	0	All genes	FALSE	FALSE
PLA2G16	PLA2G16	-0.000734992	1.48223	0.0959141	0.612809	0.380994	0.619006	TRUE	22.3705	2.9231	1.55841e-147	0.0334182	up	7.80449e-147	All genes	FALSE	FALSE
OTUB1	OTUB1	-0.00437373	1.45134	0.0960854	0.570797	0.363926	0.636074	TRUE	20.4498	2.93638	1.54463e-137	0.0312967	up	7.28438e-137	All genes	FALSE	TRUE
STIP1	STIP1	-0.00275056	1.30165	0.0970432	0.482727	0.536864	0.463136	TRUE	33.6596	2.84496	7.42453e-229	0.0561181	up	5.39054e-228	All genes	FALSE	FALSE
NUDT22	NUDT22	-0.000743797	1.11845	0.0989473	0.312346	0.850759	0.149241	TRUE	16.2505	2.90029	4.34092e-116	0.0580488	down	1.75268e-115	All genes	FALSE	TRUE
DNAJC4	DNAJC4	-0.00160278	1.1805	0.0981726	0.395807	0.788889	0.211111	TRUE	17.8472	2.25964	1.94624e-199	0.072408	down	1.26266e-198	All genes	FALSE	FALSE
PRDX5	PRDX5	3.01623	5.17019	1.37754	0.742491	0.477309	0.522691	TRUE	30.2893	1.55794	0	0.380097	up	0	All genes	FALSE	TRUE
ZNHIT2	ZNHIT2	-0.00135037	1.26511	0.0986863	0.440466	0.588945	0.411055	TRUE	35.176	2.35894	0	0.109563	up	0	All genes	FALSE	FALSE
SSSCA1	SSSCA1	-0.00175888	1.25861	0.0983245	0.436941	0.562524	0.437476	TRUE	36.2626	3.89972	4.68396e-132	0.0309253	up	2.12312e-131	All genes	FALSE	TRUE
CST6	CST6	-0.00344772	1.77193	0.0943972	0.831206	0.412255	0.587745	TRUE	29.4438	1.51304	0	0.248541	up	0	All genes	TRUE	FALSE
SF3B2	SF3B2	-0.00429019	1.66432	0.0940494	0.698593	0.249733	0.750267	TRUE	16.3068	1.89586	2.53661e-273	0.0718874	up	2.19249e-272	All genes	FALSE	TRUE
CCS	CCS	0.000240742	1.13495	0.100014	0.316566	0.824854	0.175146	TRUE	16.4185	2.66358	3.49512e-138	0.0590157	down	1.65592e-137	All genes	FALSE	TRUE
POLD4	POLD4	-0.00142675	1.27156	0.0979151	0.598759	0.755754	0.244246	TRUE	21.6696	1.49332	0	0.179645	down	0	All genes	FALSE	FALSE
PITPNM1	PITPNM1	-0.00235674	1.32903	0.0980958	0.517797	0.566247	0.433753	TRUE	34.2173	2.12626	0	0.145089	up	0	All genes	FALSE	FALSE
NUDT8	NUDT8	0.000433017	1.15362	0.100144	0.390105	0.860811	0.139189	TRUE	19.0711	2.23002	9.85678e-201	0.115457	down	6.45114e-200	All genes	FALSE	FALSE
UNC93B1	UNC93B1	-0.00319558	1.50765	0.0957204	0.639428	0.379813	0.620187	TRUE	25.3514	2.01821	0	0.0816971	up	0	All genes	FALSE	FALSE
ALDH3B1	ALDH3B1	-0.00199675	2.11728	0.0956773	0.902393	0.251633	0.748367	TRUE	23.1973	1.07973	0	0.354696	up	0	All genes	FALSE	FALSE
CCND1	CCND1	-0.00241404	1.40639	0.0944277	0.790155	0.573328	0.426672	TRUE	22.8606	2.89509	9.66614e-153	0.0346131	down	5.01289e-152	All genes	FALSE	TRUE
SHANK2	SHANK2	-0.00278605	1.24589	0.0976917	0.434889	0.637379	0.362621	TRUE	37.2905	2.64064	5.34342e-307	0.0996981	up	5.2207e-306	All genes	FALSE	TRUE
LRTOMT	LRTOMT	-0.000363141	1.69373	0.0953571	0.703041	0.389425	0.610575	TRUE	29.3135	1.4436	0	0.351063	up	0	All genes	FALSE	FALSE
PLEKHB1	PLEKHB1	-0.00188559	1.45992	0.0965618	0.586077	0.49541	0.50459	TRUE	32.1386	1.77784	0	0.245004	up	0	All genes	FALSE	FALSE
DNAJB13	DNAJB13	-0.00186593	1.55583	0.0962389	0.622981	0.431458	0.568542	TRUE	30.4414	1.56709	0	0.307329	up	0	All genes	FALSE	FALSE
UCP2	UCP2	-0.00444067	1.95354	0.0928397	0.875005	0.251217	0.748783	TRUE	19.8875	1.47495	0	0.136575	up	0	All genes	TRUE	FALSE
PGM2L1	PGM2L1	-0.00420577	1.34663	0.0967552	0.548031	0.514187	0.485813	TRUE	32.444	2.55958	7.347e-272	0.067417	up	6.29039e-271	All genes	FALSE	FALSE
MAP6	MAP6	-0.00354077	1.37079	0.0963762	0.560336	0.587789	0.412211	TRUE	34.7719	2.1786	0	0.210528	up	0	All genes	FALSE	FALSE
ANKRD42	ANKRD42	-0.0016849	1.23588	0.0996718	0.423165	0.665808	0.334192	TRUE	37.3391	2.57977	0	0.14036	up	0	All genes	FALSE	FALSE
C11orf97	C11orf97	-0.000264484	1.71612	0.0943804	0.754458	0.412092	0.587908	TRUE	30.1514	1.53327	0	0.338557	up	0	All genes	FALSE	FALSE
CEP126	CEP126	-0.00120893	1.80967	0.094628	0.781331	0.328358	0.671642	TRUE	27.0635	1.24917	0	0.373693	up	0	All genes	FALSE	FALSE
C11orf70	C11orf70	0.00103616	2.05185	0.0933073	0.867394	0.316161	0.683839	TRUE	26.8972	1.22069	0	0.435574	up	0	All genes	FALSE	FALSE
MMP7	MMP7	-0.00072979	2.5539	0.0974897	1.81651	0.758314	0.241686	TRUE	23.0206	1.24174	0	0.307693	down	0	All genes	TRUE	TRUE
CARD16	CARD16	-0.000172952	1.08397	0.0995732	0.264608	0.898727	0.101273	TRUE	14.7457	3.75301	6.16645e-67	0.0482799	down	1.6806e-66	All genes	FALSE	TRUE
ACAT1	ACAT1	-0.002018	1.29286	0.0968706	0.499881	0.60968	0.39032	TRUE	37.2993	2.93582	1.70099e-244	0.0674371	up	1.32573e-243	All genes	FALSE	FALSE
EXPH5	EXPH5	-0.00209522	1.34422	0.0959544	0.527192	0.505443	0.494557	TRUE	32.026	3.17142	1.35805e-173	0.0402417	up	7.91193e-173	All genes	FALSE	TRUE
COLCA1	COLCA1	-0.00279707	1.40752	0.0961737	0.584196	0.456974	0.543026	TRUE	28.479	3.37569	4.95874e-136	0.0304494	up	2.30918e-135	All genes	FALSE	TRUE
C11orf88	C11orf88	-0.000757379	2.92076	0.0981078	1.05704	0.239009	0.760991	TRUE	23.6819	1.02491	0	0.656517	up	0	All genes	FALSE	FALSE
PIH1D2	PIH1D2	-0.00197955	1.45171	0.0964417	0.588546	0.510122	0.489878	TRUE	32.7001	1.85598	0	0.25989	up	0	All genes	FALSE	FALSE
BCO2	BCO2	0.00074127	1.26616	0.0988931	0.431593	0.625663	0.374337	TRUE	35.7146	2.32553	0	0.182369	up	0	All genes	FALSE	FALSE
IFT46	IFT46	-0.00196729	1.35177	0.0966515	0.527268	0.551918	0.448082	TRUE	33.6733	2.0056	0	0.178705	up	0	All genes	FALSE	FALSE
CCDC153	CCDC153	-0.00319694	1.68569	0.0967585	0.677806	0.387152	0.612848	TRUE	29.1612	1.42887	0	0.349239	up	0	All genes	FALSE	FALSE
SPA17	SPA17	-0.00332413	2.07953	0.0978918	0.878313	0.300258	0.699742	TRUE	26.1544	1.16755	0	0.433879	up	0	All genes	FALSE	FALSE
VSIG2	VSIG2	-0.00100763	1.26313	0.0980294	0.562555	0.730012	0.269988	TRUE	19.165	1.93744	6.78224e-285	0.08436	down	6.14843e-284	All genes	FALSE	FALSE
TMEM45B	TMEM45B	-0.00175086	1.32666	0.0962341	0.50265	0.587428	0.412572	TRUE	34.934	2.2199	0	0.139638	up	0	All genes	FALSE	FALSE
AKR1C2	AKR1C2	-0.000301922	1.36494	0.0985343	0.799265	0.815924	0.184076	TRUE	18.5473	2.24164	5.22322e-202	0.0912452	down	3.45452e-201	All genes	FALSE	TRUE
AKR1C1	AKR1C1	-0.0022219	1.51674	0.0947422	0.887977	0.599881	0.400119	TRUE	24.3006	1.92957	0	0.0865807	down	0	All genes	FALSE	FALSE
SFTA1P	SFTA1P	-0.0010244	1.26787	0.0980287	0.593346	0.875904	0.124096	TRUE	20.3688	1.96748	6.0707e-255	0.184138	down	4.85656e-254	All genes	FALSE	TRUE
CELF2	CELF2	-0.000605111	1.15962	0.0996707	0.374134	0.855849	0.144151	TRUE	18.0576	2.50931	1.41417e-158	0.0850707	down	7.53975e-158	All genes	FALSE	FALSE
NUDT5	NUDT5	-0.00283831	1.33125	0.0979123	0.50474	0.498815	0.501185	TRUE	31.4826	3.35278	1.82565e-152	0.0347966	up	9.45585e-152	All genes	FALSE	TRUE
SPAG6	SPAG6	0.000123682	2.20352	0.0956304	0.88375	0.283907	0.716093	TRUE	25.844	1.13928	0	0.519947	up	0	All genes	FALSE	FALSE
ARMC3	ARMC3	-0.00310503	1.91813	0.0959118	0.794731	0.324374	0.675626	TRUE	27.5494	1.27773	0	0.465186	up	0	All genes	FALSE	FALSE
ENKUR	ENKUR	-0.000961195	2.08944	0.0952539	0.862262	0.306251	0.693749	TRUE	27.0693	1.24521	0	0.51731	up	0	All genes	TRUE	FALSE
ARMC4	ARMC4	-0.00114966	1.53767	0.0967047	0.621712	0.452209	0.547791	TRUE	31.3613	1.68346	0	0.327731	up	0	All genes	FALSE	FALSE
KIF5B	KIF5B	-0.00491483	1.55935	0.0950876	0.651339	0.331567	0.668433	TRUE	20.3293	2.34741	1.29883e-210	0.0498754	up	8.90002e-210	All genes	FALSE	TRUE
MSMB	MSMB	-0.000398035	2.2616	0.0991495	1.95081	0.88261	0.11739	TRUE	19.5582	2.19603	5.00333e-201	0.151497	down	3.28251e-200	All genes	FALSE	FALSE
FRMPD2	FRMPD2	-0.00322097	1.29657	0.097978	0.474726	0.626439	0.373561	TRUE	35.7774	2.33977	0	0.183096	up	0	All genes	FALSE	FALSE
FAM21A	FAM21A	-0.00221513	1.27624	0.0985228	0.494762	0.623108	0.376892	TRUE	37.2432	2.72071	7.57541e-287	0.0866469	up	6.92125e-286	All genes	FALSE	TRUE
MRLN	MRLN	-0.000362101	1.37644	0.0985283	0.567341	0.627702	0.372298	TRUE	35.8762	2.37762	0	0.190122	up	0	All genes	FALSE	FALSE
ANK3	ANK3	-0.00337077	1.33191	0.0959408	0.512438	0.494235	0.505765	TRUE	31.1834	2.68414	6.5114e-236	0.0562224	up	4.86153e-235	All genes	FALSE	FALSE
C10orf107	C10orf107	-0.00202638	1.58732	0.0964557	0.657659	0.431755	0.568245	TRUE	30.7571	1.60539	0	0.335208	up	0	All genes	FALSE	FALSE
REEP3	REEP3	-0.00195287	1.23092	0.09761	0.482896	0.670619	0.329381	TRUE	15.477	2.73011	4.47533e-136	0.0322572	down	2.08644e-135	All genes	FALSE	TRUE
STOX1	STOX1	-0.00154466	1.44547	0.0968251	0.583613	0.501181	0.498819	TRUE	32.1692	1.7938	0	0.218991	up	0	All genes	FALSE	FALSE
PPA1	PPA1	-0.00351498	1.4267	0.0942976	0.718301	0.464928	0.535072	TRUE	31.5213	2.91109	1.13355e-202	0.0475651	down	7.51527e-202	All genes	FALSE	TRUE
CFAP70	CFAP70	-0.00335529	1.56326	0.0960329	0.648236	0.417732	0.582268	TRUE	29.8832	1.51525	0	0.291437	up	0	All genes	FALSE	FALSE
ANXA7	ANXA7	-0.00410751	1.50618	0.0943945	0.621947	0.339722	0.660278	TRUE	21.3769	2.26711	2.82535e-233	0.0553411	up	2.0828e-232	All genes	FALSE	TRUE
VCL	VCL	-0.00285407	1.13	0.0987222	0.356045	0.866197	0.133803	TRUE	15.1924	3.24136	1.54897e-90	0.050368	down	5.21515e-90	All genes	FALSE	FALSE
COMTD1	COMTD1	-0.00128493	1.19921	0.098774	0.453142	0.837426	0.162574	TRUE	20.8742	1.70573	0	0.188783	down	0	All genes	FALSE	FALSE
SFTPA2	SFTPA2	0.000647694	1.46455	0.0971402	1.15168	0.823116	0.176884	TRUE	16.3484	2.9002	1.75659e-117	0.0546006	down	7.15603e-117	All genes	TRUE	TRUE
SFTPA1	SFTPA1	-0.00159749	1.42395	0.0963878	0.957862	0.811595	0.188405	TRUE	15.0069	3.04633	1.47914e-103	0.0442735	down	5.47176e-103	All genes	TRUE	TRUE
TMEM254	TMEM254	-0.00225127	1.31507	0.0966881	0.492977	0.562856	0.437144	TRUE	34.0649	2.12773	0	0.13901	up	0	All genes	FALSE	FALSE
DYDC2	DYDC2	-0.00194459	1.66045	0.0968905	0.690683	0.418897	0.581103	TRUE	30.3224	1.55296	0	0.338125	up	0	All genes	FALSE	FALSE
ADIRF	ADIRF	-0.000394094	1.6501	0.0966851	0.966816	0.700107	0.299893	TRUE	23.6192	1.23434	0	0.262022	down	0	All genes	FALSE	FALSE
AVPI1	AVPI1	0.000198233	1.14054	0.0986421	0.552326	0.877587	0.122413	TRUE	18.4065	2.54366	4.33285e-151	0.102967	down	2.22164e-150	All genes	FALSE	FALSE
DPCD	DPCD	-0.00254473	1.82163	0.0962163	0.757236	0.327291	0.672709	TRUE	26.3551	1.25019	0	0.311361	up	0	All genes	FALSE	FALSE
C10orf95	C10orf95	-0.00482305	1.57549	0.0956189	0.6443	0.44247	0.55753	TRUE	30.9239	1.62321	0	0.314004	up	0	All genes	FALSE	FALSE
ARL3	ARL3	-0.00420531	1.63034	0.0948526	0.708055	0.344821	0.655179	TRUE	24.919	1.60968	0	0.134862	up	0	All genes	FALSE	FALSE
BORCS7	BORCS7	-0.00393805	1.39138	0.0964945	0.5549	0.449475	0.550525	TRUE	28.3865	2.6665	1.26158e-216	0.0502029	up	8.81485e-216	All genes	FALSE	FALSE
CFAP43	CFAP43	-0.00331678	2.23216	0.0981238	0.853508	0.272344	0.727656	TRUE	25.5931	1.13536	0	0.588259	up	0	All genes	FALSE	FALSE
CFAP58	CFAP58	0.000483131	1.2513	0.098349	0.438944	0.664838	0.335162	TRUE	36.6966	2.57541	0	0.185439	up	0	All genes	FALSE	FALSE
BBIP1	BBIP1	-0.00122187	1.3982	0.0961639	0.574035	0.465352	0.534648	TRUE	30.3166	1.92648	0	0.120837	up	0	All genes	FALSE	FALSE
ACSL5	ACSL5	-0.00119556	1.10505	0.0998832	0.313989	0.888002	0.111998	TRUE	14.9683	3.5924	8.10338e-74	0.048466	down	2.35044e-73	All genes	FALSE	TRUE
PLEKHS1	PLEKHS1	-0.000925508	1.69084	0.0945006	0.755185	0.288839	0.711161	TRUE	17.7493	2.19249	6.23887e-220	0.054021	up	4.40061e-219	All genes	FALSE	TRUE
CASC2	CASC2	-0.00240458	1.25389	0.0970223	0.442005	0.639591	0.360409	TRUE	36.2156	2.4067	0	0.170309	up	0	All genes	FALSE	FALSE
TACC2	TACC2	-0.0018961	1.33942	0.0955396	0.520011	0.508237	0.491763	TRUE	32.0014	2.67806	5.33733e-244	0.0589893	up	4.13618e-243	All genes	TRUE	FALSE
OAT	OAT	-0.00232568	1.26788	0.0977608	0.596056	0.665941	0.334059	TRUE	18.5416	2.20701	5.33401e-223	0.0542725	down	3.79845e-222	All genes	FALSE	FALSE
CTBP2	CTBP2	-0.00299686	1.28089	0.097228	0.485995	0.560717	0.439283	TRUE	35.9812	3.62659	1.96196e-151	0.0359911	up	1.00852e-150	All genes	FALSE	TRUE
FANK1	FANK1	-0.00134986	1.68952	0.0944989	0.699528	0.374643	0.625357	TRUE	28.6845	1.38587	0	0.345645	up	0	All genes	FALSE	FALSE
MGMT	MGMT	-0.00495386	1.51932	0.0936277	0.636757	0.347299	0.652701	TRUE	22.0949	2.2456	1.42318e-243	0.0577223	up	1.10185e-242	All genes	FALSE	FALSE
BNIP3	BNIP3	-0.00360248	1.40135	0.0959104	0.560815	0.459289	0.540711	TRUE	29.4281	2.31761	7.9013e-298	0.0720635	up	7.49569e-297	All genes	FALSE	FALSE
CFAP46	CFAP46	-0.00274588	1.35811	0.0991237	0.534466	0.540252	0.459748	TRUE	33.3894	1.9495	0	0.214766	up	0	All genes	FALSE	FALSE
KNDC1	KNDC1	-0.000326505	1.27479	0.0981264	0.445726	0.639113	0.360887	TRUE	35.9729	2.42544	0	0.19839	up	0	All genes	FALSE	FALSE
TUBGCP2	TUBGCP2	-0.000950144	1.45839	0.0958309	0.590048	0.418566	0.581434	TRUE	28.2982	1.74405	0	0.135118	up	0	All genes	FALSE	FALSE
WNK1	WNK1	-0.00170058	1.3658	0.0962364	0.548329	0.492576	0.507424	TRUE	31.1866	3.22353	2.73521e-163	0.0374193	up	1.50042e-162	All genes	FALSE	FALSE
PTMS	PTMS	-0.0032759	1.29249	0.0976882	0.570253	0.641234	0.358766	TRUE	21.8111	2.02457	3.71161e-294	0.0714889	down	3.48465e-293	All genes	FALSE	FALSE
GPR162	GPR162	-0.00204191	1.53816	0.0961509	0.639662	0.456469	0.543531	TRUE	31.5692	1.71232	0	0.326244	up	0	All genes	FALSE	FALSE
LRRC23	LRRC23	-0.00399009	2.35683	0.0957261	0.915169	0.240238	0.759762	TRUE	23.4853	1.00064	0	0.538873	up	0	All genes	FALSE	FALSE
U47924.27	U47924.27	-0.00114044	1.36558	0.0964037	0.55575	0.529786	0.470214	TRUE	34.1597	3.73652	3.13503e-134	0.0308635	up	1.4459e-133	All genes	FALSE	TRUE
PZP	PZP	-0.00027398	1.27452	0.0990035	0.467425	0.63855	0.36145	TRUE	36.1796	2.40759	0	0.174448	up	0	All genes	FALSE	FALSE
GABARAPL1	GABARAPL1	0.000247733	1.11865	0.0993677	0.313527	0.8726	0.1274	TRUE	16.9045	2.84906	2.36763e-119	0.0708275	down	9.80669e-119	All genes	FALSE	FALSE
MGP	MGP	-0.000672629	1.66218	0.0979415	1.34422	0.850431	0.149569	TRUE	17.8215	2.70382	2.05626e-137	0.0763836	down	9.68042e-137	All genes	FALSE	FALSE
ARHGDIB	ARHGDIB	-0.00105451	1.22079	0.0981233	0.508745	0.782911	0.217089	TRUE	16.009	2.60215	1.87889e-145	0.051283	down	9.2562e-145	All genes	FALSE	FALSE
EPS8	EPS8	-0.00151901	1.42584	0.0954689	0.589358	0.428603	0.571397	TRUE	26.2398	3.14626	4.30373e-145	0.0325463	up	2.11637e-144	All genes	FALSE	TRUE
ETNK1	ETNK1	-0.00480401	1.37661	0.0964209	0.543575	0.461039	0.538961	TRUE	29.6018	2.22327	0	0.0801605	up	0	All genes	FALSE	FALSE
CASC1	CASC1	-0.00213309	1.42416	0.0979474	0.556045	0.507479	0.492521	TRUE	32.5355	1.8307	0	0.255574	up	0	All genes	FALSE	FALSE
FAM60A	FAM60A	-0.0031594	1.36133	0.096782	0.543951	0.459565	0.540435	TRUE	28.5297	3.37631	3.2721e-136	0.0304953	up	1.52723e-135	All genes	FALSE	TRUE
KIF21A	KIF21A	-0.00327488	1.96233	0.0949494	0.884747	0.263211	0.736789	TRUE	22.9809	1.19358	0	0.258916	up	0	All genes	FALSE	FALSE
NELL2	NELL2	-0.00118988	1.56808	0.0973659	0.662605	0.604518	0.395482	TRUE	35.2558	2.24565	0	0.189708	up	0	All genes	FALSE	FALSE
SLC38A2	SLC38A2	-0.000617888	1.29548	0.0974482	0.566857	0.756735	0.243265	TRUE	18.9857	2.03151	2.00127e-256	0.0838907	down	1.60889e-255	All genes	FALSE	FALSE
CCDC65	CCDC65	-0.00395968	1.57604	0.0967099	0.661816	0.458779	0.541221	TRUE	31.7588	1.74654	0	0.339981	up	0	All genes	FALSE	FALSE
FKBP11	FKBP11	4.45152e-05	1.19437	0.098468	0.596669	0.844488	0.155512	TRUE	17.7183	2.51775	1.50889e-155	0.0815869	down	7.91054e-155	All genes	FALSE	TRUE
TUBA1A	TUBA1A	-0.00225881	3.25777	0.0925952	1.39964	0.190805	0.809195	TRUE	20.6046	0.954747	0	0.474011	up	0	All genes	TRUE	FALSE
TUBA1C	TUBA1C	-0.00218219	1.17864	0.0994446	0.555765	0.790768	0.209232	TRUE	15.7914	2.70743	6.83428e-134	0.0500189	down	3.14315e-133	All genes	FALSE	TRUE
AQP5	AQP5	0.00101383	1.90819	0.0980719	1.13537	0.783198	0.216802	TRUE	22.8261	1.1899	0	0.390275	down	0	All genes	FALSE	FALSE
METTL7A	METTL7A	-0.00232945	1.77175	0.0946619	0.750848	0.244253	0.755747	TRUE	19.1983	1.49371	0	0.130316	up	0	All genes	FALSE	TRUE
SMAGP	SMAGP	0.000233908	1.13276	0.0988683	0.372982	0.866275	0.133725	TRUE	15.9404	3.01379	3.37373e-105	0.0593547	down	1.26756e-104	All genes	FALSE	FALSE
KRT7	KRT7	0.000966539	2.1022	0.0940306	1.35332	0.548041	0.451959	TRUE	29.0938	1.5259	0	0.22236	down	0	All genes	FALSE	FALSE
C12orf10	C12orf10	-0.00170026	1.25661	0.0979755	0.441324	0.573515	0.426485	TRUE	36.3272	3.43991	1.64426e-170	0.0414989	up	9.38527e-170	All genes	FALSE	FALSE
CBX5	CBX5	-0.00330902	1.2683	0.0984179	0.462446	0.573796	0.426204	TRUE	36.7163	3.63584	2.1134e-154	0.0371824	up	1.10372e-153	All genes	FALSE	TRUE
DTX3	DTX3	-0.00246711	1.27505	0.0994309	0.450432	0.596767	0.403233	TRUE	35.2816	2.29184	0	0.128116	up	0	All genes	FALSE	FALSE
RP11-620J15.3	RP11-620J15.3	-0.0015163	1.84665	0.0965345	0.765366	0.342321	0.657679	TRUE	27.7649	1.29585	0	0.396659	up	0	All genes	FALSE	FALSE
MDM1	MDM1	-0.0013498	1.24489	0.0985504	0.428095	0.644058	0.355942	TRUE	36.5075	2.43857	0	0.153611	up	0	All genes	FALSE	FALSE
MDM2	MDM2	-0.00236294	1.29932	0.0972031	0.49645	0.557352	0.442648	TRUE	35.4748	3.40005	1.2777e-169	0.0407105	up	7.25242e-169	All genes	FALSE	FALSE
CCT2	CCT2	-0.00438233	1.48134	0.0954524	0.621101	0.377127	0.622873	TRUE	23.0167	2.63913	7.63961e-184	0.0422143	up	4.64288e-183	All genes	FALSE	FALSE
ATXN7L3B	ATXN7L3B	-0.00305991	1.30119	0.0984304	0.485006	0.535446	0.464554	TRUE	33.4483	2.71344	3.37152e-250	0.0621644	up	2.6633e-249	All genes	FALSE	FALSE
CAPS2	CAPS2	-0.000651879	1.26444	0.0983643	0.442743	0.618595	0.381405	TRUE	35.7217	2.3053	0	0.156597	up	0	All genes	FALSE	FALSE
TSPAN19	TSPAN19	-0.00482068	2.11298	0.0962103	0.875086	0.318621	0.681379	TRUE	27.3106	1.25707	0	0.474783	up	0	All genes	TRUE	FALSE
LRRIQ1	LRRIQ1	-0.00469623	2.58947	0.0970149	0.928094	0.234546	0.765454	TRUE	23.5127	1.02978	0	0.685446	up	0	All genes	TRUE	FALSE
CEP290	CEP290	-0.00268263	1.44466	0.0976253	0.609211	0.478912	0.521088	TRUE	31.0745	1.837	0	0.150752	up	0	All genes	FALSE	FALSE
NUDT4	NUDT4	-0.00298218	1.5274	0.0937147	0.668049	0.390846	0.609154	TRUE	25.8533	2.11941	0	0.0748061	up	0	All genes	FALSE	FALSE
MRPL42	MRPL42	-0.00276092	1.30378	0.0971683	0.479733	0.511073	0.488927	TRUE	32.2909	3.30934	8.03012e-161	0.0370782	up	4.35525e-160	All genes	FALSE	TRUE
CEP83	CEP83	-0.00295623	1.33766	0.0962147	0.513103	0.554067	0.445933	TRUE	33.7147	2.0301	0	0.164633	up	0	All genes	FALSE	FALSE
LTA4H	LTA4H	-0.00161398	1.20542	0.0967873	0.464614	0.741476	0.258524	TRUE	17.3328	2.24355	1.55619e-203	0.0605047	down	1.03594e-202	All genes	FALSE	FALSE
CFAP54	CFAP54	-0.00392852	1.49288	0.0977453	0.594381	0.464907	0.535093	TRUE	31.3631	1.67701	0	0.278481	up	0	All genes	FALSE	FALSE
TXNRD1	TXNRD1	-0.00273117	1.27452	0.0973189	0.494704	0.59102	0.40898	TRUE	36.3998	2.87067	6.91204e-248	0.0663631	up	5.41819e-247	All genes	FALSE	FALSE
APPL2	APPL2	-0.0031042	1.41538	0.0976169	0.58558	0.504216	0.495784	TRUE	32.05	1.87963	0	0.160512	up	0	All genes	FALSE	FALSE
C12orf75	C12orf75	-0.00189962	2.5838	0.0952116	1.04757	0.248653	0.751347	TRUE	23.8925	1.02116	0	0.519418	up	0	All genes	TRUE	FALSE
CKAP4	CKAP4	-0.000760069	1.14602	0.097808	0.376021	0.85212	0.14788	TRUE	18.3472	2.40789	9.12604e-173	0.0909778	down	5.2979e-172	All genes	FALSE	FALSE
GLTP	GLTP	-0.00163138	1.18945	0.0984747	0.443061	0.762289	0.237711	TRUE	17.4158	2.28929	6.18417e-195	0.0629527	down	3.93092e-194	All genes	FALSE	FALSE
IFT81	IFT81	-0.0044591	1.47315	0.0963306	0.613186	0.437046	0.562954	TRUE	29.6924	1.64462	0	0.184011	up	0	All genes	FALSE	FALSE
ATP2A2	ATP2A2	-0.0045369	1.82132	0.0941141	0.806943	0.244563	0.755437	TRUE	19.1561	1.51804	0	0.125457	up	0	All genes	FALSE	FALSE
TCTN1	TCTN1	-0.00438759	1.84278	0.0951342	0.782162	0.296834	0.703166	TRUE	25.0337	1.18809	0	0.312023	up	0	All genes	FALSE	FALSE
ATXN2	ATXN2	-0.00199696	1.30172	0.0984023	0.49536	0.530909	0.469091	TRUE	33.1457	2.54503	3.20032e-282	0.0715322	up	2.87255e-281	All genes	FALSE	FALSE
ALDH2	ALDH2	-0.000268847	1.51246	0.0937788	0.789149	0.450373	0.549627	TRUE	32.3043	2.77371	1.09335e-229	0.0552429	down	7.99503e-229	All genes	FALSE	TRUE
CFAP73	CFAP73	-0.00267259	1.88116	0.0949702	0.793641	0.322305	0.677695	TRUE	27.5022	1.27276	0	0.461965	up	0	All genes	FALSE	FALSE
IQCD	IQCD	-0.00124193	1.52844	0.0976318	0.624745	0.467223	0.532777	TRUE	31.5953	1.70698	0	0.293843	up	0	All genes	FALSE	FALSE
SUDS3	SUDS3	-0.00209506	1.31364	0.0961328	0.50292	0.525385	0.474615	TRUE	33.1735	3.0665	3.17649e-193	0.0458518	up	2.01129e-192	All genes	FALSE	FALSE
CCDC60	CCDC60	-0.00096531	1.3022	0.0963484	0.482024	0.578674	0.421326	TRUE	34.6599	2.21193	0	0.131853	up	0	All genes	FALSE	FALSE
PXN	PXN	-0.00132406	1.24932	0.0997641	0.447928	0.579551	0.420449	TRUE	36.3086	3.18231	1.01208e-199	0.0501465	up	6.58173e-199	All genes	FALSE	FALSE
DYNLL1	DYNLL1	1.88913	4.68371	1.19842	0.902563	0.354733	0.645267	TRUE	26.9881	1.22791	0	0.472774	up	0	All genes	TRUE	FALSE
NRAV	NRAV	-0.00300881	1.25274	0.0984178	0.434354	0.619903	0.380097	TRUE	35.7285	2.30671	0	0.160997	up	0	All genes	FALSE	FALSE
UNC119B	UNC119B	-0.00342219	1.28883	0.0978044	0.488452	0.610911	0.389089	TRUE	35.5129	2.2722	0	0.165326	up	0	All genes	FALSE	FALSE
ANAPC5	ANAPC5	-0.00120412	1.35828	0.0975406	0.523778	0.444878	0.555122	TRUE	28.0317	2.66439	2.70903e-214	0.0495571	up	1.87838e-213	All genes	FALSE	FALSE
MORN3	MORN3	-0.00132783	1.31327	0.0986538	0.490264	0.594514	0.405486	TRUE	34.8785	2.18528	0	0.199099	up	0	All genes	FALSE	FALSE
WDR66	WDR66	-0.00420166	1.64534	0.0941085	0.702552	0.397736	0.602264	TRUE	29.5582	1.46983	0	0.337148	up	0	All genes	FALSE	FALSE
LRRC43	LRRC43	-0.00040233	1.2724	0.0976727	0.45373	0.615576	0.384424	TRUE	35.3867	2.29587	0	0.203052	up	0	All genes	FALSE	FALSE
CLIP1	CLIP1	-0.00106398	1.36815	0.097303	0.547958	0.484035	0.515965	TRUE	30.6585	2.77788	4.18414e-216	0.0507174	up	2.91853e-215	All genes	FALSE	FALSE
DNAH10	DNAH10	-0.00387381	2.01145	0.0965415	0.810655	0.308795	0.691205	TRUE	27.2092	1.26131	0	0.523046	up	0	All genes	FALSE	FALSE
STX2	STX2	-0.000982911	1.23454	0.0988309	0.423918	0.671221	0.328779	TRUE	37.188	2.59126	0	0.15822	up	0	All genes	FALSE	FALSE
EP400	EP400	-0.00154301	1.28183	0.0968501	0.46648	0.60698	0.39302	TRUE	36.2039	2.54575	0	0.0956435	up	0	All genes	FALSE	FALSE
IFT88	IFT88	-0.00333077	1.51994	0.096171	0.631837	0.430442	0.569558	TRUE	30.0595	1.55287	0	0.258178	up	0	All genes	FALSE	FALSE
TNFRSF19	TNFRSF19	-0.00178798	1.43542	0.0979029	0.598003	0.47454	0.52546	TRUE	30.8413	1.84384	0	0.144763	up	0	All genes	FALSE	FALSE
MIPEP	MIPEP	-0.000849516	1.22787	0.0980706	0.408784	0.646669	0.353331	TRUE	37.1675	2.56091	0	0.117311	up	0	All genes	FALSE	FALSE
UBL3	UBL3	-0.00387173	1.45614	0.0948783	0.598605	0.408945	0.591055	TRUE	26.9579	2.07442	0	0.0823616	up	0	All genes	FALSE	TRUE
HSPH1	HSPH1	-0.00311276	2.14386	0.0932798	0.965609	0.224833	0.775167	TRUE	21.3278	1.11353	0	0.28651	up	0	All genes	FALSE	FALSE
NBEA	NBEA	0.00106349	1.34587	0.096543	0.530628	0.565696	0.434304	TRUE	34.3156	2.20683	0	0.124051	up	0	All genes	FALSE	FALSE
SPG20	SPG20	-0.002852	1.25595	0.0995239	0.445997	0.588812	0.411188	TRUE	35.9644	2.75749	2.70918e-265	0.0716921	up	2.25342e-264	All genes	FALSE	FALSE
CCNA1	CCNA1	-0.00285204	1.45479	0.0966226	0.642279	0.594119	0.405881	TRUE	34.9875	2.25326	0	0.226511	up	0	All genes	FALSE	FALSE
STOML3	STOML3	-0.00190475	1.68385	0.095074	0.716262	0.432957	0.567043	TRUE	30.6705	1.59282	0	0.319383	up	0	All genes	FALSE	FALSE
MRPS31	MRPS31	-0.00144014	2.36359	0.0929903	1.0211	0.237969	0.762031	TRUE	22.7432	1.03882	0	0.388436	up	0	All genes	TRUE	FALSE
RGCC	RGCC	-0.00261377	1.61342	0.0947737	0.752747	0.393314	0.606686	TRUE	26.3616	2.06355	0	0.0811382	up	0	All genes	FALSE	TRUE
DGKH	DGKH	-0.000847702	1.28203	0.0976272	0.47512	0.587517	0.412483	TRUE	36.216	2.89846	2.44112e-241	0.0636105	up	1.86695e-240	All genes	FALSE	FALSE
FAM216B	FAM216B	-0.0019153	2.34139	0.0946488	0.93761	0.274769	0.725231	TRUE	25.8397	1.16009	0	0.594807	up	0	All genes	TRUE	FALSE
KPNA3	KPNA3	-0.0029742	1.2916	0.0974568	0.46845	0.592181	0.407819	TRUE	35.782	2.58574	1.18707e-301	0.0856805	up	1.1407e-300	All genes	FALSE	FALSE
KCNRG	KCNRG	-0.00202653	1.25937	0.0986771	0.458064	0.662115	0.337885	TRUE	36.6707	2.56299	0	0.184383	up	0	All genes	FALSE	FALSE
NEK5	NEK5	-0.00109025	1.62722	0.0960838	0.695432	0.405165	0.594835	TRUE	29.8221	1.49767	0	0.331315	up	0	All genes	FALSE	FALSE
SUGT1	SUGT1	-0.00532729	1.33782	0.096694	0.509593	0.492695	0.507305	TRUE	31.0537	2.82915	3.39783e-211	0.0495968	up	2.33418e-210	All genes	FALSE	FALSE
KCTD12	KCTD12	-0.00217553	1.71354	0.0944962	0.760064	0.405727	0.594273	TRUE	29.5794	1.48253	0	0.301176	up	0	All genes	FALSE	FALSE
NDFIP2	NDFIP2	-0.00316067	1.34813	0.0971143	0.51865	0.482733	0.517267	TRUE	30.3668	3.16124	3.97147e-165	0.0377062	up	2.20075e-164	All genes	FALSE	FALSE
FARP1	FARP1	-0.00223341	1.29229	0.097512	0.491942	0.537573	0.462427	TRUE	34.1757	3.29778	1.20556e-172	0.0408454	up	6.98864e-172	All genes	FALSE	TRUE
FGF14	FGF14	-0.00436618	1.47399	0.0951141	0.623746	0.531168	0.468832	TRUE	33.3455	1.95683	0	0.253795	up	0	All genes	FALSE	FALSE
CDC16	CDC16	-0.000702167	1.38049	0.0973295	0.540356	0.500868	0.499132	TRUE	31.644	2.1187	0	0.103756	up	0	All genes	FALSE	FALSE
CCNB1IP1	CCNB1IP1	0.000590054	1.08488	0.100371	0.280277	0.888355	0.111645	TRUE	14.9422	3.50247	1.36625e-76	0.0505085	down	4.07134e-76	All genes	FALSE	TRUE
RNASE1	RNASE1	-0.00134394	2.28508	0.0960061	1.63405	0.698814	0.301186	TRUE	23.3978	1.26302	0	0.240184	down	0	All genes	FALSE	FALSE
RBM23	RBM23	-0.00104858	1.26675	0.0988132	0.449539	0.560901	0.439099	TRUE	35.0903	3.05832	1.23137e-207	0.0512828	up	8.31911e-207	All genes	FALSE	FALSE
PSMB5	PSMB5	-0.00365992	1.64122	0.0948622	0.673264	0.270716	0.729284	TRUE	14.5432	2.33964	1.72799e-176	0.0440374	up	1.01761e-175	All genes	FALSE	TRUE
REC8	REC8	-0.0047987	1.30251	0.0966099	0.489966	0.568264	0.431736	TRUE	34.4558	2.28591	0	0.110581	up	0	All genes	FALSE	FALSE
HECTD1	HECTD1	-0.00347514	1.52881	0.0935467	0.637987	0.338305	0.661695	TRUE	22.111	2.08323	1.55144e-281	0.0678447	up	1.38645e-280	All genes	FALSE	FALSE
SPTSSA	SPTSSA	-0.00019933	1.27898	0.0966349	0.607757	0.732884	0.267116	TRUE	20.1837	1.7659	0	0.107867	down	0	All genes	TRUE	FALSE
FAM179B	FAM179B	-0.000151541	1.28787	0.0989374	0.471288	0.579142	0.420858	TRUE	34.7618	2.27287	0	0.118812	up	0	All genes	FALSE	FALSE
DNAAF2	DNAAF2	-0.00106492	1.25799	0.0989546	0.446203	0.611559	0.388441	TRUE	37.3321	2.95919	9.31304e-241	0.0660551	up	7.09598e-240	All genes	FALSE	FALSE
JKAMP	JKAMP	-0.00185563	1.30095	0.0978885	0.465985	0.519451	0.480549	TRUE	32.4693	2.61645	3.60171e-260	0.0640148	up	2.94187e-259	All genes	FALSE	FALSE
PCNXL4	PCNXL4	-0.00195921	1.2808	0.0970369	0.469998	0.581643	0.418357	TRUE	34.9836	2.35121	0	0.107633	up	0	All genes	FALSE	FALSE
MNAT1	MNAT1	-0.00284726	1.3062	0.0970539	0.48075	0.530661	0.469339	TRUE	33.4467	3.09487	1.86842e-191	0.0455233	up	1.17394e-190	All genes	FALSE	FALSE
CHURC1	CHURC1	-0.00395077	1.55358	0.0937374	0.645677	0.31457	0.68543	TRUE	17.0271	2.63442	2.70214e-152	0.0359716	up	1.3969e-151	All genes	FALSE	FALSE
ATP6V1D	ATP6V1D	-0.00533752	1.58357	0.0940572	0.674618	0.361323	0.638677	TRUE	25.4998	1.682	0	0.124999	up	0	All genes	FALSE	FALSE
DNAL1	DNAL1	-0.00247442	1.54931	0.0953983	0.659932	0.416918	0.583082	TRUE	29.6352	1.5148	0	0.26103	up	0	All genes	FALSE	FALSE
PNMA1	PNMA1	-0.000119117	1.28616	0.0988309	0.476449	0.635248	0.364752	TRUE	36.2446	2.39515	0	0.158578	up	0	All genes	FALSE	FALSE
BBOF1	BBOF1	-0.0046809	1.76011	0.0951607	0.756694	0.351982	0.648018	TRUE	27.9484	1.31976	0	0.360762	up	0	All genes	FALSE	FALSE
ISCA2	ISCA2	-0.002932	1.39194	0.0954799	0.561145	0.437963	0.562037	TRUE	28.2123	2.29606	3.11102e-290	0.0693714	up	2.86804e-289	All genes	FALSE	TRUE
ACYP1	ACYP1	-0.000110507	1.60836	0.0937652	0.688715	0.383662	0.616338	TRUE	27.9808	1.45001	0	0.227201	up	0	All genes	FALSE	FALSE
IFT43	IFT43	-0.00266647	1.77933	0.0951369	0.751008	0.282069	0.717931	TRUE	23.5297	1.24528	0	0.238706	up	0	All genes	FALSE	FALSE
CIPC	CIPC	-0.00090414	1.26001	0.0972398	0.450435	0.638722	0.361278	TRUE	37.2994	2.63007	0	0.102063	up	0	All genes	FALSE	TRUE
AHSA1	AHSA1	-0.00468394	1.56784	0.0955231	0.655827	0.377602	0.622398	TRUE	26.6832	1.61196	0	0.148457	up	0	All genes	FALSE	FALSE
RP11-356K23.1	RP11-356K23.1	-0.0023765	2.35128	0.0937549	1.10312	0.292303	0.707697	TRUE	26.2733	1.17027	0	0.473752	up	0	All genes	FALSE	FALSE
CALM1	CALM1	2.1225	4.51549	1.18494	0.993412	0.355054	0.644946	TRUE	26.8277	1.2188	0	0.415847	up	0	All genes	TRUE	TRUE
CCDC88C	CCDC88C	-0.0020196	1.4235	0.0962703	0.582792	0.458402	0.541598	TRUE	30.2157	1.79027	0	0.148243	up	0	All genes	FALSE	FALSE
C14orf142	C14orf142	-0.00215411	1.98268	0.0943555	0.859295	0.308294	0.691706	TRUE	25.8927	1.19333	0	0.349544	up	0	All genes	FALSE	FALSE
IFI27	IFI27	-0.00366158	1.93144	0.0937184	1.03376	0.415602	0.584398	TRUE	27.8481	2.11067	0	0.0825911	up	0	All genes	FALSE	FALSE
CLMN	CLMN	-0.00543326	1.53642	0.0975303	0.65545	0.396159	0.603841	TRUE	27.8238	1.59218	0	0.166917	up	0	All genes	FALSE	FALSE
AK7	AK7	-0.00241257	1.51891	0.0951019	0.619056	0.458499	0.541501	TRUE	31.409	1.68424	0	0.305738	up	0	All genes	FALSE	FALSE
PAPOLA	PAPOLA	-0.00440667	1.65158	0.0942396	0.701661	0.263605	0.736395	TRUE	17.2405	1.93633	8.96246e-272	0.0699028	up	7.66548e-271	All genes	FALSE	FALSE
DEGS2	DEGS2	-0.00252635	1.65692	0.0961931	0.712046	0.369428	0.630572	TRUE	26.3965	1.59114	0	0.150689	up	0	All genes	FALSE	FALSE
PPP2R5C	PPP2R5C	-0.00228702	1.29072	0.0975292	0.480564	0.564257	0.435743	TRUE	35.1303	2.91625	3.32201e-229	0.0578635	up	2.42269e-228	All genes	FALSE	TRUE
MOK	MOK	-0.00233162	1.46233	0.0967878	0.5932	0.452171	0.547829	TRUE	30.6713	1.62203	0	0.241829	up	0	All genes	FALSE	FALSE
TNFAIP2	TNFAIP2	-0.000367884	1.22055	0.0982928	0.624872	0.855727	0.144273	TRUE	15.0663	3.18199	5.49286e-93	0.0509121	down	1.87566e-92	All genes	FALSE	TRUE
CKB	CKB	-0.00589465	2.48856	0.0945793	1.03201	0.16785	0.83215	TRUE	18.3065	1.04586	0	0.316365	up	0	All genes	FALSE	FALSE
NUDT14	NUDT14	-0.00236956	1.4276	0.0947356	0.58383	0.420084	0.579916	TRUE	26.9603	2.37725	7.94902e-259	0.0608	up	6.44123e-258	All genes	FALSE	FALSE
CRIP1	CRIP1	1.741	4.42219	1.17764	1.01734	0.316438	0.683562	TRUE	21.035	1.42814	0	0.152321	up	0	All genes	TRUE	FALSE
SPINT1	SPINT1	-0.00330643	1.39603	0.0959134	0.73118	0.54712	0.45288	TRUE	27.1839	2.06749	0	0.0838713	down	0	All genes	FALSE	FALSE
RHOV	RHOV	-8.85289e-05	1.39574	0.0984144	0.715922	0.848724	0.151276	TRUE	21.3908	1.43145	0	0.329215	down	0	All genes	FALSE	FALSE
ZNF106	ZNF106	-0.000744648	1.43186	0.0962794	0.620238	0.46433	0.53567	TRUE	29.9806	2.26382	0	0.0784305	up	0	All genes	FALSE	FALSE
CCNDBP1	CCNDBP1	-0.00151541	1.42687	0.0974045	0.563237	0.428364	0.571636	TRUE	27.6986	2.20455	0	0.0742522	up	0	All genes	FALSE	FALSE
TP53BP1	TP53BP1	-0.00246914	1.30656	0.096844	0.484734	0.555608	0.444392	TRUE	33.8592	2.2015	0	0.116463	up	0	All genes	FALSE	FALSE
MAP1A	MAP1A	-0.00286835	1.47929	0.0970064	0.602385	0.498359	0.501641	TRUE	32.5296	1.84016	0	0.285243	up	0	All genes	FALSE	FALSE
SECISBP2L	SECISBP2L	-0.00367835	1.45046	0.0945202	0.606017	0.417987	0.582013	TRUE	27.3346	2.1548	0	0.0768826	up	0	All genes	FALSE	FALSE
SLC27A2	SLC27A2	-0.00325608	1.46608	0.0972105	0.614029	0.493268	0.506732	TRUE	31.6149	1.86915	0	0.152737	up	0	All genes	FALSE	FALSE
GABPB1-AS1	GABPB1-AS1	-0.00257846	1.26944	0.0976905	0.453954	0.582634	0.417366	TRUE	37.2426	3.65229	1.03595e-155	0.0378618	up	5.43807e-155	All genes	FALSE	FALSE
USP8	USP8	-0.00272527	1.28526	0.0987554	0.469705	0.544501	0.455499	TRUE	34.3667	3.19909	8.61751e-185	0.0442378	up	5.24891e-184	All genes	FALSE	FALSE
C15orf65	C15orf65	-0.00228909	1.32073	0.0970996	0.501441	0.582022	0.417978	TRUE	34.7705	2.21022	0	0.136298	up	0	All genes	FALSE	FALSE
DYX1C1	DYX1C1	-0.0033189	1.72175	0.0942724	0.750367	0.37089	0.62911	TRUE	28.6158	1.38015	0	0.34487	up	0	All genes	FALSE	FALSE
TEX9	TEX9	-0.00514619	1.51485	0.0945456	0.622932	0.411107	0.588893	TRUE	28.5164	1.58727	0	0.179752	up	0	All genes	FALSE	FALSE
MNS1	MNS1	-0.00239511	1.81474	0.0965229	0.793952	0.370201	0.629799	TRUE	29.0793	1.42071	0	0.397102	up	0	All genes	FALSE	FALSE
MYO1E	MYO1E	-0.00326377	1.27118	0.0975441	0.480641	0.612476	0.387524	TRUE	36.6523	2.63066	4.2571e-301	0.0902427	up	4.07644e-300	All genes	FALSE	FALSE
VPS13C	VPS13C	-0.00430492	1.38401	0.0962677	0.542114	0.428964	0.571036	TRUE	26.6871	2.77033	2.48142e-189	0.0432489	up	1.54248e-188	All genes	FALSE	TRUE
CALML4	CALML4	-0.0026747	1.66339	0.0962884	0.705722	0.410879	0.589121	TRUE	29.6661	1.49253	0	0.296814	up	0	All genes	FALSE	FALSE
LRRC49	LRRC49	-0.00098809	1.341	0.0990474	0.504312	0.58102	0.41898	TRUE	34.495	2.11642	0	0.197499	up	0	All genes	FALSE	FALSE
BBS4	BBS4	-0.00320795	1.22193	0.0990865	0.409471	0.658381	0.341619	TRUE	37.4975	2.60342	0	0.121148	up	0	All genes	FALSE	FALSE
RP11-60L3.1	RP11-60L3.1	-0.00131927	1.3713	0.0969732	0.548579	0.618194	0.381806	TRUE	35.6354	2.31066	0	0.183071	up	0	All genes	FALSE	FALSE
CCDC33	CCDC33	-0.00195671	1.24274	0.0988475	0.433941	0.68158	0.31842	TRUE	37.2266	2.67374	0	0.173708	up	0	All genes	FALSE	FALSE
DNAJA4	DNAJA4	-0.00143718	1.92712	0.0931041	0.861878	0.282712	0.717288	TRUE	24.4229	1.17192	0	0.305457	up	0	All genes	FALSE	FALSE
TMED3	TMED3	-0.00191598	1.24331	0.0973983	0.522885	0.653982	0.346018	TRUE	20.1154	2.17623	1.67092e-241	0.058253	down	1.28031e-240	All genes	FALSE	TRUE
ZFAND6	ZFAND6	-0.00239978	1.40912	0.0961702	0.553849	0.430736	0.569264	TRUE	26.8925	2.73099	3.8231e-196	0.0449333	up	2.43961e-195	All genes	FALSE	FALSE
CFAP161	CFAP161	-0.00282316	1.31155	0.0978775	0.484552	0.61485	0.38515	TRUE	35.3454	2.31929	0	0.217367	up	0	All genes	FALSE	FALSE
SAXO2	SAXO2	-0.002116	2.10781	0.0956297	0.86306	0.283457	0.716543	TRUE	25.9367	1.14723	0	0.526044	up	0	All genes	FALSE	FALSE
HOMER2	HOMER2	-0.000829408	1.08803	0.0998157	0.26147	0.896543	0.103457	TRUE	15.8993	3.43485	1.97063e-81	0.0582533	down	6.11553e-81	All genes	FALSE	FALSE
ABHD2	ABHD2	-0.00226812	1.77583	0.0920271	0.798165	0.271279	0.728721	TRUE	20.4208	1.59697	0	0.115707	up	0	All genes	FALSE	FALSE
WDR93	WDR93	0.000776367	1.25717	0.0993572	0.43139	0.63227	0.36773	TRUE	35.8443	2.37228	0	0.190936	up	0	All genes	FALSE	FALSE
CIB1	CIB1	1.92786	3.93521	1.12959	0.79668	0.435976	0.564024	TRUE	29.5011	1.46373	0	0.339712	up	0	All genes	TRUE	FALSE
NGRN	NGRN	-0.00317155	1.65289	0.0949291	0.69842	0.3189	0.6811	TRUE	22.2545	1.79399	0	0.0945065	up	0	All genes	FALSE	FALSE
NHLRC4	NHLRC4	-0.00290562	1.2854	0.0977564	0.445243	0.615346	0.384654	TRUE	35.3636	2.2925	0	0.203909	up	0	All genes	FALSE	FALSE
WDR90	WDR90	-0.00274399	1.28532	0.0979793	0.481587	0.608326	0.391674	TRUE	35.5068	2.27458	0	0.152386	up	0	All genes	FALSE	FALSE
METRN	METRN	-0.00327547	1.49704	0.0957807	0.681185	0.480476	0.519524	TRUE	31.4424	1.79453	0	0.174164	up	0	All genes	FALSE	FALSE
FAM173A	FAM173A	0.00113893	1.13455	0.100259	0.334776	0.858752	0.141248	TRUE	18.9205	2.28968	1.04254e-191	0.106817	down	6.56047e-191	All genes	FALSE	FALSE
CCDC78	CCDC78	-0.00146145	2.73895	0.0988982	0.982988	0.242703	0.757297	TRUE	24.1228	1.08252	0	0.705678	up	0	All genes	FALSE	FALSE
HAGHL	HAGHL	-0.0026127	1.34418	0.0962573	0.520141	0.572146	0.427854	TRUE	34.2999	2.08585	0	0.180663	up	0	All genes	FALSE	FALSE
BAIAP3	BAIAP3	-0.00213008	1.43098	0.0972525	0.584975	0.544735	0.455265	TRUE	33.6674	2.00894	0	0.247715	up	0	All genes	FALSE	FALSE
IFT140	IFT140	-0.00419337	1.33642	0.0966047	0.50261	0.565684	0.434316	TRUE	34.0588	2.04965	0	0.186614	up	0	All genes	FALSE	FALSE
HN1L	HN1L	-0.00449538	1.54669	0.0931121	0.682418	0.359531	0.640469	TRUE	25.0874	1.79165	0	0.105758	up	0	All genes	FALSE	FALSE
HAGH	HAGH	-0.0036037	1.40811	0.0968511	0.558072	0.442211	0.557789	TRUE	28.5892	2.16852	0	0.0805288	up	0	All genes	FALSE	FALSE
SNHG19	SNHG19	-0.000534405	1.10485	0.0991785	0.293605	0.884282	0.115718	TRUE	16.6439	3.04373	3.21455e-104	0.0676833	down	1.19674e-103	All genes	FALSE	FALSE
ZG16B	ZG16B	0.00131087	1.38249	0.0985385	0.82479	0.869811	0.130189	TRUE	20.3199	1.90739	6.35228e-268	0.191974	down	5.31613e-267	All genes	FALSE	FALSE
CLUAP1	CLUAP1	-0.00095256	1.58842	0.0943525	0.672192	0.371154	0.628846	TRUE	27.1895	1.45736	0	0.204039	up	0	All genes	FALSE	FALSE
C16orf71	C16orf71	-0.00223364	1.2985	0.0989669	0.459908	0.609	0.391	TRUE	35.1859	2.26772	0	0.211256	up	0	All genes	FALSE	FALSE
C16orf89	C16orf89	-0.00517495	1.43956	0.0963455	0.802432	0.680909	0.319091	TRUE	18.014	2.05754	1.78543e-249	0.0626826	down	1.40767e-248	All genes	FALSE	FALSE
ATF7IP2	ATF7IP2	-0.00242102	1.60092	0.0961006	0.738021	0.49768	0.50232	TRUE	32.0696	1.82716	0	0.184158	up	0	All genes	FALSE	FALSE
PLA2G10	PLA2G10	-0.00273669	1.47777	0.0957382	0.639425	0.45587	0.54413	TRUE	29.4204	2.31401	1.11599e-298	0.0722944	up	1.0624e-297	All genes	FALSE	FALSE
CCP110	CCP110	-0.00152972	1.46406	0.0950423	0.615807	0.45281	0.54719	TRUE	30.3539	1.67663	0	0.189361	up	0	All genes	FALSE	FALSE
IQCK	IQCK	-0.00269869	1.65085	0.0963788	0.68923	0.344459	0.655541	TRUE	26.8375	1.31246	0	0.277783	up	0	All genes	FALSE	FALSE
DNAH3	DNAH3	-0.00302372	1.65227	0.097238	0.693697	0.412822	0.587178	TRUE	30.4359	1.57422	0	0.372624	up	0	All genes	FALSE	FALSE
TMEM159	TMEM159	-0.00134852	1.13482	0.101223	0.34279	0.82435	0.17565	TRUE	15.8903	2.78558	2.45614e-125	0.053224	down	1.06429e-124	All genes	FALSE	TRUE
CRYM	CRYM	-7.6656e-05	1.22951	0.0987848	0.542446	0.853211	0.146789	TRUE	19.4974	2.15246	2.62176e-218	0.123687	down	1.83816e-217	All genes	FALSE	FALSE
VWA3A	VWA3A	-0.00385841	1.54589	0.0969867	0.631737	0.442681	0.557319	TRUE	30.8606	1.61521	0	0.304501	up	0	All genes	FALSE	FALSE
SCNN1B	SCNN1B	-0.00193238	1.40011	0.0987405	0.6859	0.858511	0.141489	TRUE	21.2348	1.33836	0	0.466888	down	0	All genes	FALSE	FALSE
ERN2	ERN2	-0.00211157	1.22117	0.099211	0.45624	0.810091	0.189909	TRUE	19.7987	1.95138	2.42218e-275	0.117099	down	2.10696e-274	All genes	FALSE	FALSE
NSMCE1	NSMCE1	-0.00175072	1.34413	0.095977	0.502073	0.452659	0.547341	TRUE	27.8194	3.18212	1.45803e-149	0.0336434	up	7.42467e-149	All genes	FALSE	FALSE
DOC2A	DOC2A	-0.00301314	1.39928	0.09699	0.587531	0.565754	0.434246	TRUE	34.1846	2.06708	0	0.199656	up	0	All genes	FALSE	FALSE
CCDC189	CCDC189	-0.00345736	1.39441	0.0974626	0.545735	0.494098	0.505902	TRUE	32.0343	1.76762	0	0.237389	up	0	All genes	FALSE	FALSE
PRSS8	PRSS8	0.000896013	1.27516	0.100166	0.536058	0.891253	0.108747	TRUE	20.4139	1.51964	0	0.449198	down	0	All genes	FALSE	TRUE
VPS35	VPS35	-0.00568772	1.74109	0.0947478	0.746811	0.25228	0.74772	TRUE	19.2258	1.56485	0	0.117301	up	0	All genes	FALSE	FALSE
LINC01571	LINC01571	-0.00274998	1.3737	0.0984603	0.555885	0.629734	0.370266	TRUE	35.8498	2.40078	0	0.20068	up	0	All genes	FALSE	FALSE
RP11-295M3.4	RP11-295M3.4	-0.00232939	2.4084	0.0954048	1.03707	0.253717	0.746283	TRUE	24.0368	1.04163	0	0.465329	up	0	All genes	FALSE	FALSE
RPGRIP1L	RPGRIP1L	-0.00184635	1.28105	0.0985645	0.466464	0.603654	0.396346	TRUE	35.2262	2.22653	0	0.16895	up	0	All genes	FALSE	FALSE
FTO	FTO	-0.00247816	1.72163	0.0941179	0.901287	0.437644	0.562356	TRUE	29.297	1.99328	0	0.102646	up	0	All genes	FALSE	FALSE
MT1X	MT1X	-0.00113673	1.66328	0.0940878	1.22054	0.553757	0.446243	TRUE	26.2094	2.06302	0	0.0806481	down	0	All genes	TRUE	TRUE
CX3CL1	CX3CL1	-0.000302493	1.20884	0.0991092	0.470673	0.87807	0.12193	TRUE	19.536	2.09708	6.01035e-220	0.152901	down	4.24309e-219	All genes	FALSE	FALSE
DRC7	DRC7	-0.00157455	1.32685	0.098053	0.494791	0.586278	0.413722	TRUE	34.6307	2.18081	0	0.231073	up	0	All genes	FALSE	FALSE
CFAP20	CFAP20	-0.00414567	1.41719	0.0957311	0.556351	0.495009	0.504991	TRUE	31.5959	1.86487	0	0.153597	up	0	All genes	FALSE	FALSE
CCDC113	CCDC113	-0.00514978	1.95416	0.0940696	0.840274	0.325632	0.674368	TRUE	27.6157	1.28291	0	0.458744	up	0	All genes	TRUE	FALSE
CNOT1	CNOT1	-0.0019687	1.27035	0.0980924	0.451818	0.568404	0.431596	TRUE	35.8854	3.32339	3.72989e-180	0.0439496	up	2.23192e-179	All genes	FALSE	FALSE
RRAD	RRAD	-0.000575205	1.68963	0.0960464	0.800752	0.453501	0.546499	TRUE	30.7156	1.66389	0	0.210907	up	0	All genes	FALSE	FALSE
CES4A	CES4A	-0.00226157	1.37392	0.0982288	0.568329	0.601225	0.398775	TRUE	35.2149	2.23095	0	0.18292	up	0	All genes	FALSE	FALSE
TPPP3	TPPP3	-0.00152208	3.88714	0.0968311	1.2075	0.181093	0.818907	TRUE	19.7872	1.07685	0	0.659584	up	0	All genes	TRUE	FALSE
ZDHHC1	ZDHHC1	-0.00500133	1.73768	0.095532	0.795715	0.367772	0.632228	TRUE	27.834	1.38516	0	0.264451	up	0	All genes	FALSE	FALSE
ENKD1	ENKD1	-0.00329732	1.27254	0.0964229	0.496075	0.612856	0.387144	TRUE	35.8326	2.33395	0	0.139952	up	0	All genes	FALSE	FALSE
TSNAXIP1	TSNAXIP1	-0.000439183	1.30435	0.0978922	0.463426	0.589183	0.410817	TRUE	34.6792	2.1665	0	0.215247	up	0	All genes	FALSE	FALSE
NQO1	NQO1	-0.00217769	1.77757	0.0935242	0.885206	0.409149	0.590851	TRUE	29.3242	1.53023	0	0.229312	up	0	All genes	FALSE	FALSE
MTSS1L	MTSS1L	-0.000606589	1.30429	0.0975992	0.516985	0.590922	0.409078	TRUE	35.4982	2.41553	0	0.105089	up	0	All genes	FALSE	FALSE
HYDIN	HYDIN	-0.00205998	2.04011	0.0956913	0.82835	0.302064	0.697936	TRUE	26.7709	1.2155	0	0.512147	up	0	All genes	FALSE	FALSE
CFDP1	CFDP1	-0.00343657	1.64096	0.0938586	0.713141	0.318893	0.681107	TRUE	23.1124	1.65458	0	0.116907	up	0	All genes	FALSE	FALSE
DYNLRB2	DYNLRB2	-0.00295671	2.98694	0.0990047	1.07337	0.232679	0.767321	TRUE	23.1983	0.996015	0	0.639393	up	0	All genes	TRUE	FALSE
CMIP	CMIP	-0.00230449	1.38654	0.0969844	0.576889	0.489633	0.510367	TRUE	31.2792	2.13564	0	0.0986485	up	0	All genes	FALSE	FALSE
HSBP1	HSBP1	1.06916	3.27883	0.829506	0.942784	0.24121	0.75879	TRUE	20.8827	1.15866	0	0.252821	up	0	All genes	TRUE	FALSE
MBTPS1	MBTPS1	0.000112504	1.27461	0.0982465	0.468791	0.546123	0.453877	TRUE	34.9354	3.59649	1.03026e-148	0.0348287	up	5.2074e-148	All genes	FALSE	TRUE
DNAAF1	DNAAF1	1.81971e-05	2.29268	0.0976576	0.887115	0.266914	0.733086	TRUE	25.3425	1.11949	0	0.601687	up	0	All genes	FALSE	FALSE
USP10	USP10	-0.00256846	1.33842	0.0966755	0.56992	0.578985	0.421015	TRUE	36.156	2.93164	3.30617e-235	0.0613998	up	2.45498e-234	All genes	FALSE	FALSE
FAM92B	FAM92B	-0.00220035	2.64294	0.0964557	0.959649	0.253968	0.746032	TRUE	24.7632	1.10967	0	0.672893	up	0	All genes	FALSE	FALSE
SPATA33	SPATA33	-0.00244666	1.52303	0.0956138	0.605187	0.427516	0.572484	TRUE	29.8134	1.53679	0	0.253309	up	0	All genes	FALSE	FALSE
RP11-368I7.4	RP11-368I7.4	-0.0023776	1.43938	0.0968548	0.592346	0.519075	0.480925	TRUE	33.0491	1.91693	0	0.270112	up	0	All genes	FALSE	FALSE
GAS8	GAS8	-0.00209965	1.35059	0.0976898	0.513131	0.537934	0.462066	TRUE	33.1432	1.96633	0	0.165998	up	0	All genes	FALSE	FALSE
C17orf97	C17orf97	-0.00389325	1.47012	0.0958205	0.603144	0.486378	0.513622	TRUE	31.7974	1.74208	0	0.234247	up	0	All genes	FALSE	FALSE
TAX1BP3	TAX1BP3	-0.00336661	1.18392	0.0970255	0.436172	0.776509	0.223491	TRUE	17.5009	2.31143	6.00763e-191	0.0654263	down	3.76018e-190	All genes	FALSE	FALSE
ALOX15	ALOX15	-0.000886938	1.90812	0.0950808	0.911882	0.428056	0.571944	TRUE	30.0988	1.55893	0	0.255167	up	0	All genes	FALSE	FALSE
VMO1	VMO1	1.28391e-05	1.81183	0.0981145	1.18011	0.858507	0.141493	TRUE	20.9759	1.47491	0	0.324619	down	0	All genes	FALSE	FALSE
SPAG7	SPAG7	-0.0021573	1.37004	0.0965975	0.523712	0.434162	0.565838	TRUE	26.7157	2.94773	1.21424e-167	0.0379598	up	6.80243e-167	All genes	FALSE	FALSE
MED31	MED31	-0.000950473	1.27344	0.097635	0.461093	0.581632	0.418368	TRUE	36.0452	2.97251	1.15315e-227	0.0586891	up	8.34275e-227	All genes	FALSE	FALSE
TEKT1	TEKT1	0.00253816	2.11726	0.0954095	0.840569	0.293329	0.706671	TRUE	26.6643	1.22203	0	0.558444	up	0	All genes	FALSE	FALSE
ACAP1	ACAP1	-0.00149052	1.31742	0.0960662	0.506893	0.638198	0.361802	TRUE	36.2488	2.41306	0	0.170029	up	0	All genes	FALSE	FALSE
WRAP53	WRAP53	-0.00233192	1.23366	0.0990484	0.411059	0.655308	0.344692	TRUE	36.949	2.51023	0	0.143808	up	0	All genes	FALSE	FALSE
DNAH2	DNAH2	-0.00422351	1.44193	0.0980083	0.579193	0.489821	0.510179	TRUE	32.1257	1.77546	0	0.270366	up	0	All genes	FALSE	FALSE
CYB5D1	CYB5D1	-0.00105007	1.28814	0.0981954	0.482018	0.623537	0.376463	TRUE	35.9178	2.33784	0	0.159116	up	0	All genes	FALSE	FALSE
TMEM107	TMEM107	-0.00226296	1.62597	0.0933649	0.687254	0.366784	0.633216	TRUE	27.8602	1.3653	0	0.2832	up	0	All genes	FALSE	FALSE
CFAP52	CFAP52	-0.000507713	1.65078	0.095049	0.674052	0.383773	0.616227	TRUE	29.3751	1.45023	0	0.379036	up	0	All genes	FALSE	FALSE
DNAH9	DNAH9	-0.001934	1.98749	0.0969199	0.791883	0.314917	0.685083	TRUE	27.2256	1.25343	0	0.494628	up	0	All genes	FALSE	FALSE
RASD1	RASD1	-0.00106775	1.49706	0.0985548	0.866944	0.888751	0.111249	TRUE	20.1066	2.05255	1.73742e-227	0.189218	down	1.25475e-226	All genes	FALSE	FALSE
DRC3	DRC3	-0.00489502	1.93924	0.0957749	0.780153	0.321229	0.678771	TRUE	27.3639	1.26113	0	0.469672	up	0	All genes	FALSE	FALSE
ALKBH5	ALKBH5	-0.00367697	1.31993	0.0965307	0.519307	0.541891	0.458109	TRUE	33.6535	2.45312	0	0.0818004	up	0	All genes	FALSE	FALSE
B9D1	B9D1	-0.00407448	1.91507	0.0962047	0.793888	0.312294	0.687706	TRUE	26.1117	1.19724	0	0.360797	up	0	All genes	FALSE	FALSE
LGALS9	LGALS9	-0.00194905	1.14223	0.0992436	0.370222	0.846462	0.153538	TRUE	16.9245	2.7008	1.07806e-134	0.0667368	down	4.98055e-134	All genes	FALSE	FALSE
IFT20	IFT20	-0.00380269	1.40093	0.0960928	0.565431	0.443723	0.556277	TRUE	28.8251	2.12093	0	0.0858867	up	0	All genes	FALSE	FALSE
OMG	OMG	-0.00063734	2.36467	0.094623	1.1103	0.352766	0.647234	TRUE	28.5782	1.37178	0	0.420743	up	0	All genes	FALSE	FALSE
COPRS	COPRS	0.000689984	1.59689	0.0951976	0.686377	0.386494	0.613506	TRUE	28.0087	1.46916	0	0.217848	up	0	All genes	FALSE	FALSE
SLFN13	SLFN13	-0.00201513	1.41892	0.0952509	0.578278	0.496895	0.503105	TRUE	32.0551	1.78054	0	0.219817	up	0	All genes	FALSE	FALSE
GAS2L2	GAS2L2	-0.000225285	1.24626	0.0984189	0.447913	0.678965	0.321035	TRUE	37.278	2.65455	0	0.16738	up	0	All genes	FALSE	FALSE
DUSP14	DUSP14	-0.000716955	1.27439	0.0979329	0.477703	0.594616	0.405384	TRUE	36.5966	2.91257	2.98001e-242	0.0647676	up	2.28981e-241	All genes	FALSE	FALSE
IGFBP4	IGFBP4	-0.00185726	1.35646	0.0970531	0.620818	0.636629	0.363371	TRUE	17.9563	2.82774	6.50789e-137	0.0316989	down	3.04971e-136	All genes	FALSE	TRUE
KRT15	KRT15	-0.00126039	1.96331	0.0971922	1.46974	0.868106	0.131894	TRUE	20.8751	1.48028	0	0.351601	down	0	All genes	FALSE	TRUE
KRT19	KRT19	2.09326	4.90204	1.25499	1.38022	0.83713	0.16287	TRUE	15.8954	1.06508	0	0.389297	down	0	All genes	FALSE	TRUE
KRT17	KRT17	0.000339692	2.68895	0.100052	1.71902	0.883216	0.116784	TRUE	20.8918	1.5477	0	0.354743	down	0	All genes	FALSE	TRUE
JUP	JUP	-0.00389207	1.25298	0.0971373	0.518668	0.648144	0.351856	TRUE	18.2955	2.61836	3.62568e-160	0.0375562	down	1.95218e-159	All genes	FALSE	TRUE
TTC25	TTC25	-0.000488493	1.44187	0.0965642	0.57527	0.503555	0.496445	TRUE	32.6035	1.84852	0	0.278247	up	0	All genes	FALSE	FALSE
VPS25	VPS25	-0.00200983	1.31841	0.0974127	0.483185	0.496241	0.503759	TRUE	31.2009	3.21387	2.36443e-164	0.0376875	up	1.30579e-163	All genes	FALSE	FALSE
LRRC46	LRRC46	-0.00149679	2.36922	0.0971866	0.895472	0.261552	0.738448	TRUE	25.0797	1.10601	0	0.620564	up	0	All genes	TRUE	FALSE
ANKFN1	ANKFN1	-0.00142751	1.24346	0.0986348	0.423964	0.629146	0.370854	TRUE	35.9085	2.34492	0	0.169689	up	0	All genes	FALSE	FALSE
MSI2	MSI2	-0.0044237	1.5219	0.0951405	0.646623	0.363046	0.636954	TRUE	24.7344	1.90606	0	0.0905278	up	0	All genes	FALSE	FALSE
2023-03-10	2023-03-10	-0.00193226	1.35078	0.0979108	0.512149	0.553242	0.446758	TRUE	33.7588	2.01039	0	0.227996	up	0	All genes	FALSE	FALSE
CYB561	CYB561	-0.00359433	1.4429	0.0966075	0.596509	0.414377	0.585623	TRUE	27.5452	1.96173	0	0.0964451	up	0	All genes	FALSE	FALSE
PRR29	PRR29	-0.00160472	1.67509	0.0962455	0.69048	0.375397	0.624603	TRUE	29.0048	1.41144	0	0.378651	up	0	All genes	FALSE	FALSE
AMZ2	AMZ2	-0.00215195	1.28738	0.0991335	0.480211	0.554845	0.445155	TRUE	34.4646	2.71354	1.48452e-259	0.0664918	up	1.20773e-258	All genes	FALSE	FALSE
DNAI2	DNAI2	-0.00209973	1.67426	0.0961205	0.666335	0.375695	0.624305	TRUE	29.1935	1.43424	0	0.403293	up	0	All genes	FALSE	FALSE
KIF19	KIF19	-0.00328721	1.37202	0.0966343	0.523842	0.540858	0.459142	TRUE	33.4718	1.97333	0	0.246138	up	0	All genes	FALSE	FALSE
FDXR	FDXR	-0.00177056	1.33996	0.0966061	0.502964	0.533585	0.466415	TRUE	32.9992	2.13697	0	0.115473	up	0	All genes	FALSE	FALSE
SMIM5	SMIM5	-0.00199087	1.25179	0.0991451	0.444075	0.652245	0.347755	TRUE	36.9418	2.50664	0	0.140683	up	0	All genes	FALSE	FALSE
ST6GALNAC2	ST6GALNAC2	-0.00298069	1.49088	0.0965724	0.608312	0.436397	0.563603	TRUE	29.2524	1.72975	0	0.149385	up	0	All genes	FALSE	FALSE
SEC14L1	SEC14L1	-0.00196705	1.3235	0.0980212	0.522261	0.519944	0.480056	TRUE	32.9505	3.13222	1.03872e-183	0.0432129	up	6.30329e-183	All genes	FALSE	TRUE
TMC6	TMC6	0.00085282	1.09349	0.0992054	0.267894	0.890054	0.109946	TRUE	16.6895	3.14709	3.59165e-98	0.0667126	down	1.27884e-97	All genes	FALSE	TRUE
SYNGR2	SYNGR2	-0.00365252	1.44666	0.0934557	0.758848	0.448657	0.551343	TRUE	32.3803	2.94766	1.27266e-203	0.0482175	down	8.47884e-203	All genes	FALSE	TRUE
CCDC40	CCDC40	-0.0023815	1.39466	0.096717	0.553139	0.520774	0.479226	TRUE	32.8592	1.8744	0	0.231508	up	0	All genes	FALSE	FALSE
PCYT2	PCYT2	-0.000879181	1.30497	0.0970904	0.489827	0.572745	0.427255	TRUE	34.4912	2.21008	0	0.127505	up	0	All genes	FALSE	FALSE
DCXR	DCXR	-0.00291953	1.28978	0.0974512	0.529624	0.612974	0.387026	TRUE	21.6703	2.60474	2.61497e-180	0.0416315	down	1.56591e-179	All genes	TRUE	FALSE
WDR45B	WDR45B	-0.00147968	1.29445	0.0982953	0.476367	0.532155	0.467845	TRUE	33.8502	3.48418	7.44541e-153	0.0355227	up	3.86366e-152	All genes	FALSE	TRUE
ENOSF1	ENOSF1	-0.0014172	1.29893	0.0982935	0.482844	0.511346	0.488654	TRUE	32.145	2.73317	2.56033e-235	0.0566851	up	1.90462e-234	All genes	FALSE	FALSE
DLGAP1-AS1	DLGAP1-AS1	-0.00017198	1.2823	0.0977556	0.469876	0.625446	0.374554	TRUE	37.307	2.74765	1.56639e-281	0.0842281	up	1.39829e-280	All genes	FALSE	TRUE
SS18	SS18	-0.00320703	1.23787	0.0980481	0.422829	0.592814	0.407186	TRUE	37.1766	3.3328	3.2011e-187	0.0472102	up	1.97035e-186	All genes	FALSE	FALSE
SMAD2	SMAD2	-0.00261265	1.29502	0.0983531	0.464701	0.521754	0.478246	TRUE	32.9129	3.2434	5.02084e-171	0.0398861	up	2.87388e-170	All genes	FALSE	TRUE
CFAP53	CFAP53	-0.00244062	2.20311	0.0942437	0.898149	0.273431	0.726569	TRUE	25.4019	1.10764	0	0.529823	up	0	All genes	FALSE	FALSE
NARS	NARS	-0.0010866	1.35302	0.0969481	0.509426	0.477854	0.522146	TRUE	30.0351	2.78491	2.24777e-210	0.0490149	up	1.53639e-209	All genes	FALSE	FALSE
NEDD4L	NEDD4L	-0.00179556	1.50898	0.0937472	0.619735	0.35351	0.64649	TRUE	20.2003	2.77647	5.29081e-152	0.0349226	up	2.72824e-151	All genes	FALSE	TRUE
FBXO15	FBXO15	-0.00227702	1.45239	0.0978447	0.584564	0.510764	0.489236	TRUE	32.8016	1.87855	0	0.27484	up	0	All genes	FALSE	FALSE
CNDP2	CNDP2	-0.00399278	1.37162	0.0966356	0.543988	0.439515	0.560485	TRUE	27.1725	3.03833	2.31355e-160	0.036212	up	1.24733e-159	All genes	FALSE	TRUE
C20orf96	C20orf96	-0.0037908	1.52452	0.0965344	0.62721	0.432087	0.567913	TRUE	30.2039	1.55689	0	0.270561	up	0	All genes	FALSE	FALSE
RP11-128M1.1	RP11-128M1.1	-0.00302195	1.77266	0.0955687	0.774486	0.398784	0.601216	TRUE	29.9035	1.50782	0	0.367008	up	0	All genes	FALSE	FALSE
SPEF1	SPEF1	-0.00275615	1.53531	0.0970231	0.616281	0.445884	0.554116	TRUE	31.0315	1.63667	0	0.31426	up	0	All genes	FALSE	FALSE
DZANK1	DZANK1	-0.00239317	1.26043	0.0978859	0.452781	0.645201	0.354799	TRUE	36.5268	2.44663	0	0.157122	up	0	All genes	FALSE	FALSE
NAA20	NAA20	-0.00395229	1.41487	0.0961357	0.56461	0.422256	0.577744	TRUE	26.386	2.70062	4.60838e-197	0.0451503	up	2.96388e-196	All genes	FALSE	FALSE
CFAP61	CFAP61	-0.000188993	1.2676	0.0987405	0.444357	0.631285	0.368715	TRUE	35.7946	2.38169	0	0.198897	up	0	All genes	FALSE	FALSE
RALGAPA2	RALGAPA2	-0.00237037	1.26585	0.098002	0.453908	0.59051	0.40949	TRUE	36.868	3.18204	1.09109e-203	0.0520664	up	7.27515e-203	All genes	FALSE	TRUE
XRN2	XRN2	-0.00422365	1.35555	0.097706	0.519209	0.469725	0.530275	TRUE	29.3019	3.27919	4.27167e-148	0.033402	up	2.14846e-147	All genes	FALSE	FALSE
ID1	ID1	-0.000397456	1.799	0.0977846	1.03199	0.602322	0.397678	TRUE	24.1111	2.00954	0	0.0785783	down	0	All genes	FALSE	FALSE
BCL2L1	BCL2L1	-0.00340057	1.54924	0.0936539	0.658416	0.350511	0.649489	TRUE	23.6975	1.95029	0	0.0826592	up	0	All genes	FALSE	FALSE
TTLL9	TTLL9	-0.00124446	1.24997	0.0977613	0.428104	0.652725	0.347275	TRUE	36.4972	2.47743	0	0.173856	up	0	All genes	FALSE	FALSE
KIF3B	KIF3B	-0.00287466	1.37954	0.0963489	0.59396	0.541931	0.458069	TRUE	33.5556	2.14957	0	0.121618	up	0	All genes	FALSE	FALSE
BPIFB1	BPIFB1	0.00132212	3.39277	0.0974781	2.85798	0.598661	0.401339	TRUE	24.8312	1.95191	0	0.0861749	down	0	All genes	TRUE	FALSE
MAP1LC3A	MAP1LC3A	-0.00273111	1.4464	0.0966667	0.592546	0.399234	0.600766	TRUE	24.2275	2.86408	3.46268e-163	0.0369867	up	1.8982e-162	All genes	FALSE	FALSE
MMP24-AS1	MMP24-AS1	-0.00422858	1.5704	0.0954072	0.678537	0.316451	0.683549	TRUE	18.9928	2.37345	2.51339e-197	0.0470191	up	1.61904e-196	All genes	FALSE	TRUE
SAMHD1	SAMHD1	-0.00548493	1.5786	0.0942566	0.69678	0.376253	0.623747	TRUE	26.5049	1.67437	0	0.133445	up	0	All genes	FALSE	FALSE
VSTM2L	VSTM2L	-0.00144514	1.41616	0.0958	0.595042	0.471505	0.528495	TRUE	30.0529	2.59086	2.24805e-243	0.0576317	up	1.73391e-242	All genes	FALSE	FALSE
TGM2	TGM2	-0.000516612	1.36312	0.0981463	0.794643	0.819647	0.180353	TRUE	17.0767	2.59887	6.64256e-147	0.0660698	down	3.31641e-146	All genes	FALSE	FALSE
PTPRT	PTPRT	-0.00416627	1.45108	0.0974533	0.61586	0.563384	0.436616	TRUE	34.1639	2.08773	0	0.233405	up	0	All genes	FALSE	FALSE
IFT52	IFT52	-0.00125636	1.28539	0.0980968	0.465682	0.572705	0.427295	TRUE	34.6326	2.3358	0	0.104872	up	0	All genes	FALSE	FALSE
PKIG	PKIG	-0.000975501	1.47587	0.0967702	0.592568	0.429984	0.570016	TRUE	29.4156	1.59802	0	0.196142	up	0	All genes	FALSE	FALSE
EPPIN	EPPIN	-0.00303596	1.47598	0.097827	0.676086	0.612332	0.387668	TRUE	35.5279	2.31839	0	0.198777	up	0	All genes	FALSE	FALSE
ATP9A	ATP9A	-0.00101088	1.27184	0.0977121	0.457844	0.593489	0.406511	TRUE	35.6939	2.53334	0	0.0907676	up	0	All genes	FALSE	TRUE
C20orf85	C20orf85	0.000980243	4.42637	0.0998896	1.28918	0.198879	0.801121	TRUE	20.4576	1.23608	0	0.77177	up	0	All genes	TRUE	FALSE
LKAAEAR1	LKAAEAR1	-0.00224513	1.49223	0.0963205	0.616852	0.578738	0.421262	TRUE	34.5313	2.15449	0	0.22769	up	0	All genes	FALSE	FALSE
GRIN3B	GRIN3B	-0.00110238	1.32286	0.0975877	0.506879	0.589782	0.410218	TRUE	34.7559	2.18495	0	0.217369	up	0	All genes	FALSE	FALSE
CNN2	CNN2	-0.00163549	1.27641	0.0977692	0.56532	0.732045	0.267955	TRUE	20.5844	1.7087	0	0.116218	down	0	All genes	FALSE	FALSE
SCAMP4	SCAMP4	-0.00299077	1.39181	0.0976385	0.542513	0.450385	0.549615	TRUE	29.4201	1.92562	0	0.112987	up	0	All genes	FALSE	FALSE
GNA11	GNA11	-0.00260978	1.27864	0.0992151	0.481111	0.5787	0.4213	TRUE	35.822	2.87636	9.92302e-242	0.0630003	up	7.6176e-241	All genes	FALSE	TRUE
TJP3	TJP3	-0.00232142	1.42091	0.0951751	0.567681	0.429355	0.570645	TRUE	28.5265	1.86629	0	0.115245	up	0	All genes	FALSE	FALSE
TNFAIP8L1	TNFAIP8L1	-0.00046659	1.56708	0.0960628	0.658212	0.445599	0.554401	TRUE	31.0207	1.63472	0	0.308372	up	0	All genes	FALSE	FALSE
PLIN3	PLIN3	-0.000615726	1.24404	0.0984592	0.427331	0.583565	0.416435	TRUE	37.463	3.78324	4.69093e-146	0.0352485	up	2.3278e-145	All genes	FALSE	FALSE
HSD11B1L	HSD11B1L	-0.00161854	1.26574	0.0993467	0.446169	0.618145	0.381855	TRUE	35.9075	2.34632	0	0.138537	up	0	All genes	FALSE	FALSE
CATSPERD	CATSPERD	-0.00478176	1.90396	0.0957054	0.805377	0.368079	0.631921	TRUE	29.0068	1.41538	0	0.411107	up	0	All genes	FALSE	FALSE
CAPS	CAPS	0.659563	4.50798	0.762555	1.06561	0.241333	0.758667	TRUE	24.1009	1.07305	0	0.695484	up	0	All genes	FALSE	FALSE
CTXN1	CTXN1	-0.00115493	1.60033	0.0959212	0.738966	0.470531	0.529469	TRUE	31.7654	1.72776	0	0.278645	up	0	All genes	FALSE	FALSE
CERS4	CERS4	-0.00524462	1.4365	0.0953744	0.580126	0.435053	0.564947	TRUE	27.9104	2.34058	2.96251e-276	0.0655398	up	2.57972e-275	All genes	FALSE	TRUE
NDUFA7	NDUFA7	-0.00173396	1.27767	0.0986649	0.455017	0.558904	0.441096	TRUE	35.2096	3.23656	9.06326e-186	0.0450606	up	5.53693e-185	All genes	FALSE	FALSE
TMEM205	TMEM205	-0.00300989	1.36517	0.0947659	0.650583	0.546221	0.453779	TRUE	27.3434	2.18443	0	0.0745788	down	0	All genes	FALSE	FALSE
CCDC151	CCDC151	-0.000912725	1.3167	0.098249	0.490484	0.607675	0.392325	TRUE	35.1777	2.28356	0	0.219558	up	0	All genes	FALSE	FALSE
ELOF1	ELOF1	-0.00106903	1.27831	0.0977275	0.458996	0.544575	0.455425	TRUE	33.8872	2.71174	1.61292e-254	0.0640295	up	1.28907e-253	All genes	FALSE	FALSE
FBXW9	FBXW9	-0.00121378	1.30811	0.0982866	0.484785	0.573427	0.426573	TRUE	34.3361	2.10698	0	0.162179	up	0	All genes	FALSE	FALSE
TPM4	TPM4	-0.00191922	1.33052	0.0952615	0.657516	0.644013	0.355987	TRUE	22.3778	1.80501	0	0.0936214	down	0	All genes	FALSE	FALSE
NWD1	NWD1	-0.00327155	1.46192	0.0965881	0.637393	0.536183	0.463817	TRUE	33.4212	1.95614	0	0.228475	up	0	All genes	FALSE	FALSE
OCEL1	OCEL1	-0.000174034	1.41156	0.0961625	0.570681	0.466265	0.533735	TRUE	30.3535	1.87411	0	0.131062	up	0	All genes	FALSE	FALSE
LSM4	LSM4	-0.00349259	1.48708	0.0950287	0.591838	0.345186	0.654814	TRUE	18.8207	2.86299	2.85862e-137	0.0315716	up	1.34345e-136	All genes	FALSE	TRUE
SSBP4	SSBP4	-0.00131218	1.59426	0.0943788	0.685293	0.356038	0.643962	TRUE	26.3406	1.46642	0	0.186257	up	0	All genes	FALSE	FALSE
RHPN2	RHPN2	-0.00237926	1.28433	0.0983941	0.470906	0.594617	0.405383	TRUE	35.5952	2.45035	0	0.100926	up	0	All genes	FALSE	FALSE
FXYD1	FXYD1	-0.00250615	1.47691	0.0969207	0.705621	0.649571	0.350429	TRUE	37.1506	2.54498	0	0.141203	up	0	All genes	FALSE	TRUE
FXYD5	FXYD5	0.000405318	1.22208	0.0990304	0.503628	0.882019	0.117981	TRUE	20.6444	1.81735	5.74312e-291	0.229098	down	5.31858e-290	All genes	FALSE	TRUE
DMKN	DMKN	-0.00366415	2.06231	0.0916738	0.836872	0.174804	0.825196	TRUE	17.0075	1.2071	0	0.208743	up	0	All genes	FALSE	FALSE
PSENEN	PSENEN	-0.00416854	2.72552	0.0932705	1.06134	0.174447	0.825553	TRUE	19.2323	0.980039	0	0.406241	up	0	All genes	TRUE	FALSE
POLR2I	POLR2I	-0.00121167	2.57019	0.0925491	1.0466	0.134262	0.865738	TRUE	15.0326	1.15292	0	0.239949	up	0	All genes	TRUE	TRUE
TBCB	TBCB	-0.00161671	1.4722	0.0974077	0.582913	0.372051	0.627949	TRUE	22.2143	2.67402	1.74179e-174	0.0400537	up	1.01767e-173	All genes	FALSE	FALSE
LGALS7	LGALS7	-0.00113081	1.58439	0.0975068	1.2702	0.871283	0.128717	TRUE	17.4888	2.76227	3.45269e-127	0.0833114	down	1.5154e-126	All genes	FALSE	TRUE
LGALS7B	LGALS7B	0.00114115	1.55191	0.0975701	1.2261	0.841175	0.158825	TRUE	17.6158	2.5903	7.30885e-148	0.0779442	down	3.66925e-147	All genes	FALSE	TRUE
CYP2F1	CYP2F1	-0.00212534	1.95897	0.098975	1.08891	0.865018	0.134982	TRUE	21.2401	1.38921	0	0.424271	down	0	All genes	FALSE	FALSE
B9D2	B9D2	-0.00276069	1.46215	0.0984753	0.603119	0.470466	0.529534	TRUE	31.0561	1.70789	0	0.20119	up	0	All genes	FALSE	FALSE
ETHE1	ETHE1	-0.00103041	1.1811	0.0980701	0.472199	0.768008	0.231992	TRUE	16.0796	2.51968	6.10233e-156	0.0513336	down	3.20952e-155	All genes	FALSE	TRUE
PPP1R13L	PPP1R13L	0.000101144	1.12673	0.0997133	0.343704	0.852015	0.147985	TRUE	15.4938	3.04671	2.14997e-103	0.0519882	down	7.93535e-103	All genes	FALSE	TRUE
ERCC1	ERCC1	-0.0014616	1.32833	0.0969512	0.531653	0.51344	0.48656	TRUE	32.6111	3.15156	2.39082e-179	0.0419299	up	1.42646e-178	All genes	FALSE	TRUE
CALM3	CALM3	-0.00249694	1.41625	0.0974109	0.575375	0.426907	0.573093	TRUE	27.3284	2.40544	3.45805e-256	0.0601612	up	2.77732e-255	All genes	FALSE	TRUE
C5AR1	C5AR1	-0.00123001	1.23421	0.0987613	0.424325	0.658401	0.341599	TRUE	36.9866	2.52384	0	0.148786	up	0	All genes	FALSE	FALSE
CCDC114	CCDC114	-0.00258442	1.66105	0.0947016	0.717568	0.39762	0.60238	TRUE	29.5643	1.47036	0	0.337798	up	0	All genes	FALSE	FALSE
CYTH2	CYTH2	-0.00145422	1.28617	0.0980898	0.459675	0.538437	0.461563	TRUE	34.3797	3.6752	8.99911e-140	0.0323308	up	4.29601e-139	All genes	FALSE	FALSE
SULT2B1	SULT2B1	-0.000699102	1.29222	0.0970826	0.583309	0.767825	0.232175	TRUE	18.3435	2.12298	4.69933e-229	0.0783182	down	3.42104e-228	All genes	FALSE	FALSE
FUT2	FUT2	0.000758484	1.10314	0.10029	0.286191	0.877951	0.122049	TRUE	15.1115	3.35989	5.70232e-84	0.0506302	down	1.81443e-83	All genes	FALSE	FALSE
PPP1R15A	PPP1R15A	-0.0035727	1.55321	0.0941692	0.68871	0.355246	0.644754	TRUE	23.4676	2.12314	5.28162e-285	0.0681071	up	4.79337e-284	All genes	FALSE	FALSE
RUVBL2	RUVBL2	-0.00566656	2.10485	0.0946791	0.888114	0.236842	0.763158	TRUE	22.0689	1.09395	0	0.313156	up	0	All genes	FALSE	FALSE
FUZ	FUZ	-0.0015064	1.48963	0.0956306	0.599532	0.458626	0.541374	TRUE	30.6973	1.64902	0	0.220118	up	0	All genes	FALSE	FALSE
MED25	MED25	-0.00343603	1.33737	0.0966167	0.513883	0.530608	0.469392	TRUE	32.9034	2.04817	0	0.132002	up	0	All genes	FALSE	FALSE
PTOV1	PTOV1	-0.00513616	1.50542	0.0946612	0.621352	0.357434	0.642566	TRUE	22.2441	2.39869	1.43722e-215	0.0504014	up	9.99934e-215	All genes	FALSE	FALSE
MYH14	MYH14	-0.00528249	1.46632	0.0951682	0.604433	0.384999	0.615001	TRUE	23.3129	2.74644	8.36444e-172	0.0391967	up	4.80455e-171	All genes	FALSE	FALSE
JOSD2	JOSD2	-0.00375341	1.57929	0.0948124	0.691298	0.365673	0.634327	TRUE	25.453	1.79019	0	0.107728	up	0	All genes	FALSE	FALSE
KLK10	KLK10	0.00105875	1.667	0.0986834	1.02973	0.873021	0.126979	TRUE	20.6573	1.47997	0	0.369123	down	0	All genes	FALSE	FALSE
KLK11	KLK11	0.00040272	2.01803	0.0974761	1.08122	0.802395	0.197605	TRUE	22.4703	1.13978	0	0.517266	down	0	All genes	FALSE	FALSE
TMC4	TMC4	-0.00172244	1.57031	0.0971458	0.653453	0.316792	0.683208	TRUE	21.1548	1.96375	2.20809e-304	0.0748631	up	2.14711e-303	All genes	FALSE	FALSE
LENG8	LENG8	-0.0043043	1.42372	0.0961401	0.620983	0.411059	0.588941	TRUE	25.5766	2.83643	5.01353e-174	0.0395231	up	2.92504e-173	All genes	FALSE	FALSE
DNAAF3	DNAAF3	-0.00500518	1.73623	0.096744	0.705923	0.369233	0.630767	TRUE	29.0662	1.42308	0	0.416093	up	0	All genes	FALSE	FALSE
HSPBP1	HSPBP1	-0.00169615	1.6751	0.0957253	0.728692	0.350743	0.649257	TRUE	26.376	1.41734	0	0.205582	up	0	All genes	FALSE	FALSE
TMEM190	TMEM190	-0.00447585	3.70656	0.101177	1.13283	0.220306	0.779694	TRUE	22.3242	1.03713	0	0.746255	up	0	All genes	TRUE	FALSE
DDX3Y	DDX3Y	-0.00340488	1.25848	0.0987361	0.445702	0.628969	0.371031	TRUE	37.4553	2.76923	1.72876e-278	0.0835511	up	1.52161e-277	All genes	FALSE	FALSE
MRPL40	MRPL40	-0.00496704	1.52322	0.0967218	0.620995	0.344809	0.655191	TRUE	22.7474	2.03769	1.37859e-300	0.0726541	up	1.31854e-299	All genes	FALSE	FALSE
2023-09-05	2023-09-05	-0.00189651	1.22219	0.098727	0.407043	0.690076	0.309924	TRUE	37.5333	2.71575	3.70857e-302	0.164972	up	3.57634e-301	All genes	FALSE	FALSE
LRRC74B	LRRC74B	0.00019005	1.2732	0.0984162	0.471169	0.665041	0.334959	TRUE	36.7476	2.58209	0	0.183682	up	0	All genes	FALSE	FALSE
RSPH14	RSPH14	-0.00182314	1.40832	0.0964661	0.566793	0.551927	0.448073	TRUE	33.8536	2.05004	0	0.253367	up	0	All genes	FALSE	FALSE
RAB36	RAB36	-0.00465925	1.40691	0.0970769	0.56581	0.506884	0.493116	TRUE	32.566	1.83449	0	0.252153	up	0	All genes	FALSE	FALSE
C22orf15	C22orf15	-0.00360224	1.8465	0.0948925	0.779365	0.375933	0.624067	TRUE	29.3452	1.45352	0	0.411873	up	0	All genes	FALSE	FALSE
CCDC157	CCDC157	-0.00109182	1.2944	0.0971385	0.471908	0.593376	0.406624	TRUE	34.851	2.17007	0	0.185805	up	0	All genes	FALSE	FALSE
RP4-539M6.14	RP4-539M6.14	-0.00405637	1.71912	0.0946101	0.732056	0.41028	0.58972	TRUE	30.1087	1.52912	0	0.348845	up	0	All genes	FALSE	FALSE
DUSP18	DUSP18	-0.0019287	1.3008	0.0970488	0.492833	0.582556	0.417444	TRUE	34.6314	2.13875	0	0.168733	up	0	All genes	FALSE	FALSE
YWHAH	YWHAH	-0.00387984	1.72767	0.0945076	0.767603	0.303666	0.696334	TRUE	22.3729	1.62335	0	0.118777	up	0	All genes	FALSE	FALSE
IFT27	IFT27	-0.00499632	1.82986	0.0931164	0.771917	0.284235	0.715765	TRUE	24.2959	1.17829	0	0.296569	up	0	All genes	FALSE	FALSE
MPST	MPST	-0.00101714	1.19476	0.09863	0.449398	0.720854	0.279146	TRUE	17.5699	2.16888	1.74984e-220	0.0605539	down	1.23746e-219	All genes	FALSE	FALSE
ANKRD54	ANKRD54	-0.00230203	1.28558	0.0977737	0.462898	0.567351	0.432649	TRUE	34.2573	2.20613	0	0.122933	up	0	All genes	FALSE	FALSE
C22orf23	C22orf23	-0.00207932	1.27904	0.0988773	0.456641	0.639253	0.360747	TRUE	35.9748	2.43825	0	0.2021	up	0	All genes	FALSE	FALSE
FAM227A	FAM227A	-0.00204471	1.38179	0.098588	0.554503	0.551524	0.448476	TRUE	33.731	1.99948	0	0.211368	up	0	All genes	FALSE	FALSE
CBY1	CBY1	-0.00346273	1.40321	0.0970416	0.565923	0.455621	0.544379	TRUE	29.9851	1.81403	0	0.139232	up	0	All genes	FALSE	FALSE
DNAL4	DNAL4	-0.00306099	1.39636	0.0970619	0.563098	0.481783	0.518217	TRUE	31.0756	1.87098	0	0.141902	up	0	All genes	FALSE	FALSE
TNRC6B	TNRC6B	-0.00353302	1.35684	0.0962002	0.545495	0.46491	0.53509	TRUE	29.1215	3.25032	8.26623e-150	0.0337971	up	4.21201e-149	All genes	FALSE	TRUE
XPNPEP3	XPNPEP3	-0.00108401	1.21866	0.0977569	0.415831	0.629541	0.370459	TRUE	37.2556	2.69777	2.47918e-292	0.0898133	up	2.31693e-291	All genes	FALSE	FALSE
PMM1	PMM1	-0.00223079	1.40397	0.0967782	0.561038	0.474204	0.525796	TRUE	30.4424	2.09632	0	0.097485	up	0	All genes	FALSE	FALSE
CENPM	CENPM	-0.00365153	1.58477	0.0966195	0.687527	0.470351	0.529649	TRUE	31.5647	1.70281	0	0.267785	up	0	All genes	FALSE	FALSE
RIBC2	RIBC2	-0.000889285	1.31104	0.0995989	0.494038	0.62337	0.37663	TRUE	35.7261	2.32966	0	0.183393	up	0	All genes	FALSE	FALSE
PRR34-AS1	PRR34-AS1	-0.00157945	1.26367	0.0978693	0.469717	0.647524	0.352476	TRUE	37.4747	2.62516	0	0.109216	up	0	All genes	FALSE	TRUE
DENND6B	DENND6B	-0.00325257	1.51449	0.0963181	0.608851	0.434205	0.565795	TRUE	30.3819	1.56612	0	0.286512	up	0	All genes	FALSE	FALSE
TYMP	TYMP	-0.00494427	1.57177	0.0937427	0.700988	0.354262	0.645738	TRUE	24.2822	1.91941	0	0.0875408	up	0	All genes	FALSE	FALSE
ODF3B	ODF3B	-0.00229255	3.12789	0.0956219	1.20584	0.159008	0.840992	TRUE	18.8413	0.986998	0	0.517951	up	0	All genes	FALSE	FALSE
RABL2B	RABL2B	-0.00362879	1.83166	0.0949101	0.756662	0.293327	0.706673	TRUE	25.3705	1.1494	0	0.374308	up	0	All genes	FALSE	FALSE
USP16	USP16	-0.0013191	1.37263	0.0973113	0.546322	0.486144	0.513856	TRUE	30.6232	3.51519	8.1362e-135	0.030352	up	3.76951e-134	All genes	FALSE	TRUE
C21orf59	C21orf59	-0.00677803	2.03662	0.0952851	0.893079	0.22916	0.77084	TRUE	20.9675	1.17339	0	0.245465	up	0	All genes	FALSE	FALSE
TMEM50B	TMEM50B	-0.004521	1.36877	0.0984962	0.520716	0.444175	0.555825	TRUE	27.5422	2.92687	7.57804e-175	0.0397381	up	4.44346e-174	All genes	FALSE	FALSE
KCNE1	KCNE1	-0.00337756	1.24022	0.0983334	0.424124	0.66925	0.33075	TRUE	36.9968	2.58206	0	0.168203	up	0	All genes	FALSE	FALSE
CLIC6	CLIC6	-0.00207531	1.61292	0.0931264	0.708055	0.327663	0.672337	TRUE	23.0228	1.78346	0	0.0983598	up	0	All genes	FALSE	FALSE
WRB	WRB	-0.00148887	1.93644	0.0952518	0.78464	0.295032	0.704968	TRUE	24.996	1.16544	0	0.332685	up	0	All genes	FALSE	FALSE
LCA5L	LCA5L	-0.00180029	1.35026	0.0975287	0.527197	0.576183	0.423817	TRUE	34.4051	2.10721	0	0.20724	up	0	All genes	FALSE	FALSE
FAM3B	FAM3B	9.13662e-05	1.26517	0.0993232	0.538809	0.877904	0.122096	TRUE	20.6156	1.7933	1.28981e-298	0.227633	down	1.22645e-297	All genes	FALSE	FALSE
RSPH1	RSPH1	-0.00337099	3.43937	0.0986862	1.12395	0.211354	0.788646	TRUE	21.6511	1.07416	0	0.765292	up	0	All genes	TRUE	FALSE
NDUFV3	NDUFV3	-0.00213282	1.37242	0.0971458	0.527901	0.457115	0.542885	TRUE	28.4484	3.03755	1.62245e-167	0.0380222	up	9.07683e-167	All genes	FALSE	FALSE
C21orf2	C21orf2	-0.00101112	1.34105	0.0982926	0.514402	0.50505	0.49495	TRUE	31.8064	2.23019	0	0.0915194	up	0	All genes	FALSE	FALSE
C21orf58	C21orf58	-0.00208704	1.8272	0.0957658	0.749594	0.336989	0.663011	TRUE	27.8891	1.30576	0	0.435745	up	0	All genes	FALSE	FALSE

## Sheet: Epithelial_Control
	geneID	mu1	mu2	sigma1	sigma2	lambda1	lambda2	passBinary	switch_at_time	CI	pvalues	pseudoR2s	direction	FDR	feature_type	distinct switch genes (Control vs IPF)
HES4	HES4	-0.00120597	1.58715	0.0971364	0.794339	0.5301	0.4699	TRUE	30.4381	7.0573	9.62952e-37	0.0526918	down	9.19248e-36	TFs	FALSE
TP73	TP73	-0.00262141	1.3265	0.0974024	0.514457	0.573817	0.426183	TRUE	36.1307	6.88767	3.95228e-47	0.118497	up	5.07891e-46	TFs	FALSE
ECE1	ECE1	-0.00340354	1.19272	0.0977123	0.412863	0.855719	0.144281	TRUE	23.0659	5.93721	2.47042e-38	0.127287	down	2.46108e-37	Surface proteins	FALSE
PTPRF	PTPRF	-0.0106826	1.72732	0.09496	0.739214	0.239643	0.760357	TRUE	20.0575	5.06516	3.27138e-49	0.0773629	up	4.48949e-48	Surface proteins	FALSE
CCDC17	CCDC17	-0.00129729	2.24307	0.0935438	0.960457	0.213935	0.786065	TRUE	26.736	3.43629	3.81594e-128	0.452455	up	4.73558e-126	TFs	FALSE
TSPAN1	TSPAN1	1.79538	4.30393	1.15033	0.957218	0.251959	0.748041	TRUE	22.3573	3.87262	9.04778e-87	0.158257	up	2.85811e-85	Surface proteins	FALSE
F3	F3	-0.00196082	1.61548	0.0983834	1.00853	0.858246	0.141754	TRUE	24.1229	4.70879	1.91745e-59	0.240932	down	3.35824e-58	Surface proteins	FALSE
CGN	CGN	-0.00740991	1.34966	0.0993337	0.528522	0.501373	0.498627	TRUE	33.7944	7.21887	3.47603e-39	0.0611333	up	3.53587e-38	Surface proteins	TRUE
F11R	F11R	-0.000628774	1.49096	0.0938108	0.615649	0.325561	0.674439	TRUE	22.8509	6.77952	2.37824e-31	0.0433023	up	1.9094e-30	Surface proteins	FALSE
LAMC2	LAMC2	0.000298306	1.42024	0.0953513	0.561724	0.451252	0.548748	TRUE	32.6313	5.41575	3.42443e-67	0.150852	up	7.11676e-66	Surface proteins	FALSE
ATRAID	ATRAID	-0.00750267	1.63196	0.0937822	0.642434	0.259642	0.740358	TRUE	15.3776	7.16694	4.39849e-23	0.032565	up	2.56786e-22	Surface proteins	TRUE
EPAS1	EPAS1	0.000472522	1.50274	0.102251	0.820483	0.79973	0.20027	TRUE	25.5475	3.88106	4.32905e-93	0.306381	down	1.60712e-91	TFs	FALSE
IL1R1	IL1R1	-0.00455978	1.18296	0.0996934	0.465156	0.876388	0.123612	TRUE	20.9909	7.72303	3.86526e-22	0.0788851	down	2.1733e-21	Surface proteins	FALSE
NFE2L2	NFE2L2	-0.00468596	1.71032	0.0935686	0.759193	0.262373	0.737627	TRUE	15.9475	7.2813	9.24804e-23	0.0317419	up	5.33097e-22	TFs	TRUE
HSPD1	HSPD1	-0.00506038	1.937	0.0876766	0.836192	0.201124	0.798876	TRUE	15.8573	5.30606	9.55377e-40	0.0647205	up	9.9156e-39	Surface proteins	TRUE
ANKZF1	ANKZF1	0.00503057	1.26371	0.0978686	0.434569	0.582863	0.417137	TRUE	37.25	8.12362	8.9202e-35	0.0594284	up	7.95583e-34	TFs	TRUE
DNER	DNER	-0.001715	1.26849	0.0983372	0.488486	0.628667	0.371333	TRUE	37.491	7.76493	3.65919e-39	0.12007	up	3.71782e-38	Surface proteins	FALSE
IL5RA	IL5RA	-0.00283596	1.30585	0.0975116	0.4854	0.527101	0.472899	TRUE	34.7945	6.24307	7.32428e-55	0.143203	up	1.15265e-53	Surface proteins	FALSE
BHLHE40	BHLHE40	0.000246291	1.37427	0.0951537	0.729435	0.74267	0.25733	TRUE	21.8105	5.90758	1.09074e-38	0.0707517	down	1.09667e-37	TFs	FALSE
CRTAP	CRTAP	0.000370689	1.11399	0.100468	0.313574	0.883677	0.116323	TRUE	21.0532	7.61202	1.5316e-22	0.0839425	down	8.74182e-22	Surface proteins	FALSE
LZTFL1	LZTFL1	0.00181405	1.51406	0.0979536	0.622035	0.368779	0.631221	TRUE	29.4606	4.75634	4.18845e-77	0.144404	up	1.06389e-75	Surface proteins	FALSE
PLXNB1	PLXNB1	0.00208229	1.36109	0.100242	0.52102	0.499201	0.500799	TRUE	33.6518	7.04122	5.77294e-41	0.0647625	up	6.24527e-40	Surface proteins	FALSE
GLT8D1	GLT8D1	0.00244121	1.4044	0.0943591	0.573351	0.414094	0.585906	TRUE	30.5415	5.54425	3.91887e-59	0.0991007	up	6.80865e-58	Surface proteins	FALSE
TMF1	TMF1	-0.000381362	1.55527	0.0929398	0.654194	0.30838	0.69162	TRUE	24.1524	5.46671	7.17627e-49	0.073023	up	9.72547e-48	TFs	FALSE
FOXP1	FOXP1	-0.00524325	1.45181	0.0978864	0.586024	0.381246	0.618754	TRUE	25.7231	7.85317	5.85206e-26	0.0344034	up	3.84545e-25	TFs	TRUE
ST3GAL6	ST3GAL6	-0.000634928	1.49372	0.100115	0.707232	0.565679	0.434321	TRUE	36.2668	6.98096	6.82341e-46	0.103244	up	8.52877e-45	Surface proteins	FALSE
HHLA2	HHLA2	-0.00243752	1.24863	0.100423	0.424808	0.622583	0.377417	TRUE	37.5594	7.62233	2.13556e-40	0.10239	up	2.25414e-39	Surface proteins	TRUE
CCDC80	CCDC80	-0.00214384	1.68403	0.0969965	0.869201	0.542348	0.457652	TRUE	37.1891	10.2145	2.95224e-22	0.0312102	up	1.66967e-21	Surface proteins	FALSE
SLC15A2	SLC15A2	0.00119807	1.26376	0.0962878	0.518204	0.843549	0.156451	TRUE	23.9216	5.14936	2.03593e-51	0.169064	down	2.96747e-50	Surface proteins	FALSE
CD38	CD38	0.00295237	1.32965	0.09888	0.501361	0.523955	0.476045	TRUE	34.6638	6.50447	8.65274e-50	0.0954963	up	1.20846e-48	Surface proteins	FALSE
SEL1L3	SEL1L3	-0.00013756	1.24775	0.0999464	0.488602	0.766419	0.233581	TRUE	20.5786	6.66239	8.63105e-30	0.0562127	down	6.50286e-29	Surface proteins	TRUE
FAM174A	FAM174A	-0.0133301	2.1402	0.0953016	0.862626	0.166377	0.833623	TRUE	20.0191	3.39233	3.00125e-98	0.207053	up	1.36502e-96	Surface proteins	FALSE
ZNF474	ZNF474	-0.00206317	1.30247	0.0973142	0.517548	0.56762	0.43238	TRUE	36.0445	6.84656	1.73994e-47	0.114856	up	2.25594e-46	TFs	FALSE
SLC12A2	SLC12A2	5.68108e-05	1.14706	0.0967807	0.342578	0.888347	0.111653	TRUE	20.6298	8.31538	3.31646e-19	0.0729328	down	1.63322e-18	Surface proteins	TRUE
P4HA2	P4HA2	0.000758974	1.3641	0.095814	0.508865	0.48433	0.51567	TRUE	33.2173	5.98833	7.79823e-56	0.104536	up	1.24528e-54	Surface proteins	FALSE
SLC22A4	SLC22A4	-0.000314639	1.63364	0.0977677	0.662059	0.353357	0.646643	TRUE	29.9045	4.46467	3.69827e-89	0.205408	up	1.24042e-87	Surface proteins	FALSE
EGR1	EGR1	0.00232704	2.1346	0.0956785	1.10728	0.577207	0.422793	TRUE	27.0516	7.56665	5.83949e-29	0.039035	down	4.25211e-28	TFs	TRUE
SLC22A23	SLC22A23	-9.45269e-06	1.32355	0.0983404	0.49567	0.509172	0.490828	TRUE	34.0603	6.70905	9.83448e-46	0.0778709	up	1.2222e-44	Surface proteins	FALSE
HLA-DPB1	HLA-DPB1	-0.00358342	1.42877	0.0968463	0.82778	0.620031	0.379969	TRUE	22.4218	7.76388	4.26715e-24	0.0319284	down	2.57422e-23	Surface proteins	TRUE
ITPR3	ITPR3	-0.00393843	1.09553	0.0985752	0.264711	0.892255	0.107745	TRUE	16.8368	10.39	1.10976e-11	0.0418657	down	3.45291e-11	Surface proteins	TRUE
HMGA1	HMGA1	-0.00363244	1.21275	0.0963145	0.529432	0.719711	0.280289	TRUE	18.2178	7.23377	3.46764e-24	0.0372224	down	2.10653e-23	TFs	TRUE
ENPP4	ENPP4	-0.0026205	1.2776	0.0968938	0.478901	0.550704	0.449296	TRUE	35.8895	7.55576	2.18101e-38	0.0647277	up	2.17525e-37	Surface proteins	FALSE
LMBRD1	LMBRD1	-0.00777121	1.44817	0.0940206	0.558528	0.361918	0.638082	TRUE	23.7509	7.95488	6.23705e-24	0.0314798	up	3.73921e-23	Surface proteins	TRUE
MYB	MYB	-0.000443768	1.28965	0.0971583	0.472545	0.594329	0.405671	TRUE	37.4396	7.83163	1.05397e-37	0.0708112	up	1.03573e-36	TFs	TRUE
LRP11	LRP11	-0.00313764	1.65054	0.0935064	0.762108	0.335949	0.664051	TRUE	28.011	4.72578	6.17811e-74	0.127914	up	1.4584e-72	Surface proteins	FALSE
SUN1	SUN1	-0.0106915	1.45202	0.0965439	0.583798	0.411551	0.588449	TRUE	29.5416	6.2611	5.24902e-45	0.0671064	up	6.36846e-44	Surface proteins	FALSE
AHR	AHR	0.0023527	1.23468	0.0984013	0.48674	0.727349	0.272651	TRUE	20.2	6.42545	1.09332e-31	0.0511924	down	8.90131e-31	TFs	FALSE
ITGB8	ITGB8	5.84761e-05	1.2562	0.0963513	0.44164	0.577338	0.422662	TRUE	37.2838	8.38028	1.00287e-32	0.0537507	up	8.44175e-32	Surface proteins	FALSE
ZNF273	ZNF273	-0.00401017	1.40177	0.104009	0.571834	0.484454	0.515546	TRUE	33.7046	5.79455	4.29459e-61	0.144871	up	7.78854e-60	TFs	FALSE
GTF2I	GTF2I	-0.00982778	1.89723	0.0903657	0.797727	0.181899	0.818101	TRUE	17.2084	4.43886	2.12014e-56	0.100376	up	3.40438e-55	TFs	TRUE
SEMA3C	SEMA3C	-0.00128257	1.3229	0.0994526	0.49461	0.545034	0.454966	TRUE	36.094	8.87599	3.5927e-28	0.0415264	up	2.54982e-27	Surface proteins	FALSE
STEAP4	STEAP4	-0.00247539	1.71055	0.0985975	0.909798	0.82333	0.17667	TRUE	25.5273	3.84647	5.63065e-93	0.366435	down	2.05519e-91	Surface proteins	FALSE
ZKSCAN1	ZKSCAN1	-0.00519253	1.61666	0.0947314	0.736192	0.333521	0.666479	TRUE	24.5582	6.42593	1.67169e-36	0.0513388	up	1.5871e-35	TFs	FALSE
MET	MET	0.00216703	1.19895	0.100026	0.490283	0.735177	0.264823	TRUE	21.0647	6.20766	1.25388e-34	0.0590108	down	1.11147e-33	Surface proteins	FALSE
UBA1	UBA1	-0.00118124	1.42304	0.0971828	0.571064	0.422587	0.577413	TRUE	28.4716	8.47622	2.04522e-24	0.0321017	up	1.25649e-23	Surface proteins	FALSE
TIMP1	TIMP1	0.000545838	1.55299	0.0963702	0.889245	0.680189	0.319811	TRUE	24.77	4.52548	2.46528e-71	0.118245	down	5.49126e-70	Surface proteins	FALSE
WDR13	WDR13	-0.0069606	1.52417	0.0930921	0.635773	0.335812	0.664188	TRUE	26.0431	5.4427	1.73508e-52	0.0794013	up	2.57652e-51	Surface proteins	FALSE
PLP2	PLP2	-0.00511439	1.45764	0.0965163	0.559373	0.405947	0.594053	TRUE	28.674	6.54797	4.04319e-40	0.0577339	up	4.23681e-39	Surface proteins	TRUE
TSPAN6	TSPAN6	0.000576697	1.88917	0.0925396	0.809584	0.221438	0.778562	TRUE	16.7363	5.5613	1.46377e-37	0.0587288	up	1.43035e-36	Surface proteins	FALSE
ATP6AP1	ATP6AP1	-0.00166864	1.65716	0.094308	0.644039	0.301712	0.698288	TRUE	23.1715	5.51433	1.4612e-46	0.0692909	up	1.85036e-45	Surface proteins	FALSE
SLC7A2	SLC7A2	-0.000844273	1.42921	0.0987944	0.592241	0.528895	0.471105	TRUE	35.2722	8.07284	5.21248e-33	0.0503794	up	4.43495e-32	Surface proteins	FALSE
HEY1	HEY1	-0.00259519	1.16306	0.101138	0.424509	0.893162	0.106838	TRUE	19.0209	9.00358	9.37867e-16	0.0614125	down	3.84849e-15	TFs	TRUE
RFX3	RFX3	-0.00753695	1.77616	0.0977194	0.714597	0.283771	0.716229	TRUE	27.8361	3.85839	3.66962e-109	0.263617	up	2.09724e-107	TFs	FALSE
KLF9	KLF9	-0.002326	1.09994	0.102754	0.275515	0.888041	0.111959	TRUE	15.8047	11.6027	1.32514e-09	0.0318353	down	3.50214e-09	TFs	TRUE
CTSL	CTSL	-0.0045479	1.28886	0.0979381	0.455283	0.532636	0.467364	TRUE	35.0787	7.7409	1.28193e-35	0.0557052	up	1.17593e-34	Surface proteins	FALSE
AKNA	AKNA	-0.00317074	1.38031	0.0961376	0.529069	0.529741	0.470259	TRUE	34.8226	6.30773	1.57018e-53	0.121583	up	2.39721e-52	TFs	FALSE
DPP7	DPP7	-0.0025281	1.49796	0.097097	0.583289	0.317492	0.682508	TRUE	23.6699	5.84805	2.22645e-42	0.0616001	up	2.50533e-41	Surface proteins	TRUE
CD151	CD151	-0.00357674	1.33557	0.0945078	0.626552	0.57341	0.42659	TRUE	27.4725	7.32379	3.37571e-31	0.0425982	down	2.69777e-30	Surface proteins	FALSE
TEAD1	TEAD1	-0.0029323	1.38727	0.094645	0.568045	0.478007	0.521993	TRUE	32.9957	6.28493	3.19164e-50	0.0855995	up	4.55268e-49	TFs	FALSE
CD59	CD59	1.27036	3.50253	0.913759	0.879085	0.267164	0.732836	TRUE	23.7277	4.28745	5.71727e-76	0.129074	up	1.39511e-74	Surface proteins	FALSE
CD82	CD82	-0.00196339	1.35515	0.0976547	0.708093	0.634091	0.365909	TRUE	25.0513	5.73647	5.98044e-46	0.0674918	down	7.49669e-45	Surface proteins	FALSE
BSCL2	BSCL2	-0.00492303	1.83984	0.0901257	0.792077	0.255033	0.744967	TRUE	24.8296	3.91017	4.13667e-94	0.17487	up	1.61145e-92	Surface proteins	FALSE
PRSS23	PRSS23	-0.000605151	2.04924	0.0990528	1.43385	0.806984	0.193016	TRUE	24.3811	4.67196	1.98292e-63	0.179462	down	3.78584e-62	Surface proteins	FALSE
CTSC	CTSC	-0.00293318	1.90371	0.0947753	1.34067	0.695086	0.304914	TRUE	27.0838	3.92477	5.13093e-102	0.227814	down	2.49008e-100	Surface proteins	FALSE
DYNC2H1	DYNC2H1	-0.00503048	2.18072	0.09721	0.834023	0.200471	0.799529	TRUE	24.9442	3.1358	6.36108e-140	0.393881	up	1.59367e-137	Surface proteins	FALSE
SORL1	SORL1	-0.000919829	1.15827	0.0973308	0.394882	0.868665	0.131335	TRUE	17.7157	9.05794	3.14218e-15	0.0472385	down	1.24526e-14	Surface proteins	FALSE
ZNF487	ZNF487	-0.00596571	1.49564	0.0963257	0.641549	0.443703	0.556297	TRUE	32.2208	5.48406	2.44731e-64	0.126668	up	4.74549e-63	TFs	FALSE
FGFR2	FGFR2	3.41334e-05	1.1563	0.0973099	0.42312	0.823466	0.176534	TRUE	19.9224	6.99143	7.17754e-26	0.0645495	down	4.70576e-25	Surface proteins	FALSE
CD4	CD4	0.00147451	1.39599	0.0948864	0.559104	0.596347	0.403653	TRUE	36.6866	7.22016	6.6805e-44	0.12317	up	7.86362e-43	Surface proteins	FALSE
GPRC5A	GPRC5A	-0.00167381	1.49026	0.095201	0.810362	0.817994	0.182006	TRUE	23.9281	4.78242	5.65065e-59	0.173697	down	9.79785e-58	Surface proteins	FALSE
NR4A1	NR4A1	0.00114924	2.1005	0.0979643	1.19097	0.685491	0.314509	TRUE	23.7977	4.87173	5.53773e-60	0.0945304	down	9.77769e-59	TFs	FALSE
TSPAN8	TSPAN8	0.00332375	2.12044	0.0975012	1.23489	0.808067	0.191933	TRUE	26.5912	3.84763	1.63243e-99	0.424366	down	7.50312e-98	Surface proteins	FALSE
ELK3	ELK3	0.00361026	1.38904	0.0966034	0.567566	0.450571	0.549429	TRUE	32.5364	5.48244	3.3009e-65	0.135974	up	6.51703e-64	TFs	FALSE
GNPTAB	GNPTAB	-0.0020529	1.16187	0.102254	0.396525	0.85098	0.14902	TRUE	21.8585	6.66639	5.99378e-30	0.0908105	down	4.56336e-29	Surface proteins	TRUE
TCTN2	TCTN2	0.000338851	1.28038	0.096412	0.44826	0.585474	0.414526	TRUE	36.512	7.08369	5.34671e-45	0.104641	up	6.47795e-44	Surface proteins	TRUE
ZNF664	ZNF664	-0.00512339	1.48067	0.0957434	0.629594	0.393431	0.606569	TRUE	29.3082	5.64728	1.29512e-54	0.0859455	up	2.02715e-53	TFs	FALSE
ZFHX2	ZFHX2	0.00132913	1.27795	0.0990248	0.449299	0.602106	0.397894	TRUE	36.8953	7.27146	2.22686e-43	0.108072	up	2.58274e-42	TFs	TRUE
TM9SF1	TM9SF1	-0.00194693	1.34728	0.0977758	0.491705	0.535501	0.464499	TRUE	35.7473	9.56457	3.7161e-24	0.0337783	up	2.2496e-23	Surface proteins	TRUE
FOXN3	FOXN3	-0.00495479	1.2446	0.0982985	0.563828	0.741103	0.258897	TRUE	22.7543	5.38975	2.90636e-47	0.0877013	down	3.74593e-46	TFs	FALSE
CASC4	CASC4	-0.0034145	1.35086	0.098399	0.528043	0.450395	0.549605	TRUE	30.8342	7.87813	4.07566e-30	0.041575	up	3.13321e-29	Surface proteins	FALSE
SPPL2A	SPPL2A	0.00103588	1.30056	0.095153	0.477203	0.501365	0.498635	TRUE	33.6663	7.91535	1.34477e-32	0.0476453	up	1.12543e-31	Surface proteins	FALSE
IGF1R	IGF1R	-0.00540845	1.31178	0.0964961	0.484432	0.55005	0.44995	TRUE	36.2633	8.64687	8.60549e-30	0.0450107	up	6.48923e-29	Surface proteins	FALSE
GLYR1	GLYR1	-0.00390338	1.2559	0.101037	0.430668	0.554958	0.445042	TRUE	36.5332	8.92718	3.06217e-28	0.0421411	up	2.17685e-27	TFs	FALSE
ZNF688	ZNF688	-0.00133314	1.34225	0.0978365	0.549	0.526592	0.473408	TRUE	35.0051	7.33985	1.78686e-39	0.0646827	up	1.83915e-38	TFs	FALSE
CES1	CES1	-0.00629292	2.0808	0.0984881	1.02061	0.409094	0.590906	TRUE	31.3631	5.08596	1.42628e-72	0.149976	up	3.25199e-71	Surface proteins	FALSE
TMEM231	TMEM231	0.00196889	2.23448	0.0891789	0.856338	0.179853	0.820147	TRUE	24.6933	3.01498	2.57668e-145	0.49673	up	1.39897e-142	Surface proteins	FALSE
GALNS	GALNS	-0.0016216	1.30983	0.0982728	0.49357	0.550056	0.449944	TRUE	35.4367	6.61549	1.23342e-49	0.108689	up	1.71436e-48	Surface proteins	FALSE
GRN	GRN	0.00586281	1.21025	0.0987688	0.481048	0.729774	0.270226	TRUE	19.3259	6.83598	1.39469e-27	0.0442868	down	9.64623e-27	Surface proteins	FALSE
VEZF1	VEZF1	-0.00654628	1.30566	0.0964807	0.463825	0.507188	0.492812	TRUE	33.9752	9.1961	1.10905e-24	0.0338059	up	6.88165e-24	TFs	FALSE
ABCA5	ABCA5	-0.00176817	1.37433	0.0982933	0.523462	0.496902	0.503098	TRUE	33.497	7.08089	2.62924e-40	0.0630079	up	2.76851e-39	Surface proteins	FALSE
FOXJ1	FOXJ1	-0.00249937	2.69871	0.0960712	0.974728	0.167269	0.832731	TRUE	23.6906	2.85258	1.88764e-149	0.519607	up	7.72367e-146	TFs	FALSE
TGIF1	TGIF1	-0.00613033	1.38803	0.0953718	0.584466	0.449751	0.550249	TRUE	30.5644	8.94557	1.74752e-23	0.0309323	up	1.0334e-22	TFs	TRUE
SPPL2B	SPPL2B	0.00257016	1.26897	0.096208	0.45573	0.567229	0.432771	TRUE	36.8347	8.28409	5.39729e-33	0.0533095	up	4.58321e-32	Surface proteins	TRUE
RFX2	RFX2	-0.00844242	1.75753	0.0941815	0.73929	0.289037	0.710963	TRUE	27.8015	3.9113	3.58203e-106	0.243602	up	1.87452e-104	TFs	FALSE
C3	C3	0.000722353	2.36091	0.0965817	1.49878	0.802849	0.197151	TRUE	26.0943	3.72694	7.07278e-103	0.385168	down	3.53111e-101	Surface proteins	FALSE
PIN1	PIN1	-0.00380949	1.53766	0.0943782	0.65193	0.309779	0.690221	TRUE	23.3007	5.92422	6.99812e-41	0.0591406	up	7.55189e-40	TFs	FALSE
SLC44A2	SLC44A2	-0.00173868	1.18684	0.100088	0.440573	0.728532	0.271468	TRUE	17.9407	7.48198	1.36928e-22	0.0351017	down	7.83075e-22	Surface proteins	FALSE
LDLR	LDLR	0.00122659	1.31745	0.0985632	0.548186	0.816838	0.183162	TRUE	16.5473	9.33491	1.80739e-14	0.032255	down	6.80868e-14	Surface proteins	TRUE
ZNF440	ZNF440	-0.00500496	1.37849	0.0988775	0.560508	0.519287	0.480713	TRUE	34.6256	6.27351	1.18942e-53	0.115606	up	1.82231e-52	TFs	FALSE
ADGRE5	ADGRE5	-0.00129001	1.35731	0.0964342	0.506186	0.528727	0.471273	TRUE	34.8857	7.2461	2.46543e-40	0.0665026	up	2.59917e-39	Surface proteins	FALSE
BST2	BST2	-0.0022881	1.29453	0.101544	0.655586	0.867979	0.132021	TRUE	20.0278	8.88519	4.68495e-17	0.0564939	down	2.07326e-16	Surface proteins	TRUE
CEACAM6	CEACAM6	-0.000667289	2.04891	0.100543	1.27691	0.793978	0.206022	TRUE	26.3084	3.87255	1.37277e-97	0.343359	down	6.08433e-96	Surface proteins	FALSE
BCAM	BCAM	-0.000965204	1.23549	0.0954738	0.516205	0.75165	0.24835	TRUE	19.3705	7.0254	3.88538e-26	0.0459894	down	2.57062e-25	Surface proteins	FALSE
FOSB	FOSB	-0.00248275	1.48851	0.0991152	0.790596	0.715077	0.284923	TRUE	19.3841	6.81496	7.99486e-28	0.0437101	down	5.59189e-27	TFs	FALSE
SLC1A5	SLC1A5	0.00155374	1.19684	0.0992544	0.449309	0.878727	0.121273	TRUE	22.2275	6.70328	1.43287e-29	0.113053	down	1.06936e-28	Surface proteins	FALSE
ZSCAN18	ZSCAN18	-2.75039e-05	1.33127	0.101224	0.478916	0.4701	0.5299	TRUE	32.3415	6.33293	2.37233e-48	0.0785823	up	3.17541e-47	TFs	FALSE
MAFF	MAFF	-0.00106929	1.28407	0.0998591	0.61889	0.816331	0.183669	TRUE	20.2529	7.23472	6.91985e-25	0.0606824	down	4.34027e-24	TFs	TRUE
CELSR1	CELSR1	-0.00205887	1.53608	0.0954962	0.650202	0.347922	0.652078	TRUE	23.8896	7.33007	5.8247e-28	0.0376815	up	4.10707e-27	Surface proteins	FALSE
TTLL10	TTLL10	-0.00400253	1.48032	0.0960753	0.668077	0.435747	0.564253	TRUE	32.8029	5.37091	4.71007e-69	0.18229	up	1.00779e-67	All genes	FALSE
ANKRD65	ANKRD65	-0.00268175	1.41443	0.0941306	0.553205	0.452045	0.547955	TRUE	31.2063	6.89873	2.34681e-39	0.0579894	up	2.40409e-38	All genes	FALSE
CFAP74	CFAP74	0.00212076	1.38865	0.0989757	0.564108	0.452875	0.547125	TRUE	33.0861	5.48435	6.26801e-67	0.177869	up	1.29335e-65	All genes	FALSE
MORN1	MORN1	-0.00181947	1.32547	0.0971636	0.505924	0.541774	0.458226	TRUE	35.206	6.46298	1.02277e-51	0.120697	up	1.50335e-50	All genes	FALSE
CLSTN1	CLSTN1	-0.00300058	1.38234	0.0985788	0.52283	0.404584	0.595416	TRUE	27.6629	7.49417	4.81227e-30	0.040778	up	3.67995e-29	All genes	FALSE
CTNNBIP1	CTNNBIP1	0.00197762	1.11589	0.0990659	0.330242	0.857273	0.142727	TRUE	18.3279	8.6939	8.50308e-17	0.0481446	down	3.71374e-16	All genes	TRUE
AGTRAP	AGTRAP	-0.00410664	1.4337	0.0941441	0.545651	0.415888	0.584112	TRUE	30.2878	5.62604	6.28571e-57	0.0930416	up	1.01873e-55	All genes	FALSE
C1orf158	C1orf158	0.000368755	1.52879	0.0935023	0.599016	0.396462	0.603538	TRUE	31.5917	4.90187	3.09819e-79	0.21263	up	8.28123e-78	All genes	FALSE
FHAD1	FHAD1	-0.00474042	1.87083	0.0938258	0.772039	0.283655	0.716345	TRUE	28.6212	3.93559	1.62979e-108	0.316984	up	9.1342e-107	All genes	FALSE
CROCC	CROCC	0.0030186	1.65731	0.0945972	0.74069	0.418374	0.581626	TRUE	32.0272	5.11831	9.95347e-74	0.17902	up	2.32435e-72	All genes	FALSE
AKR7A2	AKR7A2	-0.00293448	1.64487	0.0950245	0.734493	0.288853	0.711147	TRUE	22.0582	5.83761	2.06452e-40	0.0589449	up	2.18181e-39	All genes	FALSE
MINOS1	MINOS1	0.000692754	1.87323	0.0946638	0.837166	0.254396	0.745604	TRUE	18.6051	5.97847	7.58674e-35	0.0515035	up	6.77349e-34	All genes	FALSE
UBXN10	UBXN10	-0.00108175	1.73936	0.0934519	0.689114	0.311055	0.688945	TRUE	29.2817	4.13968	4.30239e-101	0.280957	up	2.04234e-99	All genes	FALSE
TCEA3	TCEA3	-0.00400654	1.28105	0.0982779	0.572242	0.782494	0.217506	TRUE	24.1027	4.78096	6.62552e-61	0.144409	down	1.19163e-59	All genes	FALSE
GALE	GALE	0.00346083	1.17604	0.096806	0.421509	0.840085	0.159915	TRUE	19.6898	7.88711	5.8971e-21	0.0555603	down	3.14283e-20	All genes	FALSE
STPG1	STPG1	-0.0050193	1.22038	0.100734	0.396947	0.623075	0.376925	TRUE	37.3816	7.57042	7.91981e-41	0.110775	up	8.51478e-40	All genes	TRUE
RCAN3	RCAN3	-0.00167007	1.34497	0.100426	0.516478	0.535779	0.464221	TRUE	35.0794	6.59658	3.72184e-49	0.0978385	up	5.09963e-48	All genes	FALSE
RSRP1	RSRP1	-0.00759769	1.4843	0.0984295	0.581369	0.350289	0.649711	TRUE	23.5026	7.4027	3.82684e-27	0.0364661	up	2.5992e-26	All genes	TRUE
UBXN11	UBXN11	-0.00303107	1.98235	0.0957171	0.746945	0.218008	0.781992	TRUE	25.5069	3.27469	1.49106e-133	0.356216	up	2.27243e-131	All genes	FALSE
SFN	SFN	0.00239492	1.20768	0.0990587	0.658847	0.869547	0.130453	TRUE	21.1529	7.42276	6.94958e-24	0.0859596	down	4.16065e-23	All genes	FALSE
NUDC	NUDC	-0.012071	2.51056	0.0923268	1.0012	0.114425	0.885575	TRUE	16.3991	3.25987	3.28531e-86	0.221945	up	1.00491e-84	All genes	FALSE
SYTL1	SYTL1	-0.000879406	1.55446	0.0939965	0.663081	0.334734	0.665266	TRUE	23.4172	7.01179	6.01838e-30	0.040907	up	4.57808e-29	All genes	FALSE
CD164L2	CD164L2	0.0010963	1.99375	0.093111	0.870171	0.240911	0.759089	TRUE	27.4357	3.6169	4.97323e-121	0.370756	up	4.50025e-119	All genes	FALSE
IFI6	IFI6	-0.00205988	1.73873	0.0937064	0.918767	0.376459	0.623541	TRUE	26.0615	8.29235	1.08094e-23	0.0309504	up	6.44482e-23	All genes	FALSE
ATPIF1	ATPIF1	1.50385	4.01051	1.02271	1.00609	0.259842	0.740158	TRUE	24.513	3.83324	2.08153e-96	0.181283	up	8.86384e-95	All genes	TRUE
TRNAU1AP	TRNAU1AP	-0.00216468	1.34032	0.0981605	0.513588	0.500454	0.499546	TRUE	33.7254	7.05866	7.26217e-41	0.0647018	up	7.8271e-40	All genes	FALSE
DCDC2B	DCDC2B	0.00451208	1.87909	0.0948301	0.751873	0.294089	0.705911	TRUE	29.2379	4.08975	2.69413e-103	0.32648	up	1.36069e-101	All genes	FALSE
MARCKSL1	MARCKSL1	-0.00439395	1.39356	0.0981235	0.77042	0.85045	0.14955	TRUE	25.172	4.32597	2.84716e-73	0.316272	down	6.59554e-72	All genes	FALSE
TEKT2	TEKT2	-0.000249479	1.9518	0.0877637	0.761124	0.249769	0.750231	TRUE	27.5594	3.64613	7.46315e-120	0.368752	up	6.35612e-118	All genes	FALSE
OSCP1	OSCP1	-0.00874447	1.94529	0.0929576	0.753038	0.23735	0.76265	TRUE	26.7269	3.4828	4.55795e-126	0.355998	up	5.27933e-124	All genes	FALSE
MEAF6	MEAF6	-0.00794782	1.66381	0.0965082	0.694721	0.254676	0.745324	TRUE	18.3585	6.00266	2.40167e-34	0.0507949	up	2.11595e-33	All genes	FALSE
DNALI1	DNALI1	-0.00410919	2.47559	0.0949756	1.01557	0.172892	0.827108	TRUE	23.3817	2.92712	9.19243e-145	0.404514	up	4.69733e-142	All genes	FALSE
MYCBP	MYCBP	-0.00379294	2.02316	0.0925172	0.918571	0.209215	0.790785	TRUE	22.421	3.71858	1.67046e-93	0.176461	up	6.30927e-92	All genes	FALSE
MACF1	MACF1	7.02727e-05	1.4259	0.0976577	0.578773	0.38427	0.61573	TRUE	27.3122	6.72534	1.68294e-36	0.0512283	up	1.59429e-35	All genes	FALSE
ZMYND12	ZMYND12	-0.00227887	1.41596	0.0975572	0.575047	0.498354	0.501646	TRUE	33.9856	5.97408	6.53082e-58	0.127816	up	1.09102e-56	All genes	FALSE
CCDC30	CCDC30	-0.00603939	1.5326	0.0971115	0.624586	0.365406	0.634594	TRUE	30.3413	4.58108	3.41214e-86	0.201437	up	1.04004e-84	All genes	FALSE
FAM183A	FAM183A	-0.00208604	3.67285	0.0935732	1.17316	0.130481	0.869519	TRUE	21.3387	2.71952	4.47397e-116	0.685847	up	3.32183e-114	All genes	FALSE
EBNA1BP2	EBNA1BP2	0.00215398	1.33026	0.095947	0.521491	0.47197	0.52803	TRUE	32.0879	8.11146	1.32478e-29	0.0412416	up	9.89541e-29	All genes	FALSE
CFAP57	CFAP57	-0.00444275	1.51096	0.0938149	0.613916	0.380936	0.619064	TRUE	31.3245	4.793	4.58579e-82	0.22773	up	1.26869e-80	All genes	FALSE
CCDC24	CCDC24	-0.00397003	1.46326	0.094237	0.591307	0.392506	0.607494	TRUE	29.559	5.30826	3.12321e-62	0.103565	up	5.84726e-61	All genes	FALSE
C1orf228	C1orf228	-0.00095332	1.31655	0.1011	0.536986	0.609019	0.390981	TRUE	36.893	7.50119	3.08485e-41	0.135519	up	3.36237e-40	All genes	FALSE
TCTEX1D4	TCTEX1D4	-0.00163508	2.12048	0.097589	0.955787	0.251707	0.748293	TRUE	27.5339	3.66817	1.48371e-118	0.336001	up	1.20458e-116	All genes	FALSE
PDZK1IP1	PDZK1IP1	-0.00170973	1.23271	0.0973214	0.696407	0.811192	0.188808	TRUE	21.7985	6.21512	2.53004e-34	0.0877979	down	2.22454e-33	All genes	FALSE
SPATA6	SPATA6	-0.00414843	1.44786	0.0933649	0.598707	0.411166	0.588834	TRUE	30.9207	5.16497	4.13738e-69	0.1302	up	8.8964e-68	All genes	FALSE
AGBL4	AGBL4	-0.00330952	1.27664	0.0964084	0.458431	0.592241	0.407759	TRUE	36.5966	7.12451	8.93808e-45	0.114171	up	1.07542e-43	All genes	FALSE
HSPB11	HSPB11	-0.0118883	2.29829	0.0883507	0.957526	0.172743	0.827257	TRUE	19.5881	3.60245	1.51625e-87	0.175064	up	4.91478e-86	All genes	FALSE
LDLRAD1	LDLRAD1	-0.00233082	2.44503	0.100606	0.967515	0.19794	0.80206	TRUE	25.8627	3.24211	4.62758e-136	0.487104	up	8.37496e-134	All genes	FALSE
TMEM59	TMEM59	1.59378	3.39516	1.01908	0.77307	0.280085	0.719915	TRUE	17.2174	5.63341	3.1209e-37	0.0574463	up	3.00902e-36	All genes	TRUE
SSBP3	SSBP3	-0.000792974	1.35877	0.0968354	0.519369	0.511176	0.488824	TRUE	34.1901	7.31116	1.02165e-38	0.0608623	up	1.02959e-37	All genes	FALSE
C1orf168	C1orf168	-0.00140415	1.49566	0.0949275	0.627005	0.446579	0.553421	TRUE	30.4619	8.52211	1.193e-25	0.0342817	up	7.73979e-25	All genes	FALSE
CYP2J2	CYP2J2	-0.000920064	1.20261	0.0960916	0.531451	0.804996	0.195004	TRUE	21.6917	6.33013	2.57991e-33	0.079148	down	2.20587e-32	All genes	TRUE
C1orf87	C1orf87	-0.00705599	1.66453	0.0944494	0.656616	0.325758	0.674242	TRUE	29.6595	4.26064	5.2253e-97	0.263822	up	2.28102e-95	All genes	FALSE
TCTEX1D1	TCTEX1D1	0.00371837	1.56478	0.0948426	0.615789	0.369678	0.630322	TRUE	31.0334	4.68735	7.74963e-85	0.238137	up	2.29765e-83	All genes	FALSE
WDR78	WDR78	0.0038036	1.91548	0.0941222	0.784543	0.258407	0.741593	TRUE	28.0637	3.7716	6.73226e-115	0.356711	up	4.75473e-113	All genes	FALSE
C1orf141	C1orf141	-0.00411369	1.50269	0.0987145	0.648699	0.452545	0.547455	TRUE	33.0846	5.48742	7.88383e-67	0.175578	up	1.61525e-65	All genes	FALSE
WLS	WLS	-0.00395753	1.48142	0.0958121	0.595285	0.37401	0.62599	TRUE	28.4713	5.32649	1.76316e-59	0.0950158	up	3.09426e-58	All genes	FALSE
ERICH3	ERICH3	-0.00813861	2.25654	0.0945667	0.872002	0.208144	0.791856	TRUE	26.2387	3.32336	6.6282e-133	0.466415	up	9.92745e-131	All genes	FALSE
PTGFR	PTGFR	-0.00136595	1.23848	0.0992685	0.453195	0.888105	0.111895	TRUE	21.8511	6.62238	2.62251e-29	0.121663	down	1.93557e-28	All genes	TRUE
TTLL7	TTLL7	-0.00067132	1.27583	0.0959105	0.451894	0.605829	0.394171	TRUE	36.8796	7.30159	3.74082e-43	0.117276	up	4.29281e-42	All genes	FALSE
WDR63	WDR63	-0.00113963	1.48575	0.0988518	0.604985	0.397169	0.602831	TRUE	31.6261	4.92406	1.35207e-78	0.206502	up	3.54846e-77	All genes	FALSE
DDAH1	DDAH1	-0.00310022	1.28784	0.0982064	0.453743	0.544596	0.455404	TRUE	35.7096	7.89749	5.94938e-35	0.0554758	up	5.33908e-34	All genes	FALSE
GCLM	GCLM	-0.00573712	1.42882	0.0972994	0.581429	0.422418	0.577582	TRUE	29.8707	6.61983	7.84713e-41	0.0596402	up	8.44709e-40	All genes	FALSE
ARHGAP29	ARHGAP29	0.00331986	1.07454	0.100203	0.252386	0.898702	0.101298	TRUE	16.678	11.6313	1.00742e-09	0.0358534	down	2.68284e-09	All genes	TRUE
RP11-57H12.3	RP11-57H12.3	-0.00651328	1.22915	0.0972983	0.410986	0.633695	0.366305	TRUE	37.5574	7.74292	2.15618e-39	0.115314	up	2.21142e-38	All genes	TRUE
PALMD	PALMD	-0.00490929	1.39467	0.0992617	0.552642	0.50024	0.49976	TRUE	34.0924	5.95125	9.65288e-59	0.141168	up	1.65592e-57	All genes	FALSE
C1orf194	C1orf194	-0.00563545	3.70379	0.100834	1.18531	0.146305	0.853695	TRUE	22.4599	2.70223	7.78187e-142	0.615671	up	2.93918e-139	All genes	FALSE
KIAA1324	KIAA1324	-0.00708844	1.30399	0.0968129	0.606364	0.696086	0.303914	TRUE	22.5977	5.38279	1.10412e-47	0.0746161	down	1.44016e-46	All genes	TRUE
DRAM2	DRAM2	-0.0105093	1.41269	0.0963401	0.579414	0.428382	0.571618	TRUE	30.0605	6.92258	1.11622e-37	0.0541235	up	1.09442e-36	All genes	FALSE
PIFO	PIFO	-0.0152087	3.39937	0.0906435	1.13369	0.13031	0.86969	TRUE	21.3549	2.70184	7.39979e-119	0.676176	up	6.06434e-117	All genes	FALSE
RHOC	RHOC	-0.000690389	1.30741	0.0970271	0.595716	0.706664	0.293336	TRUE	22.9493	5.26285	3.04203e-50	0.0819233	down	4.3464e-49	All genes	FALSE
PHTF1	PHTF1	-0.00732952	1.36835	0.0970643	0.566564	0.523827	0.476173	TRUE	34.775	6.34957	1.25657e-52	0.112379	up	1.8788e-51	All genes	FALSE
HIPK1	HIPK1	-0.00447462	1.6806	0.0947279	0.705824	0.301697	0.698303	TRUE	27.2408	4.13747	4.88317e-93	0.179965	up	1.79746e-91	All genes	FALSE
RP4-666F24.3	RP4-666F24.3	-0.00612524	1.86143	0.094088	0.80725	0.326911	0.673089	TRUE	29.759	4.29631	8.34793e-96	0.25756	up	3.43689e-94	All genes	FALSE
FAM46C	FAM46C	0.00226957	1.31381	0.0967913	0.623055	0.831814	0.168186	TRUE	23.5719	5.26564	6.2796e-49	0.148558	down	8.52357e-48	All genes	FALSE
SPAG17	SPAG17	0.000170462	2.1699	0.0952388	0.820078	0.205067	0.794933	TRUE	25.9777	3.26708	1.88364e-135	0.464135	up	3.20846e-133	All genes	FALSE
PDE4DIP	PDE4DIP	-0.00312411	1.60686	0.0960114	0.667898	0.306022	0.693978	TRUE	25.8939	4.63074	3.79555e-71	0.117718	up	8.43272e-70	All genes	FALSE
HIST2H2AA4	HIST2H2AA4	-0.00141619	1.57852	0.0951488	0.702143	0.507374	0.492626	TRUE	34.2444	7.55361	2.24163e-36	0.0558894	up	2.11434e-35	All genes	TRUE
GOLPH3L	GOLPH3L	0.00222434	1.27307	0.0974232	0.459422	0.548536	0.451464	TRUE	36.7898	10.2712	9.11969e-22	0.0301228	up	5.0557e-21	All genes	TRUE
CTSS	CTSS	-0.0010733	2.23073	0.0911738	0.899276	0.164754	0.835246	TRUE	21.0107	3.17109	2.08081e-114	0.257462	up	1.45774e-112	All genes	FALSE
PSMD4	PSMD4	0.000374484	1.45099	0.0966297	0.587637	0.401275	0.598725	TRUE	26.9329	8.33408	4.43703e-24	0.0315254	up	2.67484e-23	All genes	FALSE
RIIAD1	RIIAD1	0.00150861	1.83822	0.0947699	0.822689	0.316596	0.683404	TRUE	29.6195	4.24019	8.81153e-98	0.270786	up	3.94566e-96	All genes	FALSE
S100A10	S100A10	-0.00188116	2.48472	0.095078	1.16345	0.17765	0.82235	TRUE	17.9949	4.2103	1.95087e-63	0.115296	up	3.73286e-62	All genes	TRUE
S100A16	S100A16	-0.000693651	1.42012	0.098806	0.732735	0.845357	0.154643	TRUE	24.6344	3.93428	1.70011e-83	0.358306	down	4.8742e-82	All genes	FALSE
S100A14	S100A14	-0.00363038	1.69811	0.0979909	0.959362	0.828756	0.171244	TRUE	25.4719	3.78152	4.23476e-95	0.404211	down	1.70312e-93	All genes	FALSE
C1orf189	C1orf189	-0.00244614	2.01174	0.0950851	1.00805	0.366172	0.633828	TRUE	30.7829	4.6687	1.58863e-84	0.209901	up	4.6781e-83	All genes	FALSE
RP11-263K19.4	RP11-263K19.4	0.00123221	1.3129	0.0960053	0.524543	0.577905	0.422095	TRUE	36.4332	7.05274	3.05349e-45	0.103303	up	3.72551e-44	All genes	TRUE
RUSC1	RUSC1	-0.0028432	1.05735	0.0991499	0.199099	0.892675	0.107325	TRUE	16.6339	11.8595	1.54275e-09	0.0328879	down	4.05747e-09	All genes	TRUE
HDGF	HDGF	-0.00837469	1.50312	0.0969487	0.657295	0.367768	0.632232	TRUE	27.198	6.20579	2.0844e-42	0.0612857	up	2.34853e-41	All genes	FALSE
LRRC71	LRRC71	0.000413897	1.57486	0.099252	0.637253	0.393481	0.606519	TRUE	31.5913	4.89014	1.17607e-79	0.220089	up	3.17283e-78	All genes	FALSE
IFI16	IFI16	-0.00203434	1.19407	0.0982302	0.416983	0.79253	0.20747	TRUE	17.2389	8.51748	2.17029e-17	0.0342262	down	9.74836e-17	All genes	TRUE
DUSP23	DUSP23	-0.00532267	1.22338	0.0930245	0.687999	0.655407	0.344593	TRUE	19.68	7.35393	1.18752e-24	0.0334668	down	7.36332e-24	All genes	FALSE
CFAP45	CFAP45	0.00205767	1.85239	0.0926253	0.77177	0.270706	0.729294	TRUE	27.9494	3.79076	2.00929e-113	0.308503	up	1.35308e-111	All genes	FALSE
TSTD1	TSTD1	1.44428	3.32332	0.954282	0.762826	0.400737	0.599263	TRUE	27.5747	4.78916	6.89419e-71	0.119266	up	1.52005e-69	All genes	TRUE
KLHDC9	KLHDC9	-0.00116385	1.38639	0.0976144	0.583391	0.479228	0.520772	TRUE	33.4072	5.79283	2.85266e-60	0.127457	up	5.0677e-59	All genes	FALSE
PPOX	PPOX	-0.00721642	1.54072	0.0941307	0.682674	0.350541	0.649459	TRUE	29.4992	4.52316	2.13525e-85	0.175884	up	6.41831e-84	All genes	FALSE
CFAP126	CFAP126	0.000200897	2.35115	0.0982728	0.891409	0.225893	0.774107	TRUE	26.356	3.37816	7.24003e-131	0.38949	up	9.8272e-129	All genes	FALSE
CCDC190	CCDC190	-0.000417842	1.72408	0.0968869	0.72041	0.59019	0.40981	TRUE	36.41	7.13713	1.16826e-44	0.136373	up	1.39982e-43	All genes	FALSE
NME7	NME7	-0.0067245	1.53579	0.0950276	0.643283	0.339043	0.660957	TRUE	28.7827	4.4347	2.5543e-86	0.170072	up	7.86852e-85	All genes	FALSE
CCDC181	CCDC181	-0.00251057	1.45853	0.0957219	0.617337	0.464651	0.535349	TRUE	33.2261	5.58074	8.40435e-65	0.157689	up	1.64434e-63	All genes	FALSE
KIFAP3	KIFAP3	-0.00712165	1.38829	0.0985677	0.524529	0.45908	0.54092	TRUE	32.1009	6.02564	6.08204e-53	0.0891348	up	9.15679e-52	All genes	FALSE
FMO2	FMO2	-0.00352767	1.70554	0.100738	1.03893	0.808188	0.191812	TRUE	25.059	4.22117	3.33552e-78	0.24373	down	8.70139e-77	All genes	FALSE
ANKRD45	ANKRD45	-0.000551543	1.22047	0.0993351	0.422924	0.628421	0.371579	TRUE	37.5138	7.67161	5.42284e-40	0.112082	up	5.65859e-39	All genes	TRUE
RABGAP1L	RABGAP1L	-0.00503035	1.38725	0.0987372	0.556925	0.445836	0.554164	TRUE	30.7224	7.49625	5.23207e-33	0.0463767	up	4.44726e-32	All genes	FALSE
SOAT1	SOAT1	0.000256881	1.31342	0.0984836	0.472573	0.539021	0.460979	TRUE	35.2005	6.93105	1.35606e-44	0.0804172	up	1.62261e-43	All genes	FALSE
APOBEC4	APOBEC4	-0.00209132	1.42999	0.0959194	0.620819	0.510313	0.489687	TRUE	34.551	6.1292	1.87782e-56	0.14863	up	3.02646e-55	All genes	FALSE
TRMT1L	TRMT1L	-0.00289057	1.27598	0.0978845	0.448871	0.590144	0.409856	TRUE	37.4158	7.98793	3.50944e-36	0.0647438	up	3.27812e-35	All genes	TRUE
CYB5R1	CYB5R1	0.000118211	1.39461	0.0959769	0.557245	0.441783	0.558217	TRUE	30.3947	7.64161	1.71638e-31	0.0436958	up	1.39217e-30	All genes	FALSE
SERTAD4-AS1	SERTAD4-AS1	-0.00111113	1.36057	0.0967177	0.532271	0.553863	0.446137	TRUE	36.1482	7.79535	2.1911e-36	0.0601382	up	2.06893e-35	All genes	FALSE
RP11-122M14.1	RP11-122M14.1	-0.00104822	1.29289	0.0975882	0.458097	0.591338	0.408662	TRUE	36.4369	7.08222	3.14537e-45	0.126055	up	3.82686e-44	All genes	FALSE
SMYD2	SMYD2	-0.0132453	1.55187	0.0942759	0.679974	0.40147	0.59853	TRUE	30.436	5.24906	1.07865e-65	0.116064	up	2.16403e-64	All genes	FALSE
SPATA17	SPATA17	0.00315299	1.69791	0.0967052	0.673828	0.310467	0.689533	TRUE	29.0755	4.11099	1.33463e-101	0.267024	up	6.4055e-100	All genes	FALSE
IARS2	IARS2	-0.000710467	1.35253	0.0992333	0.52221	0.486325	0.513675	TRUE	32.8689	8.57541	2.90175e-27	0.0376538	up	1.98172e-26	All genes	FALSE
SUSD4	SUSD4	1.83137e-05	1.09502	0.101304	0.291063	0.888711	0.111289	TRUE	16.8382	10.3146	7.40942e-12	0.0413359	down	2.33209e-11	All genes	FALSE
CAPN8	CAPN8	-0.000151743	1.25878	0.101719	0.464618	0.879073	0.120927	TRUE	24.4189	4.53667	2.43507e-63	0.310688	down	4.61866e-62	All genes	FALSE
ENAH	ENAH	-0.00747303	1.52626	0.0928723	0.63419	0.39701	0.60299	TRUE	29.0127	5.91954	2.55748e-49	0.0748877	up	3.53209e-48	All genes	FALSE
PYCR2	PYCR2	-0.0017354	1.37049	0.0957495	0.535095	0.469156	0.530844	TRUE	32.3858	6.53877	1.88856e-45	0.0720394	up	2.3205e-44	All genes	FALSE
EFCAB2	EFCAB2	-0.00495833	1.71279	0.0924037	0.729307	0.300946	0.699054	TRUE	27.6313	4.08369	6.0453e-97	0.197496	up	2.62578e-95	All genes	FALSE
SCCPDH	SCCPDH	-0.00409028	1.49643	0.095344	0.571051	0.346424	0.653576	TRUE	26.0216	5.67197	1.80218e-48	0.0719549	up	2.41598e-47	All genes	FALSE
ADI1	ADI1	-0.00523742	1.33841	0.0978987	0.598813	0.563667	0.436333	TRUE	27.7551	7.90122	2.87828e-27	0.0364318	down	1.96724e-26	All genes	FALSE
ASAP2	ASAP2	0.000850102	1.09536	0.0989687	0.274996	0.889603	0.110397	TRUE	16.5398	11.9742	2.21951e-09	0.0314158	down	5.76755e-09	All genes	TRUE
WDR35	WDR35	-0.000538454	1.26346	0.0977332	0.46814	0.54791	0.45209	TRUE	35.4538	6.65561	5.12846e-49	0.104249	up	6.97198e-48	All genes	FALSE
SDC1	SDC1	0.000438674	1.24411	0.0971794	0.562427	0.862677	0.137323	TRUE	23.4934	5.02402	1.49423e-51	0.198843	down	2.18158e-50	All genes	FALSE
DRC1	DRC1	-0.00616175	1.86969	0.0933346	0.747675	0.278969	0.721031	TRUE	28.3784	3.87426	1.01169e-110	0.319986	up	6.06104e-109	All genes	FALSE
MAPRE3	MAPRE3	0.000701345	1.57351	0.0967372	0.633057	0.322982	0.677018	TRUE	28.8066	4.20339	4.14322e-96	0.213898	up	1.73875e-94	All genes	FALSE
IFT172	IFT172	-0.00327597	1.7435	0.0904901	0.764333	0.270411	0.729589	TRUE	26.2542	3.90105	4.04227e-100	0.197414	up	1.89812e-98	All genes	FALSE
RBKS	RBKS	-0.00350369	1.28791	0.100256	0.455621	0.551852	0.448148	TRUE	35.499	6.70865	2.8248e-48	0.100098	up	3.76943e-47	All genes	FALSE
FAM179A	FAM179A	-0.00173591	1.64596	0.0935534	0.66964	0.336478	0.663522	TRUE	30.3724	4.44765	9.01021e-92	0.274464	up	3.22106e-90	All genes	FALSE
SRD5A2	SRD5A2	-0.000571225	1.29018	0.0978508	0.531311	0.620141	0.379859	TRUE	37.1765	7.69559	1.35768e-39	0.132142	up	1.4024e-38	All genes	FALSE
DPY30	DPY30	-0.00143347	2.13345	0.0859478	0.943036	0.179305	0.820695	TRUE	18.932	3.97182	1.62068e-72	0.135073	up	3.68557e-71	All genes	FALSE
CDC42EP3	CDC42EP3	-0.00418446	1.32389	0.0966845	0.518948	0.544692	0.455308	TRUE	35.7517	7.73137	1.67486e-36	0.0593244	up	1.58837e-35	All genes	FALSE
MORN2	MORN2	-0.00986308	3.18654	0.0869345	1.26518	0.126015	0.873985	TRUE	20.3793	2.67652	4.84466e-134	0.439514	up	7.51528e-132	All genes	FALSE
DYNC2LI1	DYNC2LI1	0.000139512	1.6132	0.0919979	0.693641	0.314244	0.685756	TRUE	27.5775	4.32562	1.82735e-86	0.161103	up	5.66936e-85	All genes	FALSE
C2orf73	C2orf73	-0.000454855	1.50711	0.0967727	0.670701	0.41086	0.58914	TRUE	32.3127	5.15531	1.03502e-73	0.208361	up	2.40408e-72	All genes	FALSE
SPTBN1	SPTBN1	-0.00312446	1.84637	0.0886877	0.767609	0.217184	0.782816	TRUE	20.7893	4.22366	5.61205e-70	0.121088	up	1.22492e-68	All genes	FALSE
CFAP36	CFAP36	-0.00181073	1.67859	0.0933083	0.774165	0.324866	0.675134	TRUE	27.8127	4.50775	1.70183e-80	0.144784	up	4.61995e-79	All genes	FALSE
PPP4R3B	PPP4R3B	-0.00717509	1.46229	0.0963005	0.600426	0.389456	0.610544	TRUE	28.7243	5.90268	4.08628e-49	0.0742406	up	5.59015e-48	All genes	FALSE
KIAA1841	KIAA1841	-0.00482632	1.39407	0.0965231	0.552834	0.471804	0.528196	TRUE	32.8715	5.90689	1.13409e-56	0.104475	up	1.83461e-55	All genes	FALSE
AHSA2	AHSA2	-0.00733706	1.32533	0.0998228	0.539564	0.568193	0.431807	TRUE	37.3977	8.84828	1.61626e-29	0.0461181	up	1.20106e-28	All genes	TRUE
FAM161A	FAM161A	0.00047538	1.28089	0.100348	0.476519	0.586142	0.413858	TRUE	36.6615	7.17542	5.21647e-44	0.0983518	up	6.157e-43	All genes	FALSE
ALMS1	ALMS1	0.000493843	1.33997	0.0963793	0.507578	0.518738	0.481262	TRUE	34.4303	6.5583	1.59569e-48	0.0885556	up	2.14578e-47	All genes	FALSE
C2orf81	C2orf81	-0.000189708	1.3393	0.0960002	0.500704	0.525673	0.474327	TRUE	34.7502	6.22269	3.97456e-55	0.14321	up	6.27764e-54	All genes	FALSE
WDR54	WDR54	0.000569126	2.55869	0.0960987	0.955051	0.159112	0.840888	TRUE	22.9635	2.78898	1.21496e-149	0.483095	up	7.72367e-146	All genes	FALSE
WBP1	WBP1	-0.00503512	1.42999	0.0992941	0.556082	0.379055	0.620945	TRUE	26.2995	7.09173	5.52122e-32	0.0438142	up	4.53335e-31	All genes	FALSE
DNAH6	DNAH6	-0.000925711	2.00572	0.0926709	0.787213	0.221154	0.778846	TRUE	26.3705	3.37432	3.9808e-131	0.39796	up	5.57761e-129	All genes	FALSE
CAPG	CAPG	0.000272714	1.1894	0.0983499	0.444162	0.825858	0.174142	TRUE	16.642	9.25219	1.18459e-14	0.0340716	down	4.51936e-14	All genes	FALSE
TEKT4	TEKT4	-0.00183764	1.49802	0.0928006	0.660386	0.431262	0.568738	TRUE	32.619	5.29452	1.35707e-70	0.187839	up	2.98451e-69	All genes	FALSE
VWA3B	VWA3B	-0.00298302	1.88138	0.0949685	0.76263	0.264477	0.735523	TRUE	28.1552	3.79897	8.37129e-114	0.347538	up	5.77154e-112	All genes	FALSE
KIAA1211L	KIAA1211L	-0.0045146	1.56181	0.0974392	0.693942	0.414153	0.585847	TRUE	31.4798	5.11412	4.26886e-72	0.149885	up	9.63211e-71	All genes	FALSE
TSGA10	TSGA10	0.00130544	1.51587	0.096938	0.605983	0.369598	0.630402	TRUE	29.3233	4.77529	4.29029e-76	0.140171	up	1.0558e-74	All genes	FALSE
TBC1D8	TBC1D8	-0.00600865	1.53286	0.0919248	0.621157	0.36626	0.63374	TRUE	28.6355	5.03704	9.46851e-67	0.111865	up	1.93053e-65	All genes	FALSE
C2orf40	C2orf40	0.00335861	3.25149	0.0935306	1.31189	0.204792	0.795208	TRUE	25.3568	3.18102	6.17159e-139	0.410103	up	1.41086e-136	All genes	FALSE
GCC2	GCC2	-0.0128677	1.80891	0.0942944	0.77083	0.204571	0.795429	TRUE	20.3936	4.10942	2.31492e-72	0.128179	up	5.2369e-71	All genes	FALSE
LIMS1	LIMS1	-0.00243636	1.4466	0.0949192	0.618941	0.441433	0.558567	TRUE	31.1191	6.64751	3.47266e-42	0.0632786	up	3.87751e-41	All genes	FALSE
CCDC138	CCDC138	0.00176348	1.2532	0.098286	0.444472	0.608474	0.391526	TRUE	37.6223	7.71631	3.41879e-39	0.081359	up	3.48172e-38	All genes	TRUE
MALL	MALL	0.00107093	1.21607	0.101669	0.563198	0.844477	0.155523	TRUE	23.447	5.56331	8.07085e-44	0.142518	down	9.44899e-43	All genes	FALSE
NPHP1	NPHP1	-0.00451222	1.71769	0.0936606	0.697246	0.295937	0.704063	TRUE	28.3115	3.96012	7.04955e-106	0.259741	up	3.66703e-104	All genes	FALSE
CHCHD5	CHCHD5	-0.000802548	1.58588	0.0935557	0.673288	0.330034	0.669966	TRUE	21.6797	7.66969	3.93181e-24	0.0321262	up	2.37522e-23	All genes	FALSE
RABL2A	RABL2A	0.000699262	1.80055	0.0975653	0.721381	0.269056	0.730944	TRUE	27.1993	3.72655	1.36336e-113	0.270677	up	9.32559e-112	All genes	FALSE
STEAP3	STEAP3	-0.00274053	1.31443	0.099562	0.530614	0.561841	0.438159	TRUE	37.3109	9.22426	3.75795e-27	0.0408039	up	2.55641e-26	All genes	FALSE
CFAP221	CFAP221	-0.00063145	1.93762	0.0942833	0.743347	0.240038	0.759962	TRUE	26.7512	3.48913	8.68213e-126	0.354563	up	9.79502e-124	All genes	FALSE
CCDC74B	CCDC74B	-0.00556993	1.78469	0.0895996	0.765247	0.323284	0.676716	TRUE	29.8127	4.29502	4.3054e-96	0.268139	up	1.79813e-94	All genes	FALSE
CCDC74A	CCDC74A	-0.00659489	2.02927	0.0996532	0.893299	0.239073	0.760927	TRUE	26.6651	3.51759	1.29e-123	0.323966	up	1.28807e-121	All genes	FALSE
MAP3K19	MAP3K19	-0.00253536	1.53196	0.0936305	0.630858	0.384589	0.615411	TRUE	31.4595	4.83851	5.78705e-81	0.22629	up	1.58088e-79	All genes	FALSE
HNMT	HNMT	-0.00541425	1.35686	0.0961271	0.684043	0.59615	0.40385	TRUE	26.7832	6.29274	9.56476e-41	0.0583473	down	1.02326e-39	All genes	FALSE
STAM2	STAM2	-0.00161756	1.23042	0.100659	0.424715	0.57608	0.42392	TRUE	37.457	8.86171	1.74033e-29	0.0461478	up	1.28995e-28	All genes	TRUE
TTC21B	TTC21B	-0.00426636	1.35224	0.0982243	0.526328	0.494851	0.505149	TRUE	33.7898	5.95567	8.83193e-58	0.121443	up	1.46139e-56	All genes	FALSE
CCDC173	CCDC173	-0.00694129	1.89014	0.0962056	0.767212	0.278358	0.721642	TRUE	28.1107	3.83991	2.01125e-111	0.298797	up	1.23913e-109	All genes	FALSE
AC007405.6	AC007405.6	-0.00434434	1.49708	0.092455	0.670768	0.472812	0.527188	TRUE	33.381	5.72413	9.32153e-62	0.136657	up	1.7156e-60	All genes	FALSE
CIR1	CIR1	-0.00651371	1.62702	0.092995	0.70525	0.281511	0.718489	TRUE	22.8637	5.2713	3.81402e-50	0.0761094	up	5.40496e-49	All genes	FALSE
TTC30B	TTC30B	0.00181429	1.33513	0.0954027	0.53496	0.563971	0.436029	TRUE	35.9071	6.77737	2.62482e-48	0.121499	up	3.50797e-47	All genes	FALSE
OSBPL6	OSBPL6	-0.00254951	1.61097	0.0922105	0.662886	0.378494	0.621506	TRUE	30.9834	4.71855	1.95542e-83	0.212256	up	5.56943e-82	All genes	FALSE
CERKL	CERKL	-0.00265105	1.26947	0.0956377	0.457427	0.578201	0.421799	TRUE	36.1225	6.90043	4.55408e-47	0.126681	up	5.835e-46	All genes	FALSE
DNAJC10	DNAJC10	-0.00178847	1.4493	0.0983692	0.58594	0.37137	0.62863	TRUE	27.9877	5.59761	4.15956e-53	0.0814012	up	6.30613e-52	All genes	FALSE
MFSD6	MFSD6	-0.00535782	1.39215	0.0963924	0.542393	0.48506	0.51494	TRUE	32.8801	7.61211	2.67238e-34	0.0501012	up	2.34494e-33	All genes	FALSE
SDPR	SDPR	0.00256471	1.25958	0.0987545	0.650221	0.817623	0.182377	TRUE	20.1759	7.04072	7.23186e-26	0.0648858	down	4.7378e-25	All genes	TRUE
DNAH7	DNAH7	0.000453179	1.88076	0.0955607	0.734001	0.275038	0.724962	TRUE	28.4271	3.87364	6.16609e-111	0.33484	up	3.71978e-109	All genes	FALSE
STK17B	STK17B	0.00020553	1.16173	0.0986044	0.401206	0.805819	0.194181	TRUE	19.9015	7.16184	3.11423e-25	0.0560346	down	1.98048e-24	All genes	FALSE
AC013264.2	AC013264.2	-0.00360336	2.53847	0.0938399	1.00496	0.216927	0.783073	TRUE	26.0166	3.30366	4.80518e-134	0.402019	up	7.51528e-132	All genes	FALSE
SPATS2L	SPATS2L	-0.000656866	1.68935	0.0933652	0.783988	0.319008	0.680992	TRUE	24.5633	5.76838	9.37819e-45	0.0654799	up	1.12681e-43	All genes	FALSE
CFLAR	CFLAR	0.000709569	1.67814	0.0904553	0.732535	0.283171	0.716829	TRUE	20.3478	6.26697	1.1767e-33	0.048182	up	1.01509e-32	All genes	FALSE
ALS2CR12	ALS2CR12	-0.00266977	1.24206	0.095404	0.43493	0.62253	0.37747	TRUE	37.3241	7.57578	9.14824e-41	0.115363	up	9.81121e-40	All genes	FALSE
KIAA2012	KIAA2012	-0.00599253	1.4318	0.098657	0.608724	0.510283	0.489717	TRUE	34.8571	6.3725	2.08747e-53	0.203071	up	3.17581e-52	All genes	FALSE
ICA1L	ICA1L	0.000917363	1.29053	0.0988288	0.452001	0.604722	0.395278	TRUE	36.8886	7.28902	2.9123e-43	0.114139	up	3.36425e-42	All genes	FALSE
ABI2	ABI2	0.000710003	1.33706	0.0998738	0.507433	0.500723	0.499277	TRUE	33.7908	6.68471	1.22812e-45	0.0765139	up	1.51975e-44	All genes	FALSE
MDH1B	MDH1B	-0.00483323	1.55823	0.0929406	0.62081	0.362604	0.637396	TRUE	30.767	4.61063	1.01727e-86	0.235453	up	3.20181e-85	All genes	FALSE
IDH1	IDH1	-0.00177565	1.2468	0.0968182	0.55385	0.723363	0.276637	TRUE	21.798	5.77727	1.71695e-40	0.0678239	down	1.81892e-39	All genes	FALSE
SPAG16	SPAG16	0.00378178	2.11942	0.0971205	0.875139	0.157259	0.842741	TRUE	20.3629	3.19263	1.22474e-109	0.246751	up	7.09289e-108	All genes	FALSE
IGFBP2	IGFBP2	-0.00213749	3.2241	0.0927391	1.2082	0.151407	0.848593	TRUE	19.884	3.07784	1.0812e-112	0.269827	up	7.11541e-111	All genes	TRUE
IGFBP5	IGFBP5	-0.00521073	1.92527	0.0961742	0.835154	0.298311	0.701689	TRUE	27.4614	4.05449	1.24212e-97	0.198266	up	5.5335e-96	All genes	FALSE
CATIP	CATIP	0.00123698	1.51677	0.0951524	0.616307	0.422613	0.577387	TRUE	32.4313	5.20098	9.36686e-73	0.206622	up	2.14131e-71	All genes	FALSE
CFAP65	CFAP65	0.000972085	1.64419	0.100557	0.659205	0.32681	0.67319	TRUE	29.3751	4.24235	1.20173e-96	0.238203	up	5.16803e-95	All genes	FALSE
GLB1L	GLB1L	-0.00144092	1.31276	0.0980469	0.497864	0.587564	0.412436	TRUE	36.4399	7.05867	1.89682e-45	0.120794	up	2.32736e-44	All genes	TRUE
TUBA4B	TUBA4B	0.00213407	1.94241	0.0943682	0.774855	0.247249	0.752751	TRUE	27.4431	3.62332	1.0267e-120	0.363559	up	9.10092e-119	All genes	FALSE
AC009502.4	AC009502.4	-0.00151862	1.35244	0.0966183	0.533734	0.633229	0.366771	TRUE	37.5608	7.82163	1.04048e-38	0.120031	up	1.04735e-37	All genes	FALSE
DAW1	DAW1	-0.00338527	1.64072	0.0946368	0.679433	0.360557	0.639443	TRUE	30.8079	4.61336	8.73118e-87	0.24188	up	2.76817e-85	All genes	FALSE
FBXO36	FBXO36	-0.00417494	1.35673	0.0970214	0.49817	0.519019	0.480981	TRUE	34.5083	6.16097	1.58708e-55	0.127502	up	2.51587e-54	All genes	FALSE
IQCA1	IQCA1	-0.000623606	1.59423	0.0980724	0.647573	0.365564	0.634436	TRUE	30.1922	4.57735	8.70916e-86	0.193435	up	2.63611e-84	All genes	FALSE
COPS8	COPS8	-0.000822898	1.28129	0.0976954	0.438426	0.544935	0.455065	TRUE	36.3416	10.0245	1.71938e-22	0.0311675	up	9.79426e-22	All genes	TRUE
TRAF3IP1	TRAF3IP1	0.00109806	1.43864	0.0950846	0.597769	0.472403	0.527597	TRUE	33.0091	5.83117	1.70662e-58	0.112555	up	2.90694e-57	All genes	FALSE
ANKMY1	ANKMY1	-0.00599485	1.43609	0.0960881	0.603198	0.461407	0.538593	TRUE	33.0056	5.54101	4.28169e-65	0.148846	up	8.43425e-64	All genes	FALSE
CROCC2	CROCC2	-0.000763447	1.25304	0.0981349	0.437122	0.635406	0.364594	TRUE	37.4658	7.79436	6.85667e-39	0.123091	up	6.92604e-38	All genes	TRUE
PPP1R7	PPP1R7	0.000226379	1.60903	0.0900633	0.716091	0.331152	0.668848	TRUE	25.7021	5.56649	1.04072e-49	0.0742204	up	1.44883e-48	All genes	FALSE
SRGAP3-AS2	SRGAP3-AS2	-0.00500456	2.1226	0.0929296	0.88537	0.266255	0.733745	TRUE	28.3075	3.83317	1.49013e-112	0.353717	up	9.73288e-111	All genes	FALSE
FGD5-AS1	FGD5-AS1	-0.00289153	1.26485	0.0959157	0.419477	0.563783	0.436217	TRUE	37.4433	10.1263	8.51595e-23	0.0323556	up	4.91222e-22	All genes	FALSE
EFHB	EFHB	-0.00593123	1.48775	0.0969893	0.628105	0.444504	0.555496	TRUE	32.6966	5.36939	1.1244e-68	0.167264	up	2.38236e-67	All genes	FALSE
NEK10	NEK10	-0.0058212	1.6294	0.0940934	0.688302	0.359786	0.640214	TRUE	30.8824	4.628	1.59104e-86	0.248553	up	4.97172e-85	All genes	FALSE
CMTM6	CMTM6	-0.00610394	1.61568	0.0934068	0.661663	0.277089	0.722911	TRUE	18.6691	6.63917	7.19309e-29	0.040885	up	5.22898e-28	All genes	FALSE
PDCD6IP	PDCD6IP	-0.00179645	1.4763	0.0927879	0.615816	0.361392	0.638608	TRUE	24.3489	7.77878	2.22698e-25	0.0336212	up	1.42353e-24	All genes	FALSE
DLEC1	DLEC1	-0.0015955	1.69546	0.0974901	0.711942	0.329704	0.670296	TRUE	30.234	4.40192	3.79354e-93	0.280068	up	1.41436e-91	All genes	FALSE
TTC21A	TTC21A	-0.00229194	1.51222	0.101981	0.608188	0.410895	0.589105	TRUE	31.9508	5.03891	5.29147e-76	0.201476	up	1.29485e-74	All genes	FALSE
ULK4	ULK4	-0.00155343	1.39929	0.0982053	0.542239	0.468094	0.531906	TRUE	33.2354	5.57137	4.35238e-65	0.162193	up	8.5541e-64	All genes	FALSE
LTF	LTF	-0.00101167	2.76338	0.101486	1.73094	0.88245	0.11755	TRUE	23.7902	3.80239	1.22492e-75	0.567224	down	2.95579e-74	All genes	TRUE
KIF9	KIF9	-0.00759377	2.37842	0.0947051	0.978842	0.188534	0.811466	TRUE	23.6157	3.08727	2.1823e-135	0.335482	up	3.64569e-133	All genes	FALSE
PRKAR2A	PRKAR2A	-0.00568963	1.34366	0.0973352	0.509265	0.496881	0.503119	TRUE	33.4343	8.78738	1.78457e-26	0.0365828	up	1.19159e-25	All genes	FALSE
P4HTM	P4HTM	-0.00227077	2.04569	0.0948819	0.818066	0.180387	0.819613	TRUE	22.2921	3.16014	1.76239e-122	0.277464	up	1.68241e-120	All genes	FALSE
DALRD3	DALRD3	1.50681e-06	1.58767	0.0979056	0.62625	0.314422	0.685578	TRUE	27.6648	4.20863	1.56226e-91	0.178059	up	5.51681e-90	All genes	FALSE
CDHR4	CDHR4	-0.00521855	1.86366	0.0974069	0.757827	0.279946	0.720054	TRUE	28.5447	3.91352	2.41888e-109	0.320748	up	1.39158e-107	All genes	FALSE
IFRD2	IFRD2	-0.00186975	1.07561	0.0995468	0.232922	0.891788	0.108212	TRUE	21.3934	7.50818	2.2489e-23	0.093988	down	1.32629e-22	All genes	FALSE
TUSC2	TUSC2	-0.00623093	1.40167	0.0964983	0.584583	0.426237	0.573763	TRUE	29.6241	7.42598	1.77969e-32	0.0450701	up	1.48371e-31	All genes	FALSE
ZMYND10	ZMYND10	-0.00248728	3.0014	0.100746	1.01508	0.139481	0.860519	TRUE	22.14	2.68977	6.74315e-136	0.640815	up	1.19546e-133	All genes	FALSE
DNAH1	DNAH1	-0.000721765	1.4048	0.0954835	0.566595	0.51297	0.48703	TRUE	34.4912	6.11754	2.06954e-56	0.138227	up	3.32927e-55	All genes	FALSE
CCDC66	CCDC66	-0.00296066	1.26885	0.0957175	0.431342	0.568203	0.431797	TRUE	36.3745	7.52167	2.14732e-39	0.0699717	up	2.20494e-38	All genes	FALSE
DNAH12	DNAH12	0.00504851	3.02888	0.101051	0.962694	0.145204	0.854796	TRUE	22.716	2.79292	9.07826e-131	0.688545	up	1.21327e-128	All genes	FALSE
FAM3D	FAM3D	0.0019598	1.60197	0.0972045	1.01543	0.834703	0.165297	TRUE	24.9395	4.22952	5.13337e-76	0.288133	down	1.25971e-74	All genes	FALSE
SNTN	SNTN	-0.0101458	3.63365	0.0926429	1.21468	0.13859	0.86141	TRUE	22.14	2.74604	6.3336e-126	0.690362	up	7.23947e-124	All genes	FALSE
STX19	STX19	0.000308304	1.08342	0.0977805	0.237544	0.893279	0.106721	TRUE	16.9969	12.3663	4.63469e-09	0.0311736	down	1.17896e-08	All genes	TRUE
ARL6	ARL6	-0.00215039	1.23654	0.0969332	0.42799	0.609915	0.390085	TRUE	37.3388	7.49362	2.31723e-41	0.0973334	up	2.53844e-40	All genes	FALSE
TMEM45A	TMEM45A	-0.00271896	2.00621	0.09988	1.10341	0.86513	0.13487	TRUE	25.1165	3.88635	3.85982e-84	0.548973	down	1.12141e-82	All genes	FALSE
IFT57	IFT57	0.00190176	2.70096	0.090171	1.03299	0.12618	0.87382	TRUE	19.5965	2.77425	2.16478e-124	0.370883	up	2.26572e-122	All genes	FALSE
DZIP3	DZIP3	-0.00754062	1.83377	0.0959853	0.796266	0.260632	0.739368	TRUE	27.5708	3.71754	7.22165e-116	0.305755	up	5.27181e-114	All genes	FALSE
CFAP44	CFAP44	-0.00656988	1.73425	0.0978191	0.734547	0.345403	0.654597	TRUE	30.1107	4.42759	1.61868e-91	0.236153	up	5.69291e-90	All genes	FALSE
CCDC191	CCDC191	-0.00614319	1.56876	0.0908401	0.635536	0.348961	0.651039	TRUE	30.011	4.43491	8.44054e-91	0.222282	up	2.9447e-89	All genes	FALSE
MAATS1	MAATS1	-0.00334595	1.59286	0.0923384	0.615091	0.358226	0.641774	TRUE	30.3842	4.51155	3.91492e-89	0.230682	up	1.30803e-87	All genes	FALSE
IQCB1	IQCB1	0.00168035	1.29051	0.0992457	0.460504	0.574936	0.425064	TRUE	36.6642	7.57316	2.95237e-39	0.0712331	up	3.01377e-38	All genes	TRUE
CFAP100	CFAP100	-0.00388599	1.61981	0.095984	0.691128	0.353055	0.646945	TRUE	30.6893	4.57116	5.59032e-88	0.246907	up	1.82568e-86	All genes	FALSE
CHCHD6	CHCHD6	-0.00347901	1.33351	0.100291	0.479363	0.516819	0.483181	TRUE	34.2901	6.63988	4.43193e-47	0.0829228	up	5.68688e-46	All genes	FALSE
MGLL	MGLL	-0.00375006	1.40978	0.100012	0.608199	0.534398	0.465602	TRUE	35.5421	7.86593	4.89025e-35	0.055317	up	4.39768e-34	All genes	TRUE
RUVBL1	RUVBL1	-0.00164293	1.77619	0.097571	0.761104	0.297792	0.702208	TRUE	27.3385	4.07308	2.73895e-96	0.192037	up	1.15599e-94	All genes	FALSE
EFCAB12	EFCAB12	-0.00757413	1.4033	0.0958323	0.529823	0.449381	0.550619	TRUE	32.751	5.37494	1.01807e-68	0.171758	up	2.16765e-67	All genes	FALSE
IFT122	IFT122	-0.00105419	1.30843	0.0988136	0.476685	0.551901	0.448099	TRUE	35.5956	6.88227	6.35197e-46	0.0890799	up	7.95095e-45	All genes	TRUE
NEK11	NEK11	-0.00205782	1.53626	0.0951175	0.584344	0.369252	0.630748	TRUE	30.3168	4.57378	2.19762e-86	0.201832	up	6.79386e-85	All genes	FALSE
DZIP1L	DZIP1L	0.00473471	1.4919	0.0972247	0.590338	0.399429	0.600571	TRUE	31.6915	4.93706	2.05307e-78	0.210927	up	5.372e-77	All genes	FALSE
NME9	NME9	-0.00651988	1.41189	0.0996057	0.578159	0.462138	0.537862	TRUE	33.282	5.56364	1.61473e-65	0.1758	up	3.22463e-64	All genes	FALSE
FAIM	FAIM	-0.00360076	1.52424	0.0953353	0.664585	0.385261	0.614739	TRUE	29.2451	5.43534	9.66444e-59	0.0947551	up	1.65592e-57	All genes	FALSE
TM4SF1	TM4SF1	0.00229711	1.52118	0.100739	0.95279	0.733631	0.266369	TRUE	20.5979	6.4289	6.66052e-32	0.0556713	down	5.46364e-31	All genes	FALSE
ANKUB1	ANKUB1	-0.0020082	1.80433	0.0975008	0.749007	0.339573	0.660427	TRUE	29.9362	4.37613	5.23068e-93	0.239228	up	1.91725e-91	All genes	FALSE
PFN2	PFN2	-0.00494335	1.88265	0.0935038	0.758148	0.2125	0.7875	TRUE	18.7427	4.68414	3.50926e-54	0.090372	up	5.44373e-53	All genes	FALSE
ERICH6-AS1	ERICH6-AS1	0.00120713	1.34415	0.0989497	0.541282	0.519434	0.480566	TRUE	34.6038	6.22067	1.32622e-54	0.122646	up	2.07209e-53	All genes	FALSE
LEKR1	LEKR1	-0.00450839	1.30073	0.100768	0.475836	0.551036	0.448964	TRUE	35.4387	6.56065	1.23839e-50	0.120947	up	1.78111e-49	All genes	FALSE
MLF1	MLF1	-0.00350597	2.15174	0.0976295	0.831392	0.235552	0.764448	TRUE	25.6162	3.42874	6.87861e-124	0.292308	up	7.02994e-122	All genes	FALSE
LXN	LXN	-0.00519781	1.60699	0.0939339	0.713498	0.350003	0.649997	TRUE	26.0603	6.10893	3.98556e-42	0.0606908	up	4.43879e-41	All genes	FALSE
IFT80	IFT80	-0.0014934	1.29659	0.0999563	0.482719	0.53815	0.46185	TRUE	35.1275	6.64097	1.45316e-48	0.0956108	up	1.96018e-47	All genes	FALSE
ZBBX	ZBBX	0.00111959	1.90742	0.0964381	0.723363	0.257364	0.742636	TRUE	27.9668	3.74193	4.39651e-116	0.370304	up	3.29246e-114	All genes	FALSE
WDR49	WDR49	-0.00320939	1.56157	0.097402	0.632043	0.39117	0.60883	TRUE	30.8915	4.82221	2.07903e-79	0.175625	up	5.57423e-78	All genes	FALSE
LRRC34	LRRC34	-0.00313705	1.50421	0.0974678	0.631172	0.402241	0.597759	TRUE	32.0523	5.04637	3.22964e-76	0.222634	up	7.99312e-75	All genes	FALSE
TMEM212	TMEM212	0.00257615	1.51202	0.0978144	0.617665	0.41625	0.58375	TRUE	32.3377	5.1591	1.03232e-73	0.213941	up	2.40408e-72	All genes	FALSE
TNFSF10	TNFSF10	-0.00615601	1.4864	0.0948019	0.893154	0.67106	0.32894	TRUE	24.6307	4.71403	1.02527e-65	0.105862	down	2.0617e-64	All genes	FALSE
CCDC39	CCDC39	-0.00283173	1.74008	0.0913565	0.691419	0.297428	0.702572	TRUE	29.3085	4.11465	2.13799e-102	0.315592	up	1.05527e-100	All genes	FALSE
B3GNT5	B3GNT5	0.000379808	1.38597	0.096819	0.568968	0.462282	0.537718	TRUE	32.2606	6.34002	4.13403e-48	0.0777939	up	5.50803e-47	All genes	FALSE
IGF2BP2	IGF2BP2	0.000448811	1.3163	0.096374	0.483187	0.497376	0.502624	TRUE	33.442	7.56516	2.42339e-35	0.0526761	up	2.19749e-34	All genes	TRUE
ST6GAL1	ST6GAL1	-0.00327229	1.21473	0.101086	0.454085	0.823719	0.176281	TRUE	19.4224	7.57753	2.42652e-22	0.0540895	down	1.37682e-21	All genes	FALSE
LPP	LPP	-0.00098459	1.2298	0.0988204	0.444925	0.745744	0.254256	TRUE	18.1559	7.57523	3.44007e-22	0.0365008	down	1.94051e-21	All genes	TRUE
TCTEX1D2	TCTEX1D2	-0.0111906	2.24155	0.0940177	0.989399	0.226037	0.773963	TRUE	25.3053	3.40641	1.12373e-123	0.286266	up	1.1351e-121	All genes	FALSE
IQCG	IQCG	-0.00555854	1.94415	0.0925315	0.817091	0.241883	0.758117	TRUE	26.6712	3.5231	2.66925e-123	0.32145	up	2.57642e-121	All genes	FALSE
C4orf48	C4orf48	0.00652282	1.80203	0.0982234	0.755477	0.297382	0.702618	TRUE	25.5718	4.51111	6.44358e-74	0.123844	up	1.51695e-72	All genes	FALSE
S100P	S100P	-0.00099856	1.77526	0.0976829	1.28354	0.682613	0.317387	TRUE	22.9005	5.24448	1.34271e-50	0.0792984	down	1.92477e-49	All genes	FALSE
KIAA0232	KIAA0232	-0.00188187	1.26779	0.0991894	0.447949	0.584451	0.415549	TRUE	37.5711	8.4322	1.236e-32	0.0543614	up	1.0384e-31	All genes	FALSE
CCDC96	CCDC96	-0.00676373	1.40523	0.0964509	0.59016	0.553474	0.446526	TRUE	35.5962	6.64032	5.8808e-50	0.137362	up	8.29326e-49	All genes	FALSE
CC2D2A	CC2D2A	-0.00205607	1.62087	0.0937009	0.737355	0.334786	0.665214	TRUE	29.6442	4.37279	5.66501e-92	0.214814	up	2.04199e-90	All genes	FALSE
ANAPC4	ANAPC4	-0.000968557	1.37299	0.0974522	0.523884	0.493528	0.506472	TRUE	33.4111	6.73445	2.19249e-44	0.0721356	up	2.60907e-43	All genes	FALSE
DTHD1	DTHD1	-0.00400587	1.86223	0.10052	0.761242	0.270663	0.729337	TRUE	28.4477	3.87239	4.64267e-111	0.345491	up	2.82034e-109	All genes	FALSE
WDR19	WDR19	0.00105917	1.39172	0.0961331	0.515694	0.44448	0.55552	TRUE	32.4624	5.30856	1.37567e-69	0.163205	up	2.9951e-68	All genes	FALSE
UGDH	UGDH	-0.00490521	1.38948	0.0959825	0.543239	0.462906	0.537094	TRUE	31.8487	7.00871	5.77132e-39	0.0578864	up	5.85011e-38	All genes	FALSE
NSUN7	NSUN7	-0.00300117	1.56815	0.0945899	0.668875	0.365421	0.634579	TRUE	29.8939	4.63105	9.48981e-83	0.17076	up	2.65929e-81	All genes	FALSE
SLAIN2	SLAIN2	-0.00014651	1.66849	0.0927969	0.796328	0.363947	0.636053	TRUE	28.5706	5.16544	2.19381e-63	0.103837	up	4.17016e-62	All genes	FALSE
SPATA18	SPATA18	-0.00376388	2.01395	0.0965633	0.831063	0.227787	0.772213	TRUE	26.2814	3.40114	3.86099e-129	0.35601	up	4.93241e-127	All genes	FALSE
CHIC2	CHIC2	-0.000760222	1.26469	0.0937369	0.450023	0.546834	0.453166	TRUE	36.1342	8.82011	1.49268e-28	0.0423259	up	1.07499e-27	All genes	FALSE
HOPX	HOPX	-0.000880601	1.36071	0.0971133	0.810687	0.821753	0.178247	TRUE	21.6364	6.52602	4.44596e-31	0.0838124	down	3.53359e-30	All genes	FALSE
IGFBP7	IGFBP7	0.00942895	3.5878	0.0942114	1.16246	0.150946	0.849054	TRUE	22.465	2.70258	6.21073e-148	0.544081	up	6.74408e-145	All genes	FALSE
CXCL1	CXCL1	-0.00320252	2.80413	0.0987807	1.76285	0.85486	0.14514	TRUE	25.0565	3.76787	3.51786e-90	0.497402	down	1.20789e-88	All genes	FALSE
CXCL2	CXCL2	-0.00221221	2.45305	0.0976557	1.69509	0.879711	0.120289	TRUE	24.1753	4.25782	4.38849e-68	0.375925	down	9.16413e-67	All genes	TRUE
FAM47E	FAM47E	-0.00206059	1.25883	0.097072	0.444639	0.620284	0.379716	TRUE	37.4343	7.57273	8.2447e-41	0.106695	up	8.85311e-40	All genes	FALSE
SHROOM3	SHROOM3	-0.00702557	1.55676	0.0899206	0.657735	0.333346	0.666654	TRUE	25.9048	5.4046	5.98271e-53	0.0802643	up	9.02289e-52	All genes	FALSE
ANXA3	ANXA3	-0.00429359	1.23754	0.0973829	0.490193	0.858146	0.141854	TRUE	17.8901	9.91863	2.08066e-13	0.0380327	down	7.28819e-13	All genes	TRUE
C4orf22	C4orf22	-0.00731704	1.61806	0.0988329	0.640907	0.333527	0.666473	TRUE	29.9295	4.33924	1.32727e-94	0.258924	up	5.26483e-93	All genes	FALSE
PLAC8	PLAC8	0.00320754	2.09235	0.0874572	0.991089	0.200124	0.799876	TRUE	15.2666	5.57733	7.93325e-36	0.0572593	up	7.30044e-35	All genes	FALSE
CDS1	CDS1	-0.00651283	1.99353	0.0898705	0.800282	0.213225	0.786775	TRUE	24.0577	3.36966	2.41842e-119	0.258788	up	2.03969e-117	All genes	FALSE
MAPK10	MAPK10	-0.00248117	1.39533	0.0982071	0.545555	0.441383	0.558617	TRUE	32.0267	5.41857	1.9342e-65	0.128663	up	3.84495e-64	All genes	FALSE
FAM13A	FAM13A	0.00338832	1.40461	0.0943321	0.550458	0.42342	0.57658	TRUE	29.3378	7.26288	1.38955e-33	0.0468195	up	1.19633e-32	All genes	FALSE
ADH1C	ADH1C	-0.00181045	1.47268	0.0975573	0.945107	0.788637	0.211363	TRUE	21.0794	6.78484	4.73355e-29	0.0648623	down	3.45549e-28	All genes	FALSE
SGMS2	SGMS2	0.000321081	1.27884	0.0970938	0.504307	0.546003	0.453997	TRUE	36.4596	9.1914	1.23555e-26	0.0388742	up	8.27539e-26	All genes	FALSE
PRSS12	PRSS12	-0.00291165	1.49428	0.0911323	0.58542	0.379928	0.620072	TRUE	29.9291	4.7832	1.22076e-77	0.150627	up	3.13749e-76	All genes	FALSE
INTU	INTU	0.00041791	1.28922	0.0997448	0.447295	0.548301	0.451699	TRUE	35.3508	6.61776	2.15029e-49	0.104361	up	2.9792e-48	All genes	FALSE
TTC29	TTC29	-0.00225015	1.66772	0.0976646	0.680815	0.328943	0.671057	TRUE	30.1647	4.38256	1.07385e-93	0.278798	up	4.1037e-92	All genes	FALSE
LRBA	LRBA	-0.00197898	1.36487	0.0972897	0.528947	0.432793	0.567207	TRUE	30.5245	6.37348	6.54548e-45	0.0678979	up	7.90829e-44	All genes	FALSE
TMEM154	TMEM154	-0.00160914	1.34854	0.0969496	0.523686	0.537006	0.462994	TRUE	35.097	6.55822	8.4293e-50	0.101534	up	1.17915e-48	All genes	FALSE
MAP9	MAP9	-0.00300305	1.64896	0.0966071	0.700833	0.318936	0.681064	TRUE	27.497	4.38985	9.40552e-84	0.152667	up	2.71448e-82	All genes	FALSE
LINC01207	LINC01207	-0.00237515	1.19911	0.100241	0.405778	0.850028	0.149972	TRUE	21.7122	6.59037	1.99253e-30	0.0911899	down	1.54684e-29	All genes	FALSE
NEK1	NEK1	-0.000610925	1.3989	0.098541	0.56559	0.444342	0.555658	TRUE	31.8762	5.65437	1.14585e-59	0.106882	up	2.01907e-58	All genes	FALSE
GALNT7	GALNT7	-0.000537248	1.16935	0.0992671	0.380593	0.88161	0.11839	TRUE	21.345	7.04421	5.42027e-26	0.0981502	down	3.56716e-25	All genes	TRUE
HMGB2	HMGB2	-0.00453463	1.46703	0.0968792	0.59153	0.387611	0.612389	TRUE	28.0367	6.24386	4.54714e-43	0.0626862	up	5.21121e-42	All genes	FALSE
SPATA4	SPATA4	-0.000908086	1.40809	0.0972061	0.555679	0.473797	0.526203	TRUE	33.5888	5.68994	2.11653e-63	0.175712	up	4.03208e-62	All genes	FALSE
SLC25A4	SLC25A4	-0.00346525	1.5598	0.09605	0.681042	0.358858	0.641142	TRUE	26.7011	6.04689	7.45328e-44	0.0637435	up	8.74954e-43	All genes	FALSE
ANKRD37	ANKRD37	-0.00388253	1.7814	0.0938535	0.817639	0.30037	0.69963	TRUE	27.6909	4.12884	4.06453e-95	0.191156	up	1.64226e-93	All genes	FALSE
C4orf47	C4orf47	0.000253841	1.82547	0.0921609	0.711752	0.266661	0.733339	TRUE	27.9251	3.76055	5.39438e-115	0.329275	up	3.84106e-113	All genes	FALSE
SORBS2	SORBS2	-0.00425184	1.34638	0.0975669	0.515811	0.494244	0.505756	TRUE	33.2481	9.35878	2.31057e-23	0.0313735	up	1.36173e-22	All genes	FALSE
TRIP13	TRIP13	-0.0028931	1.59092	0.0969071	0.68158	0.561153	0.438847	TRUE	35.8649	6.76017	1.51897e-48	0.126173	up	2.04578e-47	All genes	FALSE
C5orf49	C5orf49	0.000802558	3.05729	0.0944908	1.03572	0.152637	0.847363	TRUE	22.7622	2.72796	2.89934e-148	0.557136	up	3.59808e-145	All genes	FALSE
SNHG18	SNHG18	0.00418921	1.18973	0.0965824	0.420753	0.831796	0.168204	TRUE	20.9961	6.60246	9.22931e-30	0.0787107	down	6.94156e-29	All genes	FALSE
CCT5	CCT5	0.0010754	1.46753	0.0938827	0.61371	0.369904	0.630096	TRUE	24.7032	8.01846	3.07424e-24	0.0318495	up	1.87542e-23	All genes	FALSE
2023-03-06	2023-03-06	-0.00465593	1.42799	0.0960654	0.555504	0.406614	0.593386	TRUE	28.6905	6.63548	3.96088e-39	0.0560148	up	4.01964e-38	All genes	FALSE
ROPN1L	ROPN1L	-0.000261542	2.55358	0.0967093	1.04453	0.184135	0.815865	TRUE	24.8365	3.04918	2.28116e-144	0.471945	up	1.10091e-141	All genes	FALSE
DNAH5	DNAH5	-0.00468667	2.40953	0.0907299	0.979254	0.158526	0.841474	TRUE	22.1259	2.87256	1.44283e-139	0.375896	up	3.48164e-137	All genes	FALSE
BASP1	BASP1	-0.000840135	1.78641	0.0950816	0.968318	0.53421	0.46579	TRUE	35.4047	6.58902	5.28242e-50	0.110915	up	7.46152e-49	All genes	FALSE
RAI14	RAI14	-0.00291503	1.19314	0.100251	0.428108	0.789048	0.210952	TRUE	19.08	7.32677	9.63468e-24	0.0478637	down	5.75234e-23	All genes	FALSE
SPEF2	SPEF2	0.00137939	1.92435	0.0933483	0.755613	0.254736	0.745264	TRUE	27.585	3.66572	6.77867e-119	0.349606	up	5.60822e-117	All genes	FALSE
CAPSL	CAPSL	0.00651293	2.87533	0.0937201	1.07879	0.170266	0.829734	TRUE	24.258	2.9351	6.74558e-146	0.556554	up	3.90659e-143	All genes	FALSE
C5orf42	C5orf42	-0.00180554	1.40963	0.0991008	0.554112	0.432585	0.567415	TRUE	30.8189	5.9663	1.22968e-51	0.0823158	up	1.80444e-50	All genes	FALSE
C6	C6	0.000838455	1.7013	0.0944764	0.670082	0.41059	0.58941	TRUE	31.6605	4.98564	1.21508e-76	0.186152	up	3.0507e-75	All genes	FALSE
PLK2	PLK2	-0.00424433	1.5193	0.0998278	0.808864	0.877658	0.122342	TRUE	23.7939	4.4532	9.22595e-63	0.306863	down	1.73852e-61	All genes	FALSE
KIF2A	KIF2A	-0.0017688	1.33054	0.0967133	0.512814	0.526161	0.473839	TRUE	35.2584	9.30558	4.41291e-25	0.0351321	up	2.79003e-24	All genes	FALSE
CCDC125	CCDC125	0.00620568	1.29467	0.099116	0.485629	0.574688	0.425312	TRUE	37.3648	8.61929	4.83991e-31	0.0496809	up	3.83966e-30	All genes	FALSE
MAP1B	MAP1B	-0.00246349	1.49281	0.0978196	0.618868	0.498658	0.501342	TRUE	34.1972	5.96591	7.15746e-59	0.15702	up	1.23122e-57	All genes	FALSE
CTD-2015H6.3	CTD-2015H6.3	-0.00430688	1.33793	0.0979435	0.541462	0.550105	0.449895	TRUE	36.4036	8.53277	1.04594e-30	0.0471457	up	8.19301e-30	All genes	FALSE
MSH3	MSH3	0.00146139	1.41029	0.0951108	0.612182	0.49963	0.50037	TRUE	33.9678	6.8873	2.93085e-43	0.0710347	up	3.38118e-42	All genes	FALSE
FAM81B	FAM81B	0.00173798	2.04034	0.0902495	0.854577	0.253236	0.746764	TRUE	27.2424	3.62317	6.69934e-120	0.3246	up	5.76209e-118	All genes	FALSE
GLRX	GLRX	8.67126e-05	1.24981	0.0986152	0.550741	0.750773	0.249227	TRUE	19.517	7.04859	3.53436e-26	0.0461515	down	2.34017e-25	All genes	TRUE
PAM	PAM	0.000399078	1.20921	0.0991089	0.626036	0.86166	0.13834	TRUE	23.3861	5.08131	4.79796e-50	0.196562	down	6.78825e-49	All genes	FALSE
TMEM232	TMEM232	-0.00499655	1.61085	0.0974906	0.646255	0.345704	0.654296	TRUE	30.1314	4.4284	1.43779e-91	0.238409	up	5.1189e-90	All genes	FALSE
COMMD10	COMMD10	0.000739956	1.05812	0.100528	0.220748	0.895025	0.104975	TRUE	17.6641	10.978	4.91542e-11	0.0401107	down	1.44845e-10	All genes	TRUE
CTD-2544H17.1	CTD-2544H17.1	-0.00207881	1.41668	0.0964624	0.590596	0.502642	0.497358	TRUE	34.3279	6.0255	5.56824e-58	0.154655	up	9.3201e-57	All genes	FALSE
PDLIM4	PDLIM4	-0.005831	1.75584	0.0931201	0.757948	0.318595	0.681405	TRUE	26.3508	4.77358	3.08026e-68	0.111552	up	6.46334e-67	All genes	FALSE
KIF3A	KIF3A	-0.00311938	1.45612	0.0946237	0.578222	0.395193	0.604807	TRUE	30.4895	4.94298	2.81849e-74	0.144407	up	6.67145e-73	All genes	FALSE
C5orf15	C5orf15	-0.00618736	1.56584	0.0959791	0.626895	0.323468	0.676532	TRUE	25.5868	5.14763	1.73278e-57	0.0889987	up	2.86173e-56	All genes	FALSE
NME5	NME5	0.00352677	2.01315	0.0935419	0.867504	0.239393	0.760607	TRUE	26.2614	3.50553	2.4335e-122	0.298088	up	2.29206e-120	All genes	FALSE
PAIP2	PAIP2	-0.0025352	1.58721	0.0958401	0.64655	0.304795	0.695205	TRUE	21.0439	6.7004	2.23705e-30	0.0423183	up	1.73202e-29	All genes	FALSE
TMEM173	TMEM173	0.00308912	1.62435	0.0959241	0.669975	0.301895	0.698105	TRUE	25.5518	4.63083	2.89717e-70	0.115605	up	6.33947e-69	All genes	FALSE
CYSTM1	CYSTM1	-0.000110006	2.78975	0.089949	1.06733	0.123612	0.876388	TRUE	17.3206	3.19599	4.59355e-93	0.234188	up	1.69805e-91	All genes	FALSE
IK	IK	-0.00802081	2.68211	0.0899416	1.0158	0.119323	0.880677	TRUE	18.7653	2.83475	2.45137e-115	0.339688	up	1.77459e-113	All genes	FALSE
CCDC69	CCDC69	-0.00157319	1.30833	0.0976346	0.478901	0.536252	0.463748	TRUE	35.0622	6.83133	1.0638e-45	0.0833002	up	1.32017e-44	All genes	FALSE
FABP6	FABP6	-4.26914e-05	1.92567	0.0982736	0.826904	0.369921	0.630079	TRUE	30.377	4.61313	4.23673e-85	0.195195	up	1.26476e-83	All genes	FALSE
CCNG1	CCNG1	0.00563886	1.09674	0.100709	0.314386	0.857554	0.142446	TRUE	19.1117	8.40145	2.79755e-18	0.0529325	down	1.31577e-17	All genes	FALSE
RPL26L1	RPL26L1	-0.00577299	1.33817	0.0970117	0.528517	0.491249	0.508751	TRUE	33.225	9.15532	2.45379e-24	0.0329462	up	1.50219e-23	All genes	TRUE
PRR7	PRR7	-0.00112511	1.3379	0.0942833	0.5473	0.563292	0.436708	TRUE	35.9825	6.84252	2.54441e-47	0.107027	up	3.28918e-46	All genes	FALSE
C5orf45	C5orf45	-0.00257173	1.3523	0.0990289	0.503098	0.476916	0.523084	TRUE	33.0725	5.80485	3.44209e-59	0.116223	up	5.99226e-58	All genes	FALSE
SCGB3A1	SCGB3A1	1.1396	9.22635	1.11321	2.87554	0.781072	0.218928	TRUE	25.1173	3.14638	4.53661e-140	0.406611	down	1.19423e-137	All genes	FALSE
SERPINB1	SERPINB1	-0.00717834	1.74468	0.0933698	0.743063	0.242765	0.757235	TRUE	15.7583	6.53167	1.74453e-27	0.0402401	up	1.20276e-26	All genes	TRUE
SERPINB6	SERPINB6	-0.0116936	1.72854	0.093085	0.694839	0.244087	0.755913	TRUE	19.6331	5.18369	1.50052e-46	0.0726649	up	1.89738e-45	All genes	FALSE
PRPF4B	PRPF4B	-0.00233345	1.30192	0.0976255	0.474064	0.460496	0.539504	TRUE	30.9009	8.91215	6.90117e-24	0.0316163	up	4.13451e-23	All genes	TRUE
ECI2	ECI2	-0.000201708	1.39654	0.0965672	0.572465	0.44908	0.55092	TRUE	30.7877	8.26392	1.86016e-27	0.0372281	up	1.27943e-26	All genes	FALSE
DSP	DSP	-0.0051189	1.63208	0.0919831	0.71928	0.340413	0.659587	TRUE	25.353	6.10991	3.60827e-41	0.0590865	up	3.92795e-40	All genes	FALSE
STMND1	STMND1	-0.00315634	1.6744	0.0962595	0.680805	0.357951	0.642049	TRUE	30.4656	4.53916	2.43219e-88	0.228039	up	8.03361e-87	All genes	FALSE
RP4-625H18.2	RP4-625H18.2	-0.00148047	1.41818	0.0923719	0.588692	0.505319	0.494681	TRUE	34.2984	6.02579	8.77972e-58	0.143935	up	1.45552e-56	All genes	FALSE
FAM65B	FAM65B	-0.00659689	1.6369	0.0948363	0.68985	0.368358	0.631642	TRUE	30.386	4.62427	1.03461e-84	0.192944	up	3.05703e-83	All genes	FALSE
HIST1H1C	HIST1H1C	0.00109122	1.87699	0.0959373	0.986765	0.335671	0.664329	TRUE	24.8496	6.54576	1.4156e-35	0.0497538	up	1.29445e-34	All genes	FALSE
IER3	IER3	-0.00431069	1.41956	0.0969945	0.834838	0.800685	0.199315	TRUE	20.907	6.71354	3.79336e-29	0.0682449	down	2.78084e-28	All genes	FALSE
HSPA1A	HSPA1A	-0.000272785	2.31502	0.0935459	1.42654	0.291381	0.708619	TRUE	21.6529	6.5607	3.76753e-32	0.0450147	up	3.10517e-31	All genes	TRUE
HSPA1B	HSPA1B	-0.00552915	1.9083	0.0931925	1.18765	0.374884	0.625116	TRUE	27.4504	7.31652	3.09679e-31	0.0426562	up	2.47715e-30	All genes	TRUE
SLC44A4	SLC44A4	0.546809	2.76095	0.600075	0.877063	0.179849	0.820151	TRUE	20.8947	3.65363	1.90731e-90	0.174741	up	6.60112e-89	All genes	FALSE
NELFE	NELFE	-0.00460144	1.59703	0.0956008	0.652506	0.299526	0.700474	TRUE	24.0898	5.14602	1.17639e-54	0.0838965	up	1.84464e-53	All genes	FALSE
PFDN6	PFDN6	0.000538377	1.45517	0.0977604	0.58556	0.390592	0.609408	TRUE	27.7674	6.66193	1.05053e-37	0.0533201	up	1.03352e-36	All genes	FALSE
CDKN1A	CDKN1A	-0.00488664	1.51931	0.0946892	0.698377	0.425224	0.574776	TRUE	29.3139	8.40666	1.99421e-25	0.0337411	up	1.28039e-24	All genes	TRUE
KIF6	KIF6	-0.00210564	1.24182	0.098412	0.422298	0.634867	0.365133	TRUE	37.5774	7.7635	3.17867e-39	0.115708	up	3.24098e-38	All genes	TRUE
C6orf132	C6orf132	-0.00242377	1.34399	0.10012	0.539979	0.554832	0.445168	TRUE	36.5485	8.49341	3.96439e-31	0.0483168	up	3.16241e-30	All genes	FALSE
CNPY3	CNPY3	-0.000448505	1.27185	0.093984	0.435514	0.522377	0.477623	TRUE	34.8544	9.44236	4.22215e-24	0.0332188	up	2.54884e-23	All genes	TRUE
DNPH1	DNPH1	-0.00242603	2.26808	0.0918667	0.941857	0.154885	0.845115	TRUE	17.546	3.76809	1.16542e-74	0.151161	up	2.76613e-73	All genes	FALSE
LRRC73	LRRC73	-0.0019406	1.31558	0.0960791	0.534923	0.578768	0.421232	TRUE	36.2792	6.9811	3.11101e-46	0.124428	up	3.9224e-45	All genes	FALSE
RSPH9	RSPH9	0.000516778	2.46537	0.0953827	0.997582	0.207115	0.792885	TRUE	25.8581	3.25372	2.63266e-136	0.431641	up	4.86595e-134	All genes	FALSE
ENPP5	ENPP5	-0.00327203	1.40527	0.0982177	0.532005	0.489524	0.510476	TRUE	33.2488	6.48799	1.52188e-47	0.0795044	up	1.98209e-46	All genes	FALSE
ANKRD66	ANKRD66	-0.0038092	1.99253	0.0918431	0.828841	0.271297	0.728703	TRUE	28.3272	3.85026	8.98668e-112	0.33345	up	5.57623e-110	All genes	FALSE
EFHC1	EFHC1	-0.00379655	2.63424	0.0942863	0.918923	0.162357	0.837643	TRUE	23.6233	2.83478	2.43317e-148	0.557444	up	3.59808e-145	All genes	FALSE
GCLC	GCLC	-0.00497047	1.54263	0.0928914	0.758218	0.479162	0.520838	TRUE	33.2856	7.22982	2.01147e-38	0.0586509	up	2.01078e-37	All genes	FALSE
COL21A1	COL21A1	-0.00367957	1.31251	0.100878	0.512225	0.555755	0.444245	TRUE	35.6361	6.64556	8.24645e-50	0.127356	up	1.15543e-48	All genes	FALSE
FILIP1	FILIP1	-0.00803787	1.39282	0.0951224	0.558907	0.573181	0.426819	TRUE	36.0562	6.89191	3.55146e-47	0.133942	up	4.5706e-46	All genes	FALSE
PHIP	PHIP	-0.00406225	1.58062	0.0943355	0.66835	0.293949	0.706051	TRUE	19.2023	7.18187	2.11104e-25	0.0348451	up	1.3534e-24	All genes	FALSE
LCA5	LCA5	0.00266503	1.40964	0.0917971	0.553037	0.450931	0.549069	TRUE	32.0864	5.65836	4.74991e-60	0.109563	up	8.40377e-59	All genes	FALSE
SNX14	SNX14	-0.000186769	1.25946	0.0996948	0.453622	0.533119	0.466881	TRUE	35.4429	8.56101	1.31954e-29	0.0436745	up	9.86478e-29	All genes	TRUE
CFAP206	CFAP206	-0.00276907	1.35658	0.0986147	0.514618	0.507867	0.492133	TRUE	34.3287	6.02826	6.89402e-58	0.151107	up	1.14729e-56	All genes	FALSE
LYRM2	LYRM2	0.00159774	1.32388	0.0996516	0.499514	0.520836	0.479164	TRUE	34.9776	9.32287	8.78125e-25	0.0344542	up	5.48797e-24	All genes	FALSE
CD24	CD24	0.00118526	2.94395	0.0873038	1.32781	0.172806	0.827194	TRUE	20.2249	3.49093	9.49444e-95	0.192976	up	3.7834e-93	All genes	FALSE
ARMC2	ARMC2	-0.00576187	1.41494	0.0973317	0.522335	0.40711	0.59289	TRUE	31.3077	4.92948	3.05905e-77	0.17495	up	7.81587e-76	All genes	FALSE
SESN1	SESN1	-0.00390897	1.42639	0.0966702	0.565644	0.457447	0.542553	TRUE	31.8423	6.38007	7.66314e-47	0.0739463	up	9.76095e-46	All genes	FALSE
PPIL6	PPIL6	-0.0130026	2.1195	0.0933658	0.845541	0.210437	0.789563	TRUE	25.5759	3.24827	1.17943e-135	0.38192	up	2.04914e-133	All genes	FALSE
SMPD2	SMPD2	-0.0048773	1.41222	0.0930668	0.578471	0.437911	0.562089	TRUE	31.7315	5.56309	2.48999e-61	0.111068	up	4.52521e-60	All genes	FALSE
AK9	AK9	3.72408e-05	1.55969	0.0941817	0.651228	0.374244	0.625756	TRUE	30.5266	4.67233	1.96422e-83	0.18938	up	5.57619e-82	All genes	FALSE
FAM229B	FAM229B	-0.00431589	2.46211	0.0919099	1.03216	0.172877	0.827123	TRUE	23.0963	2.95476	4.64538e-141	0.373498	up	1.49461e-138	All genes	FALSE
NT5DC1	NT5DC1	0.000285929	1.36276	0.0971174	0.493892	0.480415	0.519585	TRUE	32.4516	7.74369	9.80856e-33	0.0468992	up	8.2645e-32	All genes	FALSE
RSPH4A	RSPH4A	-0.00456408	1.89243	0.0967978	0.795158	0.278795	0.721205	TRUE	28.8844	3.98761	6.97385e-107	0.341811	up	3.71668e-105	All genes	FALSE
PKIB	PKIB	-0.00405995	1.61051	0.0940596	0.84079	0.474074	0.525926	TRUE	33.0357	7.79082	5.93331e-33	0.0477451	up	5.02365e-32	All genes	TRUE
ARHGAP18	ARHGAP18	-0.00248768	2.1951	0.0950109	0.90282	0.20442	0.79558	TRUE	23.5343	3.30584	1.73252e-120	0.263343	up	1.52024e-118	All genes	FALSE
CTGF	CTGF	-0.000300134	2.27591	0.098943	1.24185	0.376714	0.623286	TRUE	29.2066	5.34406	1.19944e-60	0.0989635	up	2.1528e-59	All genes	FALSE
STX7	STX7	-0.00402376	1.28435	0.0999445	0.440887	0.553054	0.446946	TRUE	36.1885	8.36727	1.09291e-31	0.0489546	up	8.90131e-31	All genes	FALSE
VNN3	VNN3	0.00206538	1.55746	0.0972652	0.763874	0.591525	0.408475	TRUE	37.1335	7.39604	4.00777e-42	0.0964684	up	4.45781e-41	All genes	FALSE
SGK1	SGK1	0.00359023	1.24985	0.0990339	0.618043	0.891769	0.108231	TRUE	24.0336	5.63303	1.95969e-42	0.216346	down	2.21376e-41	All genes	FALSE
AHI1	AHI1	-0.00359186	1.27862	0.0961146	0.507364	0.543793	0.456207	TRUE	36.5381	9.39025	1.26841e-25	0.0370006	up	8.22287e-25	All genes	TRUE
LINC00271	LINC00271	-0.00386802	1.25528	0.0977798	0.429904	0.571188	0.428812	TRUE	35.9791	6.81408	7.64479e-48	0.116332	up	1.00469e-46	All genes	TRUE
IL20RA	IL20RA	-0.000704244	1.31743	0.097564	0.503425	0.460795	0.539205	TRUE	31.2295	8.4943	2.05713e-26	0.0356752	up	1.36937e-25	All genes	FALSE
CCDC28A	CCDC28A	-0.000138415	1.37871	0.0956067	0.563539	0.460427	0.539573	TRUE	31.8955	6.94404	9.77179e-40	0.0594223	up	1.01298e-38	All genes	FALSE
ECT2L	ECT2L	-0.00752447	1.66525	0.0938931	0.694874	0.362539	0.637461	TRUE	30.8422	4.6234	1.56356e-86	0.242146	up	4.90348e-85	All genes	FALSE
ABRACL	ABRACL	-0.00133392	1.18845	0.0972006	0.46761	0.744823	0.255177	TRUE	19.3805	7.06304	5.07743e-26	0.044171	down	3.35164e-25	All genes	FALSE
CITED2	CITED2	-0.00594471	1.58332	0.0912291	0.823349	0.403583	0.596417	TRUE	29.1044	7.14976	2.34895e-34	0.0480355	up	2.07161e-33	All genes	TRUE
ADGB	ADGB	-0.000329637	1.58733	0.0952849	0.654036	0.342861	0.657139	TRUE	30.475	4.49315	2.77458e-90	0.258855	up	9.5646e-89	All genes	FALSE
PPP1R14C	PPP1R14C	-0.0035971	1.51367	0.0961501	0.634846	0.410257	0.589743	TRUE	30.6269	5.3269	3.07533e-64	0.112961	up	5.94998e-63	All genes	FALSE
CCDC170	CCDC170	-0.00523594	2.59338	0.09618	1.00532	0.1874	0.8126	TRUE	25.1606	3.0998	4.43138e-142	0.493221	up	1.74979e-139	All genes	FALSE
SYNE1	SYNE1	-0.00381085	1.99872	0.0987273	0.766323	0.253192	0.746808	TRUE	27.1752	3.60024	5.80045e-121	0.331422	up	5.1947e-119	All genes	FALSE
GTF2H5	GTF2H5	-0.00605976	1.68315	0.0925041	0.720719	0.267535	0.732465	TRUE	20.0622	5.79925	1.83007e-38	0.0568754	up	1.83366e-37	All genes	FALSE
SYTL3	SYTL3	0.00131355	1.30773	0.0959853	0.489221	0.545087	0.454913	TRUE	35.3889	6.72502	8.38273e-48	0.0955109	up	1.0967e-46	All genes	FALSE
RSPH3	RSPH3	-0.00186895	1.52312	0.0958158	0.661991	0.384729	0.615271	TRUE	30.5362	4.87306	1.35845e-76	0.154259	up	3.39104e-75	All genes	FALSE
TCP1	TCP1	-0.00268106	1.48366	0.0950103	0.626565	0.38401	0.61599	TRUE	26.3947	7.62899	5.87046e-28	0.037465	up	4.13599e-27	All genes	FALSE
PACRG	PACRG	-0.00694125	1.78861	0.0935388	0.716856	0.302451	0.697549	TRUE	28.9093	4.05017	6.76018e-104	0.279879	up	3.43425e-102	All genes	FALSE
C6orf118	C6orf118	-0.00609167	1.89331	0.0941333	0.743721	0.252653	0.747347	TRUE	27.6026	3.66617	6.21287e-119	0.35376	up	5.18954e-117	All genes	FALSE
MLLT4	MLLT4	-0.000731258	1.74989	0.0969146	0.729143	0.236377	0.763623	TRUE	23.7033	3.8362	3.6186e-93	0.172554	up	1.35495e-91	All genes	FALSE
IQCE	IQCE	-0.00254407	1.29432	0.0938692	0.508654	0.592799	0.407201	TRUE	37.1571	7.45183	2.01897e-41	0.0886541	up	2.21729e-40	All genes	FALSE
RPA3	RPA3	-0.000936639	1.97415	0.0955665	0.832266	0.229751	0.770249	TRUE	21.7159	4.21304	9.20212e-73	0.125145	up	2.11478e-71	All genes	FALSE
AC005281.1	AC005281.1	-0.00682229	1.29063	0.100101	0.465473	0.59552	0.40448	TRUE	36.6357	7.14965	1.50454e-44	0.115448	up	1.79779e-43	All genes	TRUE
AGR3	AGR3	0.894852	3.78691	0.876106	0.926285	0.176828	0.823172	TRUE	20.664	2.97129	2.46368e-123	0.307522	up	2.40472e-121	All genes	TRUE
DNAH11	DNAH11	-0.00483743	1.98648	0.100054	0.76212	0.246663	0.753337	TRUE	27.7695	3.68659	3.59295e-118	0.401107	up	2.86348e-116	All genes	FALSE
FAM221A	FAM221A	0.0015372	1.32298	0.100824	0.514974	0.520446	0.479554	TRUE	34.7331	7.78214	7.39357e-35	0.0534592	up	6.60782e-34	All genes	TRUE
OSBPL3	OSBPL3	-0.00618274	1.38498	0.0950402	0.528693	0.46765	0.53235	TRUE	32.7796	5.69019	5.75727e-61	0.119923	up	1.03978e-59	All genes	FALSE
PRR15	PRR15	-0.00521554	1.42349	0.0988941	0.584548	0.538313	0.461687	TRUE	36.3337	9.79726	1.74294e-23	0.0329224	up	1.0314e-22	All genes	FALSE
2023-09-07	2023-09-07	0.00327172	1.5521	0.0976618	0.608882	0.320993	0.679007	TRUE	22.3993	6.61061	2.05147e-32	0.0451785	up	1.70537e-31	All genes	FALSE
POLD2	POLD2	-0.00339942	1.48546	0.0986944	0.616191	0.374852	0.625148	TRUE	27.4445	6.15936	2.28231e-43	0.0630296	up	2.64352e-42	All genes	FALSE
C7orf57	C7orf57	-0.000916832	1.71907	0.0927403	0.700543	0.302001	0.697999	TRUE	29.0267	4.07243	2.7218e-103	0.283864	up	1.36672e-101	All genes	FALSE
ABCA13	ABCA13	-0.00195115	1.64715	0.0943709	0.841083	0.423935	0.576065	TRUE	31.375	5.7317	5.13722e-57	0.0968317	up	8.35712e-56	All genes	FALSE
GBAS	GBAS	-0.00189118	1.53313	0.0954615	0.634463	0.315783	0.684217	TRUE	22.1517	6.68494	1.62321e-31	0.0437869	up	1.31783e-30	All genes	FALSE
ASL	ASL	-0.0010016	1.38178	0.0944883	0.543421	0.449104	0.550896	TRUE	31.3032	6.63285	1.26166e-42	0.0643531	up	1.43644e-41	All genes	TRUE
FKBP6	FKBP6	-0.00135547	1.47419	0.0966887	0.653192	0.578417	0.421583	TRUE	36.3273	7.04944	1.50105e-45	0.131954	up	1.8496e-44	All genes	FALSE
WBSCR22	WBSCR22	-0.00436551	1.58935	0.0987481	0.660237	0.331771	0.668229	TRUE	23.6721	6.55993	3.5888e-34	0.0476876	up	3.13641e-33	All genes	FALSE
ABHD11-AS1	ABHD11-AS1	-0.006208	1.3305	0.0960586	0.512232	0.59889	0.40111	TRUE	37.2162	7.48545	3.99909e-41	0.08762	up	4.3371e-40	All genes	TRUE
WBSCR27	WBSCR27	-0.00188282	1.41404	0.0943503	0.60732	0.534802	0.465198	TRUE	35.1353	6.41127	1.60481e-52	0.128747	up	2.38715e-51	All genes	FALSE
CTB-51J22.1	CTB-51J22.1	-0.00606444	1.65327	0.0992162	0.687021	0.357342	0.642658	TRUE	30.8003	4.60319	3.6623e-87	0.248144	up	1.17396e-85	All genes	FALSE
RHBDD2	RHBDD2	-0.000607673	1.4703	0.102068	0.571362	0.354986	0.645014	TRUE	24.2477	7.20396	3.45422e-29	0.0395545	up	2.54295e-28	All genes	TRUE
STYXL1	STYXL1	-0.00435018	1.41021	0.0930189	0.550148	0.446959	0.553041	TRUE	31.6259	5.93304	1.06949e-53	0.089321	up	1.64146e-52	All genes	FALSE
CCDC146	CCDC146	-0.00784102	2.45783	0.092678	1.01329	0.169254	0.830746	TRUE	23.5085	2.89732	2.30282e-147	0.435579	up	1.8186e-144	All genes	FALSE
TP53TG1	TP53TG1	-0.00267436	1.53111	0.0978267	0.670567	0.380573	0.619427	TRUE	28.4383	5.8258	6.70094e-50	0.0755219	up	9.41926e-49	All genes	FALSE
STEAP2	STEAP2	0.00592609	1.11967	0.101878	0.300233	0.864321	0.135679	TRUE	17.364	9.79491	2.12383e-13	0.0388852	down	7.42743e-13	All genes	TRUE
CFAP69	CFAP69	0.00411825	1.46705	0.0958565	0.554442	0.41347	0.58653	TRUE	31.4644	4.99756	1.40993e-75	0.169114	up	3.37411e-74	All genes	FALSE
AKAP9	AKAP9	0.751735	2.97596	0.687397	0.787336	0.217915	0.782085	TRUE	21.8018	3.15117	3.96097e-120	0.272061	up	3.4409e-118	All genes	FALSE
BAIAP2L1	BAIAP2L1	0.00437886	1.37603	0.0974267	0.558573	0.509287	0.490713	TRUE	34.3363	8.67615	6.95194e-28	0.0395342	up	4.88209e-27	All genes	FALSE
BUD31	BUD31	-0.00120614	1.55408	0.0965879	0.620829	0.324186	0.675814	TRUE	22.9638	6.47258	2.73114e-34	0.0480879	up	2.39409e-33	All genes	FALSE
TRIP6	TRIP6	-0.00462833	1.15847	0.102078	0.375055	0.817546	0.182454	TRUE	18.7555	7.79052	6.98576e-21	0.0480037	down	3.71164e-20	All genes	FALSE
RP11-395B7.4	RP11-395B7.4	-0.00207351	1.61485	0.0965283	0.870553	0.598775	0.401225	TRUE	37.1357	7.44216	6.57131e-42	0.114423	up	7.28124e-41	All genes	FALSE
TRIM56	TRIM56	-0.00200362	1.43535	0.0971045	0.62232	0.477153	0.522847	TRUE	32.7936	7.46358	1.53673e-35	0.0523499	up	1.40374e-34	All genes	FALSE
IFT22	IFT22	-0.00146549	2.10281	0.0917261	0.907258	0.199113	0.800887	TRUE	23.0046	3.39621	2.48777e-112	0.233795	up	1.60083e-110	All genes	FALSE
LRWD1	LRWD1	-0.00482687	1.47632	0.0976347	0.62549	0.422151	0.577849	TRUE	31.5593	5.22109	2.57001e-69	0.138467	up	5.53986e-68	All genes	FALSE
EFCAB10	EFCAB10	-0.00295508	1.93512	0.094294	0.835315	0.249301	0.750699	TRUE	27.7085	3.68496	2.8331e-118	0.361155	up	2.27881e-116	All genes	FALSE
CDHR3	CDHR3	0.00181406	2.57834	0.0913579	0.932743	0.186462	0.813538	TRUE	25.5602	3.20092	4.4269e-135	0.556344	up	7.25594e-133	All genes	FALSE
CAV2	CAV2	-0.0036591	1.19122	0.102605	0.435582	0.892724	0.107276	TRUE	23.3173	6.63714	4.95155e-31	0.139668	down	3.92465e-30	All genes	FALSE
TSPAN12	TSPAN12	-0.00185946	1.14782	0.0991332	0.391678	0.866689	0.133311	TRUE	21.6824	6.84608	5.37625e-28	0.0953365	down	3.79703e-27	All genes	FALSE
IQUB	IQUB	-0.00334905	1.49691	0.0954463	0.610866	0.420661	0.579339	TRUE	32.241	5.14454	9.84306e-74	0.197423	up	2.30476e-72	All genes	FALSE
LRRC4	LRRC4	-0.000723017	1.2908	0.0957203	0.510703	0.588247	0.411753	TRUE	37.1075	7.50538	1.11197e-40	0.0820434	up	1.18815e-39	All genes	FALSE
UBE2H	UBE2H	-0.00518705	1.49234	0.0959978	0.684276	0.42817	0.57183	TRUE	30.564	6.70347	9.33177e-41	0.0600292	up	9.9957e-40	All genes	FALSE
CEP41	CEP41	-0.00459499	1.25782	0.0982416	0.473972	0.590619	0.409381	TRUE	37.1587	7.59143	8.55981e-40	0.0778213	up	8.90527e-39	All genes	FALSE
TTC26	TTC26	-0.00567503	1.41395	0.0989174	0.561508	0.475865	0.524135	TRUE	33.402	5.668	3.57433e-63	0.150108	up	6.75005e-62	All genes	FALSE
PIP	PIP	-0.00107092	2.01294	0.0982913	1.21237	0.552956	0.447044	TRUE	36.4475	7.51092	1.30279e-39	0.0711356	up	1.3473e-38	All genes	FALSE
PDIA4	PDIA4	-0.00498746	1.5323	0.0941135	0.603361	0.291755	0.708245	TRUE	17.9918	7.4622	6.01498e-23	0.0312585	up	3.49747e-22	All genes	FALSE
LRRC61	LRRC61	0.0023105	1.53172	0.0971888	0.633903	0.436193	0.563807	TRUE	32.0715	5.31114	2.52086e-68	0.142701	up	5.31523e-67	All genes	FALSE
DNAJB6	DNAJB6	-0.00311232	1.50189	0.0933782	0.608811	0.328281	0.671719	TRUE	23.2049	6.69437	1.93923e-32	0.0449753	up	1.61361e-31	All genes	FALSE
PTPRN2	PTPRN2	-0.000729852	1.45866	0.0988181	0.590151	0.443442	0.556558	TRUE	31.6924	5.75222	2.9394e-57	0.0988792	up	4.81784e-56	All genes	FALSE
WDR60	WDR60	0.0003232	1.677	0.0935617	0.665755	0.311132	0.688868	TRUE	28.1071	4.0987	3.85525e-98	0.209247	up	1.7443e-96	All genes	FALSE
MID1	MID1	-0.00141787	1.23864	0.0958837	0.401192	0.580235	0.419765	TRUE	37.5737	8.85789	1.2784e-29	0.0466734	up	9.5654e-29	All genes	TRUE
OFD1	OFD1	-0.00497141	1.38945	0.0968335	0.598279	0.472428	0.527572	TRUE	32.2192	8.79222	1.71113e-25	0.034489	up	1.10271e-24	All genes	TRUE
SYAP1	SYAP1	0.00189589	1.4908	0.096497	0.666743	0.381872	0.618128	TRUE	26.5284	7.68174	1.03951e-27	0.0370789	up	7.24155e-27	All genes	FALSE
APOO	APOO	-6.79776e-05	1.45236	0.0921291	0.643154	0.427268	0.572732	TRUE	30.5857	6.41102	1.7295e-44	0.0671446	up	2.06376e-43	All genes	FALSE
DMD	DMD	0.00109428	1.29834	0.0956495	0.50638	0.557191	0.442809	TRUE	36.2076	7.66201	9.76955e-38	0.0640832	up	9.62223e-37	All genes	FALSE
CFAP47	CFAP47	-0.00123618	1.52974	0.0967016	0.625013	0.402807	0.597193	TRUE	31.7091	4.95796	9.27493e-78	0.202722	up	2.39084e-76	All genes	FALSE
RPGR	RPGR	-0.00840531	1.39139	0.0981495	0.573325	0.484148	0.515852	TRUE	33.7027	5.78426	2.45369e-61	0.147656	up	4.46859e-60	All genes	FALSE
MID1IP1	MID1IP1	-0.00390165	1.38178	0.0944698	0.558971	0.506553	0.493447	TRUE	34.0945	7.65257	2.73605e-35	0.0534064	up	2.47584e-34	All genes	FALSE
EFHC2	EFHC2	-0.00291454	1.33771	0.0977916	0.522133	0.546781	0.453219	TRUE	35.3585	6.52452	2.41086e-51	0.142875	up	3.50219e-50	All genes	FALSE
USP11	USP11	-0.000258452	1.31078	0.0983408	0.484625	0.539782	0.460218	TRUE	36.0277	9.43135	5.07671e-25	0.0355033	up	3.20504e-24	All genes	TRUE
RBM3	RBM3	-0.00163433	1.45271	0.0984589	0.723893	0.449508	0.550492	TRUE	34.655	9.27617	8.85524e-25	0.0342832	down	5.53023e-24	All genes	FALSE
PCSK1N	PCSK1N	-0.00675869	1.73588	0.0956244	0.81527	0.481311	0.518689	TRUE	33.4427	6.06579	7.47689e-55	0.103031	up	1.17453e-53	All genes	FALSE
SLC35A2	SLC35A2	-0.0073749	1.30987	0.09724	0.465149	0.527664	0.472336	TRUE	34.7683	7.14533	2.59934e-41	0.068642	up	2.84389e-40	All genes	FALSE
RIBC1	RIBC1	-0.00410825	1.44746	0.09729	0.596731	0.455524	0.544476	TRUE	33.045	5.48134	7.84294e-67	0.170971	up	1.61068e-65	All genes	FALSE
FAM104B	FAM104B	-0.00931623	1.56762	0.0965957	0.687885	0.357147	0.642853	TRUE	28.3033	5.01402	1.50527e-66	0.110579	up	3.04808e-65	All genes	FALSE
MAGT1	MAGT1	-0.00257323	1.09951	0.0979751	0.263222	0.880203	0.119797	TRUE	19.021	8.8668	2.34813e-16	0.0555288	down	9.9358e-16	All genes	FALSE
ARMCX3	ARMCX3	-0.00651125	1.15279	0.102081	0.331759	0.84233	0.15767	TRUE	15.4954	10.0325	2.4888e-12	0.0302442	down	8.10048e-12	All genes	TRUE
NGFRAP1	NGFRAP1	-0.00267751	1.35404	0.099276	0.595244	0.723322	0.276678	TRUE	22.0889	5.65777	1.8144e-42	0.0712838	down	2.05766e-41	All genes	FALSE
MORF4L2	MORF4L2	-0.000983839	1.99114	0.10076	0.776437	0.16821	0.83179	TRUE	17.1165	4.10104	4.13381e-64	0.121694	up	7.9624e-63	All genes	FALSE
PIH1D3	PIH1D3	0.000498423	1.68928	0.0923938	0.74665	0.3699	0.6301	TRUE	31.0909	4.71579	5.53559e-84	0.23046	up	1.60292e-82	All genes	FALSE
PSMD10	PSMD10	-0.000518144	1.30139	0.0977789	0.473351	0.522846	0.477154	TRUE	35.0287	9.5813	1.45085e-23	0.032386	up	8.62073e-23	All genes	FALSE
AKAP14	AKAP14	-0.00180873	1.97836	0.0918539	0.875917	0.283628	0.716372	TRUE	28.5183	3.93399	3.63174e-108	0.296924	up	1.99677e-106	All genes	FALSE
IDS	IDS	-0.0075676	1.45273	0.0957232	0.614007	0.419905	0.580095	TRUE	30.0905	6.2431	4.32307e-46	0.0697106	up	5.4348e-45	All genes	FALSE
CETN2	CETN2	-0.00821218	3.21468	0.096732	1.10755	0.130459	0.869541	TRUE	20.1523	2.69419	1.25471e-131	0.422666	up	1.78683e-129	All genes	FALSE
CH17-340M24.3	CH17-340M24.3	-0.000124471	2.00044	0.0909618	0.847811	0.231607	0.768393	TRUE	24.213	3.61941	9.01867e-106	0.209897	up	4.66341e-104	All genes	FALSE
GDI1	GDI1	0.00179291	1.36084	0.0961328	0.507654	0.466504	0.533496	TRUE	31.949	6.91718	4.15054e-40	0.0602093	up	4.34406e-39	All genes	FALSE
TUSC3	TUSC3	-0.00370729	2.12639	0.094713	0.901814	0.170283	0.829717	TRUE	19.6958	3.59163	2.18169e-88	0.176854	up	7.23373e-87	All genes	FALSE
PCM1	PCM1	0.00654463	2.07115	0.0901561	0.900154	0.165292	0.834708	TRUE	19.5686	3.55691	2.76066e-89	0.180836	up	9.3679e-88	All genes	FALSE
NAT1	NAT1	-0.000818671	1.30979	0.0971352	0.470269	0.548702	0.451298	TRUE	35.365	6.54235	1.00581e-50	0.117038	up	1.45141e-49	All genes	TRUE
INTS10	INTS10	-0.000370409	1.33174	0.0960015	0.503302	0.45463	0.54537	TRUE	31.0834	7.64461	3.7729e-32	0.045085	up	3.10665e-31	All genes	FALSE
ADAM28	ADAM28	-0.00116258	1.44597	0.0991488	0.689187	0.88943	0.11057	TRUE	24.1928	4.19459	2.85409e-68	0.45032	down	6.00326e-67	All genes	TRUE
SARAF	SARAF	0.89642	3.12411	0.785587	0.806658	0.214385	0.785615	TRUE	21.1789	4.07513	1.13487e-75	0.133679	up	2.74614e-74	All genes	FALSE
PPP2CB	PPP2CB	-0.00810236	1.33447	0.0974178	0.514375	0.529691	0.470309	TRUE	35.5349	9.4748	1.94436e-24	0.0341546	up	1.19707e-23	All genes	FALSE
WHSC1L1	WHSC1L1	0.00527619	1.43605	0.0958308	0.556106	0.371399	0.628601	TRUE	24.6522	7.94754	1.32379e-24	0.0324097	up	8.19069e-24	All genes	FALSE
VDAC3	VDAC3	0.00252604	1.67495	0.0945321	0.710889	0.263905	0.736095	TRUE	22.2656	4.90686	3.802e-56	0.0882762	up	6.08249e-55	All genes	FALSE
SLC20A2	SLC20A2	-0.00399471	1.27123	0.0990497	0.445581	0.570882	0.429118	TRUE	36.3695	7.32066	1.25597e-41	0.0782042	up	1.3846e-40	All genes	TRUE
SMIM19	SMIM19	0.0011744	1.63381	0.0888034	0.693672	0.29792	0.70208	TRUE	21.32	6.3668	1.19892e-33	0.047665	up	1.03324e-32	All genes	FALSE
EFCAB1	EFCAB1	-0.00133621	2.62422	0.0975745	0.968972	0.163089	0.836911	TRUE	23.8249	2.86488	2.11557e-147	0.563889	up	1.8186e-144	All genes	FALSE
RB1CC1	RB1CC1	-0.00617892	1.60495	0.0966395	0.683783	0.338313	0.661687	TRUE	25.3872	5.95599	2.93905e-43	0.062697	up	3.38615e-42	All genes	FALSE
RP11-53M11.3	RP11-53M11.3	-0.000954914	1.44649	0.0989974	0.627394	0.479605	0.520395	TRUE	33.7186	5.76405	6.44117e-62	0.158103	up	1.20074e-60	All genes	FALSE
RP1	RP1	-0.00608619	1.49119	0.0973579	0.630045	0.423581	0.576419	TRUE	32.1993	5.16991	9.25851e-73	0.179771	up	2.12213e-71	All genes	FALSE
TMEM68	TMEM68	0.00229917	1.3414	0.0956577	0.496513	0.472103	0.527897	TRUE	32.5399	6.16889	2.66183e-51	0.0865844	up	3.85389e-50	All genes	FALSE
PPP1R42	PPP1R42	0.0039242	1.5961	0.0955573	0.665751	0.375045	0.624955	TRUE	31.0829	4.72835	1.80441e-83	0.221459	up	5.15621e-82	All genes	FALSE
CSPP1	CSPP1	-0.00672118	1.70996	0.0942233	0.703505	0.30629	0.69371	TRUE	28.3785	4.05648	2.72689e-101	0.231553	up	1.30156e-99	All genes	FALSE
C8orf34	C8orf34	0.000187436	1.26588	0.0973935	0.433741	0.572235	0.427765	TRUE	35.985	6.81602	6.73536e-48	0.121124	up	8.90565e-47	All genes	FALSE
RDH10	RDH10	-0.0010968	1.23854	0.0941049	0.614176	0.81599	0.18401	TRUE	21.9881	6.03269	2.0882e-36	0.0946075	down	1.97391e-35	All genes	TRUE
ZC2HC1A	ZC2HC1A	-0.00408435	1.4519	0.0991977	0.584168	0.415078	0.584922	TRUE	30.9109	5.25372	9.48933e-67	0.122269	up	1.93053e-65	All genes	FALSE
TPD52	TPD52	-0.00139075	1.15578	0.0985373	0.399931	0.790014	0.209986	TRUE	19.2845	7.47727	3.76871e-23	0.0468475	down	2.20539e-22	All genes	FALSE
FABP5	FABP5	-0.00447779	2.10618	0.0986472	1.63067	0.796134	0.203866	TRUE	26.1785	4.02155	9.33162e-91	0.305403	down	3.24255e-89	All genes	FALSE
TMEM67	TMEM67	-0.00248819	1.618	0.0953714	0.616802	0.332515	0.667485	TRUE	29.9568	4.33597	7.26047e-95	0.266773	up	2.90653e-93	All genes	FALSE
RGS22	RGS22	-0.000226064	1.7386	0.0896773	0.750538	0.322291	0.677709	TRUE	30.2677	4.4017	2.68279e-93	0.29683	up	1.00889e-91	All genes	FALSE
SPAG1	SPAG1	-0.00798513	1.70127	0.0918445	0.715179	0.297504	0.702496	TRUE	27.4699	4.05861	1.79022e-97	0.197749	up	7.85438e-96	All genes	FALSE
AZIN1	AZIN1	-0.00331462	1.78752	0.0944607	0.766642	0.260872	0.739128	TRUE	23.2932	4.48668	1.02864e-68	0.113254	up	2.18479e-67	All genes	FALSE
OXR1	OXR1	-0.00351515	1.27983	0.100803	0.453736	0.535471	0.464529	TRUE	35.851	10.0115	3.1977e-22	0.0304669	up	1.80614e-21	All genes	TRUE
EIF3H	EIF3H	-0.00445411	1.32738	0.0946816	0.621986	0.547645	0.452355	TRUE	28.475	8.28769	1.80465e-25	0.0337145	down	1.15954e-24	All genes	FALSE
MED30	MED30	-0.00272355	1.25467	0.100063	0.433755	0.543585	0.456415	TRUE	35.6061	7.74507	3.35805e-36	0.0582123	up	3.14009e-35	All genes	FALSE
SQLE	SQLE	-0.0010074	1.49747	0.092935	0.708475	0.386692	0.613308	TRUE	27.4895	7.27717	1.3563e-31	0.0432331	up	1.10217e-30	All genes	FALSE
LRRC6	LRRC6	0.000111376	1.57502	0.0946822	0.677807	0.400071	0.599929	TRUE	31.4036	4.92985	1.45806e-77	0.181252	up	3.73634e-76	All genes	FALSE
RHPN1	RHPN1	0.00192984	1.36599	0.094557	0.52069	0.495382	0.504618	TRUE	33.7734	5.93803	4.19221e-58	0.123007	up	7.03937e-57	All genes	FALSE
MAPK15	MAPK15	-0.00606347	1.95028	0.0979577	0.802297	0.233157	0.766843	TRUE	26.9235	3.50058	8.89118e-126	0.378611	up	9.90226e-124	All genes	FALSE
FAM83H-AS1	FAM83H-AS1	-0.00540473	1.27897	0.0998307	0.473591	0.569698	0.430302	TRUE	35.9553	6.80096	4.77334e-48	0.12058	up	6.35008e-47	All genes	FALSE
PPP1R16A	PPP1R16A	-0.00126878	1.49232	0.0922633	0.644517	0.379828	0.620172	TRUE	28.544	5.71233	4.97765e-52	0.0797569	up	7.35389e-51	All genes	FALSE
SPATA6L	SPATA6L	-0.00506372	1.25143	0.0978686	0.438169	0.591864	0.408136	TRUE	36.9255	7.35749	3.88913e-42	0.0886734	up	4.33695e-41	All genes	TRUE
MPDZ	MPDZ	-0.00126346	1.29303	0.098613	0.468341	0.553759	0.446241	TRUE	35.6226	6.74302	5.15475e-48	0.10125	up	6.82611e-47	All genes	FALSE
PSIP1	PSIP1	0.000477735	1.40592	0.0927281	0.641994	0.425632	0.574368	TRUE	29.9422	7.60116	2.274e-31	0.0433429	up	1.8291e-30	All genes	FALSE
RRAGA	RRAGA	-0.000935199	1.60084	0.0908112	0.678868	0.305533	0.694467	TRUE	22.8775	5.90595	1.42102e-40	0.0587941	up	1.51094e-39	All genes	FALSE
MLLT3	MLLT3	-0.00264887	1.10355	0.101014	0.263416	0.864652	0.135348	TRUE	18.1602	9.60774	3.25539e-14	0.0415584	down	1.20647e-13	All genes	TRUE
FOCAD	FOCAD	-0.00460931	1.31671	0.0955985	0.511986	0.57916	0.42084	TRUE	36.384	7.01647	1.07251e-45	0.108011	up	1.32908e-44	All genes	FALSE
HACD4	HACD4	-0.00470759	1.62419	0.0958112	0.722875	0.324738	0.675262	TRUE	27.6569	4.53981	6.40088e-79	0.139838	up	1.69526e-77	All genes	FALSE
IFT74	IFT74	-0.00582201	1.39212	0.103364	0.553426	0.485189	0.514811	TRUE	33.2379	6.17047	1.42568e-52	0.0936952	up	2.12434e-51	All genes	FALSE
C9orf72	C9orf72	0.00255433	1.40718	0.0975161	0.540552	0.454873	0.545127	TRUE	32.4326	5.54056	1.58117e-63	0.126155	up	3.03215e-62	All genes	FALSE
DNAJA1	DNAJA1	0.00536882	1.81848	0.0951432	0.824259	0.247312	0.752688	TRUE	20.3433	5.28143	4.9427e-46	0.0707434	up	6.20481e-45	All genes	FALSE
CHMP5	CHMP5	-0.0145193	1.79162	0.0940021	0.736129	0.252784	0.747216	TRUE	17.181	6.28546	1.40178e-30	0.0448568	up	1.09311e-29	All genes	FALSE
C9orf24	C9orf24	-0.00654011	4.01344	0.105157	1.23449	0.138811	0.861189	TRUE	21.7555	2.6463	6.41005e-138	0.604233	up	1.35815e-135	All genes	FALSE
DNAI1	DNAI1	-0.00212121	1.82114	0.0965963	0.714501	0.296107	0.703893	TRUE	29.6434	4.20106	1.34359e-99	0.350436	up	6.20838e-98	All genes	FALSE
FAM166B	FAM166B	-0.0078424	2.34411	0.0939866	0.863985	0.192284	0.807716	TRUE	25.3246	3.13134	9.17726e-141	0.493038	up	2.84725e-138	All genes	FALSE
SPAG8	SPAG8	-0.00176905	1.83664	0.09392	0.71577	0.270142	0.729858	TRUE	28.4582	3.87172	4.11304e-111	0.352947	up	2.51619e-109	All genes	FALSE
RP11-144A16.8	RP11-144A16.8	-0.00505099	1.73456	0.095449	0.745047	0.380646	0.619354	TRUE	31.4044	4.81923	1.95068e-81	0.227347	up	5.36252e-80	All genes	FALSE
FAM27C	FAM27C	-0.00482011	1.47344	0.0967205	0.618465	0.488275	0.511725	TRUE	33.8863	5.84487	1.56464e-60	0.150978	up	2.79671e-59	All genes	FALSE
RP11-395E19.6	RP11-395E19.6	-0.00100063	1.3995	0.0946496	0.565355	0.560814	0.439186	TRUE	35.7388	6.71873	4.55807e-49	0.137039	up	6.20627e-48	All genes	FALSE
C9orf135	C9orf135	-0.00647648	2.20677	0.0985925	0.894844	0.222624	0.777376	TRUE	26.3308	3.37504	5.81432e-131	0.38754	up	8.0173e-129	All genes	FALSE
KIF27	KIF27	-0.00047414	1.31404	0.0973343	0.506915	0.549168	0.450832	TRUE	35.4707	6.62271	1.337e-49	0.109573	up	1.85535e-48	All genes	FALSE
NINJ1	NINJ1	-0.000385724	1.19662	0.0974368	0.459522	0.81692	0.18308	TRUE	22.2991	5.95809	9.6237e-38	0.0961321	down	9.48934e-37	All genes	FALSE
WNK2	WNK2	0.000761592	1.19939	0.0999806	0.402932	0.879967	0.120033	TRUE	23.6251	6.18124	3.28093e-36	0.146835	down	3.07127e-35	All genes	TRUE
FBP1	FBP1	0.00389422	1.11839	0.101427	0.334526	0.825009	0.174991	TRUE	16.6851	9.47165	3.60141e-14	0.0320958	down	1.32734e-13	All genes	TRUE
CCDC180	CCDC180	-0.00477822	1.50242	0.0941814	0.643664	0.4366	0.5634	TRUE	32.8278	5.35999	1.53082e-69	0.199353	up	3.32455e-68	All genes	FALSE
FSD1L	FSD1L	0.000177919	1.25056	0.100519	0.427091	0.594754	0.405246	TRUE	36.4944	7.13429	1.02649e-44	0.128547	up	1.23164e-43	All genes	FALSE
CTNNAL1	CTNNAL1	-0.000447043	1.38709	0.0976468	0.599696	0.536009	0.463991	TRUE	35.4051	7.04603	1.90255e-43	0.0778441	up	2.21251e-42	All genes	FALSE
SLC31A1	SLC31A1	-0.00467175	1.22794	0.0964235	0.523388	0.795763	0.204237	TRUE	20.258	7.11018	5.82848e-26	0.056127	down	3.83285e-25	All genes	TRUE
CNTRL	CNTRL	-0.0086487	1.54941	0.0948773	0.644983	0.35639	0.64361	TRUE	29.6327	4.52696	1.02358e-85	0.179625	up	3.08743e-84	All genes	FALSE
MORN5	MORN5	-0.00621364	2.61786	0.0970689	1.01035	0.199243	0.800757	TRUE	25.5051	3.17586	1.74248e-139	0.454588	up	4.09106e-137	All genes	FALSE
STRBP	STRBP	-0.0110493	1.35938	0.094083	0.597986	0.477957	0.522043	TRUE	33.0782	6.81282	6.78687e-43	0.0678621	up	7.76779e-42	All genes	FALSE
WDR38	WDR38	-0.00478688	2.53863	0.0927946	1.01109	0.197009	0.802991	TRUE	25.3913	3.15523	2.45713e-140	0.453746	up	6.8855e-138	All genes	FALSE
GAPVD1	GAPVD1	0.00218678	1.38357	0.0945997	0.578834	0.463344	0.536656	TRUE	31.7326	7.9375	1.59889e-30	0.0426292	up	1.2457e-29	All genes	FALSE
CFAP157	CFAP157	-0.00258235	2.92469	0.0969684	0.971459	0.15581	0.84419	TRUE	23.603	2.88097	1.57416e-137	0.657892	up	3.25588e-135	All genes	FALSE
TTC16	TTC16	-0.00218001	1.30699	0.10138	0.48749	0.565647	0.434353	TRUE	35.7995	6.7698	1.66312e-48	0.140999	up	2.233e-47	All genes	FALSE
AK1	AK1	-0.00600518	1.60783	0.0950851	0.800835	0.330918	0.669082	TRUE	23.7268	6.98606	1.96884e-30	0.0416181	up	1.52981e-29	All genes	FALSE
LCN2	LCN2	0.000377245	2.89021	0.0890524	2.08368	0.386057	0.613943	TRUE	37.6427	8.70436	1.01375e-30	0.049492	down	7.94804e-30	All genes	TRUE
COQ4	COQ4	0.00456925	2.05685	0.0962465	0.868598	0.160781	0.839219	TRUE	18.3255	3.74716	7.62947e-78	0.154761	up	1.97254e-76	All genes	FALSE
ODF2	ODF2	-0.00160703	1.35684	0.0951923	0.521702	0.487583	0.512417	TRUE	33.3073	6.16883	9.8171e-53	0.0946569	up	1.47036e-51	All genes	FALSE
SPTAN1	SPTAN1	-0.00212711	1.4393	0.0938835	0.587273	0.405212	0.594788	TRUE	29.2536	6.24025	7.18041e-45	0.0666244	up	8.66336e-44	All genes	FALSE
WDR34	WDR34	-0.0026322	1.87032	0.0917297	0.811041	0.23338	0.76662	TRUE	23.2484	3.943	5.06535e-87	0.156814	up	1.61775e-85	All genes	FALSE
ENDOG	ENDOG	-0.00484755	1.80792	0.0940511	0.821919	0.319235	0.680765	TRUE	28.3208	4.25849	8.0712e-92	0.185665	up	2.89729e-90	All genes	FALSE
PHYHD1	PHYHD1	-0.00337162	1.20424	0.0983219	0.411103	0.771156	0.228844	TRUE	18.6262	7.57278	2.48133e-22	0.0409343	down	1.40609e-21	All genes	FALSE
ASS1	ASS1	0.000699955	1.66375	0.0956365	0.993728	0.818194	0.181806	TRUE	25.4279	4.00102	7.165e-87	0.31849	down	2.27994e-85	All genes	FALSE
CFAP77	CFAP77	-0.000141426	1.54203	0.0951714	0.67331	0.391564	0.608436	TRUE	31.5372	4.90083	4.7834e-79	0.204288	up	1.27075e-77	All genes	FALSE
AK8	AK8	-0.00542126	1.34025	0.0990221	0.540881	0.551782	0.448218	TRUE	35.5306	6.62262	3.46052e-50	0.143802	up	4.92812e-49	All genes	FALSE
C9orf9	C9orf9	0.000122703	2.09775	0.100231	0.927693	0.22599	0.77401	TRUE	25.5968	3.41007	5.331e-125	0.298238	up	5.64761e-123	All genes	FALSE
SURF2	SURF2	0.000528874	1.32374	0.0968471	0.528385	0.534966	0.465034	TRUE	36.1352	10.0577	3.24913e-22	0.0305856	up	1.834e-21	All genes	FALSE
C9orf116	C9orf116	0.00493322	3.10826	0.0945025	1.11357	0.158709	0.841291	TRUE	22.5802	2.77098	2.60224e-148	0.464022	up	3.59808e-145	All genes	FALSE
UBAC1	UBAC1	-0.00562193	1.69861	0.0921295	0.764825	0.316872	0.683128	TRUE	27.5231	4.41281	5.47063e-83	0.15059	up	1.54297e-81	All genes	FALSE
WI2-1959D15.1	WI2-1959D15.1	-0.00614364	1.36608	0.0973186	0.572107	0.620949	0.379051	TRUE	37.3555	7.62865	2.63824e-40	0.118025	up	2.77462e-39	All genes	FALSE
NPDC1	NPDC1	0.000595666	1.39247	0.100028	0.592007	0.891364	0.108636	TRUE	24.232	4.30364	2.21851e-66	0.408218	down	4.48191e-65	All genes	FALSE
IFITM1	IFITM1	-0.00101541	1.6189	0.0965136	1.01159	0.725195	0.274805	TRUE	24.6706	4.54846	1.96239e-69	0.136232	down	4.2512e-68	All genes	FALSE
SIGIRR	SIGIRR	0.00149962	1.37482	0.0943457	0.509131	0.405256	0.594744	TRUE	28.4464	6.75319	1.54999e-37	0.0531999	up	1.51289e-36	All genes	FALSE
CRACR2B	CRACR2B	-0.00243739	1.36865	0.0946215	0.637405	0.602296	0.397704	TRUE	25.6937	7.04012	7.8317e-32	0.0435935	down	6.40622e-31	All genes	FALSE
MUC5B	MUC5B	-0.0020551	2.70101	0.0990107	1.57346	0.877397	0.122603	TRUE	24.5155	3.87605	3.50767e-79	0.567645	down	9.34697e-78	All genes	FALSE
SYT8	SYT8	9.06177e-05	2.02041	0.0935559	1.04579	0.401464	0.598536	TRUE	30.6438	5.31688	1.60416e-64	0.113853	up	3.12452e-63	All genes	FALSE
PHLDA2	PHLDA2	-0.00161626	1.27413	0.0968266	0.767435	0.864276	0.135724	TRUE	18.6551	8.70535	1.13364e-16	0.0551703	down	4.90435e-16	All genes	FALSE
CARS	CARS	-0.00209171	1.78996	0.0942182	0.929296	0.366846	0.633154	TRUE	29.6423	4.94553	7.87995e-72	0.129322	up	1.76881e-70	All genes	FALSE
APBB1	APBB1	0.000771006	1.31956	0.0982727	0.509029	0.603971	0.396029	TRUE	37.5635	7.69634	2.60935e-39	0.0810486	up	2.66676e-38	All genes	TRUE
STK33	STK33	-0.00284371	2.1149	0.0981484	0.787558	0.205025	0.794975	TRUE	25.842	3.24186	1.03236e-136	0.452236	up	2.03821e-134	All genes	FALSE
C11orf16	C11orf16	-0.00551854	1.60824	0.091975	0.627601	0.324902	0.675098	TRUE	29.8326	4.29256	2.74127e-96	0.274616	up	1.15599e-94	All genes	FALSE
ZBED5-AS1	ZBED5-AS1	-0.00372198	1.47863	0.0942049	0.617008	0.411514	0.588486	TRUE	30.2868	5.60962	2.95384e-57	0.0938037	up	4.8324e-56	All genes	FALSE
SAA2	SAA2	-8.04101e-05	2.72008	0.0982266	1.76103	0.658824	0.341176	TRUE	20.1765	7.4515	2.13322e-24	0.0329117	down	1.3087e-23	All genes	TRUE
SAA1	SAA1	-0.00206404	3.29873	0.0955744	2.14374	0.544008	0.455992	TRUE	29.6453	7.23611	3.77691e-34	0.047867	down	3.29417e-33	All genes	FALSE
LDHA	LDHA	-0.00182188	1.29783	0.0952049	0.658242	0.697714	0.302286	TRUE	23.176	5.12612	3.71275e-53	0.0863405	down	5.63858e-52	All genes	FALSE
RP11-428C19.4	RP11-428C19.4	-0.00362357	1.39085	0.0953288	0.573333	0.567654	0.432346	TRUE	35.9448	6.82909	7.55098e-48	0.134724	up	9.93869e-47	All genes	FALSE
MUC15	MUC15	-0.00812427	1.54873	0.0935037	0.626726	0.338406	0.661594	TRUE	26.4748	5.23464	2.12459e-57	0.0889844	up	3.49551e-56	All genes	FALSE
CCDC34	CCDC34	-0.00416594	1.33715	0.0963703	0.623249	0.545938	0.454062	TRUE	35.9393	7.19361	1.81923e-42	0.0780166	up	2.06045e-41	All genes	FALSE
DCDC1	DCDC1	-0.000485904	1.36417	0.0960671	0.534927	0.487143	0.512857	TRUE	33.9245	5.83963	6.38337e-61	0.16857	up	1.15046e-59	All genes	FALSE
HIPK3	HIPK3	-0.00417454	1.33827	0.0955417	0.515219	0.470862	0.529138	TRUE	32.1948	7.46109	6.84771e-35	0.0505999	up	6.12627e-34	All genes	FALSE
CAT	CAT	-0.000371429	1.46476	0.0990861	0.57294	0.392369	0.607631	TRUE	28.8678	5.73537	3.40699e-52	0.0804115	up	5.04199e-51	All genes	FALSE
C11orf74	C11orf74	9.44001e-05	1.71885	0.0976951	0.765286	0.330528	0.669472	TRUE	28.3008	4.44158	1.93481e-84	0.159343	up	5.67826e-83	All genes	FALSE
MDK	MDK	-0.00264741	1.77473	0.0913757	1.21764	0.593505	0.406495	TRUE	29.1647	4.74381	1.23098e-76	0.140776	down	3.0817e-75	All genes	FALSE
C11orf49	C11orf49	-0.00734277	1.5042	0.0945984	0.589528	0.372484	0.627516	TRUE	29.3506	4.8085	3.94873e-75	0.13739	up	9.39799e-74	All genes	FALSE
CELF1	CELF1	-0.00374213	1.46104	0.0937053	0.59106	0.43508	0.56492	TRUE	30.4611	6.64984	2.93218e-41	0.0608753	up	3.19998e-40	All genes	FALSE
AGBL2	AGBL2	-0.00132559	1.54244	0.095729	0.63548	0.4105	0.5895	TRUE	32.0123	5.05238	8.20275e-76	0.205789	up	1.99043e-74	All genes	FALSE
TNKS1BP1	TNKS1BP1	0.00171177	1.11862	0.102616	0.321849	0.862499	0.137501	TRUE	19.9407	7.83096	5.34858e-21	0.0646433	down	2.854e-20	All genes	FALSE
DTX4	DTX4	-0.0029312	1.11171	0.101396	0.288491	0.883608	0.116392	TRUE	20.6251	7.9925	1.48538e-20	0.0751748	down	7.74984e-20	All genes	TRUE
MS4A8	MS4A8	-0.00460275	2.8123	0.0975571	0.982251	0.125127	0.874873	TRUE	20.0416	2.6533	1.1203e-130	0.452719	up	1.47456e-128	All genes	FALSE
TMEM138	TMEM138	-0.00536348	1.25978	0.099319	0.454042	0.563033	0.436967	TRUE	36.2269	7.49971	2.01298e-39	0.0692759	up	2.06943e-38	All genes	FALSE
PPP1R32	PPP1R32	-0.00857612	1.95542	0.097648	0.882694	0.311196	0.688804	TRUE	29.3472	4.17039	6.71155e-100	0.270902	up	3.13458e-98	All genes	FALSE
LRRC10B	LRRC10B	-0.00292489	1.58528	0.0948073	0.746722	0.436107	0.563893	TRUE	32.5286	5.33342	4.14981e-69	0.162125	up	8.90108e-68	All genes	FALSE
SCGB2A1	SCGB2A1	-0.00301702	1.78276	0.0902496	0.935169	0.419059	0.580941	TRUE	31.6269	5.32523	9.44366e-67	0.128936	up	1.93028e-65	All genes	FALSE
SCGB1A1	SCGB1A1	1.18048	9.50319	1.11123	2.74325	0.788472	0.211528	TRUE	25.1822	3.1288	2.52042e-141	0.437045	down	8.42112e-139	All genes	FALSE
PLA2G16	PLA2G16	-0.00298549	1.57342	0.0959177	0.641301	0.327577	0.672423	TRUE	22.5131	6.92642	7.92677e-30	0.0409347	up	5.99825e-29	All genes	FALSE
STIP1	STIP1	-0.00679922	1.33906	0.100085	0.54088	0.484511	0.515489	TRUE	33.0646	7.7256	1.59138e-33	0.048826	up	1.36739e-32	All genes	FALSE
DNAJC4	DNAJC4	0.000895069	1.19116	0.0991545	0.410364	0.812029	0.187971	TRUE	21.7489	6.29762	1.17436e-33	0.0804595	down	1.01408e-32	All genes	FALSE
ZNHIT2	ZNHIT2	-0.002064	1.3331	0.0947486	0.509121	0.514718	0.485282	TRUE	34.2906	6.61167	1.73079e-47	0.0841994	up	2.24744e-46	All genes	FALSE
CST6	CST6	-0.00353204	1.69131	0.0945272	0.781124	0.406392	0.593608	TRUE	31.741	5.02559	1.23706e-75	0.181149	up	2.97683e-74	All genes	FALSE
RAD9A	RAD9A	-0.00922948	1.27661	0.100005	0.457491	0.564457	0.435543	TRUE	36.1753	7.21598	1.43455e-42	0.0803847	up	1.62901e-41	All genes	TRUE
POLD4	POLD4	-0.00208611	1.23887	0.100765	0.558023	0.780459	0.219541	TRUE	23.2598	5.25234	9.64599e-50	0.111781	down	1.34502e-48	All genes	FALSE
PITPNM1	PITPNM1	-0.0046275	1.39881	0.0951966	0.622751	0.494914	0.505086	TRUE	33.8104	6.43521	2.66702e-49	0.0870229	up	3.67753e-48	All genes	FALSE
NUDT8	NUDT8	0.00188992	1.13291	0.0982525	0.405121	0.865114	0.134886	TRUE	21.2079	6.78626	6.48499e-28	0.0933093	down	4.55785e-27	All genes	FALSE
UNC93B1	UNC93B1	-0.00496034	1.65376	0.0966167	0.672242	0.293647	0.706353	TRUE	24.0421	4.9718	3.18074e-58	0.0908715	up	5.38617e-57	All genes	FALSE
ALDH3B1	ALDH3B1	-0.00320237	2.5589	0.0904027	0.983316	0.148398	0.851602	TRUE	20.6191	2.92539	1.5813e-125	0.32211	up	1.7171e-123	All genes	FALSE
LRTOMT	LRTOMT	-0.000812261	1.74853	0.103501	0.730398	0.324439	0.675561	TRUE	28.6879	4.22688	1.38277e-94	0.203398	up	5.46004e-93	All genes	FALSE
PLEKHB1	PLEKHB1	-0.00625908	1.55466	0.0936648	0.638189	0.387585	0.612415	TRUE	30.8044	4.79592	5.18355e-80	0.176731	up	1.40279e-78	All genes	FALSE
DNAJB13	DNAJB13	-0.00520951	1.45858	0.0929315	0.578508	0.429622	0.570378	TRUE	31.9925	5.18626	1.44749e-71	0.159627	up	3.24082e-70	All genes	FALSE
UCP2	UCP2	-0.0103317	1.91715	0.0892532	0.922585	0.236617	0.763383	TRUE	18.1959	5.74106	4.82837e-37	0.055971	up	4.6347e-36	All genes	FALSE
PGM2L1	PGM2L1	0.000385976	1.34826	0.0970471	0.54003	0.498996	0.501004	TRUE	33.6895	8.11	4.00795e-31	0.0449244	up	3.1913e-30	All genes	FALSE
MAP6	MAP6	-0.00356525	1.43269	0.09325	0.663493	0.538214	0.461786	TRUE	35.3165	6.49982	1.23729e-51	0.141735	up	1.81254e-50	All genes	FALSE
ANKRD42	ANKRD42	0.00428235	1.29039	0.0981327	0.468205	0.590471	0.409529	TRUE	36.6769	7.16318	2.93237e-44	0.103454	up	3.4705e-43	All genes	FALSE
CCDC81	CCDC81	-0.0012518	1.39064	0.0988359	0.558367	0.584389	0.415611	TRUE	36.459	7.05824	1.96659e-45	0.117447	up	2.40616e-44	All genes	TRUE
SMCO4	SMCO4	0.00178184	1.10453	0.0979939	0.280596	0.888183	0.111817	TRUE	20.5867	7.99837	2.21192e-20	0.0775746	down	1.14648e-19	All genes	TRUE
C11orf97	C11orf97	-0.00543351	2.20103	0.0927571	0.917014	0.259913	0.740087	TRUE	27.6998	3.70376	3.15952e-117	0.336051	up	2.40761e-115	All genes	FALSE
CEP126	CEP126	-0.000488794	1.84345	0.0972989	0.736598	0.239108	0.760892	TRUE	26.3269	3.48011	2.70047e-124	0.313947	up	2.79274e-122	All genes	FALSE
C11orf70	C11orf70	-0.0109395	2.13333	0.0944834	0.955516	0.226624	0.773376	TRUE	26.1637	3.41446	1.06097e-127	0.334462	up	1.29812e-125	All genes	FALSE
ACAT1	ACAT1	-0.00823356	1.38104	0.0946332	0.562188	0.47262	0.52738	TRUE	32.1926	8.08487	6.90195e-30	0.0417742	up	5.24102e-29	All genes	FALSE
C11orf88	C11orf88	0.000912655	3.3098	0.0973488	1.11446	0.154065	0.845935	TRUE	23.0289	2.75642	6.88243e-147	0.584638	up	4.98231e-144	All genes	FALSE
PIH1D2	PIH1D2	0.00071966	1.54895	0.0971428	0.647643	0.400744	0.599256	TRUE	31.5779	4.93122	3.72018e-78	0.196666	up	9.6758e-77	All genes	FALSE
BCO2	BCO2	0.000519436	1.29629	0.098819	0.457326	0.562216	0.437784	TRUE	35.6759	6.71766	4.28888e-49	0.146159	up	5.8581e-48	All genes	FALSE
TTC12	TTC12	-0.00195673	1.30226	0.100419	0.467686	0.565606	0.434394	TRUE	36.0615	7.06227	2.52973e-44	0.0871532	up	3.00215e-43	All genes	TRUE
IFT46	IFT46	-0.00312504	1.41426	0.094857	0.544363	0.438428	0.561572	TRUE	32.2501	5.25706	2.35727e-70	0.160325	up	5.1711e-69	All genes	FALSE
CCDC153	CCDC153	-0.00977133	1.87686	0.0964101	0.79258	0.292591	0.707409	TRUE	28.6792	3.98353	2.74873e-106	0.288266	up	1.45599e-104	All genes	FALSE
USP2	USP2	-0.00154593	1.27329	0.0984687	0.464432	0.60579	0.39421	TRUE	36.94	7.33866	8.0832e-43	0.117194	up	9.23931e-42	All genes	TRUE
USP2-AS1	USP2-AS1	-0.0037814	1.25774	0.0979177	0.435089	0.62715	0.37285	TRUE	37.6152	7.67426	5.42605e-40	0.105284	up	5.65859e-39	All genes	TRUE
TRIM29	TRIM29	-0.00137377	1.39133	0.0950451	0.596961	0.507535	0.492465	TRUE	34.3322	7.46689	2.57347e-37	0.0580361	up	2.48673e-36	All genes	TRUE
SPA17	SPA17	-0.00234276	2.20437	0.095882	0.963599	0.221652	0.778348	TRUE	25.9752	3.36311	4.21364e-130	0.346693	up	5.46327e-128	All genes	FALSE
VSIG2	VSIG2	-0.00135458	1.25043	0.0989958	0.55945	0.740606	0.259394	TRUE	21.0247	6.09883	1.56979e-35	0.0625872	down	1.43093e-34	All genes	FALSE
TMEM45B	TMEM45B	-0.00198864	1.36688	0.10114	0.531897	0.496551	0.503449	TRUE	33.7723	6.13001	2.30935e-54	0.104546	up	3.58879e-53	All genes	FALSE
AKR1C1	AKR1C1	0.00184573	1.62457	0.0940997	0.980243	0.450367	0.549633	TRUE	33.9873	8.32217	6.91782e-30	0.042897	down	5.24848e-29	All genes	FALSE
CELF2	CELF2	-0.000285851	1.21931	0.0989096	0.358026	0.870372	0.129628	TRUE	19.6737	7.93719	2.96828e-20	0.065734	down	1.52577e-19	All genes	FALSE
RPP38	RPP38	-0.00449291	1.27309	0.0936971	0.476252	0.557438	0.442562	TRUE	36.3916	8.08189	3.79388e-34	0.0551049	up	3.30566e-33	All genes	TRUE
SPAG6	SPAG6	-0.00199366	2.33309	0.093768	0.886369	0.200753	0.799247	TRUE	25.3246	3.15716	3.43311e-140	0.431422	up	9.31982e-138	All genes	FALSE
ARMC3	ARMC3	-0.000423989	2.04569	0.0885151	0.81961	0.219995	0.780005	TRUE	26.8551	3.46366	3.30927e-127	0.436209	up	3.93803e-125	All genes	FALSE
C10orf67	C10orf67	-0.00188147	1.27088	0.101085	0.451051	0.617906	0.382094	TRUE	37.1387	7.49761	2.10037e-41	0.120204	up	2.30378e-40	All genes	TRUE
ENKUR	ENKUR	0.000161947	2.04045	0.0985017	0.816762	0.251436	0.748564	TRUE	27.8075	3.70177	1.15041e-117	0.374107	up	8.92286e-116	All genes	FALSE
ANKRD26	ANKRD26	-0.00191354	1.2697	0.0976386	0.467201	0.57103	0.42897	TRUE	36.3745	7.24025	1.33803e-42	0.0825565	up	1.52139e-41	All genes	TRUE
ARMC4	ARMC4	0.000636465	1.64893	0.0934811	0.68087	0.320842	0.679158	TRUE	29.9283	4.31016	6.70362e-96	0.283799	up	2.77307e-94	All genes	FALSE
MSMB	MSMB	0.00236035	3.3758	0.0974702	2.6135	0.835328	0.164672	TRUE	24.8157	4.21282	2.69083e-76	0.276435	down	6.67864e-75	All genes	FALSE
FRMPD2	FRMPD2	0.00301312	1.43704	0.0935932	0.586425	0.48321	0.51679	TRUE	33.7081	5.76834	9.30277e-62	0.154106	up	1.7156e-60	All genes	FALSE
MRLN	MRLN	-0.00186485	1.50314	0.0946849	0.747761	0.493051	0.506949	TRUE	34.2833	6.01064	4.19753e-58	0.149239	up	7.03937e-57	All genes	FALSE
ANK3	ANK3	0.00196286	1.41649	0.0982435	0.547586	0.415247	0.584753	TRUE	28.3764	7.76423	1.0236e-28	0.038754	up	7.41616e-28	All genes	FALSE
C10orf107	C10orf107	-0.00424392	1.72358	0.0920554	0.717663	0.306513	0.693487	TRUE	29.0006	4.09928	7.54098e-102	0.263485	up	3.63936e-100	All genes	FALSE
STOX1	STOX1	-0.00203037	1.50498	0.097695	0.607007	0.39925	0.60075	TRUE	30.6374	4.9931	3.37136e-73	0.142047	up	7.78909e-72	All genes	FALSE
CFAP70	CFAP70	0.00148274	1.85127	0.0991936	0.739309	0.271658	0.728342	TRUE	28.2399	3.83086	1.85692e-112	0.331603	up	1.20381e-110	All genes	FALSE
VCL	VCL	0.000700037	1.13009	0.10101	0.291813	0.887956	0.112044	TRUE	16.5521	10.934	9.95371e-11	0.0363459	down	2.87269e-10	All genes	FALSE
COMTD1	COMTD1	1.12847e-05	1.16013	0.0982077	0.387727	0.867083	0.132917	TRUE	23.5734	5.79743	1.42492e-40	0.149588	down	1.51324e-39	All genes	FALSE
TMEM254	TMEM254	-0.00041157	1.3801	0.0972383	0.533619	0.476012	0.523988	TRUE	32.9475	5.97325	1.48119e-55	0.101301	up	2.35231e-54	All genes	FALSE
DYDC2	DYDC2	-0.0057941	1.88864	0.0948442	0.835211	0.329534	0.670466	TRUE	30.0082	4.35657	3.603e-94	0.261783	up	1.40988e-92	All genes	FALSE
ADIRF	ADIRF	0.00208532	1.48198	0.0934942	0.79835	0.765063	0.234937	TRUE	25.3235	4.27962	6.95611e-79	0.192434	down	1.83671e-77	All genes	FALSE
AVPI1	AVPI1	-0.00446309	1.13332	0.0997712	0.402193	0.892006	0.107994	TRUE	19.7851	8.90772	1.67619e-16	0.0639761	down	7.15883e-16	All genes	FALSE
DPCD	DPCD	-0.00166174	1.9728	0.0959954	0.853996	0.244488	0.755512	TRUE	25.9111	3.58164	7.03898e-116	0.256365	up	5.182e-114	All genes	FALSE
C10orf95	C10orf95	-0.00865649	1.74364	0.0940296	0.677996	0.336313	0.663687	TRUE	30.0477	4.36556	6.09875e-94	0.263225	up	2.35466e-92	All genes	FALSE
ARL3	ARL3	0.00108257	1.79094	0.096271	0.809497	0.271627	0.728373	TRUE	24.0093	4.52698	2.35908e-69	0.113976	up	5.09784e-68	All genes	FALSE
BORCS7	BORCS7	-0.00219927	1.38671	0.104844	0.535668	0.474774	0.525226	TRUE	32.1345	8.98137	2.00252e-24	0.032748	up	1.23113e-23	All genes	FALSE
CFAP43	CFAP43	0.0035333	2.54092	0.0978574	0.854093	0.164681	0.835319	TRUE	24.3029	2.99715	1.44484e-136	0.642324	up	2.78918e-134	All genes	FALSE
CFAP58	CFAP58	-0.00109832	1.28603	0.0956011	0.477962	0.576255	0.423745	TRUE	36.0582	6.92918	8.9338e-47	0.140483	up	1.13628e-45	All genes	FALSE
BBIP1	BBIP1	-0.00141698	1.48392	0.0951812	0.615119	0.386337	0.613663	TRUE	29.3372	5.30601	8.58834e-62	0.101922	up	1.58738e-60	All genes	FALSE
CASC2	CASC2	0.000244688	1.27478	0.0989653	0.446638	0.57232	0.42768	TRUE	36.021	6.83305	1.09376e-47	0.118611	up	1.42879e-46	All genes	FALSE
TACC2	TACC2	-0.000299149	1.42946	0.0892085	0.604381	0.403856	0.596144	TRUE	27.9622	7.72709	1.29135e-28	0.0385514	up	9.32498e-28	All genes	FALSE
OAT	OAT	0.000504462	1.30257	0.0934617	0.665233	0.672465	0.327535	TRUE	20.8611	6.38786	5.4373e-33	0.0467742	down	4.61267e-32	All genes	FALSE
FANK1	FANK1	-0.00411832	1.88537	0.0920037	0.840371	0.241289	0.758711	TRUE	26.7187	3.54676	4.67907e-122	0.31316	up	4.32416e-120	All genes	FALSE
MGMT	MGMT	-0.00178789	1.62073	0.0922071	0.760163	0.283537	0.716463	TRUE	21.3815	6.131	3.83161e-36	0.0518921	up	3.57521e-35	All genes	FALSE
BNIP3	BNIP3	-0.00162284	1.47659	0.0954102	0.57601	0.410343	0.589657	TRUE	28.7328	6.83969	5.76507e-37	0.0523171	up	5.52772e-36	All genes	FALSE
CFAP46	CFAP46	-0.00257095	1.52991	0.0946835	0.610215	0.399701	0.600299	TRUE	31.4789	4.90682	1.30111e-78	0.194748	up	3.42506e-77	All genes	FALSE
KNDC1	KNDC1	-0.00307705	1.32904	0.099551	0.514362	0.545694	0.454306	TRUE	35.3585	6.52445	2.40703e-51	0.142847	up	3.50219e-50	All genes	FALSE
TUBGCP2	TUBGCP2	-0.0052218	1.52694	0.0978444	0.617428	0.379592	0.620408	TRUE	28.6599	5.44093	1.94746e-57	0.0909347	up	3.21017e-56	All genes	FALSE
WNK1	WNK1	-0.0080208	1.37378	0.0926796	0.52561	0.479267	0.520733	TRUE	32.4125	8.08682	4.456e-30	0.0422143	up	3.41352e-29	All genes	FALSE
PTMS	PTMS	0.000812858	1.26999	0.0963959	0.565476	0.652592	0.347408	TRUE	23.2798	6.16309	6.09365e-38	0.0541028	down	6.03597e-37	All genes	FALSE
GPR162	GPR162	-0.00627829	1.52863	0.0934685	0.656816	0.443955	0.556045	TRUE	32.9793	5.42836	3.91886e-68	0.189683	up	8.20316e-67	All genes	FALSE
LRRC23	LRRC23	-0.000358952	2.65885	0.0969059	0.973056	0.153231	0.846769	TRUE	22.6314	2.74295	2.66732e-149	0.499497	up	7.72367e-146	All genes	FALSE
PZP	PZP	-0.00372627	1.28119	0.0987487	0.464321	0.61185	0.38815	TRUE	37.1318	7.41845	4.09698e-42	0.111326	up	4.55121e-41	All genes	FALSE
GABARAPL1	GABARAPL1	0.000169418	1.13752	0.10084	0.318342	0.869891	0.130109	TRUE	18.018	10.0396	4.14363e-13	0.0395191	down	1.42614e-12	All genes	FALSE
HEBP1	HEBP1	-0.00501518	1.11469	0.0997382	0.337907	0.808521	0.191479	TRUE	17.1064	8.96826	8.64895e-16	0.0330018	down	3.55745e-15	All genes	TRUE
MGP	MGP	0.0012886	1.69173	0.0977685	1.33409	0.845799	0.154201	TRUE	22.803	5.72112	3.37895e-40	0.135549	down	3.54504e-39	All genes	FALSE
ARHGDIB	ARHGDIB	0.000155159	1.2869	0.0979087	0.555418	0.774029	0.225971	TRUE	21.5782	6.13314	1.39138e-35	0.0720032	down	1.27364e-34	All genes	FALSE
ETNK1	ETNK1	-0.00306478	1.45696	0.100417	0.561512	0.373435	0.626565	TRUE	27.5978	5.79154	4.51014e-49	0.0734428	up	6.15064e-48	All genes	FALSE
CASC1	CASC1	-0.00614468	1.5831	0.0990488	0.628393	0.361113	0.638887	TRUE	30.6164	4.57546	1.70086e-87	0.230748	up	5.49269e-86	All genes	FALSE
KIF21A	KIF21A	-0.00914292	2.0402	0.0894418	0.836736	0.212303	0.787697	TRUE	23.1508	3.49791	2.06421e-107	0.21652	up	1.11378e-105	All genes	FALSE
NELL2	NELL2	-0.00111519	1.56794	0.0956063	0.603942	0.512	0.488	TRUE	34.3394	6.06298	4.49967e-57	0.136082	up	7.3337e-56	All genes	FALSE
SLC38A2	SLC38A2	0.000129986	1.24547	0.0961404	0.489724	0.781924	0.218076	TRUE	20.8717	6.50462	4.19083e-31	0.0638286	down	3.33386e-30	All genes	FALSE
CCDC65	CCDC65	-0.00831462	1.68042	0.0911901	0.734042	0.328443	0.671557	TRUE	29.722	4.30378	2.59893e-95	0.248138	up	1.05499e-93	All genes	FALSE
TUBA1A	TUBA1A	-0.00328309	3.52535	0.0915607	1.47145	0.142175	0.857825	TRUE	21.4184	2.72799	1.03082e-141	0.433219	up	3.73113e-139	All genes	FALSE
TMBIM6	TMBIM6	1.53955	3.40946	0.946336	0.776776	0.235928	0.764072	TRUE	15.8612	5.37601	7.43334e-39	0.0627788	up	7.49982e-38	All genes	TRUE
AQP5	AQP5	0.000892934	1.73099	0.0977984	1.1273	0.82087	0.17913	TRUE	25.0446	4.1259	1.45698e-80	0.281036	down	3.96765e-79	All genes	FALSE
SMAGP	SMAGP	-0.00238565	1.12899	0.0971398	0.351205	0.881388	0.118612	TRUE	21.7578	7.26276	2.89724e-25	0.094354	down	1.84384e-24	All genes	FALSE
GALNT6	GALNT6	-0.00207634	1.21505	0.0984028	0.544354	0.827327	0.172673	TRUE	21.5597	6.87392	1.78409e-28	0.0754982	down	1.28086e-27	All genes	TRUE
KRT7	KRT7	-5.93515e-05	2.01822	0.0946124	1.36307	0.617975	0.382025	TRUE	29.0663	4.45539	1.70059e-86	0.174136	down	5.29499e-85	All genes	FALSE
KRT4	KRT4	-0.000539297	1.65317	0.0968208	1.0657	0.845038	0.154962	TRUE	21.6158	6.80174	1.0833e-28	0.0880148	down	7.84217e-28	All genes	TRUE
C12orf10	C12orf10	-0.00456455	1.31072	0.0942453	0.478731	0.546173	0.453827	TRUE	36.5537	9.89434	3.35433e-23	0.0325415	up	1.9662e-22	All genes	FALSE
CALCOCO1	CALCOCO1	-0.00322748	1.24505	0.0977173	0.394708	0.571214	0.428786	TRUE	37.2821	9.0949	7.04019e-28	0.0422897	up	4.94008e-27	All genes	TRUE
DTX3	DTX3	-0.00458451	1.31078	0.0964922	0.473003	0.539218	0.460782	TRUE	35.0874	6.50726	1.28881e-50	0.106236	up	1.85056e-49	All genes	FALSE
RP11-620J15.3	RP11-620J15.3	0.0017069	2.04874	0.0979925	0.831743	0.252791	0.747209	TRUE	26.438	3.59103	6.35683e-118	0.275891	up	5.02016e-116	All genes	FALSE
MDM1	MDM1	-0.00600183	1.24005	0.099552	0.462578	0.582273	0.417727	TRUE	36.6215	7.17988	7.61679e-44	0.0950112	up	8.92943e-43	All genes	FALSE
MDM2	MDM2	-0.000973945	1.36608	0.0939706	0.578555	0.469445	0.530555	TRUE	32.1763	8.04444	3.67657e-30	0.0422331	up	2.82891e-29	All genes	FALSE
LYZ	LYZ	-0.000171531	1.36596	0.0983316	0.928023	0.829011	0.170989	TRUE	19.773	7.95802	1.05897e-20	0.0555443	down	5.57193e-20	All genes	TRUE
CCT2	CCT2	-0.00478957	1.57539	0.0935107	0.690327	0.325128	0.674872	TRUE	23.0526	6.7974	2.19212e-31	0.0433053	up	1.76651e-30	All genes	FALSE
ATXN7L3B	ATXN7L3B	-0.000493932	1.30167	0.0967899	0.485094	0.511437	0.488563	TRUE	34.2648	8.8728	1.17966e-26	0.03732	up	7.9133e-26	All genes	FALSE
CAPS2	CAPS2	-0.00710816	1.28441	0.102822	0.461796	0.510804	0.489196	TRUE	34.2054	6.11587	1.32397e-55	0.117728	up	2.10647e-54	All genes	FALSE
TSPAN19	TSPAN19	0.000310362	1.95311	0.094801	0.871138	0.325912	0.674088	TRUE	29.8314	4.30992	1.69054e-95	0.26102	up	6.89472e-94	All genes	FALSE
LRRIQ1	LRRIQ1	-0.0109338	2.77959	0.100796	0.933426	0.149286	0.850714	TRUE	23.0886	2.80434	1.95293e-137	0.660259	up	3.94537e-135	All genes	FALSE
CEP290	CEP290	-0.00754323	1.51422	0.0945562	0.636075	0.382747	0.617253	TRUE	29.0924	5.27556	5.91843e-62	0.1017	up	1.10566e-60	All genes	FALSE
NUDT4	NUDT4	-0.00243627	1.51361	0.0936808	0.670048	0.391556	0.608444	TRUE	28.0074	6.81834	2.41351e-36	0.0510802	up	2.26907e-35	All genes	FALSE
CEP83	CEP83	-0.003317	1.39951	0.0957814	0.561149	0.448985	0.551015	TRUE	32.3422	5.4775	8.23094e-65	0.130522	up	1.61404e-63	All genes	FALSE
LTA4H	LTA4H	-0.000806493	1.2105	0.0954444	0.476143	0.708282	0.291718	TRUE	18.4522	7.1579	6.30274e-25	0.0366239	down	3.95892e-24	All genes	FALSE
CFAP54	CFAP54	-0.00222831	1.57309	0.0995122	0.636234	0.350249	0.649751	TRUE	30.3887	4.49056	5.06223e-90	0.242614	up	1.73132e-88	All genes	FALSE
CHPT1	CHPT1	-0.00273968	1.19218	0.0996185	0.447313	0.796295	0.203705	TRUE	18.9224	7.70051	1.21398e-21	0.0450377	down	6.6788e-21	All genes	TRUE
TXNRD1	TXNRD1	-0.00612109	1.35431	0.0985308	0.555842	0.527003	0.472997	TRUE	35.5177	9.49908	2.63061e-24	0.033914	up	1.60817e-23	All genes	FALSE
APPL2	APPL2	-0.0086406	1.49342	0.0975625	0.591696	0.405204	0.594796	TRUE	30.9365	4.99959	7.09321e-74	0.148711	up	1.66537e-72	All genes	FALSE
C12orf75	C12orf75	-0.0110192	2.66144	0.0954903	1.10046	0.197774	0.802226	TRUE	24.7836	3.12323	6.42091e-140	0.38653	up	1.59367e-137	All genes	FALSE
CKAP4	CKAP4	0.00226189	1.12731	0.100004	0.355686	0.824945	0.175055	TRUE	18.9723	7.92373	1.98139e-20	0.048853	down	1.02945e-19	All genes	FALSE
GLTP	GLTP	0.00123999	1.17029	0.100318	0.394368	0.795239	0.204761	TRUE	19.2842	7.26862	3.54447e-24	0.0502664	down	2.1517e-23	All genes	FALSE
IFT81	IFT81	-0.00827528	1.54795	0.0936716	0.655574	0.349409	0.650591	TRUE	28.9253	4.55368	2.32726e-82	0.157433	up	6.45908e-81	All genes	FALSE
ATP2A2	ATP2A2	0.000249207	1.8521	0.0940559	0.849578	0.234239	0.765761	TRUE	20.7062	4.74473	1.29908e-56	0.0914816	up	2.0976e-55	All genes	FALSE
TCTN1	TCTN1	-0.0032687	1.96759	0.0954542	0.794395	0.214223	0.785777	TRUE	24.0181	3.39178	8.91348e-118	0.252515	up	6.9758e-116	All genes	FALSE
ATXN2	ATXN2	-0.00423247	1.35095	0.0964175	0.50837	0.480254	0.519746	TRUE	32.7442	6.75315	3.67436e-43	0.0677492	up	4.22211e-42	All genes	FALSE
CFAP73	CFAP73	-0.00462644	2.08929	0.0981153	0.818761	0.228547	0.771453	TRUE	26.8189	3.46267	1.78117e-127	0.405391	up	2.14903e-125	All genes	FALSE
IQCD	IQCD	-6.32194e-05	1.6125	0.0935886	0.702144	0.370972	0.629028	TRUE	30.7348	4.66686	2.07548e-84	0.20595	up	6.0706e-83	All genes	FALSE
SUDS3	SUDS3	-0.00213478	1.28238	0.0951797	0.478322	0.528843	0.471157	TRUE	35.353	8.859	1.22651e-27	0.0398307	up	8.51694e-27	All genes	FALSE
CCDC60	CCDC60	-0.00454262	1.31257	0.096619	0.505801	0.545775	0.454225	TRUE	35.4505	6.7621	2.26011e-47	0.0942012	up	2.92602e-46	All genes	FALSE
PXN	PXN	-0.00309272	1.27533	0.0904479	0.443962	0.553952	0.446048	TRUE	36.0884	8.12091	1.7113e-33	0.052864	up	1.46753e-32	All genes	FALSE
DYNLL1	DYNLL1	1.97681	4.73174	1.29633	0.965337	0.322247	0.677753	TRUE	28.3188	3.8812	4.21895e-110	0.302332	up	2.51027e-108	All genes	FALSE
NRAV	NRAV	0.000765318	1.28737	0.0954076	0.463948	0.577007	0.422993	TRUE	36.4775	7.20919	3.62972e-43	0.0868556	up	4.17634e-42	All genes	FALSE
UNC119B	UNC119B	0.0004311	1.36529	0.0955914	0.526507	0.587036	0.412964	TRUE	36.6727	7.17556	4.87018e-44	0.0993057	up	5.75608e-43	All genes	FALSE
ANAPC5	ANAPC5	-0.000999808	1.44411	0.0968077	0.558792	0.362636	0.637364	TRUE	26.5198	6.05987	2.03268e-43	0.062959	up	2.36068e-42	All genes	FALSE
MORN3	MORN3	-0.00366416	1.39562	0.0978184	0.571448	0.50105	0.49895	TRUE	34.3072	6.01502	3.52558e-58	0.158399	up	5.94694e-57	All genes	FALSE
WDR66	WDR66	-0.00183085	1.75414	0.096993	0.799402	0.328471	0.671529	TRUE	30.1221	4.37975	1.2326e-93	0.268906	up	4.67581e-92	All genes	FALSE
LRRC43	LRRC43	-0.00358441	1.36348	0.098855	0.499612	0.488997	0.511003	TRUE	33.7627	5.78493	1.47631e-61	0.156309	up	2.69994e-60	All genes	FALSE
CLIP1	CLIP1	-0.000886208	1.39294	0.100277	0.574598	0.499029	0.500971	TRUE	33.8199	8.63859	1.12318e-27	0.0388457	up	7.81819e-27	All genes	FALSE
HCAR2	HCAR2	-0.002488	1.23623	0.0994885	0.629392	0.877549	0.122451	TRUE	22.7779	7.05892	1.19329e-27	0.110108	down	8.29951e-27	All genes	TRUE
DNAH10	DNAH10	0.00428389	2.18043	0.0904929	0.864089	0.211663	0.788337	TRUE	26.3717	3.35394	6.68764e-132	0.445258	up	9.68259e-130	All genes	FALSE
STX2	STX2	0.000546918	1.26585	0.0976807	0.471107	0.608798	0.391202	TRUE	37.1937	7.42347	4.96021e-42	0.104147	up	5.50311e-41	All genes	FALSE
EP400	EP400	-0.00130849	1.33048	0.0995323	0.511043	0.544922	0.455078	TRUE	35.4487	6.9702	1.7355e-44	0.0818057	up	2.06808e-43	All genes	FALSE
IFT88	IFT88	0.00332879	1.57502	0.0946377	0.621286	0.342311	0.657689	TRUE	29.6516	4.35407	8.34629e-93	0.221055	up	3.03365e-91	All genes	FALSE
TNFRSF19	TNFRSF19	0.000456939	1.44212	0.0945702	0.564381	0.421579	0.578421	TRUE	31.4884	5.14014	2.26302e-71	0.146555	up	5.05369e-70	All genes	FALSE
MIPEP	MIPEP	-0.0032978	1.29503	0.0964233	0.469542	0.537544	0.462456	TRUE	35.1298	6.76308	9.09565e-47	0.0878419	up	1.15517e-45	All genes	FALSE
ATP12A	ATP12A	0.000255986	1.35612	0.0985659	0.685547	0.848961	0.151039	TRUE	22.639	5.68526	2.01853e-40	0.133768	down	2.13581e-39	All genes	TRUE
HSPH1	HSPH1	-0.00459645	2.31932	0.093139	1.01863	0.194122	0.805878	TRUE	22.9611	3.30258	1.40476e-117	0.253363	up	1.07993e-115	All genes	FALSE
NBEA	NBEA	-0.00326339	1.42741	0.0949931	0.567897	0.507889	0.492111	TRUE	34.0757	7.67335	4.41354e-35	0.0529583	up	3.9731e-34	All genes	FALSE
SPG20	SPG20	-0.00748547	1.2974	0.0956363	0.455694	0.534337	0.465663	TRUE	35.7927	9.80692	4.56765e-23	0.0318947	up	2.66482e-22	All genes	FALSE
CCNA1	CCNA1	-0.0065053	1.46015	0.094901	0.757506	0.59419	0.40581	TRUE	37.0754	7.37937	1.89211e-42	0.110296	up	2.1402e-41	All genes	FALSE
STOML3	STOML3	-0.00526044	1.78863	0.091562	0.729127	0.32304	0.67696	TRUE	29.8976	4.3032	4.39713e-96	0.281863	up	1.82765e-94	All genes	FALSE
MRPS31	MRPS31	0.000308246	2.49406	0.0946819	1.04131	0.179334	0.820666	TRUE	22.4639	3.10379	4.66895e-127	0.296795	up	5.48097e-125	All genes	FALSE
DGKH	DGKH	-0.00137635	1.31034	0.0978411	0.527317	0.552084	0.447916	TRUE	36.029	7.43824	8.32559e-40	0.069498	up	8.67199e-39	All genes	FALSE
FAM216B	FAM216B	0.00224561	2.40078	0.0970649	0.960625	0.189835	0.810165	TRUE	25.3635	3.13914	1.80535e-140	0.491476	up	5.22768e-138	All genes	FALSE
KPNA3	KPNA3	0.00081565	1.2972	0.0974876	0.497772	0.56021	0.43979	TRUE	36.9352	8.8868	7.57232e-29	0.0438975	up	5.50006e-28	All genes	FALSE
KCNRG	KCNRG	-0.00348697	1.31132	0.0981566	0.499184	0.609707	0.390293	TRUE	36.8564	7.44309	8.8728e-42	0.133354	up	9.80636e-41	All genes	FALSE
NEK5	NEK5	-0.00213624	1.62917	0.0927599	0.672088	0.331886	0.668114	TRUE	29.9316	4.34112	1.57763e-94	0.258034	up	6.20131e-93	All genes	FALSE
SUGT1	SUGT1	-0.00183935	1.37341	0.0944496	0.555595	0.445851	0.554149	TRUE	30.9466	7.13788	1.56105e-36	0.0526376	up	1.48368e-35	All genes	FALSE
KCTD12	KCTD12	-0.00389018	1.70218	0.0961205	0.706057	0.378409	0.621591	TRUE	31.0122	4.72258	2.12408e-83	0.2141	up	6.0104e-82	All genes	FALSE
NDFIP2	NDFIP2	0.00231308	1.3497	0.0993065	0.52503	0.463752	0.536248	TRUE	31.2662	9.17459	7.23368e-23	0.030104	up	4.19206e-22	All genes	FALSE
FGF14	FGF14	-0.00334954	1.43299	0.10007	0.58151	0.501595	0.498405	TRUE	34.2069	5.97495	1.1803e-58	0.151672	up	2.01836e-57	All genes	FALSE
CDC16	CDC16	-0.00226446	1.51297	0.0954457	0.630077	0.39596	0.60404	TRUE	29.2726	5.69178	1.02597e-53	0.0840151	up	1.57745e-52	All genes	FALSE
RNASE1	RNASE1	0.000205883	2.21217	0.095283	1.54269	0.77397	0.22603	TRUE	26.3132	3.89288	1.44221e-97	0.296563	down	6.35962e-96	All genes	FALSE
NDRG2	NDRG2	0.000628233	1.30759	0.097644	0.553418	0.644397	0.355603	TRUE	21.387	7.74837	1.71607e-23	0.0311934	down	1.01688e-22	All genes	TRUE
RBM23	RBM23	0.000937553	1.28048	0.0995858	0.450641	0.459431	0.540569	TRUE	31.0548	8.05251	4.42397e-29	0.0399469	up	3.23766e-28	All genes	FALSE
REC8	REC8	-0.0013655	1.44714	0.0956003	0.582844	0.43939	0.56061	TRUE	31.5032	5.68688	3.47448e-58	0.100523	up	5.87214e-57	All genes	FALSE
HECTD1	HECTD1	0.000633253	1.64488	0.0887155	0.687811	0.285274	0.714726	TRUE	21.7309	5.72133	1.60886e-41	0.0611194	up	1.76913e-40	All genes	FALSE
SPTSSA	SPTSSA	0.000258294	1.25198	0.0992527	0.495898	0.794505	0.205495	TRUE	21.2772	6.63327	2.0454e-30	0.0662785	down	1.58646e-29	All genes	FALSE
FAM179B	FAM179B	0.00204047	1.29281	0.0948556	0.488089	0.563793	0.436207	TRUE	36.3097	7.5015	1.61352e-39	0.0700273	up	1.66468e-38	All genes	FALSE
DNAAF2	DNAAF2	-0.00640016	1.29	0.0994475	0.483884	0.560014	0.439986	TRUE	36.8012	8.7625	1.59155e-29	0.0451719	up	1.18473e-28	All genes	FALSE
JKAMP	JKAMP	-0.00222842	1.35345	0.0970965	0.517219	0.457118	0.542882	TRUE	31.4151	7.24611	5.10085e-36	0.0520433	up	4.73915e-35	All genes	FALSE
PCNXL4	PCNXL4	-0.000643236	1.28767	0.0986486	0.468926	0.519565	0.480435	TRUE	34.4751	6.89245	5.90425e-44	0.0746824	up	6.95932e-43	All genes	FALSE
MNAT1	MNAT1	-0.000869657	1.34194	0.0990947	0.530636	0.460719	0.539281	TRUE	31.7623	7.11939	1.08904e-37	0.0553911	up	1.06898e-36	All genes	FALSE
SYNE2	SYNE2	-0.00339857	1.89523	0.0938074	0.762148	0.169409	0.830591	TRUE	16.6105	4.2907	1.99123e-58	0.108346	up	3.38509e-57	All genes	TRUE
PPP1R36	PPP1R36	0.00039584	1.29442	0.0993499	0.495541	0.616946	0.383054	TRUE	37.3322	7.53409	3.93861e-41	0.110171	up	4.27684e-40	All genes	TRUE
CHURC1	CHURC1	-0.000194899	1.60688	0.099156	0.655928	0.303293	0.696707	TRUE	20.8821	6.72612	5.06226e-30	0.0417964	up	3.86431e-29	All genes	FALSE
ATP6V1D	ATP6V1D	-0.00439855	1.52975	0.0940664	0.639035	0.384653	0.615347	TRUE	29.1884	5.35529	2.33237e-60	0.0982667	up	4.1519e-59	All genes	FALSE
RDH11	RDH11	-0.00129205	1.13101	0.100986	0.350395	0.866171	0.133829	TRUE	15.9856	10.4674	1.62018e-11	0.0331799	down	4.96807e-11	All genes	TRUE
DNAL1	DNAL1	-0.00355792	1.57041	0.0978698	0.65696	0.370593	0.629407	TRUE	30.1542	4.66611	2.30084e-82	0.173778	up	6.40622e-81	All genes	FALSE
PNMA1	PNMA1	0.0012579	1.33143	0.098564	0.570195	0.584166	0.415834	TRUE	36.5984	7.12005	8.77808e-45	0.111004	up	1.05763e-43	All genes	FALSE
BBOF1	BBOF1	0.000348284	1.8225	0.0919006	0.771372	0.265466	0.734534	TRUE	27.0501	3.72472	5.45568e-113	0.262743	up	3.64566e-111	All genes	FALSE
ALDH6A1	ALDH6A1	-0.000474551	1.09416	0.100409	0.280009	0.873107	0.126893	TRUE	17.6564	10.0848	8.11618e-13	0.0396026	down	2.73913e-12	All genes	TRUE
ACYP1	ACYP1	0.000752837	1.63356	0.0982798	0.690458	0.324612	0.675388	TRUE	28.1408	4.33162	3.716e-88	0.170434	up	1.22276e-86	All genes	FALSE
[truncated: 293 more rows]
